# Supplementary material for: Hibernating bear serum triggers an anti-fibrotic signature in human fibroblasts, involving ECM remodeling and MAPK signaling activation
Source: Sci Rep. 2026 Mar 21;16:14434. doi: 10.1038/s41598-026-43734-y (PMC13150032; doi:10.1038/s41598-026-43734-y)
Supplement: Supplementary file 1 — Supplementary Material 1 [file 41598_2026_43734_MOESM1_ESM.xlsx]

## Sheet: IDENTIFICATION
Table S1A. List of 4,738 proteins identified using nanoLC-MS/MS analysis in HFF1 cells
	Identification DATA from Maxquant (Andromeda) - Human proteome Swissprot (06/03/2025, 20418 entries)
Line nber	Protein IDs	Majority protein IDs	Fasta headers	Peptide counts (all)	Peptide counts (razor+unique)	Peptide counts (unique)	Number of proteins	Peptides	Razor + unique peptides	Unique peptides	Sequence coverage [%]	Unique + razor sequence coverage [%]	Unique sequence coverage [%]	Mol. weight [kDa]	Sequence length	Sequence lengths	Q-value	Score	Peptide sequences	Only identified by site	Peptide IDs	Peptide is razor	Mod. peptide IDs	Evidence IDs	MS/MS IDs	Best MS/MS	Oxidation (M) site IDs	Oxidation (M) site positions
227	sp|P80748|LV321_HUMAN;sp|A0A075B6K5|LV39_HUMAN;sp|A0A075B6K2|LV312_HUMAN	sp|P80748|LV321_HUMAN;sp|A0A075B6K5|LV39_HUMAN;sp|A0A075B6K2|LV312_HUMAN	Immunoglobulin lambda variable 3-21 OS=Homo sapiens OX=9606 GN=IGLV3-21 PE=1 SV=2; Immunoglobulin lambda variable 3-9 OS=Homo sapiens OX=9606 GN=IGLV3-9 PE=1 SV=1; Immunoglobulin lambda variable 3-12 OS=Homo sapiens OX=9606 GN=IGLV3-12 PE=1 SV=2	2;2;1	2;2;1	2;2;1	3	2	2	2	23.1	23.1	23.1	12.446	117	117;115;115	0	56.101	FSGSNSGNTATLTISR;ITCGGNNIGSK		15254;25077	True;True	16664;27416	194324;194325;194326;194327;194328;194329;194330;194331;194332;194333;328757;328758;328759;328760;328761;328762;328763;328764;328765;328766;328767;328768;328769;328770	181152;181153;181154;181155;181156;181157;306917;306918;306919;306920;306921;306922;306923;306924;306925;306926;306927;306928;306929;306930	181155;306922
228	sp|A0A0C4DH68|KV224_HUMAN;sp|A0A075B6R9|KVD24_HUMAN	sp|A0A0C4DH68|KV224_HUMAN;sp|A0A075B6R9|KVD24_HUMAN	Immunoglobulin kappa variable 2-24 OS=Homo sapiens OX=9606 GN=IGKV2-24 PE=1 SV=1; Probable non-functional immunoglobulin kappa variable 2D-24 OS=Homo sapiens OX=9606 GN=IGKV2D-24 PE=1 SV=1	2;2	1;1	1;1	2	2	1	1	16.7	10.8	10.8	13.079	120	120;120	0.0013049	3.2975	FSGSGAGTDFTLK;FSGVPDR		15250;15257	True;False	16660;16669	194263;194264;194265;194266;194267;194268;194269;194270;194393;194394;194395;194396;194397;194398;194399;194400;194401;194402	181091;181092;181093;181094;181095;181096;181097;181221;181222;181223;181224	181097;181223
229	sp|A2NJV5|KV229_HUMAN;sp|A0A0A0MRZ7|KVD26_HUMAN;sp|A0A075B6S2|KVD29_HUMAN;sp|P06310|KV230_HUMAN;sp|P01615|KVD28_HUMAN;sp|A0A075B6S6|KVD30_HUMAN;sp|A0A075B6P5|KV228_HUMAN;sp|P01614|KVD40_HUMAN;sp|A0A087WW87|KV240_HUMAN	sp|A2NJV5|KV229_HUMAN;sp|A0A0A0MRZ7|KVD26_HUMAN;sp|A0A075B6S2|KVD29_HUMAN;sp|P06310|KV230_HUMAN;sp|P01615|KVD28_HUMAN;sp|A0A075B6S6|KVD30_HUMAN;sp|A0A075B6P5|KV228_HUMAN;sp|P01614|KVD40_HUMAN;sp|A0A087WW87|KV240_HUMAN	Immunoglobulin kappa variable 2-29 OS=Homo sapiens OX=9606 GN=IGKV2-29 PE=1 SV=2; Immunoglobulin kappa variable 2D-26 OS=Homo sapiens OX=9606 GN=IGKV2D-26 PE=1 SV=1; Immunoglobulin kappa variable 2D-29 OS=Homo sapiens OX=9606 GN=IGKV2D-29 PE=1 SV=1; Immun	4;4;4;2;2;2;2;2;2	4;4;4;2;2;2;2;2;2	3;3;3;2;2;2;2;2;2	9	4	4	3	19.2	19.2	19.2	13.085	120	120;120;120;120;120;120;120;121;121	0	14.028	FSGSGSGTDFTLK;FSGSGSGTDFTLKISR;FSGVPDR;FSGVPDRFSGSGSGTDFTLK		15251;15252;15257;15258	True;True;True;True	16661;16662;16669;16670	194271;194272;194273;194274;194275;194276;194277;194278;194279;194280;194281;194282;194283;194284;194285;194286;194287;194288;194289;194290;194291;194292;194293;194294;194295;194296;194297;194298;194299;194300;194301;194302;194303;194304;194305;194306;194307;194308;194309;194310;194311;194312;194313;194314;194315;194316;194317;194318;194319;194320;194321;194393;194394;194395;194396;194397;194398;…	181098;181099;181100;181101;181102;181103;181104;181105;181106;181107;181108;181109;181110;181111;181112;181113;181114;181115;181116;181117;181118;181119;181120;181121;181122;181123;181124;181125;181126;181127;181128;181129;181130;181131;181132;181133;181134;181135;181136;181137;181138;181139;181140;181141;181142;181143;181144;181145;181146;181147;181148;181149;181221;181222;181223;181224;181225	181125;181149;181223;181225
230	sp|P04433|KV311_HUMAN;sp|A0A0A0MRZ8|KVD11_HUMAN	sp|P04433|KV311_HUMAN;sp|A0A0A0MRZ8|KVD11_HUMAN	Immunoglobulin kappa variable 3-11 OS=Homo sapiens OX=9606 GN=IGKV3-11 PE=1 SV=1; Immunoglobulin kappa variable 3D-11 OS=Homo sapiens OX=9606 GN=IGKV3D-11 PE=3 SV=6	2;2	2;2	2;2	2	2	2	2	26.1	26.1	26.1	12.575	115	115;115	0.00066845	3.629	ASQSVSSYLAWYQQKPGQAPR;LLIYDASNR		4455;31471	True;True	4860;34342	58377;58378;58379;58380;417198;417199;417200	54441;389448	54441;389448
231	sp|A0A0A0MS15|HV349_HUMAN	sp|A0A0A0MS15|HV349_HUMAN	Immunoglobulin heavy variable 3-49 OS=Homo sapiens OX=9606 GN=IGHV3-49 PE=1 SV=1	3	2	2	1	3	2	2	32.8	26.9	26.9	13.056	119	119	0.0056738	2.4608	AYGGTTEYAASVK;GRFTISR;LSCTASGFTFGDYAMSWVR		5466;18819;33684	True;False;True	5957;20567;36774;36775	70741;241047;241048;241049;241050;445111;445112;445113;445114;445115	65930;224605;224606;224607;224608;415598;415599;415600;415601;415602	65930;224608;415600	369	53
232	sp|A0A0B4J1V0|HV315_HUMAN	sp|A0A0B4J1V0|HV315_HUMAN	Immunoglobulin heavy variable 3-15 OS=Homo sapiens OX=9606 GN=IGHV3-15 PE=1 SV=1	2	1	1	1	2	1	1	15.1	9.2	9.2	12.926	119	119	0.00023469	4.5186	GRFTISR;NTLYLQMNSLK		18819;39161	False;True	20567;43494;43495	241047;241048;241049;241050;520615;520616;520617;520618;520619;520620;520621;520622;520623;520624;520625;520626;520627;520628;520629;520630;520631;520632;520633;520634;520635;520636;520637;520638;520639;520640;520641;520642	224605;224606;224607;224608;485685;485686;485687;485688;485689;485690;485691;485692;485693;485694;485695;485696;485697;485698;485699;485700;485701;485702;485703;485704;485705;485706;485707;485708;485709;485710;485711;485712	224608;485704	370	104
233	sp|A0A0B4J1V1|HV321_HUMAN;sp|P01780|HV307_HUMAN;sp|P01762|HV311_HUMAN;sp|A0A0C4DH32|HV320_HUMAN;sp|P01782|HV309_HUMAN;sp|P0DP04|HV43D_HUMAN;sp|A0A0B4J1X8|HV343_HUMAN	sp|A0A0B4J1V1|HV321_HUMAN;sp|P01780|HV307_HUMAN;sp|P01762|HV311_HUMAN;sp|A0A0C4DH32|HV320_HUMAN;sp|P01782|HV309_HUMAN	Immunoglobulin heavy variable 3-21 OS=Homo sapiens OX=9606 GN=IGHV3-21 PE=1 SV=1; Immunoglobulin heavy variable 3-7 OS=Homo sapiens OX=9606 GN=IGHV3-7 PE=1 SV=2; Immunoglobulin heavy variable 3-11 OS=Homo sapiens OX=9606 GN=IGHV3-11 PE=1 SV=2; Immunoglobu	5;4;4;3;3;2;2	1;0;0;0;0;0;0	1;0;0;0;0;0;0	7	5	1	1	44.4	16.2	16.2	12.839	117	117;117;117;117;118;118;118	0.0041161	2.632	AEDTAVYYCAR;DNAKNSLYLQMNSLR;GRFTISR;LSCAASGFTFSSYSMNWVR;NSLYLQMNSLR		1031;8069;18819;33677;39005	False;False;False;True;False	1113;8804;8805;20567;36766;36767;43321	12030;12031;12032;12033;12034;12035;12036;12037;12038;12039;12040;104691;104692;104693;104694;104695;104696;104697;104698;104699;104700;104701;104702;104703;104704;104705;104706;104707;104708;104709;104710;104711;104712;104713;104714;104715;104716;104717;104718;104719;104720;104721;104722;104723;104724;104725;104726;104727;104728;104729;104730;104731;104732;104733;104734;104735;104736;104737;1047…	11137;11138;11139;11140;11141;11142;11143;11144;11145;97988;97989;97990;97991;97992;97993;97994;97995;97996;97997;97998;97999;98000;98001;98002;98003;98004;98005;98006;98007;98008;98009;98010;98011;98012;98013;98014;98015;98016;98017;98018;98019;98020;98021;98022;98023;98024;98025;98026;98027;98028;98029;98030;98031;98032;98033;98034;98035;98036;224605;224606;224607;224608;415543;415544;415545;41…	11138;98029;224608;415546;483743	371;372	53;102
234	sp|A0A0C4DH25|KVD20_HUMAN;sp|P01619|KV320_HUMAN	sp|A0A0C4DH25|KVD20_HUMAN;sp|P01619|KV320_HUMAN	Immunoglobulin kappa variable 3D-20 OS=Homo sapiens OX=9606 GN=IGKV3D-20 PE=1 SV=1; Immunoglobulin kappa variable 3-20 OS=Homo sapiens OX=9606 GN=IGKV3-20 PE=1 SV=2	2;1	2;1	2;1	2	2	2	2	21.6	21.6	21.6	12.515	116	116;116	0	7.0132	FSGSGSGTDFTLTISR;LLIYDASSR		15253;31472	True;True	16663;34343	194322;194323;417201;417202;417203;417204	181150;181151;389449;389450;389451	181150;389451
235	sp|A0A0C4DH36|HV338_HUMAN	sp|A0A0C4DH36|HV338_HUMAN	Probable non-functional immunoglobulin heavy variable 3-38 OS=Homo sapiens OX=9606 GN=IGHV3-38 PE=1 SV=1	2	1	1	1	2	1	1	15.5	9.5	9.5	12.758	116	116	0	29.373	GRFTISR;NTLYLQMNNLR		18819;39160	False;True	20567;43492;43493	241047;241048;241049;241050;520582;520583;520584;520585;520586;520587;520588;520589;520590;520591;520592;520593;520594;520595;520596;520597;520598;520599;520600;520601;520602;520603;520604;520605;520606;520607;520608;520609;520610;520611;520612;520613;520614	224605;224606;224607;224608;485656;485657;485658;485659;485660;485661;485662;485663;485664;485665;485666;485667;485668;485669;485670;485671;485672;485673;485674;485675;485676;485677;485678;485679;485680;485681;485682;485683;485684	224608;485661	373	100
236	sp|A0A0J9YX35|HV64D_HUMAN	sp|A0A0J9YX35|HV64D_HUMAN	Immunoglobulin heavy variable 3-64D OS=Homo sapiens OX=9606 GN=IGHV3-64D PE=1 SV=1	2	1	1	1	2	1	1	15.4	9.4	9.4	12.822	117	117	0	8.2332	GRFTISR;NTLYLQMSSLR		18819;39163	False;True	20567;43498;43499	241047;241048;241049;241050;520806;520807;520808;520809;520810;520811;520812;520813;520814;520815;520816;520817;520818;520819;520820;520821;520822;520823;520824;520825;520826;520827;520828;520829;520830;520831;520832;520833;520834;520835;520836;520837;520838;520839;520840;520841	224605;224606;224607;224608;485876;485877;485878;485879;485880;485881;485882;485883;485884;485885;485886;485887;485888;485889;485890;485891;485892;485893;485894;485895;485896;485897;485898;485899;485900;485901;485902;485903;485904;485905;485906	224608;485892	374	102
237	sp|A0A2R8Y4L2|RA1L3_HUMAN	sp|A0A2R8Y4L2|RA1L3_HUMAN	Heterogeneous nuclear ribonucleoprotein A1-like 3 OS=Homo sapiens OX=9606 GN=HNRNPA1L3 PE=1 SV=2	20	1	1	1	20	1	1	68.4	14.1	14.1	34.3	320	320	0	11.99	DYFEQYGK;DYFEQYGKIEVIEIMTDR;EDTEEHHLRDYFEQYGK;GFAFVTFDDHDSVDK;GFAFVTFDDHDSVDKIVIQK;GFGFVTYATVEEVDAAMNAR;GFGFVTYATVEEVDAAMNARPHK;GGGFGGNDNFGR;GGGGYGGSGDGYNGFGNDGSNFGGGGSYNDFGNYNNQSSNFGPMK;IEVIEIMTDR;KLFIGGLSFETTDESLR;LFIGGLSFETTDESLR;NQGGYGGSSSSSSYGSGR;QEMASASSSQR;RGFAFVTFDDHDSVDK;SESPKEPEQLR;SHFEQWGTLTDCVVMR;SHFEQWGTLTDCVVMRDPNTK;YHTVNGHNCEVR;YHTVNGHNCEVRK		9037;9038;9742;16675;16676;16774;16775;16992;17003;22313;26720;29344;38799;40604;42996;44614;45197;45198;58571;58572	False;False;False;False;False;False;False;False;True;False;False;False;False;False;False;False;False;False;False;False	9845;9846;10616;18220;18221;18326;18327;18328;18329;18562;18574;24352;24353;29187;32031;43090;45054;47640;49375;50016;50017;50018;50019;64750;64751	116669;116670;116671;116672;116673;116674;116675;116676;116677;116678;116679;116680;116681;116682;116683;116684;116685;116686;116687;116688;116689;116690;116691;116692;126049;126050;126051;126052;126053;126054;126055;126056;126057;126058;126059;126060;126061;126062;126063;126064;212849;212850;212851;212852;212853;212854;212855;212856;212857;212858;212859;212860;212861;212862;212863;212864;212865;…	109240;109241;109242;109243;109244;109245;109246;109247;109248;109249;109250;109251;109252;109253;109254;109255;109256;109257;109258;109259;109260;109261;118131;118132;118133;118134;118135;118136;118137;118138;118139;118140;118141;118142;118143;118144;118145;118146;198281;198282;198283;198284;198285;198286;198287;198288;198289;198290;198291;198292;198293;198294;198295;198296;198297;198298;198299;…	109247;109261;118131;198299;198339;199636;199721;202186;202335;271455;328017;361106;481350;501513;528138;547776;554718;554797;724948;725018	375;376;377;378	46;72;137;276
238	sp|A0AVT1|UBA6_HUMAN	sp|A0AVT1|UBA6_HUMAN	Ubiquitin-like modifier-activating enzyme 6 OS=Homo sapiens OX=9606 GN=UBA6 PE=1 SV=1	46	46	46	1	46	46	46	56.7	56.7	56.7	117.97	1052	1052	0	323.31	ACIGDTLCQK;AILSNEATK;ALQLLHCFPLDIR;CLANLRPLLDSGTMGTK;CQAWDLGTNFFLSEDDVVNKR;DGSLFWQSPK;EDFTLLDFINAVK;EIFISNITQANPGIVTCLENHPHK;FDLNEPLHLSFLQNAAK;FISADVHGIWSR;FWQTYSSAEEVLQK;GDRYDALR;GHTEVIVPHLTESYNSHR;GHTEVIVPHLTESYNSHRDPPEEEIPFCTLK;GMITVTDPDLIEK;IDAHLNK;IIPAIATTTATVSGLVALEMIK;IQEFKPSNK;IQSGHSLEGCFQVIK;KPDHVPISSEDER;KPNVGCQQDSEELLK;KYVDLTVSFAPDIDGDEDLPGPPVR;LETGQFLTFR;LFCDFGDEFEVLDTTGEEPK;LQNLNIFLV…		691;2253;3109;5921;6137;7080;9651;10613;13456;14215;15772;16411;17270;17271;18190;21893;23162;24463;24606;27042;27117;27671;29151;29209;33290;36417;36994;36995;37092;37214;37464;37643;38422;39489;40497;44799;45268;48201;51565;52494;56291;56876;57741;58395;59660;59768	True;True;True;True;True;True;True;True;True;True;True;True;True;True;True;True;True;True;True;True;True;True;True;True;True;True;True;True;True;True;True;True;True;True;True;True;True;True;True;True;True;True;True;True;True;True	737;2438;3365;6443;6444;6689;7714;10517;11558;14673;15498;17241;17941;18862;18863;19857;19858;23907;25270;26728;26883;29547;29631;30222;31825;31890;36354;40162;40163;41080;41081;41197;41334;41604;41793;42648;43859;44938;49577;50092;53319;57045;58073;62274;62918;63843;64551;64552;65933;65934;66048	8140;8141;8142;8143;8144;8145;8146;8147;8148;8149;8150;8151;8152;28526;28527;28528;28529;28530;28531;28532;28533;28534;28535;28536;28537;28538;28539;28540;40030;40031;40032;40033;40034;40035;40036;40037;40038;40039;40040;40041;40042;40043;40044;40045;40046;40047;40048;40049;40050;40051;40052;40053;40054;40055;40056;40057;40058;40059;40060;40061;40062;40063;77044;77045;77046;77047;77048;77049;7705…	7592;7593;7594;7595;7596;7597;7598;7599;7600;7601;7602;7603;26599;26600;26601;26602;26603;26604;26605;26606;26607;26608;26609;37232;37233;37234;37235;37236;37237;37238;37239;37240;37241;37242;37243;37244;37245;37246;37247;37248;37249;37250;37251;37252;37253;37254;37255;37256;37257;37258;37259;37260;37261;37262;37263;37264;37265;71839;71840;71841;71842;71843;71844;71845;71846;71847;71848;71849;718…	7595;26602;37259;71845;74223;85728;117114;127642;160166;169156;187552;195391;205462;205474;216894;266846;282453;299431;301154;331740;332823;341342;358967;359699;411255;450947;459827;459837;461063;462718;465677;467605;476313;489774;500593;549503;555593;591339;633787;647329;696744;704759;714874;722862;738468;739457	379;380;381;382;383	475;594;985;992;998
239	sp|A0FGR8|ESYT2_HUMAN	sp|A0FGR8|ESYT2_HUMAN	Extended synaptotagmin-2 OS=Homo sapiens OX=9606 GN=ESYT2 PE=1 SV=1	21	21	21	1	21	21	21	30.7	30.7	30.7	102.36	921	921	0	97.48	ACDLPAWVHFPDTER;ALALLEDEER;AQPPEAGPQGLHDLGR;FQLSNSGPNSTIK;GANTHLSTFSFTK;IHFIEAQDLQGK;IHFIEAQDLQGKDTYLK;ISSNPNPVVQMSVGHK;ITVPLVSEVQIAQLR;LEWLTLMPNASNLDK;LIVVVHACR;LLDEWFTLDEVPK;NLIAFSEDGSDPYVR;SFALLLPVYALGYLGLSFSWVLLALALLAWCRR;SIQIHGTMR;TNEPVWEENFTFFIHNPK;VDVGQQPLR;VGNQIFQSR;VLVALASEELAK;VPLSQLLTSEDMTVSQR;VYTENVDKR		669;2544;4052;15053;16105;22849;22850;24990;25290;29178;30688;31066;38204;44682;45459;50418;52731;53472;54920;55468;57191	True;True;True;True;True;True;True;True;True;True;True;True;True;True;True;True;True;True;True;True;True	714;2760;4427;16445;17605;24931;24932;27321;27647;31855;31856;33513;33912;42408;49451;50306;55784;58326;59135;60729;61382;61383;63256	7770;7771;7772;7773;7774;7775;7776;32589;32590;32591;32592;32593;32594;32595;32596;32597;32598;32599;53057;53058;53059;53060;53061;53062;53063;53064;53065;53066;53067;191897;205883;205884;205885;205886;205887;205888;205889;205890;205891;205892;205893;205894;205895;297928;297929;297930;297931;297932;297933;297934;297935;297936;297937;327687;327688;331602;331603;331604;331605;331606;331607;331608;3…	7249;7250;7251;7252;7253;30362;30363;30364;30365;30366;30367;30368;30369;30370;30371;49547;49548;49549;49550;49551;49552;49553;49554;49555;49556;178947;191897;191898;191899;191900;191901;191902;191903;191904;191905;191906;191907;278053;278054;278055;278056;278057;278058;278059;278060;278061;305927;305928;309553;309554;309555;309556;309557;309558;309559;309560;309561;309562;309563;309564;309565;30…	7252;30364;49548;178947;191903;278053;278061;305927;309559;359354;379532;384466;473850;548441;557851;620048;650058;659486;678834;686279;708541	384;385	509;629
240	sp|A0M8Q6|IGLC7_HUMAN	sp|A0M8Q6|IGLC7_HUMAN	Immunoglobulin lambda constant 7 OS=Homo sapiens OX=9606 GN=IGLC7 PE=1 SV=3	3	2	1	1	3	2	1	41.5	27.4	9.4	11.253	106	106	0	36.748	AAPSVTLFPPSSEELQANK;VTHEGSTVEK;YAASSYLSLTPEQWK		450;56308;57837	True;True;False	483;62291;63946	5081;747537;747538;747539;747540;747541;747542;747543;747544;747545;747546;747547;747548;747549;747550;747551;747552;747553;747554;747555;747556;747557;747558;747559;747560;747561;747562;747563;747564;747565;747566;747567;747568;747569;747570;747571;747572;747573;747574;747575;767762;767763;767764;767765;767766;767767	4713;696896;696897;696898;696899;696900;696901;696902;696903;696904;696905;696906;696907;696908;696909;696910;696911;696912;696913;696914;696915;696916;696917;696918;696919;696920;696921;696922;696923;696924;696925;696926;696927;696928;696929;696930;696931;715683;715684;715685;715686	4713;696921;715683
241	sp|A1A4S6|RHG10_HUMAN	sp|A1A4S6|RHG10_HUMAN	Rho GTPase-activating protein 10 OS=Homo sapiens OX=9606 GN=ARHGAP10 PE=1 SV=1	3	3	3	1	3	3	3	4.7	4.7	4.7	89.374	786	786	0.00024349	5.3047	EIMALSVTETLIKPLEK;KFNMIPFEHR;LGDGEVFFLK		10705;26233;29635	True;True;True	11654;28656;32353	137351;137352;344403;344404;344405;344406;391259;391260;391261;391262;391263;391264;391265	128565;128566;321527;321528;365035;365036;365037;365038;365039	128565;321527;365036
242	sp|A1L0T0|HACL2_HUMAN	sp|A1L0T0|HACL2_HUMAN	2-hydroxyacyl-CoA lyase 2 OS=Homo sapiens OX=9606 GN=ILVBL PE=1 SV=2	14	14	14	1	14	14	14	39.1	39.1	39.1	67.867	632	632	0	178.42	AAVETLGVPCFLGGMAR;DGHPVVVNILIGR;EMVPAKPPK;EQVPSLGSNVACGLAYTDYHK;FIFTLVGGHISPLLVACEK;GALQAVDQLSLFRPLCK;HGGENVAAVLR;HKIPVMALVGNDAGWTQISR;LGLFYQLLHK;LSGTVGVAAVTAGPGLTNTVTAVK;LVEGLQGQTWAPDWVEELREADR;NAQMAQSPILLLGGAASTLLQNR;RPLMVLGSQALLTPTSADK;WLDPGAFGTLGVGAGFALGAK		596;7005;11636;12069;14111;16071;20245;20518;29841;33845;34689;37162;43516;57512	True;True;True;True;True;True;True;True;True;True;True;True;True;True	639;7631;12683;13156;15387;17568;22106;22395;32578;36947;37865;41271;41272;48191;63593	6731;6732;6733;6734;6735;6736;6737;6738;6739;6740;6741;90520;90521;90522;90523;90524;90525;90526;90527;90528;90529;90530;90531;90532;90533;90534;90535;90536;90537;148792;153733;179933;179934;179935;179936;179937;179938;179939;179940;179941;179942;179943;179944;179945;179946;179947;179948;179949;179950;179951;205353;205354;205355;205356;205357;205358;205359;205360;205361;205362;205363;205364;20536…	6253;6254;6255;6256;6257;6258;6259;6260;6261;6262;6263;84697;84698;84699;84700;84701;84702;84703;84704;84705;84706;84707;84708;84709;84710;84711;84712;139073;143621;167870;167871;167872;167873;167874;167875;167876;167877;167878;167879;167880;167881;167882;167883;167884;167885;167886;167887;191388;191389;191390;191391;191392;191393;191394;191395;191396;191397;191398;191399;191400;242518;242519;242…	6258;84699;139073;143621;167878;191390;242520;246328;368497;417433;427673;461954;535405;712315	386;387	138;223
243	sp|A1X283|SPD2B_HUMAN	sp|A1X283|SPD2B_HUMAN	SH3 and PX domain-containing protein 2B OS=Homo sapiens OX=9606 GN=SH3PXD2B PE=1 SV=3	7	7	6	1	7	7	6	9.1	9.1	8.2	101.58	911	911	0	18.161	HYVYIIR;IIPFLPGK;LIPIDEYCK;SEGELLER;SFLPGEGPGR;SLLDGEGPQAVGGQDVAFSR;TSNASRPNFLAPLPHEVTQLR		21507;23166;30554;44478;44782;45970;51131	True;True;True;True;True;True;True	23488;25274;33363;49224;49557;50850;56571	280662;302658;404787;586008;586009;589575;589576;606447;673999;674000;674001;674002;674003;674004;674005;674006;674007	262125;282495;377800;546034;549349;549350;565154;628215;628216;628217;628218	262125;282495;377800;546034;549349;565154;628217
245	sp|A2RRP1|NBAS_HUMAN	sp|A2RRP1|NBAS_HUMAN	NBAS subunit of NRZ tethering complex OS=Homo sapiens OX=9606 GN=NBAS PE=1 SV=2	11	11	11	1	11	11	11	5.3	5.3	5.3	268.57	2371	2371	0	9.9948	ELLQYGLK;LHPGDLITVVDAVTFSPK;LLDFTQAQILQGLRK;LLGLAELLR;NQNIVLSAR;QGLYLVTEMER;QVDCALSLIR;SAVNVASIQNYLSK;SLTYLRPLQGQK;VAGENPEER;VLSNTTTTTK		11283;30231;31072;31354;38833;40862;42419;44109;46248;52155;54841	True;True;True;True;True;True;True;True;True;True;True	12263;33013;33919;34218;43125;45335;47023;48827;51155;57700;60640	144523;144524;144525;144526;144527;144528;144529;144530;400204;411995;415622;516292;516293;516294;516295;516296;516297;541108;559665;559666;581587;609675;609676;688735;688736;727068;727069	135132;135133;135134;135135;135136;135137;373560;384503;387953;481678;481679;481680;481681;481682;504499;521566;521567;541954;568119;642017;642018;677894	135132;373560;384503;387953;481681;504499;521566;541954;568119;642017;677894
246	sp|A2RUS2|DEND3_HUMAN	sp|A2RUS2|DEND3_HUMAN	DENN domain-containing protein 3 OS=Homo sapiens OX=9606 GN=DENND3 PE=1 SV=2	5	5	5	1	5	5	5	4.1	4.1	4.1	135.89	1198	1198	0.0042998	2.5916	IPEIHFPLESK;KEVFEANLK;LFEALTVGQEK;SEVYIWSLK;SLQIVLPAR		24250;26153;29244;44659;46141	True;True;True;True;True	26495;28573;31925;49425;51039	317964;317965;317966;343325;385988;588325;608506	296738;320523;360053;548180;567036	296738;320523;360053;548180;567036
247	sp|A3KMH1|VWA8_HUMAN	sp|A3KMH1|VWA8_HUMAN	von Willebrand factor A domain-containing protein 8 OS=Homo sapiens OX=9606 GN=VWA8 PE=1 SV=2	3	3	3	1	3	3	3	1.8	1.8	1.8	214.82	1905	1905	0.0039127	2.6428	FPTEGLSSVVR;NVLPVLNNLLENR;VIALGLPVPR		14966;39357;53732	True;True;True	16352;43710;59420	190906;523181;523182;711424;711425;711426;711427;711428;711429;711430;711431;711432;711433;711434;711435	178056;488042;488043;663292;663293;663294;663295;663296;663297;663298;663299;663300	178056;488042;663296
248	sp|A3KN83|SBNO1_HUMAN	sp|A3KN83|SBNO1_HUMAN	Protein strawberry notch homolog 1 OS=Homo sapiens OX=9606 GN=SBNO1 PE=1 SV=1	4	4	2	1	4	4	2	3.4	3.4	1.5	154.31	1393	1393	0.00025727	6.6887	AGFLIGDGAGVGK;QLSFTGVTFK;TGLAVLELQNK;VVYASATGASEPR		1669;41627;49230;56987	True;True;True;True	1805;46155;54456;63037	20057;20058;20059;550172;550173;648426;648427;648428;757552	18664;18665;512821;604207;604208;604209;706197	18664;512821;604207;706197
249	sp|A4D1E9|GTPBA_HUMAN	sp|A4D1E9|GTPBA_HUMAN	GTP-binding protein 10 OS=Homo sapiens OX=9606 GN=GTPBP10 PE=1 SV=1	4	4	4	1	4	4	4	11.6	11.6	11.6	42.932	387	387	0	7.2588	DFLHLFEK;LLTNFLPLK;PAIADYAFTTLKPELGK;TAFETIILLTK		6847;31979;39625;48298	True;True;True;True	7451;34887;44001;53427	88637;88638;88639;88640;88641;88642;423650;423651;423652;423653;423654;423655;423656;423657;423658;423659;423660;526639;635961;635962;635963;635964;635965;635966;635967;635968	82974;82975;82976;82977;395627;395628;395629;395630;395631;395632;395633;395634;395635;395636;491278;592622;592623;592624;592625;592626;592627	82976;395627;491278;592623
250	sp|A4D1P6|WDR91_HUMAN	sp|A4D1P6|WDR91_HUMAN	WD repeat-containing protein 91 OS=Homo sapiens OX=9606 GN=WDR91 PE=1 SV=2	2	2	2	1	2	2	2	2.5	2.5	2.5	83.343	747	747	0.0079745	2.2625	GFTHTLR;LLLLGSGVGTVR		16902;31569	True;True	18464;34446	216123;418337;418338;418339;418340;418341;418342;418343;418344	201377;390482;390483;390484;390485;390486;390487;390488	201377;390485
251	sp|A5PLL7|PDES1_HUMAN	sp|A5PLL7|PDES1_HUMAN	Plasmanylethanolamine desaturase 1 OS=Homo sapiens OX=9606 GN=PEDS1 PE=1 SV=3	3	3	3	1	3	3	3	13	13	13	31.135	270	270	0.00024102	5.1284	EHHIDPTAITR;WSHTYFGLPR;WVTLLQDWHVILPR		10456;57682;57785	True;True;True	11388;63780;63889	134248;134249;134250;134251;134252;134253;766134;766135;766136;766137;766138;767300;767301	125737;125738;125739;714199;715282;715283	125738;714199;715282
253	sp|A5YKK6|CNOT1_HUMAN	sp|A5YKK6|CNOT1_HUMAN	CCR4-NOT transcription complex subunit 1 OS=Homo sapiens OX=9606 GN=CNOT1 PE=1 SV=2	20	20	20	1	20	20	20	9.6	9.6	9.6	266.94	2376	2376	0	27.663	AAANFSDR;AVQELVHPVVDR;DAIAALGLLQK;DILMDRILPDSGGVAK;EVTAAQVAR;EVTYELDHPGFQIR;GLHNVVYGIQR;GNAPEGLPQLMEVVR;GQQELLYVVPFVAK;IAFIFNNLSQSNMTQK;IVEPPENIQEK;LAEVGQYEQVK;LATEFELRK;LPDPFTPNLK;NLILSAFPR;QLAVYEEFAR;SLDLIESLLR;SLLEVVVLSR;SPVTFLSDLR;TVTVTRPTGVSFK		80;5218;6474;7317;12914;12936;17867;18244;18744;21602;25387;27862;28242;32578;38217;41285;45736;45985;46793;51786	True;True;True;True;True;True;True;True;True;True;True;True;True;True;True;True;True;True;True;True	86;5688;7048;7969;14083;14111;19496;19937;19938;20485;23590;27755;30435;30855;35593;42421;45793;50603;50866;51784;57292	857;858;68085;68086;68087;68088;68089;68090;68091;68092;68093;68094;68095;68096;68097;68098;68099;68100;83845;83846;83847;83848;83849;83850;83851;83852;94868;94869;94870;94871;163978;163979;163980;163981;163982;163983;163984;164233;164234;164235;164236;164237;228643;228644;228645;228646;228647;228648;233514;233515;233516;233517;233518;233519;240282;240283;240284;240285;240286;240287;240288;240289…	806;807;63485;63486;63487;63488;63489;63490;63491;63492;63493;63494;63495;63496;63497;63498;78441;78442;78443;78444;78445;78446;88740;88741;88742;88743;153075;153076;153077;153295;153296;153297;153298;153299;212996;212997;212998;212999;213000;213001;217583;217584;223939;223940;223941;223942;223943;223944;223945;223946;263120;310731;310732;310733;310734;343646;343647;343648;343649;343650;343651;34…	806;63495;78443;88741;153075;153296;212999;217583;223943;263120;310734;343646;348494;403139;473966;509471;561508;565302;574577;637320	389;390	1111;1810
254	sp|Q9GZQ8|MLP3B_HUMAN;sp|A6NCE7|MP3B2_HUMAN	sp|Q9GZQ8|MLP3B_HUMAN;sp|A6NCE7|MP3B2_HUMAN	Microtubule-associated protein 1 light chain 3 beta OS=Homo sapiens OX=9606 GN=MAP1LC3B PE=1 SV=3; Microtubule-associated protein 1 light chain 3 beta 2 OS=Homo sapiens OX=9606 GN=MAP1LC3B2 PE=1 SV=1	5;5	5;5	3;3	2	5	5	3	36.8	36.8	29.6	14.688	125	125;125	0	8.2498	EQHPTKIPVIIER;FLVPDHVNMSELIK;IPVIIER;QLPVLDKTK;TFEQRVEDVR		11963;14698;24390;41561;48984	True;True;True;True;True	13036;16037;16038;26650;46084;54190	152351;152352;152353;152354;152355;187391;187392;187393;187394;187395;187396;187397;187398;187399;187400;187401;187402;187403;187404;187405;187406;187407;187408;187409;187410;187411;187412;187413;187414;187415;187416;187417;187418;187419;187420;187421;187422;187423;187424;187425;187426;187427;187428;187429;187430;187431;187432;187433;187434;187435;187436;187437;187438;187439;187440;187441;187442;…	142310;142311;174737;174738;174739;174740;174741;174742;174743;174744;174745;174746;174747;174748;174749;174750;174751;174752;174753;174754;174755;174756;174757;174758;174759;174760;174761;174762;174763;174764;174765;174766;174767;174768;174769;174770;174771;174772;174773;174774;174775;174776;174777;174778;174779;174780;174781;174782;174783;174784;174785;174786;174787;174788;174789;174790;174791;…	142311;174761;298346;512256;601092	391	60
255	sp|A6NDG6|PGP_HUMAN	sp|A6NDG6|PGP_HUMAN	Glycerol-3-phosphate phosphatase OS=Homo sapiens OX=9606 GN=PGP PE=1 SV=1	10	10	10	1	10	10	10	35.8	35.8	35.8	34.006	321	321	0	49.406	AAAEAGGDDAR;AVEMAAQR;AVVVGFDPHFSYMK;FIAGTGCLVR;FIFDCVSQEYGINPER;GETAVPGAPEALR;LAGAPAPK;LGFITNNSSK;QADIIGKPSR;TILTLTGVSTLGDVK		37;4974;5354;14065;14106;16626;27885;29722;40175;49623	True;True;True;True;True;True;True;True;True;True	39;5421;5840;5841;15340;15382;18169;30460;32448;44588;54882	346;347;348;349;350;351;352;353;354;355;356;357;358;359;360;64848;64849;64850;64851;64852;64853;69522;69523;69524;69525;69526;69527;69528;179432;179433;179434;179435;179436;179437;179438;179439;179440;179441;179910;179911;179912;179913;179914;179915;179916;179917;179918;212338;212339;212340;212341;212342;212343;212344;212345;212346;212347;212348;212349;212350;368694;368695;368696;368697;368698;39…	330;331;332;333;334;335;336;337;338;339;340;341;342;343;344;60436;60437;60438;60439;60440;60441;64793;64794;64795;64796;64797;64798;64799;167414;167415;167416;167417;167418;167419;167420;167421;167422;167852;167853;167854;167855;167856;167857;167858;167859;167860;197810;197811;197812;197813;197814;197815;197816;197817;197818;197819;343886;343887;343888;367015;367016;367017;367018;367019;496843;49…	330;60440;64797;167420;167852;197817;343887;367015;496844;610294	392	179
256	sp|A6NDU8|RIMC1_HUMAN	sp|A6NDU8|RIMC1_HUMAN	RAB7A-interacting MON1-CCZ1 complex subunit 1 OS=Homo sapiens OX=9606 GN=RIMOC1 PE=1 SV=1	5	5	5	1	5	5	5	26.2	26.2	26.2	33.62	294	294	0	105.54	AAAVSSVVR;ELISFLSEPEILVK;HCNLLGDELLECLSWR;QILNFFHHR;RVEELGDLAQAHIQQLSEAAGEDDHFLIR		114;11201;19959;41097;43721	True;True;True;True;True	122;12178;21795;45591;48406	1248;1249;1250;1251;1252;143383;143384;143385;143386;143387;143388;143389;143390;143391;143392;143393;143394;143395;143396;143397;255823;544068;544069;544070;544071;544072;544073;544074;544075;544076;544077;544078;577005;577006;577007	1181;1182;1183;1184;1185;134083;134084;134085;134086;134087;134088;134089;134090;134091;134092;134093;134094;134095;238349;507203;507204;507205;507206;507207;507208;507209;507210;507211;507212;507213;537743;537744;537745	1184;134090;238349;507203;537743
257	sp|A6NHL2|TBAL3_HUMAN	sp|A6NHL2|TBAL3_HUMAN	Tubulin alpha chain-like 3 OS=Homo sapiens OX=9606 GN=TUBAL3 PE=1 SV=2	6	1	1	1	6	1	1	10.5	3.8	3.8	49.908	446	446	0.00045269	3.8702	EDAANNYAR;FDLMYAK;FDLMYAKR;LDHKFDLMYAK;SFGGGTGSGFTSLLMER;YMACCLLYR		9622;13454;13455;28555;44739;59032	False;False;False;False;True;False	10484;14669;14670;14671;14672;31186;31187;49511;49512;65245;65246	124636;124637;124638;124639;124640;124641;124642;124643;124644;124645;124646;124647;124648;124649;124650;124651;124652;124653;124654;124655;124656;124657;124658;124659;124660;124661;124662;124663;124664;124665;124666;124667;124668;124669;124670;124671;124672;124673;124674;171542;171543;171544;171545;171546;171547;171548;171549;171550;171551;377906;377907;377908;377909;377910;377911;377912;377913;…	116821;116822;116823;116824;116825;116826;116827;116828;116829;116830;116831;116832;116833;116834;116835;116836;116837;116838;116839;116840;116841;116842;116843;116844;116845;116846;116847;116848;116849;116850;116851;116852;116853;116854;116855;116856;116857;116858;116859;116860;116861;116862;116863;116864;116865;116866;160148;160149;160150;160151;160152;160153;160154;160155;160156;352693;352694;…	116844;160148;160153;352798;548982;730965	393;394;395	161;320;405
258	sp|A6NHR9|SMHD1_HUMAN	sp|A6NHR9|SMHD1_HUMAN	Structural maintenance of chromosomes flexible hinge domain-containing protein 1 OS=Homo sapiens OX=9606 GN=SMCHD1 PE=1 SV=2	13	13	13	1	13	13	13	7.3	7.3	7.3	226.37	2005	2005	0	14.168	ANLGVFSVFAPR;FSFGLLDLPFR;ITHCPTLLTR;LLLIDWPELK;LMILPDPEKPVR;LQIFSVEGQK;LSEQEELKK;LYFKPIGDPVFAR;QAVFFVGQSAR;SLNSDISYFGVGGK;TLPLFYGSIVR;TTFQENTQSISVR;VQLISGPPAK		3524;15230;25148;31551;32170;33189;33780;35295;40359;46084;50142;51281;55698	True;True;True;True;True;True;True;True;True;True;True;True;True	3857;16639;27494;34426;35116;36241;36879;38515;44784;50979;55455;56735;61635	45466;45467;45468;45469;45470;45471;45472;45473;45474;194035;194036;194037;329709;417924;417925;417926;426303;439018;439019;446192;446193;446194;446195;446196;466429;466430;466431;466432;466433;535009;535010;607964;661698;661699;661700;661701;661702;661703;661704;661705;661706;675779;739530;739531;739532;739533;739534;739535;739536;739537;739538;739539	42261;42262;42263;42264;42265;42266;180885;180886;307786;390097;390098;390099;398149;409972;409973;416582;416583;416584;435469;435470;435471;435472;498885;498886;566564;616699;616700;616701;616702;616703;616704;629857;689496;689497;689498;689499;689500	42265;180885;307786;390098;398149;409973;416584;435470;498886;566564;616699;629857;689497
259	sp|A6NHX0|CAST2_HUMAN;sp|Q8WTX7|CAST1_HUMAN	sp|A6NHX0|CAST2_HUMAN	Cytosolic arginine sensor for mTORC1 subunit 2 OS=Homo sapiens OX=9606 GN=CASTOR2 PE=1 SV=3	4;1	4;1	4;1	2	4	4	4	17	17	17	36.056	329	329;329	0	7.4276	DLPFVTHTLSSEFTILR;ELHILEHR;ESIPLFTYGLIK;FDHALVPEENINGVISALK		7867;11164;12241;13436	True;True;True;True	8560;12140;13342;14650	101882;143019;155543;155544;155545;171409;171410	95273;133764;145265;145266;145267;160030;160031	95273;133764;145267;160031
260	sp|A6NIH7|U119B_HUMAN;sp|Q13432|U119A_HUMAN	sp|A6NIH7|U119B_HUMAN	Protein unc-119 homolog B OS=Homo sapiens OX=9606 GN=UNC119B PE=1 SV=1	5;1	5;1	5;1	2	5	5	5	39.8	39.8	39.8	28.136	251	251;240	0	22.222	AAAAASAAGPGGLVAGKEEK;NTCEHIYEFPQLSEDVIR;QAPHHAADDGVGAAVTEQELLALDTIRPEHVLR;VTENYLCKPEDNIYSIDFTR;YQFTPAFLR		12;39090;40293;56261;59275	True;True;True;True;True	14;43418;44715;62239;65529	152;519602;534091;534092;534093;747037;787566;787567;787568;787569;787570;787571;787572;787573	151;484761;498018;498019;498020;696446;734177;734178;734179;734180;734181;734182;734183	151;484761;498018;696446;734178
261	sp|A6NKT7|RGPD3_HUMAN;sp|Q7Z3J3|RGPD4_HUMAN	sp|A6NKT7|RGPD3_HUMAN;sp|Q7Z3J3|RGPD4_HUMAN	RanBP2-like and GRIP domain-containing protein 3 OS=Homo sapiens OX=9606 GN=RGPD3 PE=1 SV=2; RanBP2-like and GRIP domain-containing protein 4 OS=Homo sapiens OX=9606 GN=RGPD4 PE=1 SV=3	10;9	1;1	1;1	2	10	1	1	6.2	0.7	0.7	197.48	1758	1758;1758	0.00088476	3.5295	EGFSIPVSADGFK;FGISEPGNQEK;IAVAVLEETTR;ILDDSDSNLSVVK;ILQNYDNK;LLLDIPLQTPHK;LLVQHEINTLR;NSIPEPIDPLFK;SVELNPTQK;TFLTNDQTK		10200;13873;21772;23467;23833;31509;32049;38972;47760;49038	False;False;False;True;False;False;False;False;False;False	11107;15128;23772;25595;26002;34383;34961;43285;52833;54250	130996;176687;284157;284158;284159;284160;284161;284162;284163;284164;284165;284166;284167;284168;284169;307327;307328;307329;307330;307331;307332;312583;417482;417483;417484;417485;417486;417487;417488;417489;424569;424570;424571;424572;424573;424574;424575;424576;424577;424578;424579;424580;424581;424582;424583;424584;424585;424586;424587;424588;424589;424590;424591;424592;424593;518113;518114;…	122709;164884;265378;265379;265380;265381;265382;265383;265384;265385;265386;265387;265388;265389;265390;286869;286870;286871;286872;286873;286874;291758;389683;389684;389685;389686;389687;396495;396496;396497;396498;396499;396500;396501;396502;396503;396504;396505;396506;396507;396508;396509;396510;396511;396512;396513;396514;396515;483368;483369;483370;483371;585866;601883	122709;164884;265388;286869;291758;389687;396506;483369;585866;601883
262	sp|A6ZKI3|RTL8C_HUMAN;sp|Q17RB0|RTL8B_HUMAN	sp|A6ZKI3|RTL8C_HUMAN;sp|Q17RB0|RTL8B_HUMAN	Retrotransposon Gag-like protein 8C OS=Homo sapiens OX=9606 GN=RTL8C PE=1 SV=1; Retrotransposon Gag-like protein 8B OS=Homo sapiens OX=9606 GN=RTL8B PE=1 SV=1	2;1	2;1	2;1	2	2	2	2	23	23	23	13.171	113	113;113	0.00023941	4.9706	ALLALPIRPATR;LTGPALQWVIPYIK		2901;34315	True;True	3138;37456	37466;37467;37468;37469;37470;37471;37472;37473;37474;37475;37476;37477;37478;37479;37480;37481;37482;37483;37484;37485;37486;453075;453076;453077	34858;34859;34860;34861;34862;34863;34864;34865;34866;34867;34868;34869;34870;34871;34872;34873;34874;34875;422985;422986;422987	34866;422986
263	sp|P62308|RUXG_HUMAN;sp|A8MWD9|RUXGL_HUMAN	sp|P62308|RUXG_HUMAN;sp|A8MWD9|RUXGL_HUMAN	Small nuclear ribonucleoprotein G OS=Homo sapiens OX=9606 GN=SNRPG PE=1 SV=1; Putative small nuclear ribonucleoprotein G-like protein 15 OS=Homo sapiens OX=9606 GN=SNRPGP15 PE=5 SV=2	3;3	3;3	3;3	2	3	3	3	26.3	26.3	26.3	8.496	76	76;76	0.00023392	4.4678	GNSIIMLEALER;GNSIIMLEALERV;HVQGILR		18327;18328;21379	True;True;True	20026;20027;20028;20029;23351	234577;234578;234579;234580;234581;234582;234583;234584;234585;234586;234587;234588;234589;234590;234591;234592;234593;234594;234595;234596;234597;234598;234599;234600;278591;278592;278593;278594;278595;278596;278597;278598;278599;278600;278601	218592;218593;218594;218595;218596;218597;218598;218599;218600;218601;218602;218603;218604;218605;218606;218607;218608;260157;260158;260159;260160	218597;218607;260159	396	69
264	sp|A9UHW6|MI4GD_HUMAN	sp|A9UHW6|MI4GD_HUMAN	MIF4G domain-containing protein OS=Homo sapiens OX=9606 GN=MIF4GD PE=1 SV=1	3	3	3	1	3	3	3	19.4	19.4	19.4	25.423	222	222	0	7.9111	IQSFDAETQQLLK;TALKDPGAVDLEK;VANVIVDHSLQDCVFSK		24605;48369;52284	True;True;True	26882;53510;57848	322542;322543;322544;322545;322546;322547;637007;637008;637009;637010;637011;637012;637013;637014;637015;690795;690796;690797;690798;690799;690800;690801;690802	301142;301143;301144;593564;593565;593566;593567;593568;593569;593570;643937;643938;643939;643940	301144;593566;643940
265	sp|P0CG08|GPHRB_HUMAN;sp|B7ZAQ6|GPHRA_HUMAN	sp|P0CG08|GPHRB_HUMAN;sp|B7ZAQ6|GPHRA_HUMAN	Golgi pH regulator B OS=Homo sapiens OX=9606 GN=GPR89B PE=1 SV=1; Golgi pH regulator A OS=Homo sapiens OX=9606 GN=GPR89A PE=1 SV=2	5;5	5;5	5;5	2	5	5	5	13.2	13.2	13.2	52.916	455	455;455	0.00024752	5.7373	HGILSIEQLISR;IFMATINIVFDR;LGDPFPILSPK;NVTDTDILALER;QLFLETADLYATK		20263;22439;29647;39428;41386	True;True;True;True;True	22125;24488;32368;43796;45900	260541;260542;260543;260544;260545;260546;260547;260548;292401;292402;292403;292404;292405;292406;292407;292408;292409;292410;292411;292412;391476;524305;524306;524307;524308;524309;547563;547564	242813;242814;242815;242816;242817;242818;272974;272975;272976;272977;272978;272979;272980;272981;365246;489082;489083;489084;489085;489086;510425	242815;272981;365246;489083;510425
266	sp|C4AMC7|WASH3_HUMAN;sp|Q6VEQ5|WASH2_HUMAN;sp|Q9NQA3|WASH6_HUMAN;sp|A8K0Z3|WASH1_HUMAN;sp|A8MWX3|WASH4_HUMAN	sp|C4AMC7|WASH3_HUMAN;sp|Q6VEQ5|WASH2_HUMAN;sp|Q9NQA3|WASH6_HUMAN;sp|A8K0Z3|WASH1_HUMAN	Putative WAS protein family homolog 3 OS=Homo sapiens OX=9606 GN=WASH3P PE=1 SV=2; WAS protein family homolog 2 OS=Homo sapiens OX=9606 GN=WASH2P PE=2 SV=2; WAS protein family homolog 6 OS=Homo sapiens OX=9606 GN=WASH6P PE=1 SV=3; WASH complex subunit 1 O	7;7;5;5;3	7;7;5;5;3	7;7;5;5;3	5	7	7	7	21.8	21.8	21.8	49.994	463	463;465;447;465;477	0	13.393	GPGAGEGPGGAFAR;LFDAPLSISK;LQEYGSIFTGAQDPGLQR;MQHSLAGQTYAVPLIQPDLR;REEAVQQMADALQYLQK;SQVQAIGEK;YVFLDPLAGAVTK		18433;29219;33120;36612;42858;47003;59638	True;True;True;True;True;True;True	20143;31900;36168;40476;47494;52012;65910	236259;236260;236261;236262;236263;385696;438035;486344;486345;486346;565316;565317;565318;619190;619191;619192;619193;791979;791980;791981;791982;791983;791984;791985;791986;791987;791988;791989;791990;791991;791992	220159;220160;220161;359785;409094;453910;526710;576998;576999;738249;738250;738251;738252;738253;738254;738255;738256;738257;738258;738259;738260;738261;738262;738263	220160;359785;409094;453910;526710;576999;738259
267	sp|E9PAV3|NACAM_HUMAN;sp|Q13765|NACA_HUMAN;sp|Q9BZK3|NACP4_HUMAN	sp|E9PAV3|NACAM_HUMAN;sp|Q13765|NACA_HUMAN	Nascent polypeptide-associated complex subunit alpha, muscle-specific form OS=Homo sapiens OX=9606 GN=NACA PE=1 SV=1; Nascent polypeptide-associated complex subunit alpha OS=Homo sapiens OX=9606 GN=NACA PE=1 SV=1	5;5;1	5;5;1	5;5;1	3	5	5	5	3.4	3.4	3.4	205.42	2078	2078;215;213	0	217.7	DIELVMSQANVSR;IEDLSQQAQLAAAEK;NILFVITKPDVYK;NNSNDIVNAIMELTM;SPASDTYIVFGEAK		7249;22124;37878;38591;46571	True;True;True;True;True	7898;7899;24153;42050;42862;42863;51539	94128;94129;94130;94131;94132;94133;94134;94135;94136;94137;94138;94139;94140;94141;94142;94143;94144;94145;94146;94147;94148;94149;94150;94151;94152;94153;94154;94155;94156;94157;94158;94159;288551;288552;288553;288554;288555;288556;288557;288558;288559;288560;288561;288562;288563;288564;288565;288566;288567;288568;288569;288570;288571;288572;288573;288574;288575;288576;288577;288578;288579;5038…	88052;88053;88054;88055;88056;88057;88058;88059;88060;88061;88062;88063;88064;88065;88066;88067;88068;88069;88070;88071;88072;88073;88074;88075;88076;88077;88078;88079;88080;88081;269400;269401;269402;269403;269404;269405;269406;269407;269408;269409;269410;269411;269412;269413;269414;269415;269416;269417;269418;269419;269420;269421;269422;470155;470156;470157;470158;470159;470160;470161;470162;47…	88058;269416;470159;479052;572047	397;398;399	2048;2074;2078
268	sp|E9PRG8|CK098_HUMAN	sp|E9PRG8|CK098_HUMAN	Uncharacterized protein C11orf98 OS=Homo sapiens OX=9606 GN=C11orf98 PE=1 SV=2	3	3	3	1	3	3	3	27.6	27.6	27.6	14.234	123	123	0.00025694	6.6539	TAMEVEAPSKPAR;TSEPQLKR;VVGAVIDQGLITR		48396;51031;56671	True;True;True	53540;56452;62695	637365;637366;672417;672418;672419;672420;672421;672422;753060;753061;753062;753063;753064;753065;753066;753067;753068;753069	593893;593894;626744;626745;626746;626747;626748;702013;702014;702015;702016;702017;702018;702019;702020;702021	593893;626746;702019	400	86
269	sp|L0R6Q1|S35U4_HUMAN	sp|L0R6Q1|S35U4_HUMAN	SLC35A4 upstream open reading frame protein OS=Homo sapiens OX=9606 GN=SLC35A4 PE=1 SV=1	5	5	5	1	5	5	5	58.3	58.3	58.3	11.133	103	103	0	7.5857	ADDKDSLPK;GFLAGYVVAK;NQLESLQR;RVEDEVNSGVGQDGSLLSSPFLK;TLRDYLQLLR		767;16818;38814;43719;50188	True;True;True;True;True	819;18376;43105;48404;55503	9004;215019;215020;215021;215022;215023;215024;215025;215026;215027;215028;215029;516071;516072;516073;516074;516075;516076;516077;516078;516079;516080;516081;516082;577002;577003;662174;662175;662176;662177;662178;662179	8366;200340;200341;200342;200343;200344;200345;200346;200347;200348;200349;481479;481480;481481;481482;481483;481484;481485;481486;481487;537740;537741;617144;617145;617146	8366;200345;481479;537740;617144
270	sp|L0R8F8|MIDUO_HUMAN	sp|L0R8F8|MIDUO_HUMAN	Mitochondrial ribosome and complex I assembly factor AltMIEF1 OS=Homo sapiens OX=9606 GN=MIEF1 PE=1 SV=1	3	3	3	1	3	3	3	40	40	40	8.4447	70	70	0.0023454	3.0217	EAVLSLYR;GLVFLNGK;YTDRDFYFASIR		9531;18113;59536	True;True;True	10385;19764;65802	123170;123171;123172;123173;123174;123175;123176;123177;231381;790534;790535;790536;790537;790538;790539;790540;790541;790542;790543	115378;115379;115380;115381;115382;215513;736913;736914;736915;736916	115381;215513;736913
271	sp|O00115|DNS2A_HUMAN	sp|O00115|DNS2A_HUMAN	Deoxyribonuclease-2-alpha OS=Homo sapiens OX=9606 GN=DNASE2 PE=1 SV=2	3	3	3	1	3	3	3	8.9	8.9	8.9	39.58	360	360	0	19.467	AFQPLVK;GGGTLCAQLPALWK;GPWTCVGDMNR		1500;17015;18623	True;True;True	1620;18587;20351	17688;217373;217374;217375;217376;217377;217378;217379;217380;217381;217382;217383;238707;238708;238709;238710;238711	16424;202547;202548;202549;202550;202551;202552;202553;202554;202555;202556;202557;222473;222474;222475;222476;222477	16424;202556;222473
272	sp|O00116|ADAS_HUMAN	sp|O00116|ADAS_HUMAN	Alkyldihydroxyacetonephosphate synthase, peroxisomal OS=Homo sapiens OX=9606 GN=AGPS PE=1 SV=1	13	13	13	1	13	13	13	30.7	30.7	30.7	72.911	658	658	0	57.799	AHGHCLHEIFLLR;ASLNPSDTPPSVVNEDFLHDLK;EYVDPNNIFGNR;GFDPNQLSVATLLFEGDREK;GISDPLTVFEQTEAAAR;GYLLTYVIAYIR;IPDIVLWPTCHDDVVK;KNIYGNIEDLVVHIK;MSTGPDIHHFIMGSEGTLGVITEATIK;NIYGNIEDLVVHIK;QFQFGHALKPQVSSIFTSFLDGLK;TIISLDTSQMNR;YPLSGMGLPTFK		1979;4394;13120;16700;17491;19774;24229;26991;36751;37980;40747;49586;59209	True;True;True;True;True;True;True;True;True;True;True;True;True	2139;4792;14305;18245;19106;21601;26472;29491;40690;42163;45213;54840;65460	24704;24705;24706;57735;57736;166553;166554;166555;213231;213232;213233;213234;213235;213236;213237;213238;213239;213240;224009;224010;224011;224012;224013;224014;224015;224016;224017;224018;224019;253841;253842;253843;253844;253845;253846;317766;317767;317768;317769;317770;317771;317772;317773;354933;488454;504999;505000;505001;505002;505003;505004;505005;505006;505007;505008;505009;505010;50501…	23054;53861;155492;198647;198648;198649;198650;198651;198652;198653;198654;198655;208728;208729;208730;208731;208732;208733;208734;208735;208736;208737;208738;236470;236471;236472;296554;296555;296556;296557;296558;331071;455858;471167;471168;471169;471170;471171;471172;471173;471174;471175;471176;471177;471178;471179;503104;609859;609860;733601;733602	23054;53861;155492;198651;208728;236470;296556;331071;455858;471179;503104;609860;733602
273	sp|O00139|KIF2A_HUMAN	sp|O00139|KIF2A_HUMAN	Kinesin-like protein KIF2A OS=Homo sapiens OX=9606 GN=KIF2A PE=1 SV=3	17	17	17	1	17	17	17	21.5	21.5	21.5	79.954	706	706	0	31.914	AALQEEEQASK;AVFQESIR;DLDVITIPSK;DLDVITIPSKDVVMVHEPK;FSLIDLAGNER;GSLDYRPLTTADPIDEHR;IDILTELR;IDILTELRDK;LEGAEINK;LIDIGNSCR;LQQQELR;PLVETIFER;QQVQVVGLQER;SHAVFQIILR;VFDLLNR;VLEDGKQQVQVVGLQER;YLENQTFR		362;5018;7615;7616;15299;18983;21965;21966;28929;30340;33359;39932;42102;45180;53067;54333;58823	True;True;True;True;True;True;True;True;True;True;True;True;True;True;True;True;True	387;5467;8289;8290;16719;20740;23982;23983;31588;33130;36429;44320;46686;49998;58686;60087;65019	3989;3990;3991;3992;3993;3994;65475;65476;65477;65478;65479;98543;98544;98545;98546;195034;195035;195036;195037;195038;195039;195040;195041;195042;195043;195044;195045;195046;243052;243053;243054;286619;286620;286621;286622;286623;286624;286625;286626;286627;286628;286629;286630;382257;402198;441306;441307;441308;441309;441310;441311;441312;441313;441314;441315;441316;529922;529923;529924;529925;…	3703;3704;3705;3706;3707;3708;61051;61052;92149;92150;92151;92152;181813;181814;181815;181816;181817;181818;181819;181820;181821;181822;181823;181824;181825;181826;226447;226448;267618;267619;267620;267621;267622;267623;267624;267625;267626;267627;356660;375431;412107;412108;412109;412110;412111;412112;412113;412114;412115;494241;494242;494243;494244;494245;517952;554433;554434;554435;554436;5544…	3703;61051;92149;92152;181817;226448;267618;267627;356660;375431;412108;494241;517952;554435;654120;672027;728538
274	sp|O00142|KITM_HUMAN	sp|O00142|KITM_HUMAN	Thymidine kinase 2, mitochondrial OS=Homo sapiens OX=9606 GN=TK2 PE=1 SV=4	4	4	4	1	4	4	4	22.3	22.3	22.3	31.004	265	265	0.00045683	4	GSLFPMAAPVLVIEADHHMER;MLELFEQNR;VIPLEYLEAIHHLHEEWLIK;YIFVENLYR		18987;36260;53944;58625	True;True;True;True	20744;39917;39918;59664;64808	243079;243080;480877;480878;480879;480880;714715;778773	226472;448813;448814;448815;448816;666454;725979	226472;448816;666454;725979
275	sp|O00148|DX39A_HUMAN	sp|O00148|DX39A_HUMAN	ATP-dependent RNA helicase DDX39A OS=Homo sapiens OX=9606 GN=DDX39A PE=1 SV=2	18	8	8	1	18	8	8	47.5	22.7	22.7	49.129	427	427	0	154.2	AIVDCGFEHPSEVQHECIPQAILGMDVLCQAK;CMALAQLLVEQNFPAIAIHR;DFLLKPELLR;DIRPVCR;DVQEIFR;GLAITFVSDENDAK;GSYVSIHSSGFR;HFVLDECDK;HFVLDECDKMLEQLDMR;ILNDVQDR;ILVATNLFGR;LTLHGLQQYYVK;MLEQLDMR;NCPHVVVGTPGR;QCMMFSATLSK;RILVATNLFGR;VNIVFNYDMPEDSDTYLHR;VSVFFGGLSIK		2367;6036;6851;7377;8919;17673;19141;20202;20203;23746;23917;34367;36264;37235;40395;43122;55201;56145	False;True;False;True;False;False;False;True;True;False;False;False;False;True;True;False;True;True	2566;2567;6569;6570;7456;8034;9713;19298;20909;22062;22063;25908;26090;37509;39925;41358;44822;47772;61084;62118	30474;30475;30476;30477;30478;30479;30480;30481;30482;30483;30484;30485;30486;30487;30488;30489;30490;30491;30492;30493;30494;30495;30496;30497;78167;78168;78169;78170;78171;78172;78173;78174;78175;78176;78177;78178;78179;78180;78181;78182;78183;78184;88678;88679;88680;88681;88682;88683;88684;88685;88686;88687;88688;88689;88690;88691;88692;88693;88694;88695;88696;88697;88698;88699;88700;88701;955…	28473;28474;28475;28476;28477;28478;28479;28480;28481;28482;28483;28484;28485;28486;28487;28488;28489;28490;28491;28492;28493;28494;28495;28496;72869;72870;72871;72872;72873;72874;72875;72876;72877;72878;72879;72880;72881;72882;72883;72884;72885;72886;83011;83012;83013;83014;83015;83016;83017;83018;83019;83020;83021;83022;83023;83024;83025;83026;83027;83028;83029;83030;83031;83032;89412;89413;894…	28486;72869;83016;89415;108040;210785;228241;242046;242047;290803;292592;423509;448852;463050;499219;530896;682780;695022	401;402	82;300
276	sp|O00151|PDLI1_HUMAN	sp|O00151|PDLI1_HUMAN	PDZ and LIM domain protein 1 OS=Homo sapiens OX=9606 GN=PDLIM1 PE=1 SV=4	20	20	20	1	20	20	20	77.5	77.5	77.5	36.071	329	329	0	323.31	AALANLCIGDVITAIDGENTSNMTHLEAQNR;CGTGIVGVFVK;DFEQPLAISR;ERVTPPEGYEVVTVFPK;GCTDNLTLTVAR;GHFFVEDQIYCEK;HRHPECYVCTDCGTNLK;IKGCTDNLTLTVAR;LVGGKDFEQPLAISR;MNLASEPQEVLHIGSAHNR;QELNEPPK;QSTSFLVLQEILESEEK;SAMPFTASPASSTTAR;TAASGVEANSR;TTQQIDLQGPGPWGFR;VAASIGNAQK;VITNQYNNPAGLYSSENISNFNNALESK;VTPPEGYEVVTVFPK;VWSPLVTEEGK;VWSPLVTEEGKR		308;5835;6804;12148;16270;17204;21065;23325;34751;36486;40597;42261;44016;48244;51387;52046;54016;56399;57055;57056	True;True;True;True;True;True;True;True;True;True;True;True;True;True;True;True;True;True;True;True	327;328;6355;7405;13241;17783;18790;23008;25443;37930;40273;40274;45047;46853;48726;48727;53369;56858;57576;59743;62393;63112;63113	3431;3432;3433;3434;3435;3436;3437;3438;3439;3440;3441;3442;3443;75911;75912;75913;75914;75915;75916;75917;75918;75919;75920;75921;75922;75923;75924;87887;87888;87889;87890;87891;87892;87893;87894;87895;87896;87897;87898;87899;87900;87901;87902;87903;154546;154547;154548;154549;154550;154551;154552;154553;154554;154555;154556;207966;207967;207968;207969;207970;207971;207972;207973;207974;207975;2…	3176;3177;3178;3179;3180;3181;3182;3183;3184;3185;3186;3187;3188;3189;70781;70782;70783;70784;70785;70786;70787;70788;70789;70790;82266;82267;82268;82269;82270;82271;82272;82273;82274;82275;82276;82277;82278;82279;82280;82281;144359;144360;144361;144362;144363;144364;144365;144366;144367;144368;144369;193811;193812;193813;193814;193815;193816;193817;193818;193819;193820;193821;193822;193823;19382…	3179;70788;82277;144366;193828;204714;254217;285010;428326;451861;501459;519447;541118;592124;631707;640541;667536;698265;706869;706875	403;404;405	61;104;125
277	sp|O00154|BACH_HUMAN;sp|Q6ZUV0|BACHL_HUMAN	sp|O00154|BACH_HUMAN	Cytosolic acyl coenzyme A thioester hydrolase OS=Homo sapiens OX=9606 GN=ACOT7 PE=1 SV=3	18;2	18;2	18;2	2	18	18	18	50.3	50.3	50.3	41.796	380	380;252	0	227.99	AASAFFTYVSLSQEGR;ATLWYVPLSLK;CVAALAR;GCVITISGR;HSVEVQVNVMSENILTGAK;IMRPDDANVAGNVHGGTILK;KGCVITISGR;LMDEVAGIVAAR;MIEEAGAIISTR;MTFTSNK;NVDKVLEVPPVVYSR;SLPVPQLVPETEDEK;SLPVPQLVPETEDEKK;SMEIEVLVDADPVVDSSQKR;TNIVTASVDAINFHDK;TNIVTASVDAINFHDKIR;VLEVPPVVYSR;YEAQKLER		501;4728;6280;16274;21189;24052;26276;32123;36098;36792;39243;46120;46121;46332;50446;50447;54406;58099	True;True;True;True;True;True;True;True;True;True;True;True;True;True;True;True;True;True	535;5158;6843;17788;23146;23147;26270;26271;28703;35044;35045;39660;39661;40748;43587;51016;51017;51248;55816;55817;60163;64237	5642;5643;5644;5645;5646;5647;5648;5649;5650;5651;5652;5653;5654;5655;5656;5657;5658;61602;61603;61604;61605;61606;61607;61608;61609;61610;61611;61612;61613;61614;61615;61616;61617;61618;61619;61620;61621;61622;61623;61624;61625;61626;61627;61628;81148;208014;208015;208016;208017;208018;208019;208020;208021;208022;208023;208024;208025;274482;274483;315611;315612;315613;315614;315615;315616;315617…	5241;5242;5243;5244;5245;5246;5247;5248;5249;5250;5251;5252;5253;5254;5255;5256;5257;57397;57398;57399;57400;57401;57402;57403;57404;57405;57406;57407;57408;57409;57410;57411;57412;57413;57414;57415;57416;57417;75709;193857;193858;193859;193860;193861;193862;193863;193864;193865;193866;193867;193868;255950;255951;294571;294572;294573;294574;294575;294576;294577;294578;294579;294580;294581;294582;…	5251;57413;75709;193862;255950;294597;321978;397463;446342;456336;486708;566782;566795;569205;620377;620407;672761;718985	406;407;408;409;410	60;79;143;254;304
278	sp|O00159|MYO1C_HUMAN	sp|O00159|MYO1C_HUMAN	Unconventional myosin-Ic OS=Homo sapiens OX=9606 GN=MYO1C PE=1 SV=4	69	69	68	1	69	69	68	64.2	64.2	64.2	121.68	1063	1063	0	323.31	AVASEIFK;CPENAFFLDHVR;DGTIDFTPGSELLITK;DLQIYSR;DNYPQSVPR;DQAVMISGESGAGK;DRLLQSNPVLEAFGNAK;DVESPSWR;EASELLR;ENLIYTYIGPVLVSVNPYR;FDEVLIR;FRENLIYTYIGPVLVSVNPYR;GAPVGGHILSYLLEK;GDVVLQSDHVIETLTK;GEELLSPLNLEQAAYAR;GIISILDEECLRPGEATDLTFLEK;GVSFYEVPPHLFAVADTVYR;HLGYKPEEYK;IDYANLTGISVSSLSDSLFVLHVQR;IFIRFPK;IIAKGEELLSPLNLEQAAYAR;IICDLVEEK;IICDLVEEKFK;KDNYPQSVPR;KYEAFLQR;LGTDEISPR;LLHYAGEVTYSVTGFLDK;LLHYAGE…		4888;6095;7093;7892;8175;8284;8420;8808;9462;11715;13424;15135;16124;16456;16498;17405;19553;20630;22088;22421;22956;22977;22978;26012;27613;30018;31430;31431;31792;31828;31936;33348;36717;36718;37512;37513;37632;38230;38516;38683;38727;39983;41205;41490;41491;41555;41886;42129;42841;43457;43951;44594;45697;45698;49104;49941;49942;51049;51050;53559;54741;54742;55272;56119;56372;57234;58097;58855;…	True;True;True;True;True;True;True;True;True;True;True;True;True;True;True;True;True;True;True;True;True;True;True;True;True;True;True;True;True;True;True;True;True;True;True;True;True;True;True;True;True;True;True;True;True;True;True;True;True;True;True;True;True;True;True;True;True;True;True;True;True;True;True;True;True;True;True;True;True	5324;6643;7727;8585;8925;9039;9040;9182;9594;10310;12769;14637;16538;17624;17987;18030;19012;21366;22519;24115;24469;25042;25068;25069;28427;30159;32777;34297;34298;34682;34721;34840;36416;40634;40635;40636;41655;41656;41782;42435;42780;42962;42963;43009;44379;45708;46009;46010;46078;46458;46714;47475;48125;48657;49355;50562;50563;54322;55228;55229;56472;56473;59228;60528;60529;61164;62092;62359;…	63477;79115;79116;79117;79118;79119;79120;79121;79122;79123;79124;79125;79126;79127;79128;79129;79130;79131;79132;79133;79134;79135;79136;79137;79138;79139;79140;79141;79142;79143;79144;79145;79146;79147;79148;79149;79150;79151;79152;79153;91729;91730;91731;91732;91733;91734;91735;91736;91737;91738;91739;91740;91741;91742;91743;91744;91745;91746;91747;102164;102165;102166;102167;102168;102169;102…	59129;73817;73818;73819;73820;73821;73822;73823;73824;73825;73826;73827;73828;73829;73830;73831;73832;73833;73834;73835;73836;73837;73838;73839;73840;73841;73842;73843;73844;73845;73846;73847;73848;73849;73850;73851;73852;73853;73854;73855;85830;85831;85832;85833;85834;85835;85836;85837;85838;85839;85840;85841;85842;85843;85844;85845;85846;85847;85848;95541;95542;95543;95544;95545;99671;99672;996…	59129;73820;85848;95542;99671;100821;102137;106900;114538;139901;159837;179902;192058;195920;196506;207429;233493;247724;268941;272804;279408;279772;279793;318827;340638;370666;388924;388932;393691;394052;395171;412027;455449;455488;466257;466276;467471;474045;478133;480087;480534;494843;508487;511516;511541;512188;515610;518249;526575;534653;540493;547598;561021;561037;602670;614372;614386;62704…	411;412;413;414;415	36;137;202;582;606
279	sp|O00161|SNP23_HUMAN	sp|O00161|SNP23_HUMAN	Synaptosomal-associated protein 23 OS=Homo sapiens OX=9606 GN=SNAP23 PE=1 SV=1	4	4	4	1	4	4	4	29.9	29.9	29.9	23.354	211	211	0	26.208	AHQITDESLESTRR;IEEGLDQINK;ILGLAIESQDAGIK;ITNDAREDEMEENLTQVGSILGNLK		2016;22149;23603;25206	True;True;True;True	2179;24178;25739;27558;27559	25276;25277;25278;25279;25280;25281;25282;25283;25284;288858;288859;288860;288861;288862;288863;288864;288865;288866;288867;308977;308978;308979;308980;308981;308982;308983;308984;308985;308986;308987;308988;308989;308990;308991;308992;330564;330565;330566;330567;330568;330569	23567;23568;23569;23570;23571;23572;23573;23574;23575;269691;269692;269693;269694;269695;269696;269697;269698;269699;269700;288393;288394;288395;288396;288397;288398;288399;288400;288401;288402;288403;288404;288405;288406;288407;288408;308597;308598;308599;308600;308601;308602	23567;269695;288394;308597	416	152
280	sp|O00165|HAX1_HUMAN	sp|O00165|HAX1_HUMAN	HCLS1-associated protein X-1 OS=Homo sapiens OX=9606 GN=HAX1 PE=1 SV=2	4	4	4	1	4	4	4	12.5	12.5	12.5	31.62	279	279	0.0013072	3.3131	GFFGFPGPR;IFGGVLESDAR;SLFDLFR;YPDSHQPR		16733;22399;45827;59167	True;True;True;True	18282;24446;50700;65412	213634;213635;213636;213637;213638;291823;291824;291825;291826;291827;603654;603655;786075	199036;199037;199038;272439;272440;272441;272442;272443;562440;732734	199036;272440;562440;732734
281	sp|O00170|AIP_HUMAN	sp|O00170|AIP_HUMAN	AH receptor-interacting protein OS=Homo sapiens OX=9606 GN=AIP PE=1 SV=3	15	15	15	1	15	15	15	57.6	57.6	57.6	37.664	330	330	0	66.914	AHAAVWNAQEAQADFAK;AVPLIHQEGNR;EGEIAQFLCDIK;EHSSLGHADLDALQQNPQPLIFHMEMLK;FKLPVWETIVCTMR;GELPDFQDGTK;HCCGVAQMR;HVVLYPLVAK;LPVWETIVCTMR;LREDGIQK;LVVEEYYEVLDHCSSILNK;NIAVGKDPLEGQR;TLHSDDEGTVLDDSR;VLELDPALAPVVSR;YYDAIACLK		1954;5195;10180;10512;14300;16566;19946;21412;32928;33521;35091;37779;50000;54366;59752	True;True;True;True;True;True;True;True;True;True;True;True;True;True;True	2113;5663;11086;11451;15593;18101;21781;23387;35963;36601;38298;41945;55297;60122;66032	24349;24350;24351;24352;24353;24354;24355;24356;67870;67871;67872;67873;67874;67875;67876;67877;67878;67879;67880;67881;67882;67883;67884;67885;67886;67887;67888;67889;67890;67891;67892;130808;130809;130810;130811;130812;130813;130814;130815;130816;130817;130818;130819;130820;130821;135127;135128;135129;135130;135131;135132;135133;135134;135135;135136;135137;135138;182572;211663;211664;211665;211…	22718;22719;22720;22721;22722;22723;22724;22725;22726;63269;63270;63271;63272;63273;63274;63275;63276;63277;63278;63279;63280;63281;63282;63283;63284;63285;63286;63287;63288;63289;63290;63291;122540;122541;122542;122543;122544;122545;122546;122547;122548;122549;122550;122551;122552;122553;126548;126549;126550;126551;126552;126553;126554;126555;126556;126557;126558;170351;197202;197203;197204;1972…	22721;63289;122540;126552;170351;197202;238258;260560;406879;413923;433594;468989;615050;672437;739362
282	sp|O00178|GTPB1_HUMAN	sp|O00178|GTPB1_HUMAN	GTP-binding protein 1 OS=Homo sapiens OX=9606 GN=GTPBP1 PE=1 SV=3	7	7	7	1	7	7	7	13.9	13.9	13.9	72.453	669	669	0	13.821	LNPQASWEFEAEILVLHHPTTISPR;LVLVSPTSEQYDSLLR;MFLNLLSPR;TPEYLHIDQR;VAVVGNVDAGK;VGDNDFLEVR;VITFIDLAGHEK		32423;34885;35899;50583;52420;53310;54010	True;True;True;True;True;True;True	35421;38069;39357;55963;57997;58956;59735	429746;460827;460828;460829;460830;460831;460832;460833;460834;460835;460836;460837;475126;475127;475128;475129;475130;475131;475132;475133;475134;475135;475136;667394;667395;667396;667397;667398;667399;693341;693342;693343;693344;693345;704689;704690;715748;715749;715750;715751;715752;715753;715754;715755;715756;715757	401348;430159;430160;430161;430162;430163;430164;430165;430166;430167;443527;443528;443529;443530;443531;443532;443533;443534;443535;443536;622081;622082;622083;622084;622085;622086;646452;646453;656974;656975;667435;667436;667437;667438;667439;667440;667441;667442;667443;667444	401348;430164;443533;622086;646452;656974;667435
283	sp|O00186|STXB3_HUMAN	sp|O00186|STXB3_HUMAN	Syntaxin-binding protein 3 OS=Homo sapiens OX=9606 GN=STXBP3 PE=1 SV=2	8	8	8	1	8	8	8	13.9	13.9	13.9	67.764	592	592	0	12.382	ALYFITPTSK;HIAVVLEEIPK;IENESDMIR;IMLLDEFTTK;SAEETFQLSR;SVDCFLHDFASK;TSLSALTQLMK;VLLPVLLNK		3315;20397;22239;24022;43891;47723;51116;54626	True;True;True;True;True;True;True;True	3591;22269;24270;26225;48590;52793;56547;60402	43058;43059;43060;43061;43062;43063;43064;262627;262628;262629;262630;262631;262632;262633;262634;262635;262636;262637;262638;289923;315139;315140;315141;315142;315143;315144;315145;315146;315147;315148;315149;315150;315151;315152;579132;579133;579134;628386;673734;673735;673736;673737;673738;673739;724094;724095;724096;724097;724098;724099;724100;724101;724102;724103;724104;724105;724106;724107;…	40091;40092;40093;40094;40095;244797;244798;244799;244800;244801;244802;244803;244804;244805;244806;244807;270692;294118;294119;294120;294121;294122;294123;294124;294125;294126;294127;294128;294129;294130;539701;539702;539703;585504;627993;627994;627995;627996;675117;675118;675119;675120;675121;675122;675123;675124;675125;675126;675127;675128;675129;675130;675131;675132;675133	40091;244804;270692;294119;539703;585504;627994;675132
284	sp|O00194|RB27B_HUMAN	sp|O00194|RB27B_HUMAN	Ras-related protein Rab-27B OS=Homo sapiens OX=9606 GN=RAB27B PE=1 SV=4	5	5	3	1	5	5	3	19.7	19.7	11.5	24.608	218	218	0	7.5211	AVETLLDLIMK;AVETLLDLIMKR;FITTVGIDFR;SLTTAFFR;VHLQLWDTAGQER		4983;4984;14236;46245;53652	True;True;True;True;True	5431;5432;5433;15521;51151;59328	64920;64921;64922;64923;64924;64925;64926;64927;64928;64929;64930;181601;609645;609646;609647;609648;609649;609650;609651;609652;609653;709781;709782;709783;709784	60500;60501;60502;60503;60504;60505;60506;60507;60508;60509;169416;568090;568091;568092;568093;568094;568095;568096;568097;661725;661726	60501;60508;169416;568092;661725	417	182
285	sp|O00203|AP3B1_HUMAN;sp|Q13367|AP3B2_HUMAN	sp|O00203|AP3B1_HUMAN	AP-3 complex subunit beta-1 OS=Homo sapiens OX=9606 GN=AP3B1 PE=1 SV=3	48;11	48;11	48;11	2	48	48	48	46.3	46.3	46.3	121.32	1094	1094;1082	0	247.79	ALKDPNQLIR;ASILWLIGENCER;ATGYLELSNWPEVAPDPSVR;DHFQLGTLSHTLNIK;DRDHFQLGTLSHTLNIK;EASADLSPYVR;EGSTAQLIINTEK;ELKPVLSQG;EMLIEVIEK;EQGVLTGMNETSAVIIAAPQNFTPSVIFQK;EVQYIVLQNIATMSIQR;GLAAHYFFPR;IAPDVLR;IAPDVLRK;IFLAQKPAPLLESPFK;IVGMIAK;KGMFEPYLK;KIENIHIGEK;KLLQMQPAQHGEIIK;KLVYVYLVR;LEILTNLANEANISTLLR;LLDSITVPVAR;LLQMQPAQHGEIIK;LLTQYILNLGK;LQILNLGAK;LVYVYLVR;LYSLDPEQK;LYSLDPEQKEMLIEVIEK;NAAVVMAVAQLYWHISPK…		2888;4349;4676;7151;8392;9457;10378;11223;11606;11956;12894;17662;21682;21683;22422;25427;26360;26502;26795;26916;28997;31121;31811;31987;33193;35136;35442;35443;37023;37167;39139;39233;39272;40672;41865;44839;44840;46835;47571;50030;50830;51601;51617;54849;55424;56829;57864;58075	True;True;True;True;True;True;True;True;True;True;True;True;True;True;True;True;True;True;True;True;True;True;True;True;True;True;True;True;True;True;True;True;True;True;True;True;True;True;True;True;True;True;True;True;True;True;True;True	3125;4746;5105;7793;9154;10305;11302;12200;12636;12637;13028;13029;14062;14063;19287;23675;23676;24470;27799;28793;28952;29270;29400;31657;33971;34702;34703;34896;36245;38351;38674;38675;41122;41278;43469;43577;43620;45127;46437;49618;49619;51829;52625;55331;56240;57084;57085;57103;60649;60650;61333;61334;61335;62865;63973;64212	37306;37307;37308;37309;37310;37311;37312;37313;37314;37315;37316;37317;37318;37319;37320;37321;37322;37323;37324;37325;37326;37327;57233;57234;57235;57236;57237;57238;57239;57240;57241;57242;57243;57244;57245;57246;57247;57248;57249;57250;57251;61054;61055;61056;61057;61058;61059;61060;61061;61062;92692;92693;92694;92695;92696;92697;108747;108748;108749;108750;108751;108752;108753;108754;108755;…	34710;34711;34712;34713;34714;34715;34716;34717;34718;34719;34720;34721;34722;34723;34724;34725;34726;34727;34728;34729;53401;53402;53403;53404;53405;53406;53407;53408;53409;53410;53411;53412;53413;53414;53415;53416;53417;53418;53419;53420;56916;56917;56918;56919;56920;56921;56922;56923;86719;86720;86721;86722;101867;101868;101869;101870;101871;101872;101873;101874;101875;101876;101877;101878;101…	34717;53413;56920;86719;101879;114467;124643;134477;138667;142279;152771;210664;264310;264313;272808;311261;322951;325025;328854;330176;357381;385180;393869;395727;410041;434230;436983;436987;460226;462052;485417;486609;487050;502376;515429;549898;549901;575099;583625;615384;624620;634281;634541;678012;685650;704361;715960;718761	418;419;420;421;422;423;424	151;152;187;360;471;1003;1056
286	sp|O00213|APBB1_HUMAN	sp|O00213|APBB1_HUMAN	Amyloid beta precursor protein binding family B member 1 OS=Homo sapiens OX=9606 GN=APBB1 PE=1 SV=2	2	2	2	1	2	2	2	4.6	4.6	4.6	77.243	710	710	0	20.101	LVDVPFQVEFPAPK;LVEPQSQALLHAQPIISIR		34668;34707	True;True	37841;37883	457880;457881;457882;457883;457884;457885;457886;458415;458416	427400;427401;427402;427403;427404;427405;427887;427888	427402;427887
287	sp|O00214|LEG8_HUMAN	sp|O00214|LEG8_HUMAN	Galectin-8 OS=Homo sapiens OX=9606 GN=LGALS8 PE=1 SV=4	7	7	7	1	7	7	7	18	18	18	35.808	317	317	0	9.149	ADVAFHFNPR;DIALHLNPR;HTLLYGHR;IDTLGIYGK;LNTPMGPGR;SFNVDLLAGK;SKDIALHLNPR		964;7215;21244;22070;32492;44798;45552	True;True;True;True;True;True;True	1042;7862;23206;24096;35499;49576;50404	11251;11252;11253;11254;11255;11256;11257;11258;11259;11260;11261;11262;11263;11264;93562;276325;276326;276327;276328;287836;287837;287838;287839;430693;430694;430695;430696;589715;589716;589717;589718;589719;589720;589721;589722;600187;600188;600189;600190;600191;600192	10412;10413;10414;10415;10416;10417;10418;10419;10420;10421;10422;10423;10424;87498;258021;258022;258023;268738;268739;268740;268741;402223;402224;402225;549479;549480;549481;549482;549483;549484;549485;549486;559261;559262;559263;559264;559265;559266	10414;87498;258023;268738;402223;549482;559261
288	sp|O00217|NDUS8_HUMAN	sp|O00217|NDUS8_HUMAN	NADH dehydrogenase [ubiquinone] iron-sulfur protein 8, mitochondrial OS=Homo sapiens OX=9606 GN=NDUFS8 PE=1 SV=1	6	6	6	1	6	6	6	32.9	32.9	32.9	23.705	210	210	0	14.569	EPATINYPFEK;FRGEHALR;GLGMTLSYLFR;LCEAICPAQAITIEAEPR;TLLWTELFR;YVNMQDPEMDMK		11802;15140;17843;28349;50094;59674	True;True;True;True;True;True	12867;16543;19471;19472;30969;55395;65951	150660;150661;150662;150663;150664;150665;150666;150667;150668;150669;150670;150671;150672;150673;150674;150675;193017;193018;193019;228194;228195;228196;228197;228198;228199;228200;228201;375176;375177;375178;375179;375180;375181;375182;375183;375184;375185;375186;375187;660922;660923;660924;660925;660926;660927;660928;660929;660930;660931;660932;792399;792400;792401;792402;792403	140800;140801;140802;140803;140804;140805;140806;140807;140808;140809;140810;140811;140812;140813;140814;140815;179956;179957;179958;212536;212537;212538;212539;212540;349898;349899;349900;349901;349902;349903;349904;349905;349906;349907;349908;349909;615975;615976;615977;615978;615979;615980;615981;615982;615983;738634;738635	140803;179956;212536;349904;615976;738634	425	70
289	sp|O00231|PSD11_HUMAN	sp|O00231|PSD11_HUMAN	26S proteasome non-ATPase regulatory subunit 11 OS=Homo sapiens OX=9606 GN=PSMD11 PE=1 SV=3	29	29	29	1	29	29	29	69.2	69.2	69.2	47.463	422	422	0	229.3	AAAAVVEFQR;AELRDDPIISTHLAK;ALLVEVQLLESK;AQSLLSTDR;AQSLLSTDREASIDILHSIVK;DDPIISTHLAK;DIQENDEEAVQVK;EASIDILHSIVK;EASIDILHSIVKR;EQSILELGSLLAK;FHGILDQGEGVLIIFDEPPVDK;IMLNTPEDVQALVSGK;KLSQMILDK;LQATLDMQSGIIHAAEEKDWK;LVSLYFDTK;LVSLYFDTKR;LYDNLLEQNLIR;RYQEALHLGSQLLR;TAYSYFYEAFEGYDSIDSPK;TGQAAELGGLLK;TTANAIYCPPK;TTANAIYCPPKLQATLDMQSGIIHAAEEK;TYEAALETIQNMSK;TYHALSNLPK;VIEPFSR;VQIEHISSLIK;VVDSLYNK;YQEALHLG…		30;1177;2995;4097;4098;6690;7355;9468;9469;12045;14013;24025;26866;32994;35039;35040;35274;43831;48510;49280;51240;51241;51888;51919;53793;55680;56614;59259;59682	True;True;True;True;True;True;True;True;True;True;True;True;True;True;True;True;True;True;True;True;True;True;True;True;True;True;True;True;True	32;1265;3239;4474;4475;7286;8011;10316;10317;13130;15283;26228;26229;29347;36031;38239;38240;38493;48526;53669;54507;56688;56689;57399;57431;59485;61614;62634;65512;65959	272;273;274;275;276;277;278;279;280;281;282;283;284;285;286;287;288;289;290;13762;13763;13764;13765;13766;13767;13768;13769;13770;13771;13772;13773;13774;13775;13776;13777;13778;13779;13780;13781;13782;13783;13784;13785;13786;13787;13788;13789;13790;38679;38680;38681;38682;38683;38684;38685;38686;38687;38688;38689;53714;53715;53716;53717;53718;53719;53720;53721;53722;53723;53724;53725;53726;53727…	260;261;262;263;264;265;266;267;268;269;270;271;272;273;274;275;276;277;278;12772;12773;12774;12775;12776;12777;12778;12779;12780;12781;12782;12783;12784;12785;12786;12787;12788;12789;12790;12791;12792;12793;12794;12795;12796;35994;35995;35996;35997;35998;35999;36000;36001;36002;50170;50171;50172;50173;50174;50175;50176;50177;50178;50179;50180;50181;50182;50183;50184;50185;50186;50187;50188;50189…	276;12773;36002;50172;50197;81349;89276;114572;114603;143305;166695;294144;329527;407535;432747;432757;435266;539022;595625;604758;629427;629438;638461;638953;663777;689268;701268;734001;738692	426	260
290	sp|O00232|PSD12_HUMAN	sp|O00232|PSD12_HUMAN	26S proteasome non-ATPase regulatory subunit 12 OS=Homo sapiens OX=9606 GN=PSMD12 PE=1 SV=3	24	24	24	1	24	24	24	56.1	56.1	56.1	52.904	456	456	0	234.62	AIYDTPCIQAESEK;AIYDTPCIQAESEKWQQALK;DPNNLLNDWSQK;EAASILQELQVETYGSMEK;EAASILQELQVETYGSMEKK;ERVEFILEQMR;EWDLLNENIMLLSK;FFQEENTEK;FFQEENTEKLK;GSLESPATDVFGSTEEGEKR;IYVEIER;LAGIINFQR;LAGIINFQRPK;LFTTMELMR;LNSLMSLVNK;LQEVIETLLSLEK;MAQLLDLSVDESEAFLSNLVVNK;MEVDYSATVDQR;MVQQCCTYVEEITDLPIK;SVVLYVILAPFDNEQSDLVHR;TASDMVSTSR;VEFILEQMR;WSTLVEDYGMELR;WSTLVEDYGMELRK		2394;2395;8231;9156;9157;12146;12986;13727;13728;18984;25785;27900;27901;29526;32472;33116;35584;35856;36919;48007;48435;52840;57704;57705	True;True;True;True;True;True;True;True;True;True;True;True;True;True;True;True;True;True;True;True;True;True;True;True	2597;2598;8984;9975;9976;9977;13239;14164;14165;14965;14966;20741;28176;30476;30477;32236;32237;35475;35476;36163;38864;38865;39291;39292;40960;40961;53104;53589;53590;58443;58444;63802;63803;63804	30802;30803;30804;30805;30806;30807;30808;30809;30810;30811;30812;30813;30814;30815;30816;30817;30818;30819;107023;107024;107025;107026;107027;107028;107029;107030;107031;107032;107033;107034;107035;107036;107037;107038;107039;107040;107041;107042;118257;118258;118259;118260;118261;118262;118263;118264;118265;118266;118267;154535;154536;154537;154538;154539;154540;154541;154542;154543;165000;1650…	28774;28775;28776;28777;28778;28779;28780;28781;28782;28783;28784;28785;28786;28787;28788;100252;100253;100254;100255;100256;100257;100258;100259;100260;100261;100262;100263;100264;100265;100266;100267;100268;100269;100270;110759;110760;110761;110762;110763;110764;110765;110766;144350;144351;144352;144353;144354;144355;144356;144357;154041;154042;154043;154044;154045;154046;154047;154048;154049;1…	28777;28783;100266;110759;110765;144352;154054;163140;163146;226450;315743;344072;344078;363515;401925;409057;438965;442744;458299;589055;594497;651063;714469;714471	427;428;429;430;431;432;433;434;435;436	16;60;88;104;177;190;312;315;326;378
291	sp|O00233|PSMD9_HUMAN	sp|O00233|PSMD9_HUMAN	26S proteasome non-ATPase regulatory subunit 9 OS=Homo sapiens OX=9606 GN=PSMD9 PE=1 SV=3	9	9	9	1	9	9	9	40.4	40.4	40.4	24.682	223	223	0	31.743	ANYDVLESQK;GIGMNEPLVDCEGYPR;GLLGCNIIPLQR;HNIICLQNDHK;KLGQSESQGPPR;LGQSESQGPPR;PLNVTVIR;QVEEALHQLHAR;SDVDLYQVR		3603;17374;17920;20851;26745;29970;39911;42436;44380	True;True;True;True;True;True;True;True;True	3939;18978;18979;19552;22774;29216;32725;44299;47040;49120	46336;46337;46338;46339;46340;46341;46342;46343;46344;46345;46346;46347;222178;222179;222180;222181;222182;222183;222184;222185;222186;222187;222188;222189;229227;229228;229229;229230;229231;229232;229233;229234;229235;229236;229237;229238;229239;229240;229241;229242;229243;229244;229245;269238;269239;269240;269241;269242;269243;269244;269245;269246;269247;269248;269249;269250;269251;269252;26925…	43060;43061;43062;43063;43064;43065;43066;43067;43068;206974;206975;206976;206977;206978;206979;206980;206981;213539;213540;213541;213542;213543;213544;213545;213546;213547;213548;213549;213550;213551;213552;213553;213554;213555;213556;213557;213558;213559;251010;251011;251012;251013;251014;251015;251016;251017;251018;251019;251020;251021;251022;251023;328334;328335;328336;328337;328338;328339;32…	43064;206975;213549;251016;328339;370254;494063;521862;544961	437	52
292	sp|O00244|ATOX1_HUMAN	sp|O00244|ATOX1_HUMAN	Copper transport protein ATOX1 OS=Homo sapiens OX=9606 GN=ATOX1 PE=1 SV=1	2	2	2	1	2	2	2	20.6	20.6	20.6	7.4016	68	68	0.003946	2.7507	LGGVKYDIDLPNK;YDIDLPNKK		29771;58046	True;True	32502;64182	393963;770738;770739;770740;770741;770742;770743;770744	367751;718477;718478	367751;718477
293	sp|O00264|PGRC1_HUMAN	sp|O00264|PGRC1_HUMAN	Membrane-associated progesterone receptor component 1 OS=Homo sapiens OX=9606 GN=PGRMC1 PE=1 SV=3	12	12	11	1	12	12	11	47.7	47.7	43.1	21.671	195	195	0	80.679	DFTPAELR;DFTPAELRR;EGEEPTVYSDEEEPKDESAR;FDGVQDPR;FYGPEGPYGVFAGR;GDQPAASGDSDDDEPPPLPR;GLATFCLDK;ILMAINGK;IVRGDQPAASGDSDDDEPPPLPR;KFYGPEGPYGVFAGR;RDFTPAELR;RFDGVQDPR		6907;6908;10175;13435;15823;16406;17692;23732;25539;26261;42823;42903	True;True;True;True;True;True;True;True;True;True;True;True	7520;7521;11080;14649;17294;17936;19317;25887;25888;27918;28687;47455;47544	89271;89272;89273;89274;89275;89276;89277;89278;89279;89280;89281;89282;89283;89284;89285;89286;89287;89288;89289;89290;89291;89292;89293;89294;89295;89296;89297;89298;89299;89300;89301;89302;89303;130784;130785;130786;130787;130788;130789;130790;130791;130792;171406;171407;171408;201886;201887;201888;201889;201890;201891;201892;201893;201894;201895;201896;201897;201898;201899;201900;201901;20190…	83552;83553;83554;83555;83556;83557;83558;83559;83560;83561;83562;83563;83564;83565;83566;83567;83568;83569;83570;83571;83572;83573;83574;83575;83576;83577;83578;83579;83580;83581;83582;83583;83584;122519;122520;122521;122522;122523;122524;160027;160028;160029;188164;188165;188166;188167;188168;188169;188170;188171;188172;188173;188174;188175;188176;188177;188178;188179;188180;188181;188182;18818…	83552;83575;122519;160029;188178;195293;210950;290556;312509;321742;526337;527191	438	91
294	sp|O00267|SPT5H_HUMAN	sp|O00267|SPT5H_HUMAN	Transcription elongation factor SPT5 OS=Homo sapiens OX=9606 GN=SUPT5H PE=1 SV=1	24	24	24	1	24	24	24	28.3	28.3	28.3	121	1087	1087	0	69.869	ATAISLMR;DVTNFTVGGFAPMSPR;FAVALDSEQNNIHVK;FEGDTGLIVR;FIAYQFTDTPLQIK;GIYKDDIAQVDYVEPSQNTISLK;GYIYVEAYK;HEDLKDMLEFPAQELR;HLVLAGGSKPR;KFIAYQFTDTPLQIK;LGYWNQQMVPIK;MDLDEQLK;RDNELIGQTVR;RPGGMTSTYGR;SFAFLHCK;SVTGGMCSVYLK;SVVAPEHVK;TPAQSGAWDPNNPNTPSR;TPHYGSQTPLHDGSR;TPMYGSQTPLQDGSR;VEENFVILFSDLTMHELK;VELHSTCQTISVDR;VRDTYLDTQVVGQTGVIR;VVSISSEHLEPITPTK		4564;8949;13319;13566;14070;17565;19761;20023;20775;26211;30100;35686;42829;43473;44677;47982;47995;50523;50615;50684;52819;52897;55820;56896	True;True;True;True;True;True;True;True;True;True;True;True;True;True;True;True;True;True;True;True;True;True;True;True	4977;4978;9751;9752;14523;14789;15345;19185;21588;21867;22679;28631;32869;39033;47463;48142;48143;49446;53076;53089;55899;55998;56080;58422;58504;61767;62939	59595;59596;59597;59598;59599;59600;59601;59602;59603;59604;59605;59606;115656;115657;115658;169750;169751;169752;169753;169754;169755;169756;169757;172759;172760;172761;172762;172763;172764;172765;172766;172767;172768;179499;179500;179501;179502;179503;224992;224993;224994;224995;224996;253580;256569;256570;256571;256572;256573;268164;268165;268166;268167;268168;268169;268170;268171;268172;26817…	55531;55532;55533;55534;55535;55536;55537;55538;108316;108317;158476;158477;158478;158479;158480;158481;158482;158483;161243;161244;161245;161246;161247;161248;161249;167475;167476;167477;167478;167479;209639;209640;209641;209642;209643;236220;239026;239027;239028;239029;250027;250028;250029;250030;250031;250032;250033;250034;250035;250036;250037;250038;250039;250040;250041;250042;250043;321179;3…	55538;108316;158483;161247;167475;209640;236220;239029;250034;321179;371648;440576;526475;534840;548386;588814;588935;621310;622343;623283;650874;651712;690915;705026	439;440;441;442;443;444	197;508;665;761;786;1011
295	sp|O00273|DFFA_HUMAN	sp|O00273|DFFA_HUMAN	DNA fragmentation factor subunit alpha OS=Homo sapiens OX=9606 GN=DFFA PE=1 SV=1	9	9	9	1	9	9	9	29.9	29.9	29.9	36.521	331	331	0	24.769	ACDILAIDK;EQHGVAASCLEDLR;ETSSDVALASHILTALR;FVALASNEK;KTETVQEACER;LQHTLQQVLDQR;LQHTLQQVLDQREEVR;LQQTQSLHSLR;QLLQLYLQALEK		668;11961;12545;15553;27355;33177;33178;33374;41507	True;True;True;True;True;True;True;True;True	713;13034;13676;16998;29889;36228;36229;36445;46027	7769;152341;152342;152343;152344;152345;152346;159385;159386;159387;159388;159389;159390;159391;198269;198270;198271;198272;198273;198274;198275;198276;198277;198278;198279;360463;360464;360465;360466;360467;360468;360469;360470;360471;438848;438849;438850;438851;438852;438853;438854;438855;438856;438857;438858;438859;438860;438861;438862;438863;438864;441473;441474;441475;441476;441477;441478;44…	7248;142302;142303;142304;142305;142306;148842;148843;148844;148845;148846;148847;184775;184776;184777;184778;184779;184780;184781;184782;184783;184784;184785;336192;336193;336194;336195;336196;336197;336198;336199;336200;409818;409819;409820;409821;409822;409823;409824;409825;409826;409827;409828;409829;409830;409831;412258;412259;412260;412261;412262;412263;412264;412265;412266;412267;412268;51…	7248;142304;148842;184778;336198;409821;409826;412266;511724
296	sp|O00291|HIP1_HUMAN	sp|O00291|HIP1_HUMAN	Huntingtin-interacting protein 1 OS=Homo sapiens OX=9606 GN=HIP1 PE=1 SV=5	24	24	22	1	24	24	22	26.5	26.5	24.2	116.22	1037	1037	0	105.1	AELDELRR;AIGEELLPR;AINTQEVAVK;AQLENMKTESQR;ELEDSLER;ELQDTQLK;FCHVFHK;GHVSELEADLAEQQHLR;GVNQATAGVVASTISGK;LAPLIQVILDCSHLYDYTVK;LHSCLPADTLQGHR;LIQIPQLPENPPNFLR;LKDLFYR;LPLSSNAVLCWK;MWGHLSEGYGQLCSIYLK;QAQVDLER;SSNLQYFK;SVSVTAAGQCR;TCILGTHHEK;TQEQLEVLESLKQELATSQR;VLELENELQK;VLELENELQKER;WTEGLISASK;YSELVQNHADLLR		1144;2173;2282;3996;11040;11387;13359;17282;19508;28087;30246;30582;30732;32731;36964;40313;47287;47974;48540;50824;54369;54370;57716;59403	True;True;True;True;True;True;True;True;True;True;True;True;True;True;True;True;True;True;True;True;True;True;True;True	1232;2350;2473;4363;12014;12386;14564;18875;21318;30685;33031;33393;33558;35755;41035;44735;52321;53068;53702;56233;60125;60126;63816;65665	13458;13459;13460;13461;13462;13463;13464;13465;13466;13467;13468;13469;13470;13471;13472;13473;13474;13475;27399;27400;27401;27402;27403;27404;27405;27406;27407;27408;27409;27410;27411;27412;27413;29263;29264;29265;29266;29267;29268;29269;29270;29271;29272;29273;29274;29275;29276;29277;29278;29279;29280;29281;52445;52446;141746;141747;141748;141749;141750;141751;141752;145677;145678;145679;14568…	12504;12505;12506;12507;12508;12509;12510;12511;12512;12513;12514;12515;12516;12517;12518;12519;25543;25544;25545;25546;25547;25548;25549;25550;25551;25552;25553;25554;27336;27337;27338;27339;27340;27341;27342;27343;27344;27345;27346;27347;27348;27349;27350;27351;27352;27353;27354;48997;132633;132634;132635;132636;132637;132638;136172;136173;136174;136175;158957;158958;158959;205647;205648;205649…	12514;25544;27348;48997;132636;136174;158957;205654;233026;346564;373880;377992;380086;404828;459415;498327;580396;588601;595979;624562;672457;672458;714616;735522	445	394
297	sp|O00299|CLIC1_HUMAN	sp|O00299|CLIC1_HUMAN	Chloride intracellular channel protein 1 OS=Homo sapiens OX=9606 GN=CLIC1 PE=1 SV=4	20	20	20	1	20	20	20	84.2	84.2	84.2	26.922	241	241	0	323.31	AEEQPQVELFVK;EEFASTCPDDEEIELAYEQVAK;FLDGNELTLADCNLLPK;GFTIPEAFR;GVTFNVTTVDTK;GVTFNVTTVDTKR;IEEFLEAVLCPPR;IGNCPFSQR;IGNCPFSQRLFMVLWLK;KFLDGNELTLADCNLLPK;LAALNPESNTAGLDIFAK;LCPGGQLPFLLYGTEVHTDTNK;LFMVLWLK;LHIVQVVCK;LHIVQVVCKK;NSNPALNDNLEK;VLDNYLTSPLPEEVDETSAEDEGVSQR;VLDNYLTSPLPEEVDETSAEDEGVSQRK;YLSNAYAR;YRGFTIPEAFR		1054;9809;14373;16903;19568;19569;22142;22716;22717;26216;27715;28397;29401;30180;30181;39012;54297;54298;58976;59348	True;True;True;True;True;True;True;True;True;True;True;True;True;True;True;True;True;True;True;True	1136;10686;15673;18465;21381;21382;24171;24786;24787;28636;30267;31021;32097;32098;32957;32958;43329;60049;60050;65184;65606	12242;12243;12244;12245;12246;12247;12248;12249;12250;12251;12252;12253;12254;12255;12256;12257;12258;12259;12260;12261;12262;12263;12264;126850;126851;126852;126853;126854;126855;126856;126857;126858;126859;126860;126861;126862;126863;126864;126865;126866;126867;126868;126869;126870;126871;126872;126873;126874;183369;183370;183371;183372;183373;183374;183375;183376;183377;183378;183379;183380;18…	11331;11332;11333;11334;11335;11336;11337;11338;11339;11340;11341;11342;11343;11344;11345;11346;11347;11348;11349;11350;11351;11352;11353;11354;11355;11356;11357;11358;118898;118899;118900;118901;118902;118903;118904;118905;118906;118907;118908;118909;118910;118911;118912;118913;118914;118915;118916;118917;118918;118919;118920;118921;118922;118923;118924;171052;171053;171054;171055;171056;171057;…	11344;118906;171071;201380;233645;233671;269637;276469;276476;321246;341770;350327;361758;372987;373013;483842;671341;671353;730243;734940	446	32
298	sp|O00300|TR11B_HUMAN	sp|O00300|TR11B_HUMAN	Tumor necrosis factor receptor superfamily member 11B OS=Homo sapiens OX=9606 GN=TNFRSF11B PE=1 SV=3	5	5	5	1	5	5	5	15.7	15.7	15.7	46.026	401	401	0	12.296	ACKPSDQILK;FTPNWLSVLVDNLPGTK;IIQDIDLCENSVQR;LFLEMIGNQVQSVK;VNAESVER		696;15489;23184;29368;55124	True;True;True;True;True	742;16927;25293;32058;60995	8166;8167;8168;197577;197578;197579;197580;197581;197582;197583;197584;197585;197586;197587;197588;197589;197590;197591;197592;197593;197594;197595;302902;387462;387463;387464;387465;731189	7613;184164;184165;184166;184167;184168;184169;184170;184171;184172;184173;184174;184175;184176;184177;184178;184179;282731;361400;681734	7613;184175;282731;361400;681734
299	sp|O00303|EIF3F_HUMAN	sp|O00303|EIF3F_HUMAN	Eukaryotic translation initiation factor 3 subunit F OS=Homo sapiens OX=9606 GN=EIF3F PE=1 SV=1	16	16	16	1	16	16	16	52.1	52.1	52.1	37.563	357	357	0	198.73	AYVSTLMGVPGR;EAPNPIHLTVDTSLQNGR;FLMSLVNQVPK;IGVDLIMK;IQDALSTVLQYAEDVLSGK;KVSPNELILGWYATGHDITEHSVLIHEYYSR;LHPVILASIVDSYER;LHPVILASIVDSYERR;NMYELHKK;TCFSPNR;TMGVMFTPLTVK;VIGLSSDLQQVGGASAR;VIGTLLGTVDK;VSADNTVGR;VSPNELILGWYATGHDITEHSVLIHEYYSR;YAYYDTER		5563;9427;14546;22792;24438;27541;30233;30234;38504;48532;50348;53834;53845;55881;56083;57969	True;True;True;True;True;True;True;True;True;True;True;True;True;True;True;True	6064;6065;10273;15861;15862;24868;24869;26702;30082;33015;33016;42768;53693;55684;55685;55686;59526;59539;61831;62053;64088	72171;72172;72173;72174;72175;72176;72177;72178;72179;72180;72181;72182;72183;72184;72185;121697;121698;121699;121700;121701;121702;121703;121704;121705;121706;121707;121708;121709;121710;121711;121712;121713;121714;121715;121716;121717;185514;185515;185516;185517;185518;185519;185520;185521;185522;185523;185524;185525;185526;185527;185528;185529;185530;185531;185532;185533;185534;185535;185536;1…	67258;67259;67260;67261;67262;67263;67264;67265;67266;67267;67268;67269;113996;113997;113998;113999;114000;114001;114002;114003;114004;114005;114006;114007;114008;114009;114010;114011;114012;114013;114014;173020;173021;173022;173023;173024;173025;173026;173027;173028;173029;173030;173031;173032;173033;173034;173035;173036;173037;173038;173039;173040;173041;173042;173043;173044;277202;277203;27720…	67258;114005;173027;277211;298868;339503;373612;373615;477979;595845;618968;664210;664428;691542;694268;717546	447;448;449;450;451	221;228;231;253;309
300	sp|O00308|WWP2_HUMAN	sp|O00308|WWP2_HUMAN	NEDD4-like E3 ubiquitin-protein ligase WWP2 OS=Homo sapiens OX=9606 GN=WWP2 PE=1 SV=2	3	2	2	1	3	2	2	3.7	2.5	2.5	98.911	870	870	0.00046125	4.2011	FIDTGFTLPFYK;LLQFVTGTCR;QIQWFWQVVK		14084;31790;41139	True;False;True	15360;34680;45640	179684;179685;179686;179687;179688;179689;421530;421531;421532;421533;421534;421535;421536;421537;421538;421539;421540;421541;421542;421543;421544;421545;421546;544553	167639;167640;167641;167642;393657;393658;393659;393660;393661;393662;393663;393664;393665;393666;393667;393668;393669;393670;393671;393672;393673;507643	167641;393658;507643
301	sp|O00329|PK3CD_HUMAN	sp|O00329|PK3CD_HUMAN	Phosphatidylinositol 4,5-bisphosphate 3-kinase catalytic subunit delta isoform OS=Homo sapiens OX=9606 GN=PIK3CD PE=1 SV=2	2	2	1	1	2	2	1	2.4	2.4	1.6	119.48	1044	1044	0.00023747	4.7499	DALLNWLK;VPFILTYDFVHVIQQGK		6502;55395	True;True	7079;61301	84195;735057;735058;735059;735060;735061	78765;685338;685339	78765;685339
302	sp|O00330|ODPX_HUMAN	sp|O00330|ODPX_HUMAN	Pyruvate dehydrogenase protein X component, mitochondrial OS=Homo sapiens OX=9606 GN=PDHX PE=1 SV=3	7	7	7	1	7	7	7	19.8	19.8	19.8	54.122	501	501	0.00025113	6.101	ANLENPIR;HSLDASQGTATGPR;ILMPSLSPTMEEGNIVK;LGSLIGLIVEEGEDWKHVEIPK;LTEDEEGNAK;STVPHAYATADCDLGAVLK;VSVNDFIIK		3522;21123;23740;29993;34233;47688;56158	True;True;True;True;True;True;True	3855;23068;25901;32752;37366;52755;62133	45462;45463;273356;311444;396951;396952;396953;451894;627990;627991;745684;745685;745686;745687	42258;254899;290739;370480;370481;370482;421889;585143;695193;695194;695195;695196	42258;254899;290739;370480;421889;585143;695195
303	sp|O00391|QSOX1_HUMAN	sp|O00391|QSOX1_HUMAN	Sulfhydryl oxidase 1 OS=Homo sapiens OX=9606 GN=QSOX1 PE=1 SV=3	12	12	12	1	12	12	12	20.2	20.2	20.2	82.577	747	747	0	43.197	AHFSPSNIILDFPAAGSAAR;DFNIPGFPTVR;FGVTDFPSCYLLFR;IYMADLESALHYILR;KFGVTDFPSCYLLFR;LAGAPSEDPQFPK;LEEIDGFFAR;NNEEYLALIFEK;SALYSPSDPLTLLQADTVR;SFYTAYLQR;VGSPNAAVLWLWSSHNR;VLNTEANVVR		1975;6873;13982;25742;26206;27886;28887;38518;44012;44862;53522;54690	True;True;True;True;True;True;True;True;True;True;True;True	2135;7484;15250;28131;28132;28626;30461;31546;42782;48722;49644;59189;60472	24607;24608;24609;24610;24611;24612;24613;24614;24615;24616;88992;88993;88994;88995;88996;88997;88998;88999;89000;178185;178186;178187;178188;178189;178190;178191;178192;178193;178194;178195;178196;178197;178198;178199;178200;178201;178202;337669;337670;337671;337672;337673;337674;337675;337676;337677;337678;337679;337680;337681;337682;337683;337684;337685;337686;337687;337688;337689;337690;33769…	22960;22961;22962;22963;22964;22965;22966;22967;22968;83314;83315;83316;83317;83318;83319;83320;83321;83322;83323;166264;166265;166266;166267;166268;166269;166270;166271;166272;166273;166274;166275;166276;166277;166278;166279;166280;315285;315286;315287;315288;315289;315290;315291;315292;315293;315294;315295;315296;315297;315298;315299;315300;315301;315302;315303;315304;315305;315306;315307;32114…	22966;83319;166270;315288;321141;343902;356320;478163;541077;550222;659971;675777	452	301
304	sp|O00399|DCTN6_HUMAN	sp|O00399|DCTN6_HUMAN	Dynactin subunit 6 OS=Homo sapiens OX=9606 GN=DCTN6 PE=1 SV=1	5	5	5	1	5	5	5	27.4	27.4	27.4	20.747	190	190	0	12.379	IAPGAVVCVESEIR;ILPNYHHLK;ILPNYHHLKK;MGDNNVIESK;VQTERPQPQTLQLDFLMK		21687;23783;23784;35953;55773	True;True;True;True;True	23680;25949;25950;39431;39432;61716;61717	283043;283044;283045;283046;311921;311922;311923;311924;311925;311926;311927;311928;311929;311930;311931;311932;311933;311934;311935;311936;311937;311938;311939;311940;311941;311942;311943;311944;311945;311946;311947;311948;311949;311950;475902;475903;475904;475905;740585;740586;740587;740588;740589;740590;740591;740592;740593;740594;740595;740596;740597;740598	264343;264344;264345;291156;291157;291158;291159;291160;291161;291162;291163;291164;291165;291166;291167;291168;291169;291170;291171;291172;291173;291174;291175;291176;291177;291178;291179;291180;444272;444273;444274;444275;690528;690529;690530;690531;690532;690533;690534;690535;690536;690537;690538;690539;690540;690541;690542	264344;291156;291177;444272;690537	453;454	101;168
305	sp|O00400|ACATN_HUMAN	sp|O00400|ACATN_HUMAN	Acetyl-coenzyme A transporter 1 OS=Homo sapiens OX=9606 GN=SLC33A1 PE=1 SV=1	4	4	4	1	4	4	4	11.1	11.1	11.1	60.908	549	549	0	7.6261	EALLGDTGTGDFLK;ECVGASNQNCR;EHLALLAVPMVPLQIILPLIISK;LLWAPLVDAVYVK		9353;9618;10469;32073	True;True;True;True	10188;10480;11403;11404;34986	120943;120944;120945;120946;120947;124577;124578;124579;124580;134371;134372;424856;424857;424858;424859;424860;424861;424862;424863;424864;424865;424866;424867;424868;424869;424870;424871;424872;424873;424874;424875	113311;116763;116764;125845;125846;396810;396811;396812;396813;396814;396815;396816;396817;396818;396819;396820;396821;396822;396823;396824;396825;396826;396827;396828	113311;116764;125846;396823	455	352
306	sp|O00401|WASL_HUMAN	sp|O00401|WASL_HUMAN	Actin nucleation-promoting factor WASL OS=Homo sapiens OX=9606 GN=WASL PE=1 SV=2	6	6	6	1	6	6	6	12.7	12.7	12.7	54.826	505	505	0	25.274	AALLDQIR;FYGPQVNNISHTK;RQAPPPPPPSR;RVTNVGSLLLTPQENESLFTFLGK;VIYDFIEK;VTNVGSLLLTPQENESLFTFLGK		342;15825;43589;43789;54044;56390	True;True;True;True;True;True	365;17296;48268;48482;59775;62384	3729;3730;3731;201926;575308;575309;577972;577973;577974;577975;577976;577977;577978;716149;748965;748966;748967	3459;3460;188203;536200;538625;538626;538627;667812;698215	3460;188203;536200;538625;667812;698215
307	sp|O00410|IPO5_HUMAN	sp|O00410|IPO5_HUMAN	Importin-5 OS=Homo sapiens OX=9606 GN=IPO5 PE=1 SV=4	61	61	59	1	61	61	59	67	67	66.4	123.63	1097	1097	0	323.31	AAAAAEQQQFYLLLGNLLSPDNVVR;AIGTEPDSDVLSEIMHSFAK;AKLEEHFK;ATAAFILANEHNVALFK;CIEVMGDGCLNNEHFEELGGILK;EAALHIFWNFPGIFGNQQQHYLDVIK;EFQQYLPVVMGPLMK;EGFVEYTEQVVK;EHIMQMLQNPDWK;EKFMQDASDVMQLLLK;ELKEGFVEYTEQVVK;ENVNATENCISAVGK;FLFDSVSSQNVGLR;FMQDASDVMQLLLK;FVPYYDLFMPSLK;FYFHDGVR;GPEYLTQMWHFMCDALIK;HFADLLPGFLQAVNDSCYQNDDSVLK;HIVENAVQK;HLHSIMVLK;IFSIIAEGEMHEAIK;IFSIIAEGEMHEAIKHEDPCAK;ITFLLQAIR;KQAEETYENIPGQS…		7;2188;2457;4547;5870;9146;10066;10201;10464;10850;11214;11773;14427;14761;15690;15810;18418;20109;20494;20637;22499;22500;25128;27172;27432;28365;28883;31922;32241;33090;34846;34862;35503;36402;38209;40149;40189;41266;41712;41713;42619;43292;44543;45998;45999;46261;47423;49513;49761;52003;52452;53717;55597;55848;55920;55921;57828;57829;57875;57876;58962	True;True;True;True;True;True;True;True;True;True;True;True;True;True;True;True;True;True;True;True;True;True;True;True;True;True;True;True;True;True;True;True;True;True;True;True;True;True;True;True;True;True;True;True;True;True;True;True;True;True;True;True;True;True;True;True;True;True;True;True;True	8;2366;2367;2665;4960;6391;9965;10961;10962;10963;11108;11396;11807;12191;12832;15734;16126;16127;16128;17155;17280;20128;21960;22370;22526;22527;24550;24551;24552;27470;29689;29968;30985;30986;31542;34825;35223;35224;36135;38029;38046;38735;40138;40139;40140;42413;44557;44558;44602;45774;46248;46249;47235;47948;49295;49296;50879;50880;51169;52465;52466;54762;55037;57524;57525;58029;59403;59404;6…	109;110;111;27684;27685;27686;27687;27688;27689;27690;27691;27692;27693;27694;27695;27696;27697;27698;27699;27700;27701;27702;27703;27704;27705;27706;27707;27708;27709;27710;27711;27712;27713;27714;27715;27716;27717;27718;27719;27720;27721;27722;27723;27724;27725;27726;27727;31551;31552;31553;31554;31555;31556;31557;31558;31559;31560;31561;31562;31563;31564;31565;31566;31567;31568;31569;31570;315…	111;25810;25811;25812;25813;25814;25815;25816;25817;25818;25819;25820;25821;25822;25823;25824;25825;25826;25827;25828;25829;25830;25831;25832;25833;25834;25835;25836;25837;25838;25839;25840;25841;25842;25843;25844;25845;25846;25847;25848;25849;25850;25851;29431;29432;29433;29434;29435;29436;29437;29438;29439;29440;29441;29442;29443;29444;29445;29446;29447;29448;29449;29450;29451;29452;29453;29454…	111;25839;29453;55270;71189;110647;121313;122710;125801;130334;134342;140437;171745;175636;186613;187995;219963;240480;245974;247752;273594;273597;307528;333515;337203;350041;356273;395025;398975;408859;429618;429835;437599;450770;473895;496576;496967;509271;513662;513664;524059;532315;547082;565421;565425;568282;581833;608943;612327;640045;646863;663136;688331;691184;691965;691978;715616;715617;…	456;457;458;459;460;461;462;463;464;465;466;467;468;469;470;471;472;473;474;475;476	95;99;105;176;181;274;293;426;450;493;574;581;627;631;684;727;770;780;910;932;1047
308	sp|O00411|RPOM_HUMAN	sp|O00411|RPOM_HUMAN	DNA-directed RNA polymerase, mitochondrial OS=Homo sapiens OX=9606 GN=POLRMT PE=1 SV=2	2	2	2	1	2	2	2	1.9	1.9	1.9	138.62	1230	1230	0.0083168	2.1662	LVPVLYHVYSFR;VAQVLEGFITR		34970;52328	True;True	38164;57893	462331;462332;691781	431668;644887	431668;644887
309	sp|O00422|SAP18_HUMAN	sp|O00422|SAP18_HUMAN	Histone deacetylase complex subunit SAP18 OS=Homo sapiens OX=9606 GN=SAP18 PE=1 SV=1	6	6	6	1	6	6	6	32	32	32	17.561	153	153	0	9.9235	GTDDSMTLQSQK;GTHFNFAIVFTDVK;KGTDDSMTLQSQK;TCPLLLR;VFTTNNGR;VTQEEIK		19162;19223;26398;48559;53250;56415	True;True;True;True;True;True	20932;20995;28835;28836;53723;58890;62410	245204;245205;245206;245207;245208;245209;245210;245211;245212;245895;346341;346342;346343;346344;346345;346346;346347;346348;639752;639753;639754;639755;704017;704018;704019;704020;704021;704022;749190;749191;749192;749193;749194;749195;749196;749197;749198	228408;228409;228410;228411;228412;229013;323293;323294;323295;323296;323297;323298;323299;323300;596131;656359;656360;698416;698417;698418;698419;698420;698421	228408;229013;323299;596131;656360;698416	477	120
310	sp|O00425|IF2B3_HUMAN	sp|O00425|IF2B3_HUMAN	Insulin-like growth factor 2 mRNA-binding protein 3 OS=Homo sapiens OX=9606 GN=IGF2BP3 PE=1 SV=2	17	16	15	1	17	16	15	36.8	34.5	32.8	63.704	579	579	0	55.483	AIEALSGK;ALQSGPPQSR;DQTPDENDQVVVK;IAPAEAPDAK;IELHGKPIEVEHSVPK;ILAHNNFVGR;IPVSGPFLVK;ITISPLQELTLYNPER;KIQEILTQVK;LLVPTQFVGAIIGK;LYIGNLSENAAPSDLESIFK;LYIGNLSENAAPSDLESIFKDAK;MVIITGPPEAQFK;SILEIMHK;SITILSTPEGTSAACK;TVNELQNLSSAEVVVPR;VAYIPDEMAAQQNPLQQPR		2108;3130;8367;21678;22231;23424;24395;25168;26573;32046;35330;35331;36877;45386;45497;51689;52434	True;True;True;True;True;True;True;True;True;True;True;True;False;True;True;True;True	2281;3388;9129;23670;24262;25549;26655;27516;29029;34957;38552;38553;40886;40887;50221;50348;57186;58011	26659;40291;40292;40293;40294;40295;40296;40297;40298;40299;40300;40301;40302;40303;108469;108470;282922;282923;282924;282925;289881;306672;306673;306674;306675;306676;306677;306678;306679;306680;306681;306682;306683;306684;306685;306686;306687;306688;306689;306690;319759;319760;319761;319762;319763;319764;319765;319766;319767;319768;319769;319770;319771;319772;319773;319774;319775;329961;329962;…	24865;37477;37478;37479;37480;37481;37482;37483;37484;37485;37486;37487;37488;101616;101617;264225;264226;264227;270655;286260;286261;286262;286263;286264;286265;286266;286267;286268;286269;286270;286271;286272;286273;286274;286275;286276;286277;298403;298404;298405;298406;298407;298408;298409;298410;298411;298412;298413;298414;298415;298416;298417;298418;308018;308019;308020;308021;308022;308023…	24865;37479;101617;264227;270655;286274;298409;308027;325820;396434;435836;435838;457622;556881;558316;635800;646631	478	453
311	sp|O00429|DNM1L_HUMAN	sp|O00429|DNM1L_HUMAN	Dynamin-1-like protein OS=Homo sapiens OX=9606 GN=DNM1L PE=1 SV=2	34	34	34	1	34	34	34	63	63	63	81.876	736	736	0	323.31	AEELLAEEK;ALQGASQIIAEIR;AVMHFLVNHVK;CVELVHEEMQR;DTLQSELVGQLYK;FATEYCNTIEGTAK;FISNPNSIILAVTAANTDMATSEALK;GHAVNLLDVPVPVAR;GVSPEPIHLK;ICYIFHETFGR;IFSPNVVNLTLVDLPGMTK;IIQHCSNYSTQELLR;INVLAAQYQSLLNSYGEPVDDKSATLLQLITK;LDLMDAGTDAMDVLMGR;LGIIGVVNR;LHDAIVEVVTCLLR;LLMHHIR;LPVTNEMVHNLVAIELAYINTK;LQDVFNTVGADIIQLPQIVVVGTQSSGK;LYTDFDEIRQEIENETER;MEALIPVINK;NATGPRPALFVPEVSFELLVK;PALFVPEVSFELLVKR;RLPVTNEMVHNLVAI…		1052;3100;5167;6301;8683;13311;14225;17182;19557;21890;22505;23193;24196;28620;29800;30111;31637;32924;33039;35459;35732;37174;39631;43323;43512;44081;45619;47252;47397;47978;48121;49859;49929;58615	True;True;True;True;True;True;True;True;True;True;True;True;True;True;True;True;True;True;True;True;True;True;True;True;True;True;True;True;True;True;True;True;True;True	1134;3355;5629;6864;9461;14515;15508;15509;18764;21370;23903;24557;24558;25302;26436;31259;32537;32880;34518;35959;36081;38692;39098;41286;44007;47980;48187;48797;50477;52280;52281;52434;53072;53230;55144;55216;64796	12199;12200;12201;39934;39935;39936;39937;39938;39939;39940;39941;39942;39943;39944;67539;67540;67541;67542;67543;67544;67545;67546;67547;67548;67549;67550;67551;81339;81340;81341;81342;81343;112669;112670;112671;112672;112673;112674;169630;169631;169632;169633;181457;181458;181459;181460;181461;181462;181463;181464;181465;181466;181467;181468;181469;219471;219472;219473;219474;219475;219476;2194…	11290;37144;37145;37146;37147;37148;37149;37150;37151;37152;37153;37154;37155;62970;62971;62972;62973;62974;62975;62976;62977;62978;62979;75879;105552;105553;105554;105555;105556;105557;158364;169290;169291;169292;169293;169294;169295;169296;169297;204472;204473;204474;204475;204476;204477;204478;204479;204480;204481;204482;204483;204484;204485;204486;204487;204488;204489;204490;204491;233531;233…	11290;37149;62973;75879;105556;158364;169294;204482;233536;266829;273682;282792;296154;353593;368157;371727;391387;406843;408421;437249;441171;462117;491365;532597;535376;541679;560241;580025;581511;588714;590401;613458;614274;725843	479;480;481	150;191;706
312	sp|O00442|RTCA_HUMAN	sp|O00442|RTCA_HUMAN	RNA 3-terminal phosphate cyclase OS=Homo sapiens OX=9606 GN=RTCA PE=1 SV=1	12	12	12	1	12	12	12	44.3	44.3	44.3	39.336	366	366	0	184.52	AFVAGVLPFK;DLYVNIQPVQEPK;FGFIFNCDIK;GGGEVIVR;GGTNAEMAPQIDYTVMVFKPIVEK;GVNADKVGIEAAEMLLANLR;QLNPINLTER;STPGLRPQHLSGLEMIR;TGPVTLHTQTAIHFAEQIAK;VEVDGSIMEGGGQILR;VGIEAAEMLLANLR;VSTALSCLLGLPLR		1541;8008;13837;16990;17134;19496;41535;47605;49279;53000;53389;56129	True;True;True;True;True;True;True;True;True;True;True;True	1662;8713;15090;18560;18715;21303;21304;46057;52665;54506;58612;59041;59042;62102	18178;18179;18180;18181;18182;18183;18184;18185;18186;18187;18188;18189;18190;18191;18192;18193;18194;18195;18196;18197;18198;103991;103992;103993;103994;103995;103996;103997;103998;103999;104000;104001;104002;104003;176112;176113;176114;176115;176116;176117;216970;216971;216972;216973;218812;218813;218814;218815;218816;218817;249873;249874;249875;249876;249877;249878;249879;249880;249881;249882;…	16871;16872;16873;16874;16875;16876;16877;16878;16879;16880;16881;16882;16883;16884;16885;16886;16887;16888;16889;16890;16891;97369;97370;97371;97372;97373;97374;97375;97376;97377;97378;97379;164350;164351;164352;164353;164354;202170;202171;202172;202173;203871;203872;203873;203874;203875;232758;232759;232760;232761;232762;232763;232764;232765;232766;232767;232768;232769;232770;232771;511935;5119…	16874;97373;164350;202171;203871;232766;511936;584142;604735;653126;658363;694838	482	280
313	sp|O00443|P3C2A_HUMAN	sp|O00443|P3C2A_HUMAN	Phosphatidylinositol 4-phosphate 3-kinase C2 domain-containing subunit alpha OS=Homo sapiens OX=9606 GN=PIK3C2A PE=1 SV=2	17	17	17	1	17	17	17	10.9	10.9	10.9	190.68	1686	1686	0	26.737	EGQIEPSFVFR;ENFFLGGVTLPLK;ENFFLGGVTLPLKDFNLSK;FSGLPSNDEPILSFSPK;IASTSEFLK;LIESSLGSIATK;LPLKPSLVAK;LREELLK;LSIIFPLWK;LTQAELEK;LVQLLGGVAEK;SCSFFSSNAVPLK;SLSVATVTR;TADVTSLFGGEDTSR;TNPGYLLSPVTAQR;VSLPLFDFKR;VSNLQVSPK		10355;11671;11672;15248;21743;30401;32712;33527;33867;34467;34990;44195;46212;48268;50472;56048;56074	True;True;True;True;True;True;True;True;True;True;True;True;True;True;True;True;True	11276;12723;12724;16658;23742;33193;35733;36607;36971;37628;38186;48921;51116;53395;55846;62011;62044	132871;132872;132873;132874;149227;149228;194249;194250;194251;194252;194253;194254;194255;194256;194257;283800;283801;402827;402828;433199;443343;447384;447385;447386;447387;447388;447389;447390;455077;462788;462789;462790;462791;462792;462793;462794;462795;462796;462797;462798;462799;582637;582638;582639;582640;609322;635691;665939;744381;744382;744383;744384;744385;744386;744387;744610;744611	124446;124447;124448;139488;139489;181079;181080;181081;181082;181083;181084;181085;181086;265049;375995;375996;404563;413969;417699;417700;417701;417702;417703;417704;424778;432099;432100;432101;432102;432103;432104;432105;432106;432107;432108;432109;432110;542922;567794;592378;620670;694006;694007;694008;694009;694010;694011;694203;694204	124447;139488;139489;181082;265049;375996;404563;413969;417699;424778;432100;542922;567794;592378;620670;694008;694204
314	sp|O00459|P85B_HUMAN;sp|Q92569|P55G_HUMAN	sp|O00459|P85B_HUMAN	Phosphatidylinositol 3-kinase regulatory subunit beta OS=Homo sapiens OX=9606 GN=PIK3R2 PE=1 SV=2	6;1	6;1	5;0	2	6	6	5	13.5	13.5	12	81.544	728	728;461	0	9.2288	ALGATFGPLLLR;DGAPEPGLTLPDLPEQFSPPDVAPPLLVK;ERPEDLELLPGDVLVVSR;IAEIHESR;SFLLALPAPLVTPEASAEAR;TAIEAFNETIK		2784;6948;12127;21582;44778;48340	True;True;True;True;True;True	3018;7568;13219;23568;49553;53476	35905;35906;35907;35908;35909;35910;35911;35912;35913;35914;89813;89814;89815;154322;154323;281439;281440;589510;589511;589512;589513;636509;636510;636511;636512;636513;636514;636515	33415;33416;33417;33418;33419;33420;33421;33422;84054;144145;262848;262849;549290;593119;593120;593121;593122;593123	33420;84054;144145;262848;549290;593119
315	sp|O00461|GOLI4_HUMAN	sp|O00461|GOLI4_HUMAN	Golgi integral membrane protein 4 OS=Homo sapiens OX=9606 GN=GOLIM4 PE=1 SV=1	19	19	19	1	19	19	19	31.9	31.9	31.9	81.879	696	696	0	169.83	AHQDIHTQLQDVK;DNQHQDEAEGDPGNRHEPR;EAANLLEGHAR;EADPESEADR;EPEEHQVEEEHRK;FQSPYEEQLEQQR;KAHQDIHTQLQDVK;LAVQQVEEAQQLR;LEAQETLNK;LKETVYNLR;LQGHLLR;NLLSEHEQLVVTLEDHK;QAELEEGRPQHQEQLR;QQEQQQQQVAR;REPEEHQVEEEHR;SALAAAQTQVAEYK;YLQLQQEKEQELSK;YQQHQESLSAQLQVVYEHR;YSALNVQHQMLK		2014;8143;9153;9190;11812;15099;25870;28293;28812;30793;33155;38269;40196;41974;42881;43968;58955;59317;59375	True;True;True;True;True;True;True;True;True;True;True;True;True;True;True;True;True;True;True	2177;8886;9972;10014;12877;16498;28271;30910;31467;33623;36203;42478;44609;46550;47519;48675;65163;65572;65634;65635	25267;25268;25269;25270;25271;25272;25273;25274;105889;105890;105891;105892;105893;105894;105895;105896;105897;105898;105899;105900;118250;118251;118252;118632;118633;118634;118635;118636;118637;118638;150714;192443;192444;192445;192446;192447;192448;339265;339266;339267;339268;339269;339270;374504;374505;374506;374507;374508;374509;374510;374511;374512;374513;374514;374515;374516;374517;374518;3…	23563;23564;23565;99165;99166;99167;99168;99169;99170;99171;99172;99173;99174;99175;110754;110755;110756;111096;111097;111098;111099;111100;111101;140844;179448;179449;179450;316734;316735;349293;349294;349295;349296;349297;349298;349299;349300;349301;349302;349303;349304;349305;349306;349307;349308;349309;349310;349311;349312;349313;349314;349315;349316;349317;349318;349319;355584;355585;355586;…	23564;99172;110756;111100;140844;179450;316735;349306;355589;380748;409571;474491;497062;516309;526852;540660;730009;734551;735345	483	120
316	sp|O00469|PLOD2_HUMAN	sp|O00469|PLOD2_HUMAN	Procollagen-lysine,2-oxoglutarate 5-dioxygenase 2 OS=Homo sapiens OX=9606 GN=PLOD2 PE=1 SV=2	27	27	27	1	27	27	27	44.4	44.4	44.4	84.685	737	737	0	98.484	ACDELVEEMEHYGK;DKLDPDMALCR;EFIAPVTLK;FLDILLTLDYPK;GFALLNFVVK;GGDGINSIGGGQK;IFQTLNGAVDEVVLK;IFTENIVEQPCPDVFWFPIFSEK;IIAPLVTR;ILIEQNRK;ISGGYENVPTDDIHMK;IVGPEENLSQAEAR;IVQQWNLQDNDDDQLFYTK;KGWSFMHPGR;KIIAPLVTR;LADKYPVVHIGK;LLVITVATK;LTHLHEGLPVK;LWSNFWGALSPDGYYAR;QVDLENVWLHFIR;SEDYVDIVQGNR;VFAGYYTK;VGVWNVPYMANVYLIK;VLGQGEEWR;VVFAADGILWPDKR;VYIDPLKR;YLNSGGFIGYAPYVNR		667;7477;10009;14375;16685;16962;22480;22516;22964;23658;24819;25428;25536;26425;26528;27777;32030;34327;35219;42424;44438;53028;53571;54475;56648;57123;58928	True;True;True;True;True;True;True;True;True;True;True;True;True;True;True;True;True;True;True;True;True;True;True;True;True;True;True	712;8138;10903;15676;18230;18529;24530;24569;25053;25801;27116;27117;27800;27914;28866;28981;30337;34941;37468;38438;47028;49183;58642;59242;59243;60239;62670;63182;65134	7763;7764;7765;7766;7767;7768;96764;96765;96766;96767;96768;96769;96770;96771;128887;128888;128889;128890;128891;128892;128893;128894;128895;128896;128897;183443;183444;213029;213030;213031;213032;213033;213034;213035;213036;213037;213038;213039;213040;213041;213042;213043;213044;216692;216693;216694;216695;216696;216697;216698;216699;216700;216701;216702;292781;292782;292783;292784;292785;292786…	7244;7245;7246;7247;90478;90479;90480;90481;90482;90483;90484;120769;120770;120771;120772;120773;120774;120775;120776;120777;171128;198455;198456;198457;198458;198459;198460;198461;198462;198463;198464;198465;198466;198467;198468;198469;201909;201910;201911;201912;201913;201914;201915;201916;201917;201918;273305;273306;273307;273308;273309;273310;273311;273312;273313;273784;273785;279530;279531;2…	7246;90481;120771;171128;198463;201912;273308;273784;279531;289257;303578;311264;312468;323794;325381;342678;396229;423078;434892;521604;545651;653461;660580;673450;701594;707613;729747	484;485	461;613
317	sp|O00471|EXOC5_HUMAN	sp|O00471|EXOC5_HUMAN	Exocyst complex component 5 OS=Homo sapiens OX=9606 GN=EXOC5 PE=1 SV=1	14	14	14	1	14	14	14	31.9	31.9	31.9	81.852	708	708	0	46.203	IKEAADIIQK;IPMVLHLFDTLHALCNLLVVAPDNLK;LHLIAQELPFDR;LIQNVFEIK;LLEEFVNHIQELQIMDER;NANLYFLDVVQQANTIFHLFDK;NDIFEDAGILCQR;NILHSFVQLR;NVDTVLMELGVR;SNQVAFQHFQELDEHISYVATK;TLNCMIGQMK;TNLPLGPSIDTHGETFLSQEVVVNLLQETK;VCHLGDQLEGVNTPR;YHDLECQLIQEFTSAQR		23303;24329;30197;30590;31186;37142;37286;37882;39250;46514;50106;50460;52473;58518	True;True;True;True;True;True;True;True;True;True;True;True;True;True	25419;26583;32975;33403;34039;41249;41410;42054;43595;51480;55416;55832;58050;64694	304924;318849;399803;399804;399805;399806;399807;405137;405138;405139;405140;405141;413535;413536;413537;494748;496801;496802;503997;503998;503999;504000;504001;504002;504003;521871;521872;521873;521874;521875;612972;612973;661200;665807;665808;665809;665810;665811;665812;665813;665814;665815;665816;694072;694073;776921;776922;776923;776924	284702;297567;373202;373203;373204;378127;378128;378129;378130;385955;385956;461708;463595;470252;470253;470254;470255;470256;470257;486841;486842;486843;486844;571185;571186;616236;620557;620558;620559;620560;620561;620562;647117;647118;724225;724226;724227;724228	284702;297567;373202;378127;385955;461708;463595;470253;486842;571185;616236;620560;647118;724227	486	649
318	sp|O00483|NDUA4_HUMAN	sp|O00483|NDUA4_HUMAN	Cytochrome c oxidase subunit NDUFA4 OS=Homo sapiens OX=9606 GN=NDUFA4 PE=1 SV=1	3	3	3	1	3	3	3	37	37	37	9.3697	81	81	0.00024697	5.6614	FYSVNVDYSK;LALFNPDVCWDR;LGPNDQYK		15876;27984;29940	True;True;True	17351;30567;32687	202642;202643;202644;202645;202646;202647;202648;202649;202650;202651;202652;202653;202654;202655;202656;202657;202658;370044;370045;370046;370047;370048;370049;370050;370051;370052;370053;370054;370055;370056;370057;370058;370059;370060;370061;396324	188851;188852;188853;188854;188855;188856;188857;188858;188859;188860;188861;188862;188863;188864;188865;188866;188867;188868;188869;345104;345105;345106;345107;345108;345109;345110;345111;345112;345113;345114;345115;345116;345117;345118;345119;345120;345121;345122;369910	188853;345104;369910
319	sp|O00487|PSDE_HUMAN	sp|O00487|PSDE_HUMAN	26S proteasome non-ATPase regulatory subunit 14 OS=Homo sapiens OX=9606 GN=PSMD14 PE=1 SV=1	14	14	14	1	14	14	14	63.9	63.9	63.9	34.577	310	310	0	189.85	AGVPMEVMGLMLGEFVDDYTVR;AVAVVVDPIQSVK;AVEEEDKMTPEQLAIK;GKVVIDAFR;HYYSITINYR;LGGGMPGLGQGPPTDAPAVDTAEQVYISSLALLK;LINANMMVLGHEPR;MLLNLHK;MLLNLHKK;QTTSNLGHLNKPSIQALIHGLNR;SWMEGLTLQDYSEHCK;SWMEGLTLQDYSEHCKHNESVVK;VIDVFAMPQSGTGVSVEAVDPVFQAK;VVIDAFR		1923;4898;4953;17652;21514;29740;30528;36314;36315;42379;48064;48065;53764;56715	True;True;True;True;True;True;True;True;True;True;True;True;True;True	2081;5334;5399;5400;19277;23495;32467;32468;33333;33334;39999;40000;46981;53165;53166;59454;59455;62741	23919;23920;23921;23922;23923;63520;63521;63522;63523;63524;63525;63526;63527;63528;63529;63530;63531;63532;63533;63534;63535;63536;63537;63538;63539;63540;63541;63542;63543;63544;63545;64413;64414;64415;64416;64417;64418;64419;64420;64421;64422;64423;64424;64425;64426;64427;226041;226042;280703;280704;280705;280706;280707;280708;280709;280710;280711;280712;280713;280714;280715;280716;393428;3934…	22315;22316;22317;59167;59168;59169;59170;59171;59172;59173;59174;59175;59176;59177;59178;59179;59180;59181;59182;59183;59184;59185;59186;59187;59188;59189;59190;59191;59192;60013;60014;60015;60016;60017;60018;60019;60020;60021;60022;60023;60024;60025;60026;60027;210584;210585;262164;262165;262166;262167;262168;262169;262170;262171;262172;262173;262174;262175;262176;262177;367209;367210;367211;36…	22316;59181;60019;210585;262177;367209;377534;449570;449577;520963;589591;589599;663569;702689	487;488;489;490;491;492;493;494	11;51;54;57;75;167;168;265
320	sp|O00499|BIN1_HUMAN	sp|O00499|BIN1_HUMAN	Myc box-dependent-interacting protein 1 OS=Homo sapiens OX=9606 GN=BIN1 PE=1 SV=1	3	3	3	1	3	3	3	9.9	9.9	9.9	64.699	593	593	0	14.679	AGDVVLVIPFQNPEEQDEGWLMGVK;LNQNLNDVLVGLEK;VGFYVNTFQSIAGLEENFHK		1641;32438;53360	True;True;True	1774;35436;59011	19596;19597;19598;429928;429929;429930;429931;705562;705563;705564;705565;705566;705567;705568	18212;401516;657788;657789;657790;657791;657792;657793;657794	18212;401516;657792
321	sp|O00505|IMA4_HUMAN	sp|O00505|IMA4_HUMAN	Importin subunit alpha-4 OS=Homo sapiens OX=9606 GN=KPNA3 PE=1 SV=2	17	12	12	1	17	12	12	50.7	38.8	38.8	57.81	521	521	0	218.71	AENPSLENHR;AQNVTLEAILQNATSDNPVVQLSAVQAAR;AVGNIVTGTDEQTQVVLNCDVLSHFPNLLSHPK;DQVEYLVQQNVIPPFCNLLSVK;DSQVVQVVLDGLK;DYVISLGVVKPLLSFISPSIPITFLR;EAAWAISNLTISGR;HRNEVTVELR;IEVLQQHENEDIYK;KDQVEYLVQQNVIPPFCNLLSVK;LLSSDRNPPIDDLIK;NILIMAGDEASTIAEIIEECGGLEK;NPPIDDLIK;NVTWVIVNLCR;SGILPILVK;SPHQNVCEQAVWALGNIIGDGPQCR;VQTAALR		1209;4044;5040;8377;8592;9105;9165;21068;22318;26020;31923;37886;38711;39442;44996;46644;55768	True;True;True;True;True;False;False;True;True;True;False;True;False;True;True;True;False	1303;4418;5491;9139;9367;9923;9987;23011;24358;28436;34826;42058;42993;43811;49790;51617;61710	14042;14043;14044;14045;14046;14047;14048;14049;14050;14051;14052;52976;52977;52978;52979;52980;52981;52982;65835;65836;65837;65838;65839;65840;65841;65842;65843;65844;65845;65846;108618;108619;108620;111129;111130;111131;117730;117731;117732;117733;117734;117735;118317;118318;118319;118320;118321;118322;118323;118324;118325;118326;118327;118328;118329;118330;118331;118332;118333;118334;118335;11…	13021;13022;13023;13024;13025;13026;13027;13028;13029;13030;49475;49476;49477;49478;49479;61392;61393;61394;61395;61396;61397;61398;61399;61400;61401;61402;61403;61404;101754;101755;101756;104061;104062;104063;110277;110278;110279;110280;110281;110808;110809;110810;110811;110812;110813;110814;110815;110816;110817;110818;110819;110820;110821;110822;110823;110824;110825;110826;110827;254251;254252;…	13026;49476;61393;101755;104062;110277;110825;254253;271510;318899;395046;470301;480421;489239;552197;572944;690493
322	sp|O00541|PESC_HUMAN	sp|O00541|PESC_HUMAN	Pescadillo homolog OS=Homo sapiens OX=9606 GN=PES1 PE=1 SV=1	13	13	13	1	13	13	13	23.5	23.5	23.5	68.002	588	588	0	32.255	CHVQTIQLCR;EALAFIIR;GIYYQAEVLGQPIVWITPYAFSHDHPTDVDYR;GSATNYITR;ITHQIVDRPGQQTSVIGR;LAALEEQR;LAALSASLAR;LAQEEESEAK;LAQEEESEAKR;LEGQAQAEAK;LTVEFMHYIIAAR;RLTVEFMHYIIAAR;SEWNTVER		5853;9323;17571;18875;25154;27713;27719;28114;28115;28955;34555;43357;44662	True;True;True;True;True;True;True;True;True;True;True;True;True	6373;10157;19191;20627;27502;30265;30271;30713;30714;31615;37722;48015;49428	76119;76120;120668;120669;120670;120671;120672;120673;120674;225049;225050;225051;225052;225053;241649;329751;329752;329753;329754;329755;329756;329757;329758;329759;329760;329761;329762;329763;329764;329765;366395;366504;366505;366506;372058;372059;372060;372061;372062;372063;372064;372065;372066;372067;372068;382569;382570;382571;382572;382573;382574;382575;382576;382577;382578;456412;456413;57…	70974;113049;113050;113051;113052;113053;113054;209688;209689;209690;209691;225155;307824;307825;307826;307827;307828;307829;307830;307831;307832;307833;307834;307835;307836;307837;341759;341853;341854;347006;347007;347008;347009;347010;347011;347012;347013;347014;347015;347016;356945;356946;356947;356948;356949;356950;356951;356952;426031;532858;548192;548193;548194	70974;113049;209690;225155;307829;341759;341854;347006;347010;356950;426031;532858;548192
323	sp|O00560|SDCB1_HUMAN	sp|O00560|SDCB1_HUMAN	Syntenin-1 OS=Homo sapiens OX=9606 GN=SDCBP PE=1 SV=1	14	14	14	1	14	14	14	69.5	69.5	69.5	32.444	298	298	0	323.31	ANVAVVSGAPLQGQLVAR;DSTGHVGFIFK;EVILCKDQDGK;FGDQVLQINGENCAGWSSDK;LYPELSQYMGLSLNEEEIR;MAPSIMK;NGLLTEHNICEINGQNVIGLK;PSSINYMVAPVTGNDVGIR;PSSINYMVAPVTGNDVGIRR;SIDNGIFVQLVQANSPASLVGLR;SLMDHTIPEV;SLYPSLEDLK;SLYPSLEDLKVDK;VIQAQTAFSANPANPAILSEASAPIPHDGNLYPR		3589;8610;12762;13811;35397;35573;37647;40036;40037;45313;46055;46309;46310;53954	True;True;True;True;True;True;True;True;True;True;True;True;True;True	3924;9385;13913;15059;38626;38627;38846;41797;44438;44439;44440;44441;50140;50941;50942;51218;51219;59676	46121;46122;46123;46124;46125;46126;46127;46128;46129;46130;46131;46132;46133;46134;46135;46136;46137;46138;46139;46140;46141;46142;46143;46144;46145;46146;46147;46148;46149;46150;46151;46152;46153;46154;46155;46156;46157;46158;46159;111246;111247;111248;111249;111250;111251;111252;111253;111254;111255;111256;111257;111258;111259;111260;111261;111262;111263;111264;111265;111266;111267;111268;1112…	42851;42852;42853;42854;42855;42856;42857;42858;42859;42860;42861;42862;42863;42864;42865;42866;42867;42868;42869;42870;42871;42872;42873;42874;42875;42876;42877;42878;42879;42880;42881;42882;42883;42884;42885;42886;42887;104160;104161;104162;104163;104164;104165;104166;104167;104168;104169;104170;104171;104172;104173;104174;104175;104176;104177;104178;104179;104180;104181;104182;104183;104184;10…	42858;104173;151397;164094;436444;438790;467640;495385;495460;556092;566063;568922;568946;666529	495;496;497	57;92;291
324	sp|O00562|PITM1_HUMAN	sp|O00562|PITM1_HUMAN	Membrane-associated phosphatidylinositol transfer protein 1 OS=Homo sapiens OX=9606 GN=PITPNM1 PE=1 SV=4	2	2	2	1	2	2	2	2.3	2.3	2.3	134.85	1244	1244	0.0049	2.5547	ILDTIDIVR;SQDHIPLAALPLLATSSSR		23500;46833	True;True	25631;51827	307706;307707;617094;617095;617096;617097	287227;287228;575089;575090;575091	287227;575090
325	sp|O00566|MPP10_HUMAN	sp|O00566|MPP10_HUMAN	U3 small nucleolar ribonucleoprotein protein MPP10 OS=Homo sapiens OX=9606 GN=MPHOSPH10 PE=1 SV=2	5	5	5	1	5	5	5	12.8	12.8	12.8	78.863	681	681	0	15.97	ATGRPECFLTIQEGLASK;LDALSNFHFIPKPPVPEIK;PECFLTIQEGLASK;RPENSLLEETLHFDHAVR;VVSNLPAITMEEVAPVSVSDAALLAPEEIKEK		4674;28458;39701;43456;56903	True;True;True;True;True	5103;31085;44081;48124;62946	61036;377040;377041;377042;377043;377044;377045;377046;377047;377048;377049;377050;377051;377052;377053;377054;377055;527704;573625;573626;573627;573628;756327;756328	56897;351911;351912;351913;351914;351915;351916;351917;351918;351919;351920;351921;351922;351923;351924;351925;351926;492266;534645;534646;705051;705052	56897;351918;492266;534646;705051
326	sp|O00567|NOP56_HUMAN	sp|O00567|NOP56_HUMAN	Nucleolar protein 56 OS=Homo sapiens OX=9606 GN=NOP56 PE=1 SV=4	22	22	22	1	22	22	22	46.6	46.6	46.6	66.049	594	594	0	141.37	AQLGLGHSYSR;GLTDLSACK;IDCFSEVPTSVFGEK;IGAAIQEELGYNCQTGGVIAEILR;LAQFIGNRR;LHFHNLVK;LIAHAGSLTNLAK;LLLETHLPSK;LLLETHLPSKK;LREQVEER;LSFYETGEIPR;LSFYETGEIPRK;LVAFCPFASSQVALENANAVSEGVVHEDLR;MSQVAPSLSALIGEAVGAR;QSLHTYLR;VDNMIIQSISLLDQLDKDINTFSMR;VLLGVGDPK;VLLHVLFEHAVGYALLALK;VREWYGYHFPELVK;VVSLSEYR;YGLIFHSTFIGR;YPASTVQILGAEK		4007;18086;21902;22569;28123;30148;30295;31532;31533;33549;33816;33817;34604;36735;42203;52677;54605;54607;55842;56900;58415;59161	True;True;True;True;True;True;True;True;True;True;True;True;True;True;True;True;True;True;True;True;True;True	4374;19734;23916;24626;30723;32923;33081;34406;34407;36631;36917;36918;37773;40664;40665;46792;58268;58269;60377;60379;61789;62943;64577;65404	52551;52552;52553;52554;52555;52556;231012;285893;285894;285895;285896;285897;285898;285899;294018;294019;294020;372142;399117;399118;399119;399120;399121;399122;399123;399124;399125;399126;399127;399128;399129;399130;399131;399132;399133;399134;401368;401369;401370;401371;401372;401373;401374;401375;401376;401377;417671;417672;417673;417674;417675;417676;417677;417678;417679;417680;417681;417682…	49100;49101;49102;49103;49104;49105;215158;266946;266947;266948;266949;266950;266951;266952;266953;266954;274453;274454;347081;372568;372569;372570;372571;372572;372573;372574;372575;372576;372577;372578;372579;372580;372581;372582;372583;374642;374643;374644;374645;374646;374647;374648;374649;374650;374651;389854;389855;389856;389857;389858;389859;389860;389861;414290;414291;417105;417106;417107…	49102;215158;266947;274454;347081;372571;374651;389857;389860;414291;417105;417109;426510;455681;519112;649376;674910;674922;691139;705043;723138;732706	498;499;500	167;187;289
327	sp|O00571|DDX3X_HUMAN;sp|Q9NQI0|DDX4_HUMAN	sp|O00571|DDX3X_HUMAN	ATP-dependent RNA helicase DDX3X OS=Homo sapiens OX=9606 GN=DDX3X PE=1 SV=3	35;2	34;2	9;0	2	35	34	9	56.5	56.5	16	73.243	662	662;724	0	323.31	DFLDEYIFLAVGR;DLLDLLVEAK;DLMACAQTGSGK;DREEALHQFR;DSLTLVFVETK;ELAVQIYEEAR;ELAVQIYEEARK;FSGGFGAR;GADSLEDFLYHEGYACTSIHGDR;GCHLLVATPGR;GLDISNVK;HAIPIIK;HTMMFSATFPK;HVINFDLPSDIEEYVHR;IVEQDTMPPK;KGADSLEDFLYHEGYACTSIHGDR;KQYPISLVLAPTR;LEQELFSGGNTGINFEK;MLDMGFEPQIR;QEVPSWLENMAYEHHYK;QSSGASSSSFSSSR;QYPISLVLAPTR;SFLLDLLNATGK;SGFGKFER;SPILVATAVAAR;SSFFSDR;TAAFLLPILSQIYSDGPGEALR;VGNLGLATSFFNER;VGSTSENITQK;VR…		6842;7790;7842;8399;8560;10992;10993;15244;15955;16243;17727;19884;21251;21342;25390;26268;27266;29091;36250;40660;42243;42701;44780;44939;46652;47148;48234;53466;53526;55857;56985;58661;59005;59006;59591	True;True;True;True;True;True;True;True;True;True;True;True;True;True;True;True;True;True;False;True;True;True;True;True;True;True;True;True;True;True;True;True;True;True;True	7446;8471;8525;8526;9161;9333;11964;11965;16654;17440;17756;19354;21717;23213;23214;23311;27758;28695;29791;31759;39900;39901;39902;45114;45115;46835;47325;49555;49728;51625;52169;53357;59128;59193;61804;63035;64848;65216;65217;65218;65861	88588;100734;100735;100736;100737;100738;100739;100740;100741;100742;100743;100744;100745;100746;100747;100748;100749;100750;100751;100752;100753;100754;100755;100756;101400;101401;101402;101403;101404;101405;101406;101407;101408;101409;101410;101411;101412;101413;101414;101415;101416;108850;108851;108852;108853;108854;108855;108856;108857;108858;108859;108860;108861;108862;108863;108864;108865;1…	82925;94227;94228;94229;94230;94231;94232;94233;94234;94235;94236;94237;94238;94239;94240;94241;94242;94243;94244;94245;94246;94247;94248;94249;94250;94820;94821;94822;94823;94824;94825;94826;94827;94828;94829;94830;94831;94832;94833;101958;101959;101960;101961;101962;101963;101964;101965;101966;101967;101968;101969;101970;101971;101972;101973;101974;101975;101976;101977;101978;101979;101980;1019…	82925;94245;94820;101975;103615;132118;132128;181048;189793;193597;211315;237719;258306;259647;310783;321889;334977;358286;448709;502005;519385;524932;549321;551472;573053;578644;592021;659419;660005;691255;706189;726427;730706;730708;737545	501;502;503;504;505;506;507	221;352;355;370;379;380;574
330	sp|O00622|CCN1_HUMAN	sp|O00622|CCN1_HUMAN	CCN family member 1 OS=Homo sapiens OX=9606 GN=CCN1 PE=1 SV=1	22	22	22	1	22	22	22	63	63	63	42.026	381	381	0	60.358	AQSEGRPCEYNSR;CAPGVGLVR;CCTPQLTR;CEDGETFSK;CIVQTTSWSQCSK;CNYNCPHANEAAFPFYR;ELGFDASEVELTR;FRCEDGETFSK;FTYAGCLSVK;GLECNFGASSTALK;HQCTCIDGAVGCIPLCPQELSLPNLGCPNPR;ICEVRPCGQPVYSSLK;ILYNPLQGQK;IYQNGESFQPNCK;LFNDIHK;LPVFGMEPR;NNELIAVGK;NVMMIQSCK;RLPVFGMEPR;TCGTGISTR;VTNDNPECR;YCGSCVDGR		4094;5607;5647;5705;5896;6080;11125;15125;15537;17754;20996;21833;23966;25763;29407;32903;38519;39372;43320;48537;56378;57987	True;True;True;True;True;True;True;True;True;True;True;True;True;True;True;True;True;True;True;True;True;True	4471;6111;6156;6216;6418;6626;12101;16524;16981;19381;22932;23841;26143;28154;32104;35937;42783;43731;43732;43733;47976;47977;53699;62371;64108	53698;53699;53700;53701;53702;53703;53704;53705;72630;72631;72632;72633;72634;72635;72636;72637;73629;73630;73631;73632;74544;74545;74546;74547;74548;74549;74550;74551;74552;74553;76707;76708;76709;76710;76711;76712;76713;76714;76715;76716;76717;76718;76719;76720;76721;76722;76723;76724;78730;78731;78732;78733;78734;78735;78736;78737;78738;78739;78740;78741;78742;78743;78744;78745;78746;78747;142…	50156;50157;50158;50159;50160;50161;50162;67693;67694;67695;67696;67697;67698;67699;67700;68688;68689;68690;68691;69541;69542;69543;69544;69545;69546;69547;71534;71535;71536;71537;71538;71539;71540;71541;71542;71543;71544;71545;71546;71547;71548;71549;73393;73394;73395;73396;73397;73398;73399;73400;73401;73402;73403;73404;73405;73406;73407;133369;133370;133371;133372;133373;133374;133375;133376;1…	50156;67698;68690;69542;71537;73404;133376;179714;184581;211550;253148;266160;293126;315514;361802;406637;478168;488270;532581;595886;698034;717701	508;509;510	215;348;349
331	sp|O00629|IMA3_HUMAN	sp|O00629|IMA3_HUMAN	Importin subunit alpha-3 OS=Homo sapiens OX=9606 GN=KPNA4 PE=1 SV=1	17	17	12	1	17	17	12	48	48	36.1	57.886	521	521	0	323.31	ADNEKLDNQR;AVGNIVTGTDEQTQVVLNCDALSHFPALLTHPK;DAQVVQVVLDGLSNILK;DQVAYLIQQNVIPPFCNLLTVK;DYVISLGVVKPLLSFISPSIPITFLR;EAAWAISNLTISGR;IEQLQNHENEDIYK;KDQVAYLIQQNVIPPFCNLLTVK;LLHSPHQNVCEQAVWALGNIIGDGPQCR;LLSSDRNPPIDDLIK;NEVVVELR;NPPIDDLIK;NVTWVMVNLCR;QRNEVVVELR;SGILPILVHCLER;VQNTSLEAIVQNASSDNQGIQLSAVQAAR;VQTAALR		912;5039;6547;8375;9105;9165;22274;26019;31424;31923;37456;38711;39443;42136;44995;55721;55768	True;True;True;True;True;True;True;True;True;True;True;True;True;True;True;True;True	986;5490;7128;9137;9923;9987;24309;28435;34290;34826;41596;42993;43812;46722;49789;61660;61710	10790;10791;10792;10793;10794;10795;10796;10797;10798;10799;10800;10801;10802;10803;10804;10805;10806;10807;10808;65813;65814;65815;65816;65817;65818;65819;65820;65821;65822;65823;65824;65825;65826;65827;65828;65829;65830;65831;65832;65833;65834;84783;84784;84785;84786;84787;84788;84789;84790;84791;84792;84793;84794;84795;84796;84797;84798;84799;84800;84801;84802;84803;84804;84805;84806;84807;848…	9987;9988;9989;9990;9991;9992;9993;9994;9995;9996;9997;9998;9999;10000;10001;10002;10003;10004;10005;61370;61371;61372;61373;61374;61375;61376;61377;61378;61379;61380;61381;61382;61383;61384;61385;61386;61387;61388;61389;61390;61391;79319;79320;79321;79322;79323;79324;79325;79326;79327;79328;79329;79330;79331;79332;79333;79334;79335;79336;79337;79338;79339;79340;79341;79342;101748;101749;101750;1…	9987;61370;79328;101749;110277;110825;270998;318880;388850;395046;465608;480421;489252;518318;552160;689775;690493
332	sp|O00743|PPP6_HUMAN	sp|O00743|PPP6_HUMAN	Serine/threonine-protein phosphatase 6 catalytic subunit OS=Homo sapiens OX=9606 GN=PPP6C PE=1 SV=1	11	11	11	1	11	11	11	46.2	46.2	46.2	35.144	305	305	0	69.288	AHQLVHEGYK;APLDLDKYVEIAR;CGNIASIMVFK;GAFCDLVWSDPEDVDTWAISPR;GAGWLFGAK;LVTVWSAPNYCYR;QITQVYGFYDECQTK;TGGQVPDTNYIFMGDFVDR;VTNEFVHINNLK;YGNANAWR;YLPENDLKR		2017;3728;5824;15988;16027;35085;41170;49199;56379;58435;58936	True;True;True;True;True;True;True;True;True;True;True	2180;4073;6342;17477;17521;38291;45673;54423;62372;64602;65142	25285;25286;25287;25288;25289;25290;25291;25292;25293;25294;25295;25296;25297;25298;25299;25300;25301;25302;25303;25304;25305;25306;25307;25308;25309;25310;25311;25312;25313;25314;25315;25316;25317;25318;25319;48033;48034;48035;48036;48037;48038;48039;48040;48041;48042;48043;48044;48045;48046;48047;48048;48049;48050;48051;48052;48053;48054;48055;48056;48057;48058;48059;48060;48061;48062;75811;758…	23576;23577;23578;23579;23580;23581;23582;23583;23584;23585;23586;23587;23588;23589;23590;23591;23592;23593;23594;23595;23596;23597;23598;23599;23600;23601;23602;23603;23604;23605;23606;23607;23608;44662;44663;44664;44665;44666;44667;44668;44669;44670;44671;44672;44673;44674;44675;44676;44677;44678;44679;44680;44681;44682;44683;44684;44685;44686;44687;44688;44689;44690;44691;44692;70695;70696;706…	23587;44685;70698;190256;190820;433507;508044;603874;698044;723356;729826
333	sp|O00746|NDKM_HUMAN	sp|O00746|NDKM_HUMAN	Nucleoside diphosphate kinase, mitochondrial OS=Homo sapiens OX=9606 GN=NME4 PE=1 SV=1	2	2	2	1	2	2	2	12.3	12.3	12.3	20.658	187	187	0.0039427	2.7325	KPFYPALIR;NVIHASDSVEGAQR		27063;39317	True;True	29571;43668	355902;355903;355904;355905;355906;355907;355908;355909;355910;522645;522646;522647;522648;522649;522650	331979;331980;331981;331982;331983;331984;487550;487551;487552	331979;487552
334	sp|O00754|MA2B1_HUMAN	sp|O00754|MA2B1_HUMAN	Lysosomal alpha-mannosidase OS=Homo sapiens OX=9606 GN=MAN2B1 PE=1 SV=3	13	13	13	1	13	13	13	17.8	17.8	17.8	113.74	1011	1011	0	28.098	ASTSLKPPTADLFTGVLPNGYNPPR;DGSLELMVHR;ELVDYFLNVATAQGR;FDTPLETK;FQVIVYNPLGR;GSSVHVLYSTPACYLWELNK;HLELEWSVGPIPVGDTWGK;HLVLLDTAQAAAAGHR;LEHQFAVGEDSGR;LPVSEGVFVVK;LQETTLVANQLR;VAWHIDPFGHSR;WAQIHLVK		4499;7078;11500;13507;15113;19087;20602;20776;28981;32922;33112;52428;57261	True;True;True;True;True;True;True;True;True;True;True;True;True	4906;7712;12503;14728;16512;20851;22488;22680;31641;35957;36159;58005;63329	58830;58831;58832;91598;91599;91600;146947;146948;146949;146950;146951;146952;172076;172077;192639;192640;192641;192642;192643;192644;192645;192646;192647;192648;244323;244324;265384;268184;268185;268186;268187;268188;268189;268190;268191;268192;268193;268194;268195;382899;382900;382901;382902;382903;435608;437953;437954;437955;437956;437957;437958;437959;437960;437961;437962;437963;437964;437965…	54832;85718;85719;137328;137329;137330;137331;137332;160620;179616;179617;179618;179619;179620;179621;179622;179623;227609;227610;247320;250044;250045;250046;250047;250048;250049;250050;250051;250052;250053;250054;357244;406836;409019;409020;409021;409022;409023;409024;409025;409026;409027;409028;409029;409030;409031;409032;409033;646570;646571;646572;646573;709237;709238	54832;85718;137329;160620;179620;227610;247320;250054;357244;406836;409020;646571;709237
335	sp|O00762|UBE2C_HUMAN	sp|O00762|UBE2C_HUMAN	Ubiquitin-conjugating enzyme E2 C OS=Homo sapiens OX=9606 GN=UBE2C PE=1 SV=1	3	3	3	1	3	3	3	21.2	21.2	21.2	19.652	179	179	0	7.9075	GISAFPESDNLFK;LSLEFPSGYPYNAPTVK;YLQETYSK		17485;33915;58950	True;True;True	19098;37021;65158	223921;223922;223923;223924;223925;223926;223927;223928;223929;223930;223931;223932;223933;223934;448129;448130;448131;448132;448133;783078;783079;783080;783081	208643;208644;208645;208646;208647;208648;208649;208650;208651;208652;208653;208654;208655;418403;418404;418405;418406;729977;729978	208651;418404;729978
336	sp|O00764|PDXK_HUMAN	sp|O00764|PDXK_HUMAN	Pyridoxal kinase OS=Homo sapiens OX=9606 GN=PDXK PE=1 SV=1	15	15	15	1	15	15	15	60.3	60.3	60.3	35.102	312	312	0	129.56	AQAGEGVRPSPMQLELR;DKSFLAMVVDIVQELK;EKVVPLADIITPNQFEAELLSGR;GQVLNSDELQELYEGLR;IHSQEEALR;LNNMNKYDYVLTGYTR;LVYVCDPVLGDKWDGEGSMYVPEDLLPVYK;NPAGSVVMER;SFLAMVVDIVQELK;TVSTLHHVLQR;VDAVFVGTGDLFAAMLLAWTHKHPNNLK;VLSIQSHVIR;VVPLADIITPNQFEAELLSGR;VVPLADIITPNQFEAELLSGRK;YDYVLTGYTR		3874;7517;10921;18783;22912;32412;35135;38615;44764;51759;52527;54829;56843;56844;58093	True;True;True;True;True;True;True;True;True;True;True;True;True;True;True	4233;4234;8180;8181;11887;20528;24997;35410;38349;38350;42888;42889;49539;57261;58108;60627;62881;62882;64231	50109;50110;50111;50112;50113;50114;50115;50116;50117;50118;50119;50120;50121;97352;97353;97354;97355;97356;97357;140221;240650;240651;240652;240653;240654;240655;240656;240657;240658;240659;240660;240661;240662;240663;240664;240665;240666;240667;240668;240669;298773;298774;298775;298776;298777;298778;298779;298780;298781;298782;298783;429628;429629;429630;429631;465063;465064;513682;513683;51368…	46616;46617;46618;46619;46620;46621;46622;46623;46624;46625;46626;91015;91016;91017;91018;91019;91020;131265;224252;224253;224254;224255;224256;224257;224258;224259;224260;224261;224262;224263;224264;224265;224266;224267;224268;224269;224270;224271;224272;278837;278838;278839;278840;278841;278842;278843;278844;278845;278846;278847;401248;401249;401250;434227;434228;479251;479252;479253;479254;479…	46617;91017;131265;224264;278837;401249;434227;479256;549181;636710;647653;677640;704528;704549;718918	511;512;513	93;126;287
337	sp|O00767|SCD_HUMAN	sp|O00767|SCD_HUMAN	Stearoyl-CoA desaturase OS=Homo sapiens OX=9606 GN=SCD PE=1 SV=2	6	6	6	1	6	6	6	28.1	28.1	28.1	41.522	359	359	0	38.248	ENILVSLGAVGEGFHNYHHSFPYDYSASEYR;FSETHADPHNSR;FSETHADPHNSRR;GFFFSHVGWLLVR;GSTLDLSDLEAEKLVMFQR;PAHLLQDDISSSYTTTTTITAPPSR		11691;15224;15225;16732;19099;39623	True;True;True;True;True;True	12743;16633;16634;18281;20865;43999	149424;149425;194014;194015;194016;194017;194018;194019;213631;213632;213633;244487;526622	139677;139678;180870;180871;180872;180873;180874;180875;199033;199034;199035;227760;227761;491262	139677;180871;180875;199034;227761;491262
338	sp|O14494|PLPP1_HUMAN	sp|O14494|PLPP1_HUMAN	Phospholipid phosphatase 1 OS=Homo sapiens OX=9606 GN=PLPP1 PE=1 SV=1	4	4	4	1	4	4	4	22.5	22.5	22.5	32.156	284	284	0	16.74	AIGTFLFGAAASQSLTDIAK;GVFCNDESIK;KEEDSHTTLHETPTTGNHYPSNHQP;NNYIATIYK		2189;19399;26065;38611	True;True;True;True	2368;21185;28484;42884	27728;27729;27730;27731;27732;27733;27734;27735;27736;27737;248343;248344;248345;248346;342170;342171;513667;513668;513669;513670;513671;513672;513673;513674;513675	25852;25853;25854;25855;25856;25857;25858;25859;25860;25861;231325;231326;231327;319452;319453;479238;479239;479240;479241;479242;479243;479244;479245	25855;231326;319452;479240
339	sp|O14495|PLPP3_HUMAN	sp|O14495|PLPP3_HUMAN	Phospholipid phosphatase 3 OS=Homo sapiens OX=9606 GN=PLPP3 PE=1 SV=1	2	2	2	1	2	2	2	7.1	7.1	7.1	35.116	311	311	0.0010996	3.4638	EILSPVDIIDR;TTLSLPAPAIR		10697;51340	True;True	11645;56804	137263;137264;137265;677172;677173;677174;677175;677176;677177;677178;677179;677180;677181;677182	128479;128480;128481;631239;631240;631241;631242;631243;631244;631245;631246;631247;631248;631249	128481;631242
340	sp|O14497|ARI1A_HUMAN	sp|O14497|ARI1A_HUMAN	AT-rich interactive domain-containing protein 1A OS=Homo sapiens OX=9606 GN=ARID1A PE=1 SV=3	6	6	6	1	6	6	6	3.4	3.4	3.4	242.04	2285	2285	0	8.1134	AAGPGLGNVAMGPR;ALLALAK;FPFGISPAQSHR;QSTGSAPQGPAYHGVNR;RPAGGPQNQFPFQFGR;VQEFDSGLLHWR		246;2898;14917;42256;43435;55633	True;True;True;True;True;True	257;3135;16300;46848;48102;61564	2597;37443;37444;37445;37446;190212;190213;190214;557373;557374;572715;572716;572717;572718;572719;572720;572721;572722;572723;572724;572725;738625;738626;738627;738628;738629	2392;34839;34840;177362;177363;519430;533632;533633;533634;533635;533636;533637;533638;533639;533640;533641;688648;688649;688650;688651	2392;34839;177362;519430;533633;688651	514	1273
341	sp|O14530|TXND9_HUMAN	sp|O14530|TXND9_HUMAN	Thioredoxin domain-containing protein 9 OS=Homo sapiens OX=9606 GN=TXNDC9 PE=1 SV=2	6	6	6	1	6	6	6	36.7	36.7	36.7	26.534	226	226	0	11.821	ESENVVCHFYR;HLAILSK;LGSSDILNYSGNLMEPPFQNQK;LVEEHLDSEIQKLDQMDEDELER;VIPTLALLK;VLEHQLLQTTK		12200;20554;30004;34686;53950;54359	True;True;True;True;True;True	13295;22435;32763;37862;59671;60115	155092;155093;155094;155095;155096;155097;155098;155099;155100;155101;155102;155103;264733;264734;264735;264736;264737;264738;264739;264740;264741;264742;264743;264744;264745;264746;264747;397020;397021;458163;714751;714752;714753;714754;714755;721074;721075;721076;721077;721078;721079;721080;721081;721082;721083;721084;721085;721086;721087;721088;721089;721090;721091;721092;721093;721094;721095;…	144856;144857;144858;144859;144860;144861;144862;144863;144864;144865;144866;246739;246740;246741;246742;246743;246744;246745;246746;246747;246748;246749;370551;370552;427653;666482;666483;666484;666485;666486;672361;672362;672363;672364;672365;672366;672367;672368;672369;672370;672371;672372;672373;672374;672375;672376;672377;672378;672379;672380;672381;672382;672383;672384;672385;672386;672387;…	144856;246745;370551;427653;666482;672383
342	sp|O14548|CO72L_HUMAN	sp|O14548|CO72L_HUMAN	Cytochrome c oxidase subunit 7A2-like, mitochondrial OS=Homo sapiens OX=9606 GN=COX7A2L PE=1 SV=2	2	2	2	1	2	2	2	19.3	19.3	19.3	12.615	114	114	0.00023364	4.4386	GLPDQMLYR;LTSDSTVYDYAGK		17991;34501	True;True	19631;19632;37664	230041;230042;230043;230044;230045;230046;230047;230048;230049;230050;230051;230052;230053;230054;455471;455472;455473;455474;455475;455476;455477;455478;455479;455480	214289;214290;214291;214292;214293;214294;214295;214296;214297;214298;214299;214300;425132;425133;425134;425135;425136;425137;425138;425139;425140	214289;425132	515	85
343	sp|O14558|HSPB6_HUMAN	sp|O14558|HSPB6_HUMAN	Heat shock protein beta-6 OS=Homo sapiens OX=9606 GN=HSPB6 PE=1 SV=2	9	9	9	1	9	9	9	78.8	78.8	78.8	17.135	160	160	0	57.98	APSVALPVAQVPTDPGHFSVLLDVK;ASAPLPGLSAPGR;HEERPDEHGFVAR;HFSPEEIAVK;LPPGVDPAAVTSALSPEGVLSIQAAPASAQAPPPAAAK;MEIPVPVQPSWLR;RASAPLPGLSAPGR;VVGEHVEVHAR;YRLPPGVDPAAVTSALSPEGVLSIQAAPASAQAPPPAAAK		3811;4220;20031;20187;32764;35790;42790;56677;59357	True;True;True;True;True;True;True;True;True	4163;4606;21876;22045;35789;39185;39186;47420;62701;65616	49296;55280;55281;55282;55283;55284;55285;55286;55287;55288;55289;55290;55291;55292;55293;55294;55295;55296;55297;256735;256736;256737;256738;256739;256740;256741;256742;256743;256744;256745;256746;256747;256748;256749;256750;256751;256752;256753;256754;256755;256756;256757;256758;256759;256760;256761;256762;256763;256764;256765;256766;259290;259291;259292;259293;259294;259295;259296;259297;25929…	45834;45835;51608;51609;51610;51611;51612;51613;51614;51615;51616;51617;51618;51619;239199;239200;239201;239202;239203;239204;239205;239206;239207;239208;239209;239210;239211;239212;239213;239214;239215;239216;239217;239218;239219;239220;239221;239222;239223;239224;239225;239226;241634;241635;241636;241637;241638;241639;241640;241641;241642;241643;241644;241645;241646;241647;241648;241649;241650;…	45835;51614;239220;241635;405269;441864;525921;702101;735050	516	1
344	sp|O14561|ACPM_HUMAN	sp|O14561|ACPM_HUMAN	Acyl carrier protein, mitochondrial OS=Homo sapiens OX=9606 GN=NDUFAB1 PE=1 SV=3	3	3	3	1	3	3	3	21.2	21.2	21.2	17.417	156	156	0.00023491	4.5442	LMCPQEIVDYIADKK;LSVNSHFMK;LYDKIDPEK		32121;34144;35268	True;True;True	35040;35041;37264;37265;38487	425505;425506;425507;425508;425509;425510;450984;450985;450986;450987;450988;450989;450990;450991;450992;450993;450994;450995;450996;450997;450998;450999;451000;451001;466161;466162;466163;466164;466165;466166;466167;466168;466169;466170;466171;466172;466173;466174;466175;466176;466177;466178;466179;466180	397424;397425;397426;397427;397428;421069;421070;421071;421072;421073;421074;421075;421076;421077;421078;421079;421080;421081;421082;421083;421084;435215;435216;435217;435218;435219;435220;435221;435222;435223;435224;435225;435226;435227;435228;435229	397426;421084;435219	517;518	105;139
345	sp|O14562|UBFD1_HUMAN	sp|O14562|UBFD1_HUMAN	Ubiquitin domain-containing protein UBFD1 OS=Homo sapiens OX=9606 GN=UBFD1 PE=1 SV=2	6	6	6	1	6	6	6	21.4	21.4	21.4	33.382	309	309	0	31.523	FPLDSTGSELK;HDVKFPLDSTGSELK;IMVVGSTINDVLAVNTPK;LEQDQLWIGTK;LPTVPLSGMYNK;TEKLPMGSIK		14939;20003;24064;29086;32885;48829	True;True;True;True;True;True	16322;21845;26291;31754;35917;35918;54019	190493;256319;256320;256321;256322;256323;315861;315862;315863;315864;315865;315866;315867;315868;315869;315870;315871;384026;384027;384028;384029;384030;384031;384032;384033;384034;384035;384036;435252;435253;435254;435255;435256;435257;435258;435259;435260;435261;435262;435263;435264;435265;643072;643073;643074;643075;643076;643077	177666;238786;238787;238788;294809;294810;294811;294812;294813;294814;294815;294816;294817;294818;358256;358257;358258;358259;358260;358261;358262;358263;358264;406509;406510;406511;406512;406513;406514;406515;406516;406517;406518;406519;406520;406521;406522;599208;599209;599210;599211;599212	177666;238788;294816;358259;406517;599208	519	221
346	sp|O14576|DC1I1_HUMAN	sp|O14576|DC1I1_HUMAN	Cytoplasmic dynein 1 intermediate chain 1 OS=Homo sapiens OX=9606 GN=DYNC1I1 PE=1 SV=2	3	1	1	1	3	1	1	9.8	5.3	5.3	72.955	645	645	0.0017324	3.2247	FHPNLVVGGTYSGQIVLWDNR;LAQIREEK;TPLSAAAHTHPVYCVNVVGTQNAHNLITVSTDGK		14038;28137;50660	False;False;True	15310;30737;56046	179032;179033;179034;179035;179036;179037;179038;179039;372362;372363;372364;372365;372366;372367;372368;372369;372370;372371;372372;372373;372374;372375;372376;372377;372378;372379;372380;372381;372382;372383;668373;668374;668375	167061;167062;167063;167064;167065;347280;347281;347282;347283;347284;347285;347286;347287;347288;347289;347290;347291;347292;347293;347294;347295;347296;347297;347298;347299;347300;347301;622998;622999;623000	167064;347289;623000
347	sp|O14578|CTRO_HUMAN	sp|O14578|CTRO_HUMAN	Citron Rho-interacting kinase OS=Homo sapiens OX=9606 GN=CIT PE=1 SV=2	14	14	14	1	14	14	14	7.1	7.1	7.1	231.43	2027	2027	0	14.245	AESLSDKLNDLEK;ASTEATELLQNIR;AYLDIPNPR;IQELQEK;LAAEEFKR;LAANSSLFTQR;LVDFGSAAK;NPLDAGAAEPIASR;SESVVSGLDSPAK;SEVDHLRR;SLVGCGHFAEVQVVR;SPFAEGTSAR;TLYLLAPSFPDK;TLYLLAPSFPDKQR		1272;4491;5497;24473;27697;27727;34646;38688;44620;44640;46266;46611;50319;50320	True;True;True;True;True;True;True;True;True;True;True;True;True;True	1369;4897;5992;26738;30248;30279;37817;42968;49382;49404;51174;51581;55643;55644	14688;14689;14690;14691;58776;71301;71302;71303;71304;71305;71306;71307;320834;320835;320836;320837;320838;320839;320840;320841;320842;320843;320844;320845;320846;320847;320848;320849;320850;320851;320852;320853;320854;320855;320856;320857;320858;320859;320860;320861;320862;320863;320864;320865;320866;320867;320868;320869;320870;366209;366562;366563;366564;366565;457485;514600;514601;514602;51460…	13608;54786;66457;66458;66459;66460;66461;66462;66463;299558;299559;299560;299561;299562;299563;299564;299565;299566;299567;299568;299569;299570;299571;299572;299573;299574;299575;299576;299577;299578;299579;299580;299581;299582;299583;299584;299585;299586;299587;299588;299589;299590;299591;299592;299593;299594;299595;299596;299597;299598;299599;341590;341893;427027;480117;480118;480119;480120;48…	13608;54786;66460;299597;341590;341893;427027;480118;547838;548044;568339;572457;618634;618635
348	sp|O14579|COPE_HUMAN	sp|O14579|COPE_HUMAN	Coatomer subunit epsilon OS=Homo sapiens OX=9606 GN=COPE PE=1 SV=3	20	20	20	1	20	20	20	88.6	88.6	88.6	34.482	308	308	0	323.31	ALHQGDSLECTAMTVQILLK;APPAPGPASGGSGEVDELFDVK;CSPTLLLLNGQAACHMAQGR;DSGYPETLVNLIVLSQHLGKPPEVTNR;DSIVAELDR;DSIVAELDREMSR;DVERDVFLYR;ENDFDRLVLQYAPSA;FGVVLDEIKPSSAPELQAVR;LDRLDLAR;LQDAYYIFQEMADK;LSSPERDVER;LVLQYAPSA;MFADYLAHESR;MFADYLAHESRR;MQDLDEDATLTQLATAWVSLATGGEK;NAFYIGSYQQCINEAQR;RMQDLDEDATLTQLATAWVSLATGGEK;SVDVTNTTFLLMAASIYLHDQNPDAALR;WEAAEGLLQEALDK		2842;3758;6218;8518;8530;8531;8806;11654;13984;28702;33011;34077;34866;35864;35865;36580;37071;43396;47744;57315	True;True;True;True;True;True;True;True;True;True;True;True;True;True;True;True;True;True;True;True	3076;3077;4106;6776;6777;9287;9299;9300;9301;9592;12705;15252;31349;36048;36049;37196;38050;39301;39302;39303;39304;40426;41176;48061;52816;52817;63385	36575;36576;36577;36578;36579;36580;36581;36582;36583;36584;36585;36586;36587;36588;36589;48460;48461;48462;48463;48464;48465;48466;48467;48468;48469;48470;48471;48472;48473;48474;48475;48476;48477;48478;48479;48480;48481;48482;48483;48484;48485;48486;48487;48488;48489;48490;80384;80385;80386;80387;80388;80389;80390;80391;80392;80393;80394;80395;80396;80397;110194;110195;110196;110197;110198;1101…	34042;34043;34044;34045;34046;34047;34048;34049;34050;34051;34052;45068;45069;45070;45071;45072;45073;45074;45075;45076;45077;45078;45079;45080;45081;45082;45083;45084;45085;45086;45087;45088;45089;45090;45091;45092;45093;45094;45095;45096;45097;45098;45099;74995;74996;74997;74998;74999;75000;75001;75002;75003;75004;75005;75006;75007;75008;75009;103183;103184;103185;103186;103187;103188;103189;10…	34050;45074;74995;103187;103291;103294;106885;139296;166295;354485;407836;420450;429856;442800;442853;453521;460834;533346;585727;709938	520;521;522;523;524;525;526	86;108;122;151;172;208;227
349	sp|O14602|IF1AY_HUMAN	sp|O14602|IF1AY_HUMAN	Eukaryotic translation initiation factor 1A, Y-chromosomal OS=Homo sapiens OX=9606 GN=EIF1AY PE=1 SV=4	8	2	2	1	8	2	2	44.4	7.6	7.6	16.442	144	144	0.00045167	3.8492	AYGELPEHAK;DYQDNKADVILK;EDGQEYAQVIK;ELVFKEDGQEYAQVIK;KVWINTSDIILVGLR;LEALCFDGVK;LEALCFDGVKR;VWINTSDIILVGLR		5463;9080;9663;11504;27574;28794;28795;57035	False;False;False;False;False;True;True;False	5954;9892;10531;12507;30116;31447;31448;63091	70698;70699;70700;70701;70702;70703;70704;70705;70706;70707;70708;70709;70710;70711;70712;70713;70714;70715;70716;70717;70718;70719;70720;70721;70722;70723;70724;70725;70726;70727;70728;70729;70730;70731;70732;70733;70734;70735;70736;70737;117329;117330;117331;117332;117333;117334;117335;117336;117337;125104;125105;125106;125107;125108;125109;125110;125111;125112;125113;125114;125115;125116;12511…	65893;65894;65895;65896;65897;65898;65899;65900;65901;65902;65903;65904;65905;65906;65907;65908;65909;65910;65911;65912;65913;65914;65915;65916;65917;65918;65919;65920;65921;65922;65923;65924;65925;109892;109893;109894;109895;109896;109897;117258;117259;117260;117261;117262;117263;117264;117265;117266;117267;137361;137362;137363;137364;137365;137366;340054;355363;355364;355365;355366;355367;35536…	65895;109893;117266;137361;340054;355367;355374;706697
350	sp|O14613|BORG1_HUMAN	sp|O14613|BORG1_HUMAN	Cdc42 effector protein 2 OS=Homo sapiens OX=9606 GN=CDC42EP2 PE=1 SV=1	2	2	2	1	2	2	2	18.1	18.1	18.1	22.483	210	210	0.0002482	5.8468	ELPDGPSPLLK;NAISLPVIGGPQALTLPTAQAPPKPPR		11342;37100	True;True	12338;41205	145140;494111;494112;494113;494114;494115;494116;494117;494118;494119	135655;461095;461096;461097;461098;461099;461100;461101;461102;461103	135655;461097
351	sp|O14617|AP3D1_HUMAN	sp|O14617|AP3D1_HUMAN	AP-3 complex subunit delta-1 OS=Homo sapiens OX=9606 GN=AP3D1 PE=1 SV=1	33	33	33	1	33	33	33	38	38	38	130.16	1153	1153	0	129.49	AEGTTYRDELLTK;ALDIDLDKPLADSEK;ALDLLYGMVSK;ASCILQLVK;AVFHEEEQR;CSDSTLLSNLLEEMK;DLANDIMTLMSHTKPYIR;DLILQCLDDKDESIR;DVPVAEEVSALFAGELNPVAPK;FAVSQMSALLDSAHLLASSTQR;GMELSVLDSLNAR;GTLSFIAK;HGHLIAAQMLDVAIR;HRPSEADEEELAR;ICFHHHFSVVER;ILIEDSDQNLK;KFAVSQMSALLDSAHLLASSTQR;KQEQANNPFYIK;LEDPDPGVQSAAVNVICELAR;LFGALTPLEPR;LHFSCSSYLITTPCYSDAFAK;LMTSSTNNWVLIK;LYASILQQK;MSFQNLLAK;NDEGATHEKLDFR;NYLSLAPLFFK;SIQGHHVCL…		1096;2620;2631;4239;5005;6188;7569;7746;8913;13329;18171;19255;20260;21077;21835;23651;26168;27194;28855;29296;30150;32231;35250;36702;37264;39561;45458;52703;56468;58682;58854;59177;59253	True;True;True;True;True;True;True;True;True;True;True;True;True;True;True;True;True;True;True;True;True;True;True;True;True;True;True;True;True;True;True;True;True	1180;2841;2852;2853;4626;5454;6743;8238;8424;9707;14533;14534;19829;19830;21028;22122;23021;23843;25794;28588;29712;31513;31981;32926;35206;35207;38469;40608;41387;43935;50305;58297;58298;62466;64869;65052;65053;65422;65506	12879;12880;33640;33733;33734;33735;33736;33737;33738;33739;33740;33741;33742;33743;33744;33745;33746;33747;33748;33749;33750;33751;33752;55492;55493;55494;55495;55496;55497;55498;55499;55500;65129;65130;65131;65132;65133;65134;65135;65136;65137;65138;65139;65140;65141;80042;80043;80044;80045;98029;98030;98031;98032;98033;100202;100203;100204;100205;100206;100207;100208;100209;100210;100211;10021…	11964;11965;31313;31400;31401;31402;31403;31404;31405;31406;31407;31408;31409;31410;31411;31412;31413;31414;31415;31416;31417;31418;31419;31420;51801;51802;51803;51804;51805;51806;51807;60682;60683;60684;60685;60686;60687;60688;60689;60690;60691;60692;60693;74682;74683;74684;91662;91663;91664;91665;93740;93741;93742;93743;93744;93745;93746;93747;93748;93749;93750;93751;107995;107996;107997;107998…	11964;31313;31411;51804;60685;74684;91664;93747;107997;158607;216720;229291;242801;254411;266168;289180;320630;333708;356000;360603;372592;398849;435090;455234;463408;490578;557847;649735;698987;726691;728786;732859;733953	527;528;529;530;531;532	229;327;367;459;964;1106
352	sp|O14618|CCS_HUMAN	sp|O14618|CCS_HUMAN	Copper chaperone for superoxide dismutase OS=Homo sapiens OX=9606 GN=CCS PE=1 SV=1	7	7	7	1	7	7	7	29.2	29.2	29.2	29.04	274	274	0	10.952	FLQLTPER;GMGSGQLQNLGAAVAILGGPGTVQGVVR;LACGIIAR;MEDEQLKVWDVIGR;SAGLFQNPK;SLIIDEGEDDLGR;VWDVIGR		14611;18181;27751;35738;43930;45930;57017	True;True;True;True;True;True;True	15938;19847;19848;30306;39106;48633;50809;63073	186376;186377;186378;186379;186380;186381;186382;186383;186384;186385;186386;186387;232710;232711;232712;232713;232714;232715;367048;367049;367050;367051;367052;367053;367054;367055;367056;472682;579656;579657;579658;579659;579660;579661;579662;605953;605954;605955;605956;605957;605958;757914;757915;757916;757917;757918;757919	173823;173824;173825;173826;173827;173828;173829;173830;173831;173832;173833;216847;216848;216849;216850;216851;216852;342343;342344;342345;342346;342347;342348;342349;342350;342351;441246;540179;540180;540181;540182;540183;540184;564705;564706;564707;564708;564709;564710;706531;706532;706533;706534	173830;216852;342349;441246;540181;564705;706531	533	78
353	sp|O14641|DVL2_HUMAN;sp|Q92997|DVL3_HUMAN	sp|O14641|DVL2_HUMAN	Segment polarity protein dishevelled homolog DVL-2 OS=Homo sapiens OX=9606 GN=DVL2 PE=1 SV=1	4;1	4;1	4;1	2	4	4	4	9.4	9.4	9.4	78.947	736	736;716	0	24.451	DIVHKPGPIVLTVAK;FSSSTEQSSASR;ITIPNAFLGSDVVDWLYHHVEGFPERR;VIYHLDEEETPYLVK		7406;15380;25167;54045	True;True;True;True	8064;16810;27515;59776	95962;95963;95964;95965;95966;95967;95968;195919;195920;195921;195922;195923;195924;195925;195926;329959;329960;716150;716151;716152	89762;89763;89764;89765;89766;89767;182626;182627;182628;182629;182630;182631;182632;308017;667813	89764;182630;308017;667813
354	sp|O14653|GOSR2_HUMAN	sp|O14653|GOSR2_HUMAN	Golgi SNAP receptor complex member 2 OS=Homo sapiens OX=9606 GN=GOSR2 PE=1 SV=2	8	8	8	1	8	8	8	48.6	48.6	48.6	24.775	212	212	0	46.957	ILDIANMLGLSNTVMR;LRVDQLK;MDPLFQQTHK;QREELLSR;QSVHIVENEIQASIDQIFSR;QVHEIQSCMGR;VHNGMDDLILDGHNILDGLR;YDVQHLQTALR		23476;33631;35699;42115;42271;42467;53663;58084	True;True;True;True;True;True;True;True	25604;25605;36716;39051;46699;46863;47072;47073;59340;59341;64222	307402;307403;307404;307405;307406;307407;307408;307409;444570;444571;444572;444573;444574;444575;444576;444577;444578;444579;444580;444581;472140;472141;472142;472143;472144;472145;472146;472147;472148;472149;472150;472151;472152;472153;472154;555925;555926;555927;555928;555929;555930;555931;555932;555933;555934;557615;557616;557617;557618;560287;560288;560289;560290;560291;560292;560293;560294;…	286937;286938;286939;286940;286941;286942;286943;286944;415094;415095;415096;415097;415098;415099;415100;415101;415102;415103;415104;440728;440729;440730;440731;440732;440733;440734;440735;440736;440737;440738;440739;440740;440741;440742;518121;518122;518123;518124;518125;518126;518127;518128;518129;519668;519669;519670;519671;522115;522116;522117;522118;522119;522120;522121;522122;522123;522124;…	286942;415100;440735;518121;519670;522116;662110;718855	534;535;536	19;137;179
355	sp|O14656|TOR1A_HUMAN	sp|O14656|TOR1A_HUMAN	Torsin-1A OS=Homo sapiens OX=9606 GN=TOR1A PE=1 SV=1	11	11	11	1	11	11	11	35.8	35.8	35.8	37.808	332	332	0	27.529	AMFIFLSNAGAER;GYEIDEDIVSR;IILNAVFGFINNPKPK;ITDVALDFWR;KIILNAVFGFINNPK;KPLTLSLHGWTGTGK;LKDIEHALSVSVFNNK;LYCLFAECCGQK;NSGFWHSSLIDR;VAEEMTFFPK;VAEEMTFFPKEER		3370;19704;23118;25093;26533;27100;30726;35257;38948;52098;52099	True;True;True;True;True;True;True;True;True;True;True	3662;3663;21523;25222;27433;28986;29611;33552;38476;43256;57639;57640;57641	43747;43748;43749;43750;43751;43752;43753;43754;43755;43756;43757;43758;43759;43760;43761;252711;252712;252713;252714;252715;252716;252717;252718;252719;301890;301891;301892;301893;301894;301895;301896;301897;301898;301899;301900;328945;328946;328947;328948;328949;328950;328951;328952;328953;328954;328955;328956;328957;328958;328959;348582;356609;356610;356611;356612;407099;466076;517880;517881;5…	40705;40706;40707;40708;40709;40710;40711;40712;40713;40714;40715;40716;40717;40718;235410;235411;235412;235413;235414;235415;235416;235417;235418;281760;281761;281762;281763;281764;281765;281766;281767;281768;281769;281770;307083;307084;307085;307086;307087;307088;307089;307090;307091;307092;307093;307094;307095;307096;325403;332633;332634;332635;332636;379967;435140;483155;483156;483157;483158;…	40709;235413;281762;307091;325403;332634;379967;435140;483164;641348;641350	537;538	202;304
356	sp|O14657|TOR1B_HUMAN	sp|O14657|TOR1B_HUMAN	Torsin-1B OS=Homo sapiens OX=9606 GN=TOR1B PE=1 SV=2	10	10	10	1	10	10	10	37.8	37.8	37.8	37.978	336	336	0	26.247	AIFIFLSNAGGDLITK;DLEPVLSVGVFNNK;HSGLWHSGLIDK;KPLTLSLHGWAGTGK;LFGQHLATEVIFK;LYQDQLQK;NFVSQIVAENLHPK;SNFVHLFVSTLHFPHEQK;TALDFWR;VAEEMTFFPR		2152;7662;21108;27099;29318;35410;37581;46436;48359;52100	True;True;True;True;True;True;True;True;True;True	2328;8336;23053;29610;32004;38640;41728;51393;53498;57642	27129;27130;27131;27132;27133;99144;99145;99146;99147;99148;99149;99150;99151;99152;99153;99154;99155;99156;99157;99158;273134;273135;273136;273137;273138;273139;273140;273141;273142;273143;273144;356601;356602;356603;356604;356605;356606;356607;356608;386810;386811;386812;386813;386814;386815;467634;467635;467636;467637;467638;500482;500483;500484;500485;500486;500487;500488;500489;500490;500491…	25302;25303;25304;92704;92705;92706;92707;92708;92709;92710;92711;92712;92713;92714;92715;92716;92717;92718;254693;254694;254695;254696;254697;254698;254699;254700;254701;254702;254703;332625;332626;332627;332628;332629;332630;332631;332632;360793;360794;436546;436547;436548;436549;467056;467057;467058;467059;467060;467061;467062;467063;467064;467065;570500;570501;570502;570503;570504;593357;6413…	25302;92709;254694;332630;360794;436548;467060;570502;593357;641352
357	sp|O14662|STX16_HUMAN	sp|O14662|STX16_HUMAN	Syntaxin-16 OS=Homo sapiens OX=9606 GN=STX16 PE=1 SV=3	4	4	4	1	4	4	4	18.8	18.8	18.8	37.031	325	325	0	9.2081	AVQALPSR;HLNRPTLDDSSEEEHAIEITTQEITQLFHR;LTDAFLLLR;QIVQSISDLNEIFR		5213;20697;34199;41177	True;True;True;True	5682;22597;37327;45680	68023;68024;68025;68026;68027;266805;266806;451501;451502;451503;451504;451505;451506;451507;451508;451509;451510;451511;451512;451513;451514;545127	63426;63427;63428;63429;63430;248634;248635;421540;421541;421542;421543;421544;421545;421546;421547;421548;421549;421550;421551;508174	63430;248634;421550;508174
358	sp|O14672|ADA10_HUMAN	sp|O14672|ADA10_HUMAN	Disintegrin and metalloproteinase domain-containing protein 10 OS=Homo sapiens OX=9606 GN=ADAM10 PE=1 SV=1	9	9	9	1	9	9	9	16	16	16	84.141	748	748	0	17.753	AIDTIYQTTDFSGIR;FEGFIQTR;FPNIGVEK;HYEGLSYNVDSLHQK;LDFHAHGR;LPPPKPLPGTLK;LVDADGPLAR;TITLQPGSPCNDFR;VSHITFAHEVGHNFGSPHDSGTECTPGESK		2103;13567;14950;21458;28517;32779;34637;49700;55994	True;True;True;True;True;True;True;True;True	2276;14790;16335;23435;31147;35806;37808;54971;61953	26583;172769;172770;172771;172772;172773;172774;172775;172776;172777;190694;190695;190696;279819;279820;279821;279822;279823;279824;377572;377573;377574;377575;377576;434167;434168;457409;457410;457411;457412;457413;656019;656020;656021;656022;656023;656024;743217;743218;743219;743220	24797;161250;161251;161252;161253;161254;161255;161256;161257;177856;177857;177858;261302;261303;261304;261305;261306;352370;352371;352372;405515;426970;426971;426972;611424;611425;611426;692929;692930;692931	24797;161250;177858;261303;352371;405515;426972;611424;692929
359	sp|O14681|EI24_HUMAN	sp|O14681|EI24_HUMAN	Etoposide-induced protein 2.4 homolog OS=Homo sapiens OX=9606 GN=EI24 PE=1 SV=4	2	2	2	1	2	2	2	5.9	5.9	5.9	38.964	340	340	0.0062538	2.3974	TFLQDLAR;VFIPVLQSVTAR		49034;53137	True;True	54245;58767	645898;645899;645900;645901;645902;645903;645904;645905;645906;645907;702574;702575;702576;702577;702578	601839;601840;601841;601842;601843;601844;601845;601846;601847;655003;655004;655005	601845;655003
360	sp|O14684|PTGES_HUMAN	sp|O14684|PTGES_HUMAN	Prostaglandin E synthase OS=Homo sapiens OX=9606 GN=PTGES PE=1 SV=2	2	2	2	1	2	2	2	13.2	13.2	13.2	17.102	152	152	0.0029467	2.8976	AFANPEDALR;VAHTVAYLGK		1345;52192	True;True	1451;57742	15503;15504;15505;15506;15507;15508;15509;689375;689376;689377;689378;689379;689380;689381;689382;689383	14370;14371;14372;14373;14374;642612;642613;642614;642615;642616;642617;642618	14370;642616
362	sp|O14734|ACOT8_HUMAN	sp|O14734|ACOT8_HUMAN	Acyl-coenzyme A thioesterase 8 OS=Homo sapiens OX=9606 GN=ACOT8 PE=1 SV=1	4	4	4	1	4	4	4	17.2	17.2	17.2	35.914	319	319	0	34.144	HYWVPAK;IAAQEVPIEIKPVNPSPLSQLQR;LFGGQIVGQALVAAAK;LPVLYQVER		21509;21536;29305;32915	True;True;True;True	23490;23518;31990;35949	280673;280674;280940;280941;280942;280943;280944;280945;280946;280947;280948;280949;280950;280951;280952;280953;386680;386681;386682;386683;386684;386685;386686;386687;386688;386689;386690;386691;386692;386693;435535;435536;435537;435538;435539;435540;435541;435542;435543;435544;435545;435546;435547;435548	262135;262136;262383;262384;262385;262386;262387;262388;262389;262390;262391;262392;262393;262394;262395;262396;262397;360687;360688;360689;360690;360691;360692;360693;360694;360695;360696;360697;360698;360699;360700;406768;406769;406770;406771;406772;406773;406774;406775;406776;406777;406778;406779;406780;406781	262135;262388;360687;406770
363	sp|O14735|CDIPT_HUMAN	sp|O14735|CDIPT_HUMAN	CDP-diacylglycerol--inositol 3-phosphatidyltransferase OS=Homo sapiens OX=9606 GN=CDIPT PE=1 SV=1	5	5	5	1	5	5	5	27.2	27.2	27.2	23.539	213	213	0	19.187	FGAMLDMLTDR;MGLWVTAPIALLK;MIDLSGNPVLR;NMAALDAADR;SLISVIHLITAAR		13784;36000;36095;38445;45938	True;True;True;True;True	15027;15028;15029;39506;39507;39655;39656;42672;42673;50817	175381;175382;175383;175384;175385;175386;175387;175388;175389;175390;175391;175392;175393;175394;175395;175396;175397;175398;175399;476619;476620;476621;476622;476623;476624;476625;476626;476627;476628;476629;476630;476631;478033;478034;478035;478036;478037;478038;478039;478040;478041;478042;478043;478044;478045;478046;478047;478048;478049;478050;478051;478052;478053;478054;478055;478056;478057;…	163678;163679;163680;163681;163682;163683;163684;163685;163686;163687;163688;163689;163690;163691;163692;163693;444953;444954;444955;444956;444957;444958;444959;444960;444961;444962;446226;446227;446228;446229;446230;446231;446232;446233;446234;446235;446236;446237;446238;446239;446240;446241;446242;446243;446244;446245;446246;446247;446248;446249;446250;446251;446252;446253;446254;446255;446256;…	163692;444954;446230;476625;564800	539;540;541;542;543	66;69;122;174;201
364	sp|O14737|PDCD5_HUMAN	sp|O14737|PDCD5_HUMAN	Programmed cell death protein 5 OS=Homo sapiens OX=9606 GN=PDCD5 PE=1 SV=3	8	8	8	1	8	8	8	61.6	61.6	61.6	14.285	125	125	0	29.974	ADEELEALRR;AVENYLIQMAR;HGDPGDAAQQEAK;LSNLALVKPEK;NSILAQVLDQSAR;VSEQGLIEILK;VSEQGLIEILKK;YGQLSEK		786;4978;20222;33963;38968;55948;55949;58467	True;True;True;True;True;True;True;True	840;5425;5426;22083;37074;43281;61903;61904;64637	9143;9144;9145;9146;9147;9148;9149;9150;64885;64886;64887;64888;64889;64890;64891;64892;64893;64894;64895;64896;64897;64898;64899;64900;64901;64902;64903;64904;64905;259941;259942;259943;448720;448721;448722;448723;448724;448725;448726;448727;448728;448729;448730;448731;448732;448733;448734;448735;448736;448737;448738;448739;448740;448741;448742;448743;448744;448745;448746;448747;448748;448749;51…	8488;8489;8490;8491;8492;8493;8494;60471;60472;60473;60474;60475;60476;60477;60478;60479;60480;60481;60482;60483;60484;60485;60486;242249;242250;242251;418935;418936;418937;418938;418939;418940;418941;418942;418943;418944;418945;418946;418947;418948;418949;418950;418951;418952;418953;418954;418955;418956;418957;418958;418959;418960;418961;418962;483329;483330;483331;483332;483333;483334;483335;48…	8488;60476;242250;418936;483339;692223;692233;723621	544	77
365	sp|O14744|ANM5_HUMAN	sp|O14744|ANM5_HUMAN	Protein arginine N-methyltransferase 5 OS=Homo sapiens OX=9606 GN=PRMT5 PE=1 SV=4	17	17	17	1	17	17	17	36.3	36.3	36.3	72.683	637	637	0	121.7	AAILPTSIFLTNK;AAILPTSIFLTNKK;AAMAVGGAGGSR;DLNCVPEIADTLGAVAK;DWNTLIVGK;EFCSYLQYLEYLSQNRPPPNAYELFAK;EFIQEPAK;GPLVNASLR;IAVALEIGADLPSNHVIDR;KVWYEWAVTAPVCSAIHNPTGR;LHNFHQLSAPQPCFTFSHPNR;LSPWIRPDSK;QGFDFLCMPVFHPR;TWMWWHNFR;VPLVAPEDLR;VPLVAPEDLRDDIIENAPTTHTEEYSGEEK;YSQYQQAIYK		289;290;389;7850;8995;9955;10018;18505;21769;27576;30217;34008;40799;51854;55472;55473;59478	True;True;True;True;True;True;True;True;True;True;True;True;True;True;True;True;True	305;306;415;8540;9800;10846;10913;20221;23769;30118;32998;37124;45268;57365;61387;61388;65742	3136;3137;3138;3139;3140;3141;3142;3143;3144;3145;3146;3147;3148;3149;3150;3151;3152;3153;3154;3155;3156;3157;3158;3159;3160;3161;3162;4338;101609;101610;101611;101612;101613;101614;101615;101616;101617;116260;116261;116262;116263;116264;116265;116266;116267;116268;116269;116270;116271;116272;116273;116274;116275;128264;128265;128266;128961;128962;128963;128964;128965;128966;237273;237274;237275;…	2900;2901;2902;2903;2904;2905;2906;2907;2908;2909;2910;2911;2912;2913;2914;2915;2916;2917;2918;2919;2920;2921;2922;2923;2924;4024;95026;95027;95028;95029;95030;95031;108878;108879;108880;108881;108882;108883;108884;108885;108886;108887;108888;108889;108890;120192;120837;120838;120839;221122;221123;221124;221125;221126;221127;221128;221129;221130;221131;221132;221133;221134;221135;221136;221137;22…	2902;2923;4024;95029;108878;120192;120839;221131;265326;340065;373377;419621;503646;638057;686294;686305;736303
366	sp|O14745|NHRF1_HUMAN	sp|O14745|NHRF1_HUMAN	Na(+)/H(+) exchange regulatory cofactor NHE-RF1 OS=Homo sapiens OX=9606 GN=NHERF1 PE=1 SV=4	2	2	2	1	2	2	2	6.7	6.7	6.7	38.868	358	358	0.0060545	2.4024	LLVVDPETDEQLQK;LVEPGSPAEK		32064;34706	True;True	34977;37882	424696;458414	396611;427886	396611;427886
367	sp|O14757|CHK1_HUMAN	sp|O14757|CHK1_HUMAN	Serine/threonine-protein kinase Chk1 OS=Homo sapiens OX=9606 GN=CHEK1 PE=1 SV=2	2	2	2	1	2	2	2	4.2	4.2	4.2	54.433	476	476	0.0039362	2.718	ISDFGLATVFR;LIDIVSSQK		24764;30342	True;True	27054;33132	324493;324494;402211;402212;402213	302949;375443	302949;375443
368	sp|O14763|TR10B_HUMAN	sp|O14763|TR10B_HUMAN	Tumor necrosis factor receptor superfamily member 10B OS=Homo sapiens OX=9606 GN=TNFRSF10B PE=1 SV=2	2	2	2	1	2	2	2	7.3	7.3	7.3	47.878	440	440	0	11.165	DASVHTLLDALETLGER;LLVPANEGDPTETLR		6557;32040	True;True	7140;34951	84913;84914;84915;84916;84917;84918;84919;84920;84921;84922;84923;84924;84925;424384;424385;424386;424387	79445;79446;79447;79448;79449;79450;79451;79452;79453;79454;396320;396321;396322	79446;396320
369	sp|O14773|TPP1_HUMAN	sp|O14773|TPP1_HUMAN	Tripeptidyl-peptidase 1 OS=Homo sapiens OX=9606 GN=TPP1 PE=1 SV=2	7	7	7	1	7	7	7	18.5	18.5	18.5	61.247	563	563	0	305.29	AYPDVAALSDGYWVVSNR;ILSGRPPLGFLNPR;LFGGNFAHQASVAR;LYQQHGAGLFDVTR;PSYQEEAVTK;VNTELMK;VPIPWVSGTSASTPVFGGILSLINEHR		5519;23848;29304;35421;40044;55286;55434	True;True;True;True;True;True;True	6015;26018;31989;38651;44449;61179;61346	71579;71580;71581;71582;71583;71584;71585;71586;71587;71588;71589;71590;71591;71592;71593;71594;71595;71596;71597;71598;71599;71600;71601;71602;71603;312722;312723;312724;312725;312726;312727;312728;312729;312730;386656;386657;386658;386659;386660;386661;386662;386663;386664;386665;386666;386667;386668;386669;386670;386671;386672;386673;386674;386675;386676;386677;386678;386679;467731;467732;4677…	66713;66714;66715;66716;66717;66718;66719;66720;66721;66722;66723;66724;66725;66726;66727;66728;66729;66730;66731;66732;66733;66734;66735;66736;66737;291884;291885;291886;291887;291888;291889;291890;360668;360669;360670;360671;360672;360673;360674;360675;360676;360677;360678;360679;360680;360681;360682;360683;360684;360685;360686;436626;436627;436628;436629;436630;436631;436632;436633;495490;4954…	66725;291884;360675;436630;495492;683896;685824
370	sp|O14776|TCRG1_HUMAN;sp|Q5VWI1|TCRGL_HUMAN	sp|O14776|TCRG1_HUMAN	Transcription elongation regulator 1 OS=Homo sapiens OX=9606 GN=TCERG1 PE=1 SV=2	26;1	26;1	26;1	2	26	26	26	22.9	22.9	22.9	123.9	1098	1098;586	0	73.037	AIVPLEAR;AKPVATAPIPGTPWCVVWTGDER;ALLSDMVR;ATFSEFAAK;EALFNEFVAAAR;EEAIQNFK;FNPGELR;GPPPPPTASEPTR;GPPPPPTASEPTRR;GVSAFSTWEK;HPTPTMLSIQK;IKSDFFELLSNHHLDSQSR;KLIQESDQHLK;LFNEHIEALTK;LIQESDQHLKDVEK;LIVAYVDDLDR;LIVAYVDDLDRR;LRHPTPTMLSIQK;LSMWDRPDDLIGR;QLLDETSAITLTSTWK;SDFFELLSNHHLDSQSR;SSDVSWSDTRR;TLESTWEKPQELK;VFFYNPTTR;WESGSLLER;YLVLDCVPEER		2378;2477;2980;4651;9342;9776;14847;18532;18533;19546;20963;23370;26764;29410;30577;30668;30669;33569;33955;41458;44251;47113;49928;53107;57348;59004	True;True;True;True;True;True;True;True;True;True;True;True;True;True;True;True;True;True;True;True;True;True;True;True;True;True	2579;2687;3223;3224;5079;10177;10651;16227;20251;20252;21358;22896;25490;29237;32107;33388;33491;33492;36651;37064;37065;45975;48979;52130;55215;58732;63418;65215	30612;30613;31848;31849;31850;31851;31852;31853;31854;31855;31856;31857;38509;38510;38511;38512;38513;38514;38515;38516;60858;60859;60860;60861;60862;60863;120849;120850;120851;120852;120853;120854;120855;120856;120857;120858;120859;120860;120861;120862;120863;120864;120865;126461;126462;126463;126464;126465;126466;126467;189541;237476;237477;237478;237479;237480;237481;237482;237483;237484;25059…	28600;28601;29693;29694;29695;29696;29697;29698;29699;29700;35826;35827;35828;35829;35830;35831;35832;35833;56722;56723;56724;56725;56726;56727;113219;113220;113221;113222;113223;113224;113225;113226;113227;113228;113229;113230;113231;113232;113233;113234;113235;118520;118521;118522;118523;176754;221306;221307;221308;221309;221310;221311;233449;233450;233451;233452;252495;285544;285545;285546;285…	28600;29696;35827;56727;113226;118521;176754;221306;221311;233451;252495;285546;328451;361852;377946;379322;379340;414409;418824;511104;543545;578249;614267;654559;710243;730691	545;546	555;594
371	sp|O14777|NDC80_HUMAN	sp|O14777|NDC80_HUMAN	Kinetochore protein NDC80 homolog OS=Homo sapiens OX=9606 GN=NDC80 PE=1 SV=1	4	4	4	1	4	4	4	7	7	7	73.912	642	642	0.0062236	2.3388	AQVYVPLKELLNETEEEINK;ASLQGDVQK;HLEEQIAK;LFLDYTIK		4139;4399;20591;29366	True;True;True;True	4517;4797;22477;32056	54156;54157;57764;265146;387459	50573;53886;247098;361396	50573;53886;247098;361396
372	sp|O14786|NRP1_HUMAN	sp|O14786|NRP1_HUMAN	Neuropilin-1 OS=Homo sapiens OX=9606 GN=NRP1 PE=1 SV=3	12	12	12	1	12	12	12	17.6	17.6	17.6	103.13	923	923	0	34.727	ATHGGLGLR;FVSDYETHGAGFSIR;FVTAVGTQGAISK;GIIIQGGK;IAPPPVVSSGPFLFIK;IKPATWETGISMR;LEIWDGFPDVGPHIGR;SFEGNNNYDTPELR;SSSGILSMVFYTDSAIAK;TFCHWEHDNHVQLK;TGPIQDHTGDGNFIYSQADENQK;YDRLEIWDGFPDVGPHIGR		4679;15706;15718;17394;21695;23360;29003;44717;47341;48953;49269;58076	True;True;True;True;True;True;True;True;True;True;True;True	5108;17172;17184;19001;23689;25478;31663;49487;52375;54156;54496;64213	61070;61071;61072;61073;61074;61075;200464;200465;200466;200467;200468;200469;200598;200599;200600;200601;200602;200603;200604;200605;200606;200607;200608;200609;200610;200611;200612;200613;200614;200615;200616;200617;200618;200619;200620;200621;200622;200623;200624;200625;200626;200627;200628;200629;200630;200631;200632;200633;200634;200635;200636;200637;200638;200639;222457;222458;222459;222460…	56931;56932;56933;56934;56935;186833;186834;186835;186836;186948;186949;186950;186951;186952;186953;186954;186955;186956;186957;186958;186959;186960;186961;186962;186963;186964;186965;186966;186967;186968;186969;186970;186971;186972;186973;186974;186975;186976;186977;186978;186979;186980;186981;186982;186983;186984;186985;186986;186987;186988;186989;207223;207224;207225;207226;207227;207228;20722…	56932;186834;186969;207224;264424;285405;357405;548726;580947;600714;604583;718774
373	sp|O14787|TNPO2_HUMAN	sp|O14787|TNPO2_HUMAN	Transportin-2 OS=Homo sapiens OX=9606 GN=TNPO2 PE=1 SV=3	19	14	14	1	19	14	14	30.5	24.3	24.3	101.39	897	897	0	54.474	ALVMLLEVR;ATIGILITTIASK;CSAAALDVLANVFREELLPHLLPLLK;DNEEKDSAFR;EELLPHLLPLLK;EVLASHLVQLIPILVNGMK;GLLFHPEWVVK;ICEDSSELLDSDALNRPLNIMIPK;ILHGFKDQVGEDNWQQFSEQFPPLLK;LGYVCPQEVAPMLQQFIR;LGYVCPQEVAPMLQQFIRPWCTSLR;LIPHMHSIIQYMLQR;LMPPLIQK;NLLILYDAIGTLADSVGHHLNQPEYIQK;QECLNNIGDASSLIR;QSSFALLGDLTK;SHAIACVNQFIMDR;SIACWTLSR;YSEIDIILLK		3270;4687;6177;8079;9874;12784;17916;21826;23627;30098;30099;30551;32199;38257;40524;42241;45178;45279;59400	False;True;True;False;True;True;True;True;True;False;False;True;True;True;True;False;True;True;True	3542;3543;5116;6731;8816;10757;13938;13939;19548;23833;25766;32866;32867;32868;33360;35159;42466;44967;46833;49996;50104;65662	42533;42534;42535;42536;42537;42538;42539;42540;42541;42542;42543;42544;42545;42546;42547;42548;42549;42550;42551;42552;61193;61194;61195;61196;61197;79905;79906;104856;104857;104858;104859;104860;104861;104862;104863;104864;127555;127556;127557;127558;127559;127560;127561;127562;127563;162322;162323;162324;162325;162326;162327;162328;162329;162330;162331;162332;162333;162334;162335;162336;162337…	39606;39607;39608;39609;39610;39611;39612;39613;39614;39615;39616;39617;39618;39619;39620;39621;39622;39623;39624;39625;57036;57037;57038;74556;98138;98139;98140;98141;98142;98143;98144;98145;98146;98147;98148;119539;119540;119541;119542;119543;119544;119545;119546;151589;151590;151591;151592;151593;151594;151595;151596;151597;151598;151599;151600;151601;151602;213513;213514;213515;213516;213517;…	39622;57038;74556;98144;119539;151598;213517;266054;288766;371631;371633;377771;398537;474393;500831;519378;554408;555781;735514	547;548;549	239;306;796
374	sp|O14802|RPC1_HUMAN	sp|O14802|RPC1_HUMAN	DNA-directed RNA polymerase III subunit RPC1 OS=Homo sapiens OX=9606 GN=POLR3A PE=1 SV=2	5	5	5	1	5	5	5	5.8	5.8	5.8	155.64	1390	1390	0.00025253	6.2147	AQENLNPLVVLNLFK;LPPPTILKPVTLWTGK;NNIFYILLR;VVDPIVSNFLQSFETAIEHNKEVEPLLGR;VVVQGIPEVSR		3925;32782;38536;56611;56965	True;True;True;True;True	4289;35809;42801;62631;63014	50714;50715;50716;50717;434180;434181;434182;512732;752223;757315;757316;757317;757318	47205;47206;405526;405527;405528;478368;701247;705982;705983	47205;405526;478368;701247;705982
375	sp|O14807|RASM_HUMAN	sp|O14807|RASM_HUMAN	Ras-related protein M-Ras OS=Homo sapiens OX=9606 GN=MRAS PE=1 SV=2	4	4	4	1	4	4	4	21.6	21.6	21.6	23.846	208	208	0.000254	6.3536	ASFEHVDR;IFVPDYDPTIEDSYLK;LVVVGDGGVGK;SALTIQFFQK		4287;22555;35119;44006	True;True;True;True	4678;24611;38330;48716	55991;55992;55993;55994;55995;293821;293822;293823;464895;464896;464897;464898;464899;464900;580594;580595;580596;580597;580598;580599;580600;580601	52234;52235;52236;52237;274266;274267;434076;434077;434078;434079;434080;541041;541042;541043;541044;541045;541046	52237;274266;434077;541044
376	sp|O14817|TSN4_HUMAN	sp|O14817|TSN4_HUMAN	Tetraspanin-4 OS=Homo sapiens OX=9606 GN=TSPAN4 PE=1 SV=1	3	3	3	1	3	3	3	13.9	13.9	13.9	26.118	238	238	0	63.596	GLHLYGTQGNVGLTNAWSIIQTDFR;YAQQDLK;YAQQDLKK		17866;57934;57935	True;True;True	19495;64051;64052	228642;769160;769161;769162;769163;769164;769165;769166;769167;769168;769169	212995;716973;716974;716975;716976;716977;716978;716979;716980;716981;716982	212995;716974;716980
377	sp|O14818|PSA7_HUMAN;sp|Q8TAA3|PSMA8_HUMAN	sp|O14818|PSA7_HUMAN	Proteasome subunit alpha type-7 OS=Homo sapiens OX=9606 GN=PSMA7 PE=1 SV=1	15;5	15;5	15;5	2	15	15	15	61.7	61.7	61.7	27.887	248	248;256	0	323.31	AITVFSPDGHLFQVEYAQEAVK;AITVFSPDGHLFQVEYAQEAVKK;ALLEVVQSGGK;DIVVLGVEK;DIVVLGVEKK;GRDIVVLGVEK;ICALDDNVCMAFAGLTADAR;ILNPEEIEK;ILNPEEIEKYVAEIEK;KICALDDNVCMAFAGLTADAR;LTVEDPVTVEYITR;LYQTDPSGTYHAWK;NIELAVMR;NYTDEAIETDDLTIK;RPFGISALIVGFDFDGTPR		2359;2360;2927;7426;7427;18800;21806;23760;23761;26479;34553;35425;37809;39585;43461	True;True;True;True;True;True;True;True;True;True;True;True;True;True;True	2558;2559;3164;8084;8085;20547;23809;25923;25924;28928;28929;37720;38657;41975;41976;43961;48129	30291;30292;30293;30294;30295;30296;30297;30298;30299;30300;30301;30302;30303;30304;30305;30306;30307;30308;30309;30310;30311;30312;30313;30314;30315;30316;30317;30318;30319;30320;30321;30322;30323;30324;30325;30326;30327;30328;30329;30330;30331;30332;30333;30334;30335;30336;30337;30338;30339;30340;30341;30342;30343;37914;37915;37916;37917;37918;37919;37920;37921;37922;37923;37924;37925;37926;379…	28286;28287;28288;28289;28290;28291;28292;28293;28294;28295;28296;28297;28298;28299;28300;28301;28302;28303;28304;28305;28306;28307;28308;28309;28310;28311;28312;28313;28314;28315;28316;28317;28318;28319;28320;28321;28322;28323;28324;28325;28326;28327;28328;28329;28330;28331;28332;28333;28334;28335;28336;28337;28338;28339;28340;35296;35297;35298;35299;35300;35301;35302;35303;35304;35305;35306;353…	28292;28325;35313;89983;89992;224465;265793;290964;290976;324770;425984;436685;469452;490874;534706	550;551	71;211
378	sp|O14828|SCAM3_HUMAN	sp|O14828|SCAM3_HUMAN	Secretory carrier-associated membrane protein 3 OS=Homo sapiens OX=9606 GN=SCAMP3 PE=1 SV=3	10	10	10	1	10	10	10	39.2	39.2	39.2	38.287	347	347	0	71.337	AQQEFAAGVFSNPAVR;DGGNPFAEPSELDNPFQDPAVIQHRPSR;ELQHAALGGTATR;EPPPAYEPPAPAPLPPPSAPSLQPSR;ERELQHAALGGTATR;NYGSYSTQASAAAATAELLK;NYGSYSTQASAAAATAELLKK;QYATLDVYNPFETR;QYATLDVYNPFETREPPPAYEPPAPAPLPPPSAPSLQPSR;TAAANAAAGAAENAFR		4068;6993;11397;11860;12099;39530;39531;42654;42655;48219	True;True;True;True;True;True;True;True;True;True	4443;7618;12396;12929;13187;43901;43902;47272;47273;53341	53285;53286;53287;53288;53289;53290;53291;53292;53293;53294;53295;53296;53297;53298;53299;53300;53301;53302;53303;53304;53305;53306;53307;53308;53309;53310;53311;53312;53313;53314;53315;53316;90412;90413;90414;90415;90416;90417;90418;90419;90420;90421;90422;90423;90424;90425;90426;90427;90428;90429;90430;90431;90432;90433;90434;90435;145816;145817;145818;145819;145820;145821;145822;145823;145824;…	49768;49769;49770;49771;49772;49773;49774;49775;49776;49777;49778;49779;49780;49781;49782;49783;49784;49785;49786;49787;49788;49789;49790;49791;49792;84601;84602;84603;84604;84605;84606;84607;84608;84609;84610;84611;84612;84613;84614;84615;84616;84617;84618;84619;84620;84621;136295;136296;136297;136298;136299;136300;136301;136302;136303;136304;136305;136306;136307;136308;136309;136310;136311;1363…	49787;84602;136311;141267;143823;490262;490264;524499;524507;591704
379	sp|O14841|OPLA_HUMAN	sp|O14841|OPLA_HUMAN	5-oxoprolinase OS=Homo sapiens OX=9606 GN=OPLAH PE=1 SV=3	2	2	2	1	2	2	2	1.9	1.9	1.9	137.46	1288	1288	0.0039337	2.7064	GLNLLIR;TGDLLEVQQPVDLGALR		17978;49159	True;True	19616;54379	229895;229896;647597	214152;214153;603438	214152;603438
380	sp|O14874|BCKD_HUMAN	sp|O14874|BCKD_HUMAN	Branched-chain alpha-ketoacid dehydrogenase kinase OS=Homo sapiens OX=9606 GN=BCKDK PE=1 SV=2	4	4	4	1	4	4	4	16.3	16.3	16.3	46.36	412	412	0	7.5556	CLPFIIGCNPTILHVHELYIR;FPFIPMPLDYILPELLK;LTPTMMLYAGR;QLLDDHKDVVTLLAEGLR		5992;14918;34460;41457	True;True;True;True	6523;16301;37621;45974	77726;190215;455014;455015;548316;548317;548318;548319;548320;548321	72472;177364;424721;424722;511098;511099;511100;511101;511102;511103	72472;177364;424721;511102	552	267
381	sp|O14880|MGST3_HUMAN	sp|O14880|MGST3_HUMAN	Glutathione S-transferase 3, mitochondrial OS=Homo sapiens OX=9606 GN=MGST3 PE=1 SV=1	6	6	6	1	6	6	6	50.7	50.7	50.7	16.516	152	152	0	79.43	AHQNTLEVYPPFLFFLAVGGVYHPR;IASGLGLAWIVGR;VEYPIMYSTDPENGHIFNCIQR;VLYAYGYYTGEPSK;VLYAYGYYTGEPSKR;YKVEYPIMYSTDPENGHIFNCIQR		2021;21732;53020;54996;54997;58751	True;True;True;True;True;True	2185;23730;58633;58634;60807;60808;64940;64941	25391;25392;25393;25394;283634;283635;283636;283637;283638;283639;283640;283641;283642;283643;283644;283645;283646;283647;283648;283649;283650;283651;283652;283653;283654;283655;283656;283657;283658;283659;283660;283661;283662;283663;283664;283665;283666;283667;283668;283669;283670;283671;283672;283673;283674;283675;283676;700850;700851;700852;700853;700854;700855;700856;700857;700858;700859;7289…	23681;23682;23683;23684;264890;264891;264892;264893;264894;264895;264896;264897;264898;264899;264900;264901;264902;264903;264904;264905;264906;264907;264908;264909;264910;264911;264912;264913;264914;264915;264916;264917;264918;264919;264920;264921;264922;264923;264924;264925;264926;264927;264928;264929;653393;653394;653395;653396;653397;653398;653399;653400;653401;679652;679653;679654;679655;6796…	23682;264901;653393;679654;679671;727468	553	43
382	sp|O14907|TX1B3_HUMAN	sp|O14907|TX1B3_HUMAN	Tax1-binding protein 3 OS=Homo sapiens OX=9606 GN=TAX1BP3 PE=1 SV=2	4	4	4	1	4	4	4	46.8	46.8	46.8	13.735	124	124	0	56.942	IMQVNGWDMTMVTHDQAR;SYIPGQPVTAVVQR;TDKGIYVTR;VSEGGPAEIAGLQIGDK		24049;48138;48638;55936	True;True;True;True	26267;53249;53808;61890	315596;315597;315598;315599;315600;633769;633770;633771;633772;633773;633774;633775;633776;633777;633778;633779;633780;633781;633782;633783;633784;633785;633786;633787;633788;640895;640896;640897;640898;640899;742324;742325;742326;742327;742328;742329;742330;742331;742332;742333;742334;742335;742336;742337;742338;742339;742340;742341;742342;742343;742344;742345;742346;742347;742348;742349;742350;…	294561;294562;294563;590574;590575;590576;590577;590578;590579;590580;590581;590582;590583;590584;590585;590586;590587;590588;590589;590590;590591;597213;692101;692102;692103;692104;692105;692106;692107;692108;692109;692110;692111;692112;692113;692114;692115;692116;692117;692118;692119;692120;692121;692122;692123;692124;692125;692126;692127;692128	294561;590577;597213;692105
383	sp|O14908|GIPC1_HUMAN;sp|Q8TF64|GIPC3_HUMAN	sp|O14908|GIPC1_HUMAN	PDZ domain-containing protein GIPC1 OS=Homo sapiens OX=9606 GN=GIPC1 PE=1 SV=2	14;1	14;1	14;1	2	14	14	14	64	64	64	36.049	333	333;312	0	89.858	AIEKVDDLLESYMGIR;APPLVENEEAEPGR;DTELAATMVELGK;GGLGVGEPGPLGGGGSGGPQMGLPPPPPALRPR;GPATVEDLPSAFEEK;IKEGSVIDHIHLISVGDMIEAINGQSLLGCR;KAFDMISQR;LPTAEVMFCTLNTHK;LVFHTQLAHGSPTGR;NPDELAEALDER;SAGGRPGSGPQLGTGR;SRGPATVEDLPSAFEEK;VDDLLESYMGIR;VDMDKLLGGQIGLEDFIFAHVK		2121;3764;8654;17044;18382;23305;25851;32864;34731;38629;43925;47044;52544;52668	True;True;True;True;True;True;True;True;True;True;True;True;True;True	2296;4112;9431;18620;18621;20086;25421;28250;35894;35895;37908;42904;48627;52056;58125;58259	26843;26844;26845;26846;26847;26848;26849;48547;48548;48549;48550;48551;48552;48553;48554;48555;48556;48557;48558;112026;112027;112028;217753;217754;217755;217756;217757;217758;217759;217760;217761;217762;217763;217764;235556;235557;235558;235559;235560;235561;235562;304937;304938;304939;339060;435008;435009;435010;435011;435012;435013;435014;435015;435016;435017;458606;458607;458608;458609;45861…	25045;25046;25047;25048;25049;45155;45156;45157;45158;45159;45160;45161;45162;45163;45164;45165;45166;104952;104953;104954;202888;202889;202890;202891;202892;202893;202894;202895;202896;219509;219510;219511;219512;219513;219514;219515;284708;284709;284710;316565;406275;406276;406277;406278;406279;406280;406281;406282;406283;406284;428061;428062;428063;428064;428065;428066;428067;428068;428069;428…	25048;45156;104952;202896;219511;284709;316565;406280;428066;479429;540093;577556;647863;649257	554;555	45;98
384	sp|O14920|IKKB_HUMAN	sp|O14920|IKKB_HUMAN	Inhibitor of nuclear factor kappa-B kinase subunit beta OS=Homo sapiens OX=9606 GN=IKBKB PE=1 SV=1	9	9	9	1	9	9	9	12.8	12.8	12.8	86.563	756	756	0	15.001	ALDDILNLK;DLKPENIVLQQGEQR;EGAILTLLSDIASALR;LGTGGFGNVIR;LLLQAIQSFEK;LTHPNVVAAR;NLAFFQLR;RLTHPNVVAAR;SEVDIVVSEDLNGTVK		2600;7767;10134;30028;31594;34329;38049;43352;44641	True;True;True;True;True;True;True;True;True	2819;8448;11035;32791;34472;37470;42237;48010;49405	33291;33292;33293;33294;33295;33296;33297;33298;33299;100501;100502;100503;100504;130292;397233;418717;418718;418719;418720;418721;418722;418723;418724;418725;418726;418727;418728;418729;453209;506055;571809;571810;571811;571812;571813;571814;571815;588162	30993;30994;30995;30996;30997;30998;30999;31000;31001;94009;94010;94011;94012;122059;370744;390855;390856;390857;390858;390859;390860;390861;390862;390863;390864;390865;390866;423102;472110;532823;532824;532825;532826;532827;532828;532829;548046	30998;94009;122059;370744;390855;423102;472110;532827;548046
385	sp|O14925|TIM23_HUMAN;sp|Q5SRD1|TI23B_HUMAN	sp|O14925|TIM23_HUMAN	Mitochondrial import inner membrane translocase subunit Tim23 OS=Homo sapiens OX=9606 GN=TIMM23 PE=1 SV=1	3;1	3;1	3;1	2	3	3	3	16.7	16.7	16.7	21.943	209	209;188	0	12.199	GSLLQQSL;NVQILNMVTR;YLVQDTDEFILPTGANK		19003;39407;59010	True;True;True	20761;43772;43773;65222	243302;524081;524082;524083;524084;524085;524086;524087;524088;524089;524090;524091;524092;524093;524094;524095;524096;524097;524098;524099;524100;524101;524102;524103;524104;524105;524106;524107;524108;783908;783909;783910;783911;783912;783913;783914;783915;783916;783917;783918;783919;783920;783921;783922	226680;488877;488878;488879;488880;488881;488882;488883;488884;488885;488886;488887;488888;488889;488890;488891;488892;488893;488894;488895;488896;488897;488898;488899;488900;488901;488902;488903;730722;730723;730724;730725;730726;730727;730728;730729;730730;730731;730732;730733;730734;730735	226680;488892;730724	556	119
386	sp|O14929|HAT1_HUMAN	sp|O14929|HAT1_HUMAN	Histone acetyltransferase type B catalytic subunit OS=Homo sapiens OX=9606 GN=HAT1 PE=1 SV=2	10	10	10	1	10	10	10	39.6	39.6	39.6	49.54	419	419	0	82.23	CNTNTAIELK;EVDFKPFGTLLHTYSVLSPTGGENFTFQIYK;FPEDLENDIR;LCQDLPCFSR;LLVTDMSDAEQYR;LRDFVLVK;QIIPPGFCTNTNDFLSLLEK;TFFPEYTHQLFGDDETAFGYK;VSQMLILTPFQGQGHGAQLLETVHR;YYTEFPTVLDITAEDPSK		6072;12653;14903;28408;32060;33498;41075;48994;56100;59809	True;True;True;True;True;True;True;True;True;True	6616;13793;16284;31032;34973;36578;45566;54200;62073;66091	78637;78638;78639;78640;78641;78642;78643;78644;78645;78646;160779;160780;190090;190091;190092;190093;375725;375726;375727;375728;375729;375730;375731;375732;375733;375734;424659;424660;424661;424662;424663;424664;424665;424666;424667;424668;424669;424670;442936;442937;442938;442939;442940;442941;442942;442943;442944;442945;442946;442947;442948;543865;543866;543867;543868;543869;543870;543871;543…	73311;73312;73313;73314;73315;73316;73317;150170;150171;177259;177260;177261;177262;350390;350391;350392;350393;350394;350395;350396;350397;350398;350399;396575;396576;396577;396578;396579;396580;396581;396582;396583;396584;396585;413581;413582;413583;413584;413585;413586;413587;413588;413589;413590;413591;413592;413593;507018;507019;507020;507021;507022;507023;507024;507025;507026;507027;507028;…	73317;150170;177261;350394;396580;413581;507022;601198;694519;739985
387	sp|O14933|UB2L6_HUMAN	sp|O14933|UB2L6_HUMAN	Ubiquitin/ISG15-conjugating enzyme E2 L6 OS=Homo sapiens OX=9606 GN=UBE2L6 PE=1 SV=4	3	3	3	1	3	3	3	21.6	21.6	21.6	17.769	153	153	0.00024994	5.9819	KPPPYLR;NAEEFTLR;TCQVLEALNVLVNRPNIR		27126;37052;48563	True;True;True	29641;41154;53727	356890;356891;356892;356893;356894;356895;493519;493520;493521;493522;493523;493524;493525;493526;639770;639771;639772;639773	332887;332888;332889;332890;332891;460552;460553;460554;460555;460556;460557;460558;460559;460560;596145;596146;596147;596148	332890;460558;596146
388	sp|O14936|CSKP_HUMAN	sp|O14936|CSKP_HUMAN	Peripheral plasma membrane protein CASK OS=Homo sapiens OX=9606 GN=CASK PE=1 SV=3	17	17	17	1	17	17	17	21.6	21.6	21.6	105.12	926	926	0	29.505	DLDFLHSVFQDQHLHTLLDLYDKINTK;DVKPHCVLLASK;FTSSPGLSTEDLKR;GAVLAAVSSHK;GPFSVVR;HNAVFDQLDLVTYEEVVK;IHEQGLIAILDVEPQALK;IHLPETVEQLR;IHLPETVEQLRK;ITVYEALNHPWLK;KIHEQGLIAILDVEPQALK;KTLVLLGAHGVGR;LFEGIIK;NPPSDAVQR;TAEFAPFVVFIAAPTITPGLNEDESLQR;TLVLLGAHGVGR;VGDIIQIISK		7604;8856;15514;16200;18428;20834;22843;22877;22878;25301;26520;27383;29259;38717;48277;50286;53308	True;True;True;True;True;True;True;True;True;True;True;True;True;True;True;True;True	8276;9648;16953;17708;20138;22757;24925;24959;24960;27661;28973;29917;31941;42999;53405;55608;58954	98424;114603;114604;114605;114606;114607;114608;197805;197806;197807;197808;207176;236211;236212;236213;236214;236215;236216;236217;269031;269032;269033;269034;297881;297882;298386;298387;298388;298389;298390;331865;331866;331867;331868;331869;348416;348417;348418;348419;348420;360789;386121;386122;386123;514953;514954;635753;635754;663446;663447;663448;663449;663450;663451;663452;663453;663454;6…	92032;107330;107331;107332;107333;107334;184365;184366;184367;184368;193087;220118;220119;220120;220121;220122;250820;250821;278008;278489;278490;278491;309806;309807;309808;309809;325245;325246;325247;325248;336480;360175;360176;360177;480443;592431;618340;618341;618342;618343;618344;618345;618346;618347;618348;618349;656950;656951;656952;656953;656954;656955;656956;656957;656958;656959;656960;6…	92032;107333;184366;193087;220118;250821;278008;278489;278490;309806;325247;336480;360177;480443;592431;618346;656950
389	sp|O14949|QCR8_HUMAN	sp|O14949|QCR8_HUMAN	Cytochrome b-c1 complex subunit 8 OS=Homo sapiens OX=9606 GN=UQCRQ PE=1 SV=4	9	9	9	1	9	9	9	69.5	69.5	69.5	9.9062	82	82	0	40.725	AYPHVFTK;GIPNVLR;GIPNVLRR;GREFGNLTR;HVISYSLSPFEQR;IRESFFR;KNPAAYENDK;MRHVISYSLSPFEQR;NPAAYENDK		5522;17465;17466;18812;21346;24682;27000;36672;38613	True;True;True;True;True;True;True;True;True	6018;19076;19077;20560;23316;26967;29500;40562;42886	71620;71621;71622;71623;71624;71625;71626;71627;71628;71629;71630;71631;71632;71633;71634;71635;223706;223707;223708;223709;223710;223711;223712;223713;223714;223715;223716;223717;223718;223719;241008;241009;241010;241011;241012;241013;241014;241015;241016;241017;241018;241019;241020;241021;241022;241023;241024;241025;241026;241027;241028;278124;278125;278126;278127;278128;278129;278130;278131;27…	66755;66756;66757;66758;66759;66760;66761;66762;66763;66764;66765;66766;66767;66768;208454;208455;208456;208457;224571;224572;224573;224574;224575;224576;224577;224578;224579;224580;224581;224582;224583;224584;224585;224586;224587;224588;224589;259718;259719;259720;259721;259722;259723;259724;259725;259726;259727;259728;259729;259730;259731;259732;259733;259734;259735;259736;259737;259738;259739;…	66755;208454;208455;224576;259730;302081;331151;454815;479249	557	11
390	sp|P19105|ML12A_HUMAN;sp|O14950|ML12B_HUMAN	sp|P19105|ML12A_HUMAN;sp|O14950|ML12B_HUMAN	Myosin regulatory light chain 12A OS=Homo sapiens OX=9606 GN=MYL12A PE=1 SV=2; Myosin regulatory light chain 12B OS=Homo sapiens OX=9606 GN=MYL12B PE=1 SV=2	9;9	4;4	4;4	2	9	4	4	51.5	18.1	18.1	19.794	171	171;172	0	74.459	ATSNVFAMFDQSQIQEFK;DGFIDKEDLHDMLASLGK;EAFNMIDQNR;ELLTTMGDR;ELLTTMGDRFTDEEVDELYR;FTDEEVDELYR;GNFNYIEFTR;KGNFNYIEFTR;LNGTDPEDVIR		4779;6976;9247;11295;11296;15434;18268;26362;32326	False;False;False;False;True;True;True;True;False	5209;5210;7598;7599;10074;10075;12275;12276;12277;12278;16868;19962;28796;35316	62027;62028;62029;62030;62031;62032;62033;62034;62035;62036;62037;62038;62039;62040;62041;62042;62043;90208;90209;90210;90211;90212;90213;90214;90215;90216;90217;90218;90219;90220;90221;90222;90223;90224;90225;90226;90227;90228;90229;90230;90231;90232;90233;90234;90235;90236;90237;90238;90239;90240;90241;90242;90243;90244;90245;90246;90247;90248;90249;90250;90251;90252;90253;90254;90255;90256;902…	57778;57779;57780;57781;57782;57783;57784;57785;57786;57787;57788;57789;57790;57791;57792;57793;57794;84410;84411;84412;84413;84414;84415;84416;84417;84418;84419;84420;84421;84422;84423;84424;84425;84426;84427;84428;84429;84430;84431;84432;84433;84434;84435;84436;84437;84438;84439;84440;84441;84442;84443;84444;84445;84446;84447;84448;84449;84450;84451;84452;84453;84454;84455;84456;84457;84458;844…	57790;84457;111838;135230;135261;183443;217942;322986;400255	558;559;560;561	24;39;56;129
392	sp|O14964|HGS_HUMAN	sp|O14964|HGS_HUMAN	Hepatocyte growth factor-regulated tyrosine kinase substrate OS=Homo sapiens OX=9606 GN=HGS PE=1 SV=1	22	22	22	1	22	22	22	24.6	24.6	24.6	86.191	777	777	0	152.82	ACGQIFCGK;ALQNAVTTFVNR;APDWVDAEECHR;ESDAMFAAER;GALSALREEHR;ILYLIQAWAHAFR;ILYLIQAWAHAFRNEPK;KQEYLEVQR;LYYEGLQDK;NCGQTVHDEVANK;NKILYLIQAWAHAFR;NPHVALYALEVMESVVK;QEYLEVQR;QTMEELKDLLK;QVEVNVR;RLYYEGLQDK;STYTSYPK;VCEPCYEQLNR;VEGHVFPEFK;VNDKNPHVALYALEVMESVVK;VQFGVMTR;VVQDTYQIMK		686;3116;3641;12175;16076;23960;23961;27201;35485;37216;38013;38679;40669;42349;42449;43378;47700;52462;52859;55138;55659;56860	True;True;True;True;True;True;True;True;True;True;True;True;True;True;True;True;True;True;True;True;True;True	732;3374;3980;13269;13270;17573;26136;26137;29719;38719;41337;42201;42958;45124;46948;47053;48037;52768;58039;58464;61010;61590;62898;62899	8090;8091;8092;8093;8094;8095;8096;8097;8098;40108;40109;40110;40111;40112;40113;40114;40115;40116;40117;40118;40119;40120;40121;40122;40123;40124;40125;40126;40127;40128;40129;40130;40131;46813;46814;46815;46816;46817;46818;46819;154851;154852;154853;154854;154855;205566;205567;205568;205569;205570;205571;205572;205573;205574;205575;205576;205577;205578;205579;205580;205581;313981;313982;313983;…	7551;7552;7553;7554;7555;7556;37299;37300;37301;37302;37303;37304;37305;37306;37307;37308;37309;37310;37311;37312;37313;37314;37315;37316;37317;37318;37319;37320;37321;43507;43508;43509;43510;43511;43512;43513;144635;144636;144637;144638;191610;191611;191612;191613;191614;191615;191616;191617;191618;191619;191620;191621;191622;191623;191624;191625;293024;293025;293026;293027;293028;293029;293030;…	7553;37309;43508;144635;191621;293040;293053;333770;437518;462770;471669;479998;502329;520567;522003;533136;585276;647054;651277;681878;689053;704648	562;563	135;151
393	sp|O14965|AURKA_HUMAN;sp|Q9UQB9|AURKC_HUMAN	sp|O14965|AURKA_HUMAN	Aurora kinase A OS=Homo sapiens OX=9606 GN=AURKA PE=1 SV=3	5;1	5;1	4;0	2	5	5	4	18.1	18.1	16.1	45.823	403	403;309	0.00025853	6.8099	DIKPENLLLGSAGELK;FGNVYLAR;QWALEDFEIGRPLGK;SKQPLPSAPENNPEEELASK;VEFTFPDFVTEGAR		7302;13916;42615;45622;52846	True;True;True;True;True	7954;15175;47231;50480;58451	94713;177260;177261;177262;562351;601302;698437;698438;698439	88591;165399;165400;165401;524022;560269;651136;651137	88591;165400;524022;560269;651137
394	sp|O14966|RAB7L_HUMAN	sp|O14966|RAB7L_HUMAN	Ras-related protein Rab-7L1 OS=Homo sapiens OX=9606 GN=RAB29 PE=1 SV=1	4	3	3	1	4	3	3	21.2	15.8	15.8	23.155	203	203	0.00066979	3.6806	CDLSPWAVSR;LQLWDIAGQER;VLQWSDYEIVR;VLVVGDAAVGK		5673;33266;54795;54985	True;False;True;True	6184;36323;60589;60796	73967;439979;439980;439981;439982;439983;439984;439985;439986;439987;439988;439989;439990;439991;439992;439993;439994;439995;439996;439997;439998;439999;440000;726109;726110;726111;726112;726113;726114;726115;728831;728832;728833;728834;728835;728836;728837;728838;728839	68990;410864;410865;410866;410867;410868;410869;410870;410871;410872;410873;410874;410875;410876;410877;410878;410879;410880;410881;410882;410883;410884;410885;410886;676984;676985;676986;676987;676988;679528;679529;679530;679531;679532;679533;679534;679535	68990;410873;676985;679534
395	sp|O14972|VP26C_HUMAN	sp|O14972|VP26C_HUMAN	Vacuolar protein sorting-associated protein 26C OS=Homo sapiens OX=9606 GN=VPS26C PE=1 SV=1	6	6	6	1	6	6	6	25.3	25.3	25.3	33.01	297	297	0	11.195	FTPSPVDFTITPETLQNVK;GLSVPIYMVFPR;SVELQLVR;TCEFIVHSAPQK;TEIPFEFPLHLK;VETCGCAEGYAR		15493;18080;47761;48525;48819;52983	True;True;True;True;True;True	16931;19727;19728;52834;53684;54009;58594	197609;197610;197611;197612;197613;197614;197615;197616;197617;197618;197619;197620;197621;230952;230953;230954;230955;230956;230957;230958;230959;230960;628783;628784;628785;628786;628787;628788;628789;628790;628791;628792;628793;639389;639390;639391;639392;642926;642927;642928;642929;642930;642931;642932;642933;642934;642935;642936;642937;642938;642939;642940;642941;642942;642943;642944;642945;…	184192;184193;184194;184195;184196;184197;184198;184199;184200;184201;184202;215109;215110;215111;215112;215113;585867;585868;585869;585870;585871;585872;585873;585874;585875;585876;595814;595815;595816;595817;599083;599084;599085;599086;599087;599088;599089;599090;599091;599092;599093;599094;599095;599096;599097;599098;599099;599100;599101;599102;599103;599104;599105;599106;599107;599108;599109;…	184195;215111;585873;595816;599096;652782
396	sp|O14974|MYPT1_HUMAN;sp|O60237|MYPT2_HUMAN	sp|O14974|MYPT1_HUMAN	Protein phosphatase 1 regulatory subunit 12A OS=Homo sapiens OX=9606 GN=PPP1R12A PE=1 SV=1	36;1	36;1	36;1	2	36	36	36	37.8	37.8	37.8	115.28	1030	1030;982	0	320.3	AQLHDTNMELTDLK;AQLHDTNMELTDLKLQLEK;DYDGWTPLHAAAHWGK;ETLIIEPEK;ETQTDSISR;GADINYANVDGLTALHQACIDDNVDMVK;ILVDNLCDMEMVNK;ISEMEEELK;ITTGSSSAGTQSSTSNR;KDESPATWR;LASTSDIEEKENR;LAYVAPTIPR;LKDENGALIR;LSSSLDNK;LSSSLDNKEK;LYEQILAENEK;LYEQILAENEKLK;NKETLIIEPEK;NSSVNEGSTYHK;QGVDIEAAR;QWLNSGHINDVR;RLASTSDIEEK;RSTQGVTLTDLQEAEK;SGGTALHVAAAK;SGSYSYLEER;SLLEMEKR;SLLSSTSTTTK;SPLIESTANMDNNQSQK;STQGVTLTDLQEAEK;SYLTPVR…		4010;4011;9021;12485;12532;15950;23919;24786;25274;25978;28220;28325;30721;34084;34085;35289;35290;38004;39040;40907;42629;43170;43652;44978;45110;45983;46039;46669;47621;48159;49313;51883;53502;57457;57458;58191	True;True;True;True;True;True;True;True;True;True;True;True;True;True;True;True;True;True;True;True;True;True;True;True;True;True;True;True;True;True;True;True;True;True;True;True	4377;4378;4379;9829;13609;13661;17435;26092;26093;26094;27076;27629;28390;30833;30944;33547;37203;37204;38509;38510;42190;43358;45386;47246;47824;48332;49772;49916;50863;50864;50922;51644;52682;53272;54543;57394;59168;63535;63536;64333	52617;52618;52619;52620;52621;52622;52623;52624;52625;116455;158363;158364;158365;158366;159121;159122;159123;159124;203630;313530;313531;313532;313533;313534;313535;313536;313537;313538;313539;313540;313541;313542;313543;324704;324705;324706;324707;324708;331436;331437;331438;331439;331440;331441;331442;331443;331444;331445;331446;331447;331448;331449;331450;331451;331452;341037;341038;373351;37…	49160;49161;49162;49163;49164;49165;49166;49167;109041;147897;147898;147899;148595;148596;148597;189778;292614;292615;292616;292617;292618;292619;292620;292621;292622;292623;292624;303143;303144;303145;303146;309399;309400;309401;309402;309403;309404;309405;309406;309407;309408;309409;309410;309411;309412;309413;309414;309415;318385;348193;348194;348195;348196;348197;348198;348199;349653;349654;3…	49160;49166;109041;147898;148595;189778;292615;303144;309409;318385;348199;349669;379942;420536;420540;435422;435433;471542;484067;504999;524176;531428;536932;552047;553250;565299;565814;573268;584302;590829;605106;638348;659742;711671;711673;720251	564;565;566;567;568;569	88;258;260;308;955;982
397	sp|O14976|GAK_HUMAN	sp|O14976|GAK_HUMAN	Cyclin-G-associated kinase OS=Homo sapiens OX=9606 GN=GAK PE=1 SV=2	25	25	25	1	25	25	25	21.2	21.2	21.2	143.19	1311	1311	0	106.58	ACTQPRPNYASNFSVIGAR;AIIQEVCFMK;ALLSTLHTVLWDGESR;ALVEEEITR;AMLQVNPEER;APHLHTLYNICR;AVVMTPVPLFSK;DLKVENLLLSNQGTIK;EEQQDILSK;GDLDISYITSR;GPLSCDTVLK;GQLVEFLK;HPGHYAVYNLSPR;IAVMSFPAEGVESALK;LFTNLKDTSSK;LLDWIEGK;LLSNEEEKNR;LSIAEVVHQLQEIAAAR;MFQIQFHTGFVPR;RAVLAVHPDK;TPEIIDLYSNFPIGEK;VASTSQEYDK;VASTSQEYDKMR;VENLLLSNQGTIK;VIQSVANYAK		724;2220;2985;3251;3399;3705;5340;7784;9909;16359;18501;18719;20927;21785;29521;31141;31909;33861;35911;42800;50560;52354;52355;52927;53979	True;True;True;True;True;True;True;True;True;True;True;True;True;True;True;True;True;True;True;True;True;True;True;True;True	772;2403;3229;3522;3705;4049;5824;5825;8465;10797;17884;20217;20457;22859;23786;23787;32231;33992;34810;36965;39374;47431;55937;57924;57925;58537;59702	8575;28120;28121;28122;28123;28124;38532;38533;38534;38535;42273;42274;42275;42276;42277;42278;42279;44181;47657;69374;69375;69376;69377;69378;69379;69380;69381;69382;69383;69384;69385;69386;69387;69388;69389;69390;69391;69392;69393;69394;69395;100674;100675;100676;100677;100678;100679;100680;100681;100682;127903;209059;209060;237233;237234;237235;237236;237237;239965;270354;270355;270356;270357;…	7983;26221;26222;26223;26224;26225;35845;35846;35847;35848;39380;39381;39382;39383;39384;41103;44297;64645;64646;64647;64648;64649;64650;64651;64652;64653;64654;64655;64656;64657;64658;64659;64660;64661;64662;64663;64664;94171;94172;94173;94174;94175;94176;94177;94178;119858;194807;194808;221085;221086;221087;223655;252048;252049;252050;252051;252052;252053;252054;252055;252056;265561;265562;2655…	7983;26221;35846;39380;41103;44297;64654;94175;119858;194808;221086;223655;252050;265567;363470;385434;394891;417631;443862;526035;621760;645221;645222;652095;666861	570;571;572	420;582;618
398	sp|O14979|HNRDL_HUMAN	sp|O14979|HNRDL_HUMAN	Heterogeneous nuclear ribonucleoprotein D-like OS=Homo sapiens OX=9606 GN=HNRNPDL PE=1 SV=3	11	10	10	1	11	10	10	30	28.1	28.1	46.437	420	420	0	76.748	DAASVDKVLELK;DLTEYLSR;FGEVVDCTIKTDPVTGR;GFCFITYTDEEPVKK;GFGFVLFK;MFIGGLSWDTSK;MFIGGLSWDTSKK;QLAPLLPSLAPSSAR;VFVGGLSPDTSEEQIK;VFVGGLSPDTSEEQIKEYFGAFGEIENIELPMDTK;VLELKEHK		6389;7950;13825;16694;16760;35889;35890;41273;53261;53262;54373	True;True;True;True;False;True;True;True;True;True;True	6960;8652;15076;18239;18310;39341;39342;39343;39344;45781;58901;58902;60129	82286;82287;82288;82289;82290;82291;82292;82293;82294;82295;82296;82297;82298;82299;82300;82301;82302;82303;82304;82305;82306;82307;82308;103094;103095;103096;103097;103098;103099;103100;103101;103102;103103;103104;175981;175982;175983;213112;213113;213114;213115;213116;213117;213118;213119;213120;213121;213122;213123;213124;213125;213126;213127;213128;213129;213130;213131;213132;213133;213134;21…	76745;76746;76747;76748;76749;76750;76751;76752;76753;76754;76755;76756;76757;76758;76759;76760;76761;76762;76763;76764;76765;96463;96464;96465;96466;96467;96468;96469;96470;96471;164231;164232;164233;198535;198536;198537;198538;198539;198540;198541;198542;198543;198544;198545;198546;198547;198548;198549;198550;198551;198552;198553;198554;198555;198556;198557;198558;199355;199356;199357;199358;19…	76758;96463;164232;198553;199372;443358;443396;509348;656515;656524;672466	573;574	150;266
399	sp|O14980|XPO1_HUMAN	sp|O14980|XPO1_HUMAN	Exportin-1 OS=Homo sapiens OX=9606 GN=XPO1 PE=1 SV=1	55	55	55	1	55	55	55	60.7	60.7	60.7	123.38	1071	1071	0	323.31	AIIASNIMYIVGQYPR;AVGHPFVIQLGR;DFEEYPEHR;DLLGLCEQK;DTDSINLYK;EFAGEDTSDLFLEER;EFMKDTDSINLYK;EHDQLIEK;EHDQLIEKR;EHLRDFLVQIK;EHPDAWTR;EPEVLSTMAIIVNK;ESPFSTSASPLLSGSQHFDVPPR;ESPFSTSASPLLSGSQHFDVPPRR;ETLVYLTHLDYVDTER;FLNVPMFR;FLNWIPLGYIFETK;FLVTVIK;FLVTVIKDLLGLCEQK;HWPTFISDIVGASR;ICLEYWNHLAAELYR;ISTSLNPGNPVNNQIFLQEYVANLLK;IYLDMLNVYK;KYVVGLIIK;LDINLLDNVVNCLYHGEGAQQR;LFEFMHETHDGVQDMACDTFIK;LFVTGLFSLNQDIP…		2204;5031;6801;7803;8650;9948;10038;10434;10435;10482;10491;11816;12290;12291;12497;14562;14564;14705;14706;21446;21858;25008;25732;27674;28578;29258;29558;30222;30613;30626;31872;32402;34839;35542;35580;38310;39242;39389;41411;41459;41705;41742;41757;43613;43915;46410;50422;51032;51172;51173;52718;57125;59052;59698;59774	True;True;True;True;True;True;True;True;True;True;True;True;True;True;True;True;True;True;True;True;True;True;True;True;True;True;True;True;True;True;True;True;True;True;True;True;True;True;True;True;True;True;True;True;True;True;True;True;True;True;True;True;True;True;True	2385;2386;5480;7402;8484;9427;10838;10933;11364;11365;11418;11428;12882;12883;13398;13399;13622;15881;15882;15884;16046;16047;23423;23869;27340;28120;28121;30225;31213;31940;32272;33004;33427;33442;34769;35398;35399;38021;38788;38789;38859;38860;42524;42525;43586;43752;45926;45976;46239;46240;46292;46293;46313;48293;48617;51362;51363;55789;56453;56454;56613;56614;58313;63184;63185;65278;65279;659…	27902;27903;27904;27905;27906;27907;27908;27909;27910;27911;27912;27913;27914;27915;27916;27917;27918;27919;27920;27921;27922;27923;27924;27925;27926;27927;27928;27929;27930;27931;27932;65719;65720;65721;65722;65723;65724;65725;65726;65727;65728;65729;65730;65731;65732;65733;65734;65735;65736;65737;65738;65739;65740;65741;65742;65743;65744;65745;65746;65747;65748;65749;65750;65751;65752;65753;878…	26008;26009;26010;26011;26012;26013;26014;26015;26016;26017;26018;26019;26020;26021;26022;26023;26024;26025;26026;26027;26028;26029;26030;26031;26032;26033;26034;26035;26036;26037;61283;61284;61285;61286;61287;61288;61289;61290;61291;61292;61293;61294;61295;61296;61297;61298;61299;61300;61301;61302;61303;61304;61305;61306;61307;61308;61309;61310;61311;61312;61313;61314;61315;61316;61317;82257;822…	26032;61302;82258;94468;104910;120168;120980;125465;125470;126023;126201;140904;145747;145757;147980;173272;173300;174861;174878;261149;266426;306110;315122;341411;353152;360172;364025;373413;378360;378694;394523;401130;429532;438004;438928;474830;486701;488568;510612;511106;513599;514036;514203;536493;539987;570143;620127;626749;628694;628706;649859;707630;731349;738883;739612	575;576;577;578;579;580;581;582;583;584;585;586;587	45;132;168;259;297;412;424;445;508;545;658;717;771
400	sp|O15013|ARHGA_HUMAN	sp|O15013|ARHGA_HUMAN	Rho guanine nucleotide exchange factor 10 OS=Homo sapiens OX=9606 GN=ARHGEF10 PE=1 SV=4	9	9	9	1	9	9	9	7.5	7.5	7.5	151.61	1369	1369	0	10.526	FIVLATALHEK;GMVSYHAHNSPVK;ILCMLYVPVEEK;IQLQLPGKQDK;LFHTETLK;LGVLPVR;SGRPTFFTAVFNTFTPAIK;VIECFNVESR;YILGSVVDSEK		14243;18232;23458;24544;29331;30063;45078;53768;58645	True;True;True;True;True;True;True;True;True	15529;19923;25586;26816;32018;32830;49877;59459;64830	181664;233393;307201;321704;386957;397682;397683;397684;397685;397686;397687;397688;397689;397690;397691;397692;397693;593501;593502;593503;593504;711771;779026	169480;169481;217473;286754;300361;360923;371168;371169;371170;371171;371172;371173;371174;371175;371176;371177;553044;553045;553046;553047;553048;663608;726204	169481;217473;286754;300361;360923;371175;553044;663608;726204	588	1202
401	sp|O15020|SPTN2_HUMAN	sp|O15020|SPTN2_HUMAN	Spectrin beta chain, non-erythrocytic 2 OS=Homo sapiens OX=9606 GN=SPTBN2 PE=1 SV=3	10	2	2	1	10	2	2	5	1.1	1.1	271.32	2390	2390	1	-2	DALLLWCQMK;DLTGALR;ETWLSENQR;EVVAASHELGQDYEHVTMLR;FQIQDISVETEDNKEK;GNLEVLLFTIQSK;IHCLENVDK;LISDINKAWER;VHLENMGSHDIVDGNHR;WVNSHLAR	+	6501;7951;12581;12937;15039;18296;22829;30602;53646;57771	False;True;False;True;False;False;False;False;False;False	7077;7078;8653;13713;14112;16427;19993;24909;33416;59322;63874	84191;84192;84193;84194;103105;159836;159837;159838;159839;159840;159841;164238;191787;191788;191789;191790;191791;191792;191793;191794;191795;191796;191797;191798;191799;191800;191801;191802;234231;297528;297529;297530;297531;297532;297533;297534;297535;405298;709729;709730;767103;767104;767105;767106;767107;767108;767109;767110;767111;767112;767113;767114;767115;767116	78761;78762;78763;78764;96472;149256;149257;149258;149259;149260;149261;153300;178850;178851;178852;178853;178854;178855;178856;178857;178858;178859;178860;178861;178862;178863;218269;277669;277670;277671;277672;277673;277674;277675;378278;661678;661679;715106;715107;715108;715109;715110;715111;715112;715113;715114;715115;715116	78764;96472;149261;153300;178850;218269;277672;378278;661678;715110	589	136
402	sp|O15027|SC16A_HUMAN	sp|O15027|SC16A_HUMAN	Protein transport protein Sec16A OS=Homo sapiens OX=9606 GN=SEC16A PE=1 SV=4	16	16	16	1	16	16	16	9.2	9.2	9.2	251.89	2357	2357	0	29.314	AHASPFSGALTPSAPPGPEMNR;DAQGQPGLER;DDTHKVDVINFAQNK;FANLTPSR;FATNEAIQR;GLANPEPAPEPK;HLLQEAR;IVNHWASPELR;LLPSAPQTLPDGPLASPAR;LVLIGSNHSLPFLK;NEHRPASALVNPLAR;QALQSTPLGSSSK;TLENPVNVYNPSHSDSLASQQSVASHPR;TMATMGDTLASR;YGPLPGPAVPR;YVDVLNPSGTQR		1958;6538;6705;13260;13316;17684;20671;25500;31736;34852;37398;40274;49916;50334;58446;59624	True;True;True;True;True;True;True;True;True;True;True;True;True;True;True;True	2117;7119;7301;14461;14520;19309;22567;27876;34626;38035;41533;44695;55203;55661;64613;65896	24418;84695;87077;87078;87079;87080;168891;169702;169703;169704;169705;169706;169707;169708;169709;169710;169711;169712;226333;226334;226335;226336;226337;266383;266384;334307;420429;420430;420431;420432;420433;420434;420435;420436;420437;420438;420439;420440;420441;420442;420443;460357;460358;460359;460360;460361;460362;460363;460364;460365;460366;460367;460368;460369;460370;460371;460372;460373…	22781;79236;81543;157669;158428;158429;158430;158431;158432;158433;158434;158435;158436;158437;158438;210853;210854;248233;312078;392442;392443;392444;392445;392446;392447;392448;392449;392450;392451;392452;392453;392454;429724;429725;429726;429727;429728;429729;429730;429731;429732;429733;429734;429735;429736;429737;465054;465055;465056;465057;497844;497845;497846;497847;497848;614143;614144;614…	22781;79236;81543;157669;158433;210854;248233;312078;392451;429724;465055;497848;614145;618765;723438;738104	590;591;592	138;1723;1726
403	sp|O15031|PLXB2_HUMAN	sp|O15031|PLXB2_HUMAN	Plexin-B2 OS=Homo sapiens OX=9606 GN=PLXNB2 PE=1 SV=3	22	22	22	1	22	22	22	16.8	16.8	16.8	205.12	1838	1838	0	66.188	AEEASHWLWSR;AHTDSLNTLVALHQLYQYTQK;DIFYKPFHGDIQCGGHAPGSSK;EAFEAYTDHATYK;EASPNPEDGIVR;FGAQLQCVTGPQATR;FMEPVTMQESGTFAFR;GNGPHDNGIIVSTR;GSSLHVGSDLLK;GTLQQFVDNFFQSVLAPGHAVPPAVK;IIDQVYR;IQPETGPLGGGIR;LFYEDGSGEK;LQLEQQVATGPALDNKK;LQQIAAALENK;LVECGSLFK;RPVVEQALYQFSNLLNSK;SFLINFIHTLENQR;SPPNVQFTFQQPK;SSGGPGAGLCLFPLDK;VLYAVFSR;VNTLMHYNVR		1035;2038;7264;9233;9476;13790;14737;18274;19074;19252;23002;24572;29567;33230;33344;34677;43577;44776;46719;47181;54995;55291	True;True;True;True;True;True;True;True;True;True;True;True;True;True;True;True;True;True;True;True;True;True	1117;2205;7915;10060;10325;15035;16090;19969;20837;21025;25095;26846;32281;36284;36412;37851;48255;49551;51698;52203;60806;61185	12058;12059;12060;12061;12062;12063;12064;12065;12066;12067;12068;25709;25710;25711;25712;94320;94321;94322;94323;94324;94325;119273;119274;119275;119276;119277;119278;119279;122449;122450;122451;122452;122453;175532;175533;175534;175535;187932;233964;244173;244174;244175;244176;244177;244178;244179;244180;244181;244182;246184;246185;246186;246187;246188;246189;300095;300096;300097;300098;322063;…	11163;11164;11165;11166;11167;11168;11169;11170;11171;11172;11173;11174;23979;23980;88235;88236;88237;88238;111702;111703;111704;111705;114700;114701;114702;114703;114704;163834;163835;163836;163837;175231;218014;227469;227470;227471;227472;227473;227474;227475;227476;227477;227478;229276;229277;229278;229279;229280;229281;229282;280066;300685;300686;300687;300688;300689;300690;300691;300692;3006…	11163;23979;88237;111702;114700;163836;175231;218014;227476;229277;280066;300687;364229;410495;411829;427535;536078;549284;573749;578951;679649;683977	593;594	710;715
404	sp|O15040|TCPR2_HUMAN	sp|O15040|TCPR2_HUMAN	Tectonin beta-propeller repeat-containing protein 2 OS=Homo sapiens OX=9606 GN=TECPR2 PE=1 SV=4	3	3	3	1	3	3	3	2.4	2.4	2.4	153.85	1411	1411	0.00067054	3.6887	VAVFQLVSSLPGR;VLLVSTLQR;WAFVLASAAPTK		52391;54655;57245	True;True;True	57967;60435;63310	692881;692882;692883;692884;692885;692886;692887;692888;692889;724473;724474;760676	646022;646023;646024;646025;646026;646027;646028;646029;675471;675472;709047	646022;675472;709047
405	sp|O15042|SR140_HUMAN	sp|O15042|SR140_HUMAN	U2 snRNP-associated SURP motif-containing protein OS=Homo sapiens OX=9606 GN=U2SURP PE=1 SV=2	12	12	12	1	12	12	12	12.4	12.4	12.4	118.29	1029	1029	0	29.164	DKLEEILR;FGPLASVK;FLFENQTPAHVYYR;LCQIFSDLNATYR;LREIELK;LYSILQGDSPTK;NLLALIHR;NPPNQSSNERPPSLLVIETK;SNLELFKEELK;TIQGHLQSENFK;TLSQAIVK;VVIPTER		7480;13922;14428;28412;33532;35439;38237;38712;46463;49659;50225;56727	True;True;True;True;True;True;True;True;True;True;True;True	8141;15181;15735;31036;36612;38671;42442;42994;51422;54924;55544;62755	96789;177285;184128;184129;184130;184131;184132;184133;184134;375762;443366;443367;443368;443369;443370;443371;443372;443373;443374;443375;443376;443377;443378;443379;468069;468070;468071;468072;468073;468074;468075;468076;468077;508230;508231;508232;508233;508234;508235;514929;514930;514931;612484;612485;612486;612487;612488;612489;655357;655358;655359;655360;655361;662725;754066	90496;165420;171758;171759;171760;171761;171762;171763;350426;413991;413992;413993;413994;413995;413996;413997;413998;413999;414000;414001;414002;414003;414004;436946;436947;436948;436949;436950;436951;436952;436953;474098;474099;474100;474101;474102;474103;480423;480424;480425;570739;570740;570741;570742;570743;570744;610806;610807;610808;610809;617661;702972	90496;165420;171760;350426;414002;436948;474098;480424;570740;610808;617661;702972
406	sp|O15056|SYNJ2_HUMAN	sp|O15056|SYNJ2_HUMAN	Synaptojanin-2 OS=Homo sapiens OX=9606 GN=SYNJ2 PE=1 SV=3	2	2	2	1	2	2	2	1.5	1.5	1.5	165.54	1496	1496	0.0079793	2.2726	LLEFDQLQLQK;TALQVFDPLAK		31201;48389	True;True	34054;53532	413697;637305	386107;593836	386107;593836
407	sp|O15067|PUR4_HUMAN	sp|O15067|PUR4_HUMAN	Phosphoribosylformylglycinamidine synthase OS=Homo sapiens OX=9606 GN=PFAS PE=1 SV=4	30	30	30	1	30	30	30	32	32	32	144.73	1338	1338	0	172.1	AFSITQGLLK;ALWEETSFQLDR;ATGLGPVDR;CPACFVGTITGDRR;DAGLHCLELGHTGEAGPHAMVR;DFLTHVSAR;EAPEPGMEVVK;ELSDPAGAIIYTSR;ESWLLPGSNDLLLEVGPR;FCDNSSAIQGK;FGEPVLAGFAR;FQQQQGLR;GHLLYVALSPGQHR;GNPICSLHDQGAGGNGNVLK;GWAAAVTFHPR;HLAVMPHPER;IRDVQCTGR;IVLVDDRECPVR;KEFFLQR;KPPMLQPLALPPGLSVHQALER;LGGTALAQCFSQLGEHPPDLDLPENLVR;LNFSTPTSTNIVSVCR;LSFAHPPSAEVEAIALATLHDR;LVHSLFESIMSTQESSNPNNVLK;MTEQHFPHPIQSFSPESMPEPLNGPINILGEG…		1516;3295;4668;6082;6459;6860;9423;11441;12371;13345;13822;15087;17235;18313;19625;20565;24664;25490;26084;27123;29768;32319;33790;34791;36786;38741;45867;46705;53479;58988	True;True;True;True;True;True;True;True;True;True;True;True;True;True;True;True;True;True;True;True;True;True;True;True;True;True;True;True;True;True	1637;3571;5097;6628;7031;7468;10268;12443;13487;14550;15073;16485;18824;20010;21440;22448;22449;26949;27865;28503;29638;32499;35308;36889;37972;40740;43025;50740;51684;59143;59144;65197	17845;17846;17847;17848;17849;17850;17851;17852;17853;17854;17855;17856;17857;17858;17859;17860;17861;17862;17863;17864;17865;42820;42821;42822;60972;60973;60974;78749;78750;83535;83536;83537;88822;88823;88824;88825;88826;88827;88828;121667;121668;121669;121670;121671;121672;121673;146305;146306;146307;146308;146309;146310;146311;146312;146313;146314;146315;146316;146317;146318;157137;170086;1700…	16572;16573;16574;16575;16576;16577;16578;16579;16580;16581;16582;16583;16584;16585;16586;16587;16588;16589;16590;16591;39873;39874;56835;56836;56837;73409;73410;78143;78144;78145;83150;83151;83152;83153;83154;83155;83156;113971;113972;113973;113974;113975;136752;136753;136754;136755;136756;136757;136758;136759;136760;136761;136762;136763;136764;136765;146749;158797;158798;158799;158800;158801;15…	16590;39874;56835;73409;78145;83150;113975;136758;146749;158803;164219;179305;205020;218389;234543;246855;301878;312017;319681;332872;367711;400174;416674;428825;456291;480741;562904;573633;659574;730477	595;596;597;598;599	149;166;447;1218;1295
408	sp|O15084|ANR28_HUMAN;sp|Q8N8A2|ANR44_HUMAN	sp|O15084|ANR28_HUMAN	Serine/threonine-protein phosphatase 6 regulatory ankyrin repeat subunit A OS=Homo sapiens OX=9606 GN=ANKRD28 PE=1 SV=5	9;1	9;1	9;1	2	9	9	9	11.1	11.1	11.1	112.96	1053	1053;993	0	24.711	AVASCSEEAVQVLLK;GHETSALLILEK;LLVSHGAEVTCK;NGLTMVVQELLGK;NLINATNAALQTPLHVAAR;TPLDLAAFK;TVSFEALPIMR;WLTPLHR;YGHELLINTLITSGADTAK		4886;17198;32055;37652;38220;50634;51741;57566;58391	True;True;True;True;True;True;True;True;True	5322;18783;34967;41802;41803;42425;56018;57241;63654;64547	63466;219646;219647;219648;219649;219650;219651;424640;424641;424642;501174;501175;501176;501177;501178;508117;508118;508119;508120;508121;508122;508123;508124;508125;508126;668040;668041;668042;668043;668044;668045;668046;668047;668048;668049;668050;668051;668052;668053;668054;682740;682741;682742;682743;682744;682745;682746;682747;682748;682749;682750;682751;764969;764970;775403;775404	59124;204626;204627;204628;396558;396559;396560;467687;467688;467689;467690;467691;473995;473996;473997;473998;473999;474000;474001;474002;474003;474004;622697;622698;622699;622700;622701;622702;622703;622704;622705;622706;622707;622708;622709;622710;636453;636454;636455;636456;636457;636458;636459;636460;636461;713111;722830;722831	59124;204627;396559;467689;473999;622704;636458;713111;722830	600	940
409	sp|O15091|MRPP3_HUMAN	sp|O15091|MRPP3_HUMAN	Mitochondrial ribonuclease P catalytic subunit OS=Homo sapiens OX=9606 GN=PRORP PE=1 SV=2	2	2	2	1	2	2	2	3.9	3.9	3.9	67.315	583	583	0.00023202	4.3118	ESQLLLNVVSQLAK;LLDILSYLR		12312;31083	True;True	13420;33930	156214;156215;156216;156217;412125;412126;412127;412128;412129;412130;412131;412132;412133	145869;145870;145871;384627;384628;384629;384630;384631;384632;384633;384634	145869;384629
410	sp|O15111|IKKA_HUMAN	sp|O15111|IKKA_HUMAN	Inhibitor of nuclear factor kappa-B kinase subunit alpha OS=Homo sapiens OX=9606 GN=CHUK PE=1 SV=2	5	5	5	1	5	5	5	8.9	8.9	8.9	84.639	745	745	0	11.877	CFVLMDHILNLK;ESQILSLLSDIGSGIR;IISFLLPPDESLHSLQSR;IIVHTVQSQDR;IQLPIIQLR		5783;12309;23212;23271;24539	True;True;True;True;True	6299;13417;25321;25384;26811	75338;75339;156197;156198;156199;156200;303146;304570;304571;321677;321678;321679;321680;321681;321682;321683;321684;321685;321686	70267;145853;145854;145855;282952;284372;284373;300345;300346;300347;300348;300349;300350;300351;300352	70267;145853;282952;284372;300350
411	sp|O15116|LSM1_HUMAN	sp|O15116|LSM1_HUMAN	U6 snRNA-associated Sm-like protein LSm1 OS=Homo sapiens OX=9606 GN=LSM1 PE=1 SV=1	3	3	3	1	3	3	3	30.1	30.1	30.1	15.179	133	133	0.00025913	6.8804	MNYMPGTASLIEDIDKK;SIDQFANLVLHQTVER;TLIGFLR		36525;45314;50011	True;True;True	40336;50141;55308	484724;484725;484726;596843;596844;596845;596846;596847;596848;596849;596850;596851;596852;596853;660037;660038;660039;660040;660041;660042;660043;660044;660045;660046	452381;452382;556116;556117;556118;556119;556120;556121;556122;556123;556124;556125;556126;615156	452381;556118;615156	601;602	1;4
412	sp|O15118|NPC1_HUMAN	sp|O15118|NPC1_HUMAN	NPC intracellular cholesterol transporter 1 OS=Homo sapiens OX=9606 GN=NPC1 PE=1 SV=2	19	19	19	1	19	19	19	18.5	18.5	18.5	142.17	1278	1278	0	135.89	ALGLLCGK;AQAWEKEFINFVK;DNLQLPLQFLSR;DVEAPSSNDK;EFINFVK;EYFDQHFGPFFR;FLPMFLSDNPNPK;GAEDGTSVQASESCLFR;GGHAAYSSAVNILLGHGTR;LEKEYFDQHFGPFFR;LQGETLDQQLGR;NRLDIFCCVR;NSYSPLLLK;QRPQGGDFMR;SISQYLHAGPPVYFVLEEGHDYTSSK;TEQLIIR;VGATYFMTYHTVLQTSADFIDALKK;VTTNPVDLWSAPSSQAR;YNCEYSGPPKPLPK		2804;3884;8125;8793;10016;13040;14581;15962;17017;29009;33147;38896;39080;42144;45486;48889;53296;56470;59073	True;True;True;True;True;True;True;True;True;True;True;True;True;True;True;True;True;True;True	3038;4244;8866;9579;10911;14221;15903;15904;17447;18590;31669;36195;43195;43407;46730;50336;54087;58942;62469;65307	36144;36145;36146;36147;36148;36149;36150;36151;36152;50222;50223;50224;50225;50226;50227;50228;50229;50230;50231;105574;105575;105576;105577;105578;105579;105580;105581;105582;105583;105584;105585;105586;105587;105588;105589;105590;105591;113995;113996;113997;113998;113999;114000;128948;128949;165631;165632;165633;165634;165635;165636;165637;165638;185968;185969;185970;185971;185972;185973;18597…	33633;33634;33635;33636;33637;46722;46723;46724;46725;46726;46727;46728;46729;98882;98883;98884;98885;98886;98887;98888;98889;98890;98891;98892;98893;98894;98895;98896;98897;98898;106793;106794;106795;106796;120823;120824;154641;154642;154643;154644;154645;154646;154647;173442;173443;173444;173445;173446;173447;173448;173449;173450;173451;173452;173453;173454;173455;173456;173457;173458;173459;17…	33633;46725;98898;106795;120823;154641;173468;189857;202589;357497;409469;482529;484698;518400;558188;599970;656798;699066;731566	603	1001
413	sp|O15119|TBX3_HUMAN	sp|O15119|TBX3_HUMAN	T-box transcription factor TBX3 OS=Homo sapiens OX=9606 GN=TBX3 PE=1 SV=4	2	2	2	1	2	2	2	2.8	2.8	2.8	79.388	743	743	0.0039305	2.6868	AHLFAAERPR;LVSGLEAKPDR		1994;35025	True;True	2154;38224	25030;463166;463167;463168;463169;463170	23365;432447;432448;432449	23365;432449
414	sp|O15121|DEGS1_HUMAN	sp|O15121|DEGS1_HUMAN	Sphingolipid delta(4)-desaturase DES1 OS=Homo sapiens OX=9606 GN=DEGS1 PE=1 SV=1	6	6	6	1	6	6	6	26.3	26.3	26.3	37.866	323	323	0	45.904	EDFEWVYTDQPHADR;GHETYSYYGPLNLLTFNVGYHNEHHDFPNIPGK;IAAEYYDNLPHYNSWIK;KIAAEYYDNLPHYNSWIK;VLYDFVMDDTISPYSR;VSREDFEWVYTDQPHADR		9649;17199;21524;26471;54999;56107	True;True;True;True;True;True	10515;18784;23505;28920;60811;60812;62080	124934;219652;219653;219654;219655;219656;219657;219658;219659;219660;219661;219662;219663;219664;219665;219666;280850;280851;280852;280853;280854;280855;280856;280857;280858;347780;347781;347782;347783;347784;729024;729025;729026;729027;729028;729029;729030;729031;745031;745032;745033;745034;745035;745036;745037;745038;745039;745040;745041;745042;745043;745044;745045;745046;745047	117101;204629;204630;204631;204632;204633;204634;204635;204636;204637;204638;204639;204640;204641;204642;204643;204644;262306;262307;262308;262309;262310;262311;262312;262313;262314;324655;324656;324657;324658;324659;679720;679721;679722;679723;679724;679725;679726;679727;694585;694586;694587;694588;694589;694590;694591;694592;694593;694594;694595;694596;694597;694598;694599;694600;694601	117101;204633;262306;324657;679723;694593	604	302
415	sp|O15126|SCAM1_HUMAN	sp|O15126|SCAM1_HUMAN	Secretory carrier-associated membrane protein 1 OS=Homo sapiens OX=9606 GN=SCAMP1 PE=1 SV=2	8	8	8	1	8	8	8	39.6	39.6	39.6	37.92	338	338	0	24.311	AQQEFATGVMSNK;EHALAQAELLK;EMQNLSQHGR;MPNVPNTQPAIMKPTEEHPAYTQIAK;NVPPGLDEYNPFSDSR;SDFDSNPFADPDLNNPFKDPSVTQVTR;TTGASFEK;TVQTAAANAASTAASSAAQNAFK		4069;10426;11622;36555;39395;44250;51285;51732	True;True;True;True;True;True;True;True	4444;4445;11354;12661;40383;43759;48978;56739;57231	53317;53318;53319;53320;53321;133643;133644;133645;133646;133647;133648;133649;133650;133651;133652;133653;133654;133655;133656;148530;148531;485547;523882;523883;583299;583300;583301;583302;583303;675791;675792;682598;682599;682600;682601;682602;682603;682604;682605;682606;682607;682608	49793;49794;49795;49796;49797;125133;125134;125135;125136;125137;125138;125139;125140;125141;125142;125143;125144;125145;125146;138842;138843;453187;488705;488706;543532;543533;543534;543535;543536;543537;543538;629868;629869;636323;636324;636325;636326;636327;636328;636329;636330;636331;636332;636333	49793;125140;138842;453187;488706;543532;629868;636328	605	308
416	sp|O15127|SCAM2_HUMAN	sp|O15127|SCAM2_HUMAN	Secretory carrier-associated membrane protein 2 OS=Homo sapiens OX=9606 GN=SCAMP2 PE=1 SV=2	3	3	3	1	3	3	3	13.7	13.7	13.7	36.648	329	329	0	82.971	AASSAAQGAFQGN;ELQNTVANLHVR;TGASFQQAQEEFSQGIFSSR		534;11406;49145	True;True;True	573;12406;54365	6062;6063;6064;6065;145904;145905;145906;145907;145908;145909;145910;145911;145912;145913;145914;145915;145916;145917;145918;145919;145920;145921;145922;145923;145924;145925;145926;145927;145928;145929;145930;145931;145932;145933;145934;145935;145936;647475;647476;647477;647478;647479;647480;647481;647482;647483;647484;647485;647486;647487;647488;647489	5635;5636;5637;5638;136379;136380;136381;136382;136383;136384;136385;136386;136387;136388;136389;136390;136391;136392;136393;136394;136395;136396;136397;136398;136399;136400;136401;136402;136403;136404;136405;136406;136407;136408;136409;136410;603325;603326;603327;603328;603329;603330;603331;603332;603333;603334;603335;603336;603337;603338;603339	5637;136383;603325
417	sp|O15143|ARC1B_HUMAN	sp|O15143|ARC1B_HUMAN	Actin-related protein 2/3 complex subunit 1B OS=Homo sapiens OX=9606 GN=ARPC1B PE=1 SV=3	24	24	22	1	24	24	22	61.8	61.8	55.6	40.949	372	372	0	323.31	ASSEGGTAAGAGLDSLHK;AYHSFLVEPISCHAWNK;AYHSFLVEPISCHAWNKDR;CSQFCTTGMDGGMSIWDVK;DRTQIAICPNNHEVHIYEK;EHNGQVTGIDWAPESNR;ERFQNLDK;EVEERPAPTPWGSK;FAVGSGSR;IFSAYIK;IVTCGTDR;KASSEGGTAAGAGLDSLHK;NAYVWTLK;NSVSQISVLSGGK;PTLVILR;SLESALKDLK;STVLSLDWHPNNVLLAAGSCDFK;TQIAICPNNHEVHIYEK;TWKPTLVILR;VAWVSHDSTVCLADADK;VAWVSHDSTVCLADADKK;VHELKEHNGQVTGIDWAPESNR;WAPNENK;WAPNENKFAVGSGSR		4463;5480;5481;6221;8434;10488;12109;12686;13324;22486;25565;25916;37205;39064;40059;45806;47685;50843;51849;52430;52431;53611;57258;57259	True;True;True;True;True;True;True;True;True;True;True;True;True;True;True;True;True;True;True;True;True;True;True;True	4868;5974;5975;6780;9199;11425;13198;13829;14528;24537;27947;28319;41323;43386;44465;50678;52751;56253;57360;58007;58008;59286;63325;63326	58486;58487;58488;58489;58490;58491;58492;58493;58494;58495;58496;58497;58498;58499;58500;58501;58502;58503;58504;58505;58506;58507;58508;58509;58510;58511;58512;58513;58514;58515;58516;58517;58518;71077;71078;71079;71080;71081;71082;71083;71084;71085;71086;71087;71088;71089;71090;71091;71092;71093;71094;71095;71096;71097;71098;71099;71100;71101;71102;71103;71104;71105;71106;71107;71108;71109;711…	54535;54536;54537;54538;54539;54540;54541;54542;54543;54544;54545;54546;54547;54548;54549;54550;54551;54552;54553;54554;54555;54556;54557;54558;54559;66247;66248;66249;66250;66251;66252;66253;66254;66255;66256;66257;66258;66259;66260;66261;66262;66263;66264;66265;66266;66267;66268;66269;66270;66271;66272;66273;66274;66275;66276;66277;66278;66279;66280;66281;66282;66283;66284;66285;66286;66287;662…	54544;66250;66315;75036;102324;126171;143901;150553;158534;273418;312842;317409;462615;484455;495571;562184;585135;624820;638015;646586;646605;661106;709210;709212
418	sp|O15144|ARPC2_HUMAN	sp|O15144|ARPC2_HUMAN	Actin-related protein 2/3 complex subunit 2 OS=Homo sapiens OX=9606 GN=ARPC2 PE=1 SV=1	26	26	26	1	26	26	26	80.3	80.3	80.3	34.333	300	300	0	323.31	ASHTAPQVLFSHR;ASHTAPQVLFSHREPPLELK;AVIHYRDDETMYVESK;DDETMYVESK;DNTINLIHTFR;DNTINLIHTFRDYLHYHIK;DSIVHQAGMLK;DSIVHQAGMLKR;DYLHYHIK;ELQAHGADELLK;ELQAHGADELLKR;EPPLELKDTDAAVGDNIGYITFVLFPR;FENAAAGNKPEAVEVTFADFDGVLYHISNPNGDK;FYKELQAHGADELLK;IIEETLALK;MILLEVNNR;NCFASVFEK;RASHTAPQVLFSHR;RNCFASVFEK;VFMQEFK;VMVSISLK;VTVVFSTVFK;VTVVFSTVFKDDDDVVIGK;VYGSFLVNPESGYNVSLLYDLENLPASK;YFQFQEEGK;YFQFQEEGKEGENR		4341;4342;5077;6660;8159;8160;8532;8533;9067;11381;11382;11856;13598;15834;23016;36126;37212;42793;43402;53168;55113;56510;56511;57118;58282;58283	True;True;True;True;True;True;True;True;True;True;True;True;True;True;True;True;True;True;True;True;True;True;True;True;True;True	4736;4737;5532;5533;7251;7252;8908;8909;9302;9303;9304;9305;9878;12379;12380;12924;14824;17306;25110;39705;39706;41332;47423;48067;58801;58802;60977;60978;62511;62512;63177;64429;64430	56936;56937;56938;56939;56940;56941;56942;56943;56944;56945;56946;56947;56948;56949;56950;56951;56952;56953;56954;56955;56956;56957;56958;56959;56960;56961;56962;56963;56964;56965;56966;56967;56968;56969;56970;56971;56972;56973;56974;56975;56976;56977;56978;56979;56980;56981;56982;56983;56984;56985;56986;56987;56988;56989;56990;56991;56992;56993;56994;56995;56996;56997;56998;56999;57000;57001;570…	53114;53115;53116;53117;53118;53119;53120;53121;53122;53123;53124;53125;53126;53127;53128;53129;53130;53131;53132;53133;53134;53135;53136;53137;53138;53139;53140;53141;53142;53143;53144;53145;53146;53147;53148;53149;53150;53151;53152;53153;53154;53155;53156;53157;53158;53159;53160;53161;53162;53163;53164;53165;53166;53167;53168;53169;53170;53171;53172;53173;53174;53175;53176;53177;53178;53179;531…	53116;53188;61842;80739;99466;99505;103347;103399;109723;136106;136137;141204;161580;188325;280259;446842;462700;525955;533364;655430;681575;699675;699682;707563;721206;721235	606;607;608;609	1;56;115;152
419	sp|O15145|ARPC3_HUMAN	sp|O15145|ARPC3_HUMAN	Actin-related protein 2/3 complex subunit 3 OS=Homo sapiens OX=9606 GN=ARPC3 PE=1 SV=3	11	11	11	1	11	11	11	65.7	65.7	65.7	20.546	178	178	0	128.24	AYLQQLR;DTDIVDEAIYYFK;ETKDTDIVDEAIYYFK;LIGNMALLPIR;NYEIKNEADR;PANKQEDEVMR;PAYHSSLMDPDTK;QEDEVMR;SLSGPGQ;SQGEKEMYTLGITNFPIPGEPGFPLNAIYAK;VFDPQNDKPSK		5509;8644;12477;30433;39517;39644;39688;40525;46187;46873;53072	True;True;True;True;True;True;True;True;True;True;True	6004;9421;13601;33226;33227;43888;44021;44022;44067;44068;44968;51090;51871;58693	71480;71481;71482;71483;71484;71485;111917;111918;111919;111920;158288;158289;158290;158291;158292;158293;158294;158295;158296;403166;403167;403168;403169;403170;403171;403172;403173;403174;403175;403176;403177;403178;403179;403180;403181;403182;403183;403184;403185;403186;403187;403188;403189;403190;403191;403192;403193;403194;403195;403196;403197;403198;403199;403200;403201;403202;403203;403204…	66622;66623;66624;66625;104850;104851;104852;104853;104854;147837;147838;147839;147840;147841;147842;147843;147844;147845;376319;376320;376321;376322;376323;376324;376325;376326;376327;376328;376329;376330;376331;376332;376333;376334;376335;376336;376337;376338;376339;376340;376341;376342;376343;376344;376345;376346;376347;376348;376349;376350;376351;376352;376353;376354;376355;376356;376357;3763…	66623;104853;147838;376337;490021;491478;492021;500833;567441;575517;654178	610;611;612;613	9;19;95;129
421	sp|O15160|RPAC1_HUMAN	sp|O15160|RPAC1_HUMAN	DNA-directed RNA polymerases I and III subunit RPAC1 OS=Homo sapiens OX=9606 GN=POLR1C PE=1 SV=1	10	10	10	1	10	10	10	39.3	39.3	39.3	39.249	346	346	0	34.75	AASQAVEEMR;CFSPGVIEVQEVQGK;DSSDPNELYVNHK;FSPVATASYR;ILLAEVPTMAVEK;LGLIPIHADPR;LLPDITLLEPVEGEAAEELSR;NQGDEEGTEIDTLQFR;VLVYNNTSIVQDEILAHR;VVLGEFGVR		529;5777;8594;15355;23692;29850;31691;38795;54991;56754	True;True;True;True;True;True;True;True;True;True	568;6293;9369;16784;25837;25838;32588;34579;43086;60802;62783	6017;6018;6019;6020;75301;75302;111136;111137;111138;111139;111140;195597;195598;195599;195600;310633;310634;310635;310636;310637;310638;310639;310640;310641;310642;310643;310644;310645;310646;310647;310648;310649;394910;394911;394912;394913;394914;394915;394916;394917;394918;394919;394920;394921;394922;419884;419885;419886;419887;419888;419889;419890;419891;419892;419893;419894;419895;419896;419…	5594;5595;70235;70236;104066;104067;104068;104069;182330;182331;182332;182333;289967;289968;289969;289970;289971;289972;289973;289974;289975;289976;289977;289978;289979;289980;289981;289982;368607;368608;368609;368610;368611;368612;368613;368614;368615;368616;368617;368618;368619;391943;391944;391945;391946;391947;391948;391949;391950;391951;391952;391953;391954;391955;391956;391957;391958;391959…	5595;70235;104068;182331;289980;368613;391950;481323;679600;703365	614	87
423	sp|O15173|PGRC2_HUMAN	sp|O15173|PGRC2_HUMAN	Membrane-associated progesterone receptor component 2 OS=Homo sapiens OX=9606 GN=PGRMC2 PE=1 SV=1	9	8	8	1	9	8	8	32.3	32.3	32.3	23.818	223	223	0	49.933	DFSLEQLR;EKYDYVGR;FYGPAGPYGIFAGR;GLATFCLDK;GLATFCLDKDALR;GLGAGAGAGEESPATSLPR;ILLAVNGK;RDFSLEQLR;RGLGAGAGAGEESPATSLPR		6892;10926;15822;17692;17693;17825;23695;42822;43020	True;True;True;False;True;True;True;True;True	7505;11892;17293;19317;19318;19453;25842;47454;47666	89139;89140;89141;89142;89143;89144;89145;89146;89147;89148;89149;89150;89151;89152;89153;89154;89155;89156;89157;89158;89159;89160;89161;140256;140257;140258;140259;140260;140261;140262;140263;140264;140265;140266;201854;201855;201856;201857;201858;201859;201860;201861;201862;201863;201864;201865;201866;201867;201868;201869;201870;201871;201872;201873;201874;201875;201876;201877;201878;201879;20…	83440;83441;83442;83443;83444;83445;83446;83447;83448;83449;83450;83451;83452;83453;83454;83455;83456;83457;83458;83459;131290;131291;131292;131293;131294;188126;188127;188128;188129;188130;188131;188132;188133;188134;188135;188136;188137;188138;188139;188140;188141;188142;188143;188144;188145;188146;188147;188148;188149;188150;188151;188152;188153;188154;188155;188156;188157;188158;188159;188160…	83446;131291;188148;210950;210973;212352;290052;526335;528471
424	sp|O15212|PFD6_HUMAN	sp|O15212|PFD6_HUMAN	Prefoldin subunit 6 OS=Homo sapiens OX=9606 GN=PFDN6 PE=1 SV=1	3	3	3	1	3	3	3	23.3	23.3	23.3	14.582	129	129	0	7.5343	ETLAQLQQEFQR;LLGPVLVK;RLDYITAEIK		12479;31377;43198	True;True;True	13603;34242;47852	158311;158312;158313;158314;158315;158316;158317;158318;158319;158320;158321;415936;415937;415938;415939;415940;415941;415942;415943;415944;415945;570417	147858;147859;147860;147861;147862;147863;147864;147865;147866;388264;388265;388266;388267;388268;388269;531597	147858;388264;531597
425	sp|O15228|GNPAT_HUMAN	sp|O15228|GNPAT_HUMAN	Dihydroxyacetone phosphate acyltransferase OS=Homo sapiens OX=9606 GN=GNPAT PE=1 SV=1	6	6	6	1	6	6	6	12.5	12.5	12.5	77.187	680	680	0	14.717	AIQEHPVVLLPSHR;ESLQSVDVLREEVSEILDEMSHK;EVFDTYLVPISISYDK;FGLLNIVMEPFFK;FGLLNIVMEPFFKR;ILEETLYVYELLGVPKPK		2307;12266;12710;13891;13892;23527	True;True;True;True;True;True	2502;13371;13855;15147;15148;25662	29583;29584;29585;29586;29587;29588;155809;155810;155811;155812;155813;155814;155815;155816;155817;155818;155819;161461;161462;176897;176898;176899;176900;176901;176902;308021;308022;308023	27644;27645;27646;145506;145507;145508;145509;145510;145511;145512;145513;145514;150792;150793;165055;165056;165057;287506;287507	27646;145508;150793;165056;165057;287507
426	sp|O15231|ZN185_HUMAN	sp|O15231|ZN185_HUMAN	Zinc finger protein 185 OS=Homo sapiens OX=9606 GN=ZNF185 PE=1 SV=3	6	6	6	1	6	6	6	10.6	10.6	10.6	73.525	689	689	0.00024313	5.286	ANGTPKSAASLVR;EYVNASEVSSGKPVSAR;MSISALGGR;PMGDLLDQIFIHR;TIELPSGR;VGEAWQDRPGAPR		3495;13125;36711;39950;49534;53321	True;True;True;True;True;True	3825;14310;40623;44341;54784;58967	45072;166637;166638;166639;487953;487954;487955;487956;530161;530162;530163;530164;530165;653662;653663;653664;653665;704894;704895	41900;155570;455387;455388;455389;494456;494457;494458;609207;609208;657163;657164	41900;155570;455389;494458;609208;657164	616	1
427	sp|O15234|CASC3_HUMAN	sp|O15234|CASC3_HUMAN	Protein CASC3 OS=Homo sapiens OX=9606 GN=CASC3 PE=1 SV=2	2	2	2	1	2	2	2	5.5	5.5	5.5	76.277	703	703	0.0029356	2.8579	LAEEVPPPPEGLIPAPPVPETTPTPPTK;SAHNPDDIKPR		27813;43948	True;True	30374;48654	367800;367801;579980;579981;579982;579983;579984	343051;343052;540486;540487	343052;540486
428	sp|O15235|RT12_HUMAN	sp|O15235|RT12_HUMAN	Small ribosomal subunit protein uS12m OS=Homo sapiens OX=9606 GN=MRPS12 PE=1 SV=1	2	2	2	1	2	2	2	14.5	14.5	14.5	15.173	138	138	0.0029474	2.9019	GVVLCTFTR;LGPTEGRPQLK		19603;29946	True;True	21417;32694	251464;251465;251466;251467;251468;251469;251470;251471;251472;251473;396384;396385;396386;396387;396388;396389;396390;396391;396392;396393;396394;396395;396396	234254;234255;234256;234257;234258;234259;234260;234261;234262;369965;369966;369967;369968;369969;369970;369971;369972;369973	234255;369969
429	sp|O15254|ACOX3_HUMAN	sp|O15254|ACOX3_HUMAN	Peroxisomal acyl-coenzyme A oxidase 3 OS=Homo sapiens OX=9606 GN=ACOX3 PE=1 SV=2	5	5	5	1	5	5	5	9.6	9.6	9.6	77.628	700	700	0	9.6086	LLPYLAAVYALDHFSK;LSALYALWSLSR;PLALAFVELTVVQR;SLFLDLVELQR;TIFSALENDPLFAR		31749;33659;39858;45833;49548	True;True;True;True;True	34639;36747;44243;50706;54799	420641;420642;420643;420644;444852;444853;444854;444855;444856;529213;529214;603676;603677;603678;603679;603680;603681;603682;603683;603684;653845	392649;392650;392651;392652;415358;415359;415360;415361;415362;493610;493611;493612;562461;562462;562463;562464;562465;562466;562467;562468;609382	392650;415362;493611;562465;609382
430	sp|O15258|RER1_HUMAN	sp|O15258|RER1_HUMAN	Protein RER1 OS=Homo sapiens OX=9606 GN=RER1 PE=1 SV=1	6	6	6	1	6	6	6	37.2	37.2	37.2	22.958	196	196	0	40.833	FWHAATK;LGQIYQSWLDK;QNEEFRPFIR;SEGDSVGESVHGKPSVVYR;VDPSLMEDSDDGPSLPTK;YIPFTHGK		15766;29965;41779;44477;52686;58659	True;True;True;True;True;True	17235;32717;46342;49222;49223;58278;58279;64846	201172;201173;201174;201175;201176;201177;201178;201179;396553;396554;396555;396556;396557;396558;396559;396560;396561;396562;396563;396564;396565;396566;396567;396568;396569;396570;396571;396572;396573;396574;396575;396576;396577;396578;396579;396580;396581;396582;396583;396584;396585;396586;396587;396588;396589;552067;552068;552069;552070;552071;552072;552073;552074;552075;552076;552077;552078;…	187486;187487;187488;187489;370107;370108;370109;370110;370111;370112;370113;370114;370115;370116;370117;370118;370119;370120;370121;370122;370123;370124;370125;370126;370127;370128;370129;370130;370131;370132;370133;370134;370135;370136;370137;370138;370139;370140;370141;514580;514581;514582;514583;514584;514585;514586;514587;514588;514589;514590;514591;514592;514593;514594;514595;514596;514597;…	187487;370110;514588;546003;649492;726377	617	92
431	sp|O15260|SURF4_HUMAN	sp|O15260|SURF4_HUMAN	Surfeit locus protein 4 OS=Homo sapiens OX=9606 GN=SURF4 PE=1 SV=3	8	8	8	1	8	8	8	33.1	33.1	33.1	30.394	269	269	0	50.261	GQNDLMGTAEDFADQFLR;LCLISTFLEDGIR;MWFQWSEQR;NLALGGGLLLLLAESR;PMHDFLK;QYLPHVAR;QYMQLGGR;SMFAGVPTMR		18725;28376;36963;38057;39951;42687;42695;46338	True;True;True;True;True;True;True;True	20465;20466;30997;41033;41034;42246;44342;47307;47318;51256;51257;51258	240045;240046;240047;240048;240049;240050;240051;240052;240053;240054;240055;240056;240057;240058;240059;240060;240061;240062;240063;375377;375378;375379;375380;375381;375382;375383;375384;375385;375386;375387;375388;375389;375390;375391;375392;375393;375394;375395;375396;375397;375398;375399;375400;375401;375402;375403;375404;375405;375406;375407;375408;375409;375410;375411;375412;375413;375414;…	223726;223727;223728;223729;223730;223731;223732;223733;223734;223735;223736;223737;223738;223739;223740;350079;350080;350081;350082;350083;350084;350085;350086;350087;350088;350089;350090;350091;350092;350093;350094;350095;350096;350097;350098;350099;350100;350101;350102;350103;350104;350105;350106;350107;350108;350109;350110;350111;350112;350113;350114;350115;350116;350117;350118;350119;350120;…	223731;350090;459400;472153;494460;524730;524843;569278	618;619;620;621;622	7;44;141;148;157
432	sp|O15269|SPTC1_HUMAN	sp|O15269|SPTC1_HUMAN	Serine palmitoyltransferase 1 OS=Homo sapiens OX=9606 GN=SPTLC1 PE=1 SV=1	16	16	16	1	16	16	16	42.9	42.9	42.9	52.743	473	473	0	53.941	AAALASLKK;AACFAIQK;CLPPPSIR;DHPALNYNIVSGPPSHK;EKEELIEEWQPEPLVPPVPK;EQEIEDQKNPR;HNDMADLER;IFLEESLSFGVLGEHGR;LLQEIVDQCMNR;RGDIVFVDR;SFVIDHQR;SIALTQAR;TEEAIIYSYGFATIASAIPAYSK;VVGESLSPAFHLQLEESTGSR;VVVTVEQTEEELER;YGVGTCGPR		64;119;5996;7176;10825;11924;20837;22426;31783;42976;44852;45287;48769;56678;56973;58491	True;True;True;True;True;True;True;True;True;True;True;True;True;True;True;True	66;127;6528;7822;11780;12996;22760;24474;34673;47620;49632;50112;53952;62702;63022;64663	600;601;602;1296;1297;1298;1299;1300;1301;1302;1303;1304;1305;1306;1307;1308;77756;93027;93028;93029;93030;93031;93032;93033;93034;93035;93036;93037;93038;93039;93040;138976;138977;151887;151888;151889;151890;151891;151892;151893;151894;151895;151896;151897;151898;151899;151900;151901;151902;151903;151904;151905;151906;269088;269089;269090;269091;292263;292264;421479;421480;566601;566602;590266;5…	552;553;554;1222;1223;1224;1225;1226;1227;1228;1229;1230;1231;1232;1233;72495;87020;87021;87022;87023;87024;87025;87026;87027;87028;87029;87030;130084;130085;130086;141914;141915;141916;141917;141918;141919;141920;141921;141922;141923;141924;141925;141926;141927;141928;141929;141930;250878;250879;250880;272853;272854;393614;393615;527879;527880;549984;549985;549986;549987;549988;549989;549990;549…	553;1222;72495;87029;130085;141924;250880;272854;393614;527880;549993;555834;598667;702134;706055;723813
433	sp|O15270|SPTC2_HUMAN	sp|O15270|SPTC2_HUMAN	Serine palmitoyltransferase 2 OS=Homo sapiens OX=9606 GN=SPTLC2 PE=1 SV=1	8	8	8	1	8	8	8	26.2	26.2	26.2	62.924	562	562	0	74.412	AYLYLDEAHSIGALGPTGR;EILDTALKEIDEVGDLLQLK;GCLILSDELNHASLVLGAR;HNNMQSLEK;LVPLLDRPFDETTYEETED;NIGVVVVGFPATPIIESR;QEIGNLDKHEELEELVAR;THSHSAVYATSLSPPVVEQIITSMK		5512;10675;16253;20875;34950;37840;40571;49443	True;True;True;True;True;True;True;True	6007;11622;17766;22801;38143;42009;45021;54688	71521;137032;207816;207817;207818;207819;207820;269546;269547;269548;462075;462076;462077;462078;462079;503382;503383;503384;503385;503386;503387;503388;503389;503390;503391;503392;503393;503394;503395;537554;537555;537556;537557;537558;652281	66658;128279;193671;193672;251289;251290;431446;469706;469707;469708;469709;469710;469711;469712;469713;469714;469715;469716;469717;469718;469719;501175;501176;501177;501178;607900	66658;128279;193672;251290;431446;469708;501176;607900
434	sp|O15294|OGT1_HUMAN	sp|O15294|OGT1_HUMAN	UDP-N-acetylglucosamine--peptide N-acetylglucosaminyltransferase 110 kDa subunit OS=Homo sapiens OX=9606 GN=OGT PE=1 SV=3	27	27	27	1	27	27	27	34	34	34	116.92	1046	1046	0	150.6	AATGEEVPR;AFLDSLPDVK;AIELQPHFPDAYCNLANALK;AIQINPAFADAHSNLASIHK;ALEVFPEFAAAHSNLASVLQQQGK;ALSLSPNHAVVHGNLACVYYEQGLIDLAIDTYRR;ASSVGNVADSTEPTKR;EQGNIEEAVR;EYQAGDFEAAER;FPAVGEPNIQQYAQNMGLPQNR;GQLQEAIEHYR;HGNLCLDK;IDPSTLQMWANILK;IIFSPVAPK;ISSPLFNTK;IVLNGIDLK;KALEVFPEFAAAHSNLASVLQQQGK;LCPTHADSLNNLANIKR;LGTDLEYLKK;LQEALMHYK;LVSIVADQLEK;MLSFQGLAELAHR;QEPDNTGVLLLLSSIHFQCR;QNPLLAEAYSNLGNVYK;RVPNSVLWLLR;SAHF…		554;1449;2127;2311;2749;3176;4487;11948;13083;14888;18715;20291;22027;23042;24991;25483;25884;28403;30022;33050;35033;36372;40615;41831;43774;43946;55487	True;True;True;True;True;True;True;True;True;True;True;True;True;True;True;True;True;True;True;True;True;True;True;True;True;True;True	594;1561;2302;2507;2982;3439;4893;13020;14267;16269;20453;22158;24051;25138;27322;27858;28285;31027;32784;36092;38233;40090;40091;45068;46398;48467;48651;61408	6238;6239;17038;17039;17040;17041;17042;17043;17044;17045;17046;17047;17048;17049;17050;17051;17052;17053;26895;26896;26897;26898;29654;29655;29656;29657;29658;29659;29660;29661;29662;29663;29664;29665;29666;29667;35544;35545;35546;35547;35548;35549;35550;35551;35552;35553;40831;58749;58750;58751;152124;166097;189994;189995;239943;260993;260994;260995;260996;260997;287390;287391;287392;287393;287…	5803;15812;15813;15814;15815;15816;15817;15818;15819;15820;15821;15822;25088;25089;27710;27711;27712;27713;27714;27715;27716;27717;27718;27719;33091;33092;33093;33094;33095;33096;33097;33098;33099;33100;37979;54762;142113;155070;177176;223636;243257;243258;243259;243260;268328;268329;268330;268331;268332;268333;268334;280613;280614;280615;280616;280617;280618;280619;305929;305930;305931;305932;30…	5803;15816;25088;27719;33092;37979;54762;142113;155070;177176;223636;243258;268330;280613;305931;311964;316860;350355;370712;408486;432630;450278;501677;515012;538495;540431;686425	623;624	18;893
435	sp|O15305|PMM2_HUMAN	sp|O15305|PMM2_HUMAN	Phosphomannomutase 2 OS=Homo sapiens OX=9606 GN=PMM2 PE=1 SV=1	9	8	8	1	9	8	8	43.1	40.2	40.2	28.082	246	246	0	19.54	AAPGPALCLFDVDGTLTAPR;EMDDFLQK;GTFIEFR;IEFYELDKK;IGVVGGSDFEK;NGMLNVSPIGR;TMGYSVTAPEDTRR;VQEQLGNDVVEK;VQEQLGNDVVEKYDYVFPENGLVAYK		436;11559;19205;22172;22804;37655;50349;55650;55651	True;True;False;True;True;True;True;True;True	467;12569;20977;24201;24882;41806;41807;55687;55688;61581;61582	4868;4869;147772;147773;147774;147775;147776;147777;147778;147779;147780;245719;289068;289069;289070;289071;289072;289073;289074;289075;289076;289077;289078;289079;289080;289081;289082;289083;289084;289085;297134;297135;297136;297137;297138;297139;297140;297141;501182;501183;501184;501185;501186;501187;501188;501189;501190;501191;501192;501193;501194;501195;501196;501197;501198;664156;664157;6641…	4524;4525;138097;138098;138099;138100;138101;138102;228854;269893;269894;269895;269896;269897;269898;269899;269900;269901;269902;269903;269904;269905;269906;269907;269908;277296;277297;277298;277299;277300;467695;467696;467697;467698;467699;467700;467701;467702;467703;467704;467705;467706;467707;467708;467709;467710;618983;618984;618985;618986;618987;618988;618989;618990;618991;618992;618993;6189…	4524;138101;228854;269902;277300;467702;618991;688846;688851	625;626	126;227
436	sp|O15321|TM9S1_HUMAN	sp|O15321|TM9S1_HUMAN	Transmembrane 9 superfamily member 1 OS=Homo sapiens OX=9606 GN=TM9SF1 PE=1 SV=2	3	3	3	1	3	3	3	5.6	5.6	5.6	68.86	606	606	0.00045935	4.165	AGDPVILYVNK;NNASPFDAPCR;SLSLGEVLDGDR		1636;38508;46192	True;True;True	1769;42772;51096	19511;19512;19513;19514;19515;19516;19517;512384;609007;609008;609009;609010;609011	18133;18134;18135;18136;18137;18138;18139;478029;567494;567495;567496;567497;567498	18133;478029;567498
437	sp|O15327|INP4B_HUMAN	sp|O15327|INP4B_HUMAN	Inositol polyphosphate 4-phosphatase type II OS=Homo sapiens OX=9606 GN=INPP4B PE=1 SV=4	9	9	9	1	9	9	9	14.9	14.9	14.9	104.74	924	924	0	41.191	ALLENLLQNIQSK;DALYDVITVGAPAAHFQGFK;EHYVVEVK;EVLSNINQLQPLIATHADLLLNSASQHSPDSLK;KLNTLVQISVIHPVEQSLTR;MFESLPLQIK;SALLALYTAR;SNDVLPVITGR;TLEFVPINLHLQR		2925;6517;10534;12828;26819;35878;43988;46414;49905	True;True;True;True;True;True;True;True;True	3162;7095;11473;13986;29299;39323;48696;51367;55192	37887;37888;37889;37890;37891;37892;37893;37894;37895;84395;84396;84397;135464;162770;352794;352795;474567;474568;474569;474570;580352;580353;580354;580355;580356;611858;658728;658729;658730;658731;658732;658733;658734;658735;658736;658737	35274;35275;35276;35277;35278;35279;35280;78952;78953;126852;151981;329176;442973;442974;442975;442976;540816;540817;540818;570167;613943;613944;613945;613946;613947;613948;613949;613950;613951;613952	35278;78952;126852;151981;329176;442976;540818;570167;613943
438	sp|O15347|HMGB3_HUMAN	sp|O15347|HMGB3_HUMAN	High mobility group protein B3 OS=Homo sapiens OX=9606 GN=HMGB3 PE=1 SV=4	5	5	5	1	5	5	5	20	20	20	22.98	200	200	0	11.692	KNPEVPVNFAEFSK;MSAYAFFVQTCR;NPEVPVNFAEFSK;STNPGISIGDVAK;STNPGISIGDVAKK		27003;36692;38658;47595;47596	True;True;True;True;True	29503;40593;40594;42935;52654;52655	355057;355058;355059;355060;355061;355062;355063;355064;355065;355066;487690;487691;487692;514134;514135;514136;514137;514138;514139;514140;514141;514142;514143;514144;626727;626728;626729;626730;626731;626732;626733;626734;626735;626736;626737;626738;626739;626740	331180;331181;331182;331183;331184;331185;331186;331187;331188;455141;455142;479668;479669;479670;479671;479672;479673;479674;479675;479676;479677;479678;583953;583954;583955;583956;583957;583958;583959;583960;583961;583962;583963;583964;583965	331185;455142;479671;583956;583965	627	13
439	sp|O15355|PPM1G_HUMAN	sp|O15355|PPM1G_HUMAN	Protein phosphatase 1G OS=Homo sapiens OX=9606 GN=PPM1G PE=1 SV=1	12	12	12	1	12	12	12	31.1	31.1	31.1	59.271	546	546	0	44.412	AIGDHFYK;ALDMSYDHKPEDEVELAR;ALEDAFLAIDAK;CSGDGVGAPR;EEPGSDSGTTAVVALIR;ETPSQENGPTAK;GTEAGQVGEPGIPTGEAGPSCSSASDKLPR;LPLPYGFSAMQGWR;NLPPEEQMISALPDIK;NTAELQPESGKR;QLIVANAGDSR;YLPDIIKDQK		2171;2638;2666;6197;9902;12521;19176;32724;38328;39083;41445;58932	True;True;True;True;True;True;True;True;True;True;True;True	2348;2862;2893;6754;10790;13650;20947;35748;42544;43410;45961;65138	27385;27386;27387;33865;33866;33867;33868;33869;34263;34264;34265;34266;34267;34268;34269;34270;34271;80149;80150;80151;80152;80153;80154;127866;127867;127868;159012;159013;159014;159015;159016;159017;159018;159019;159020;159021;159022;245379;245380;245381;245382;433348;433349;433350;433351;433352;433353;433354;433355;433356;433357;433358;433359;509326;509327;509328;509329;509330;509331;519554;51…	25530;31518;31519;31520;31521;31888;31889;31890;31891;31892;31893;74780;74781;74782;74783;74784;119827;119828;119829;148497;148498;148499;148500;148501;148502;148503;148504;148505;148506;228560;228561;228562;404701;404702;404703;404704;404705;404706;404707;404708;404709;475093;475094;475095;475096;475097;484719;484720;484721;484722;484723;484724;484725;484726;484727;484728;484729;484730;484731;48…	25530;31519;31892;74782;119829;148503;228560;404705;475093;484730;510894;729765
440	sp|O15357|SHIP2_HUMAN	sp|O15357|SHIP2_HUMAN	Phosphatidylinositol 3,4,5-trisphosphate 5-phosphatase 2 OS=Homo sapiens OX=9606 GN=INPPL1 PE=1 SV=2	30	30	29	1	30	30	29	30.7	30.7	29.9	138.6	1258	1258	0	54.32	AAAEELLAR;AHPRPPLPPGPSPASTFLGEVASGDDR;DFLSGIQK;EAFCQLLQLMK;GGASHLPHLTR;GSYGLDLEAVR;ILPDGEDFLAVQTSQGVPVRR;ISHVSTSSVK;KEFEPLLR;KPAFTEASCPLSR;LDVTLGDLTK;LHSEVDKVLSGLEILSK;LKPEGAPEPEGVAAPPPK;LLLDTLQLSK;LLQQQNLPQTGEQELESLVLK;LLSLGDR;NSFNNPAYYVLEGVPHQLLPPEPPSPAR;NVTSWFTSK;QLNAFDISLR;QLPTLKPILADIEYLQDQHLLLTVK;RNQNYLDILR;SALLPGPLELQPPR;SMIGSTAQQFLTFLSHR;TGIANTLGNK;TIPVQAFEVK;TLSEVDYAPAGPAR;VAVLVKPEHENR;V…		40;2010;6858;9230;16949;19130;23768;24842;26083;27031;28754;30248;30863;31515;31819;31898;38945;39440;41527;41558;43425;43991;46353;49208;49648;50203;52407;52693;54820;55872	True;True;True;True;True;True;True;True;True;True;True;True;True;True;True;True;True;True;True;True;True;True;True;True;True;True;True;True;True;True	42;2173;7466;10056;10057;18516;20898;25931;27140;28502;29535;31406;33033;33701;34389;34712;34798;43253;43808;46049;46081;48092;48699;51280;51281;54433;54910;55518;57983;58287;60618;61822	386;25246;88812;119251;119252;119253;119254;119255;119256;119257;119258;119259;119260;216583;216584;216585;216586;216587;216588;216589;216590;216591;216592;216593;244883;244884;244885;244886;311743;311744;311745;311746;325466;325467;325468;325469;325470;325471;325472;325473;325474;325475;325476;325477;325478;325479;325480;325481;325482;325483;325484;325485;325486;325487;325488;325489;325490;32549…	367;23543;83142;111683;111684;111685;111686;111687;111688;111689;111690;111691;111692;201806;201807;201808;201809;201810;201811;201812;201813;201814;201815;201816;228122;228123;228124;291001;291002;291003;303871;303872;303873;303874;303875;303876;303877;303878;303879;303880;303881;303882;303883;303884;303885;303886;303887;303888;303889;303890;303891;303892;303893;303894;303895;303896;319677;33163…	367;23543;83142;111683;201813;228123;291001;303886;319677;331634;354908;373889;381905;389745;393973;394791;483134;489189;511884;512226;533587;540846;569455;604008;610560;617347;646258;649581;677501;691481	628	844
441	sp|O15371|EIF3D_HUMAN	sp|O15371|EIF3D_HUMAN	Eukaryotic translation initiation factor 3 subunit D OS=Homo sapiens OX=9606 GN=EIF3D PE=1 SV=1	23	23	23	1	23	23	23	56.2	56.2	56.2	63.972	548	548	0	323.31	CEHDGVMTGANGEVSFINIK;DMPYQPFSK;DNSDFDLLTVSETANEPPQDEGNSFNSPR;FMTPVIQDNPSGWGPCAVPEQFR;GAVIATELK;GAVIATELKNNSYK;HCNGVDWR;HVILGTQQFKPNEFASQINLSVENAWGILR;IFHTVTTTDDPVIR;IFHTVTTTDDPVIRK;LGDDIDLIVR;NLAMEATYINHNFSQQCLR;NMLQFNLQILPK;RIFHTVTTTDDPVIR;SDWEVKEEMDFPQLMK;SVYSWDIVVQR;TLNEWDSR;TQGNVFATDAILATLMSCTR;VADWTGATYQDKR;WKLGDDIDLIVR;WTCCALLAGSEYLK;YLILKDPNK;YNFPNPNPFVEDDMDKNEIASVAYR		5719;8049;8149;14772;16196;16197;19958;21340;22412;22413;29633;38061;38476;43100;44393;48031;50110;50836;52085;57494;57712;58875;59092	True;True;True;True;True;True;True;True;True;True;True;True;True;True;True;True;True;True;True;True;True;True;True	6230;8775;8892;16143;16144;17704;17705;21794;23309;24460;24461;32351;42250;42721;42722;47750;49133;53131;55422;56246;57625;63575;63812;65075;65326	74723;74724;74725;74726;104398;104399;104400;104401;104402;104403;104404;105941;188500;188501;188502;188503;188504;188505;188506;188507;188508;188509;188510;188511;188512;188513;188514;188515;188516;207138;207139;207140;207141;207142;207143;207144;207145;207146;207147;207148;207149;207150;207151;207152;207153;207154;207155;255816;255817;255818;255819;255820;255821;255822;277999;278000;278001;2780…	69696;69697;97715;97716;97717;97718;97719;99210;175781;175782;175783;175784;175785;175786;175787;175788;175789;175790;175791;175792;175793;175794;175795;175796;175797;175798;193057;193058;193059;193060;193061;193062;193063;193064;193065;193066;193067;238344;238345;238346;238347;238348;259592;259593;259594;259595;259596;259597;259598;259599;259600;259601;259602;259603;259604;259605;259606;259607;2…	69696;97719;99210;175784;193058;193063;238344;259593;272674;272684;365023;472187;477324;530690;545058;589247;616353;624748;641152;712155;714569;729039;731752	629;630	5;114
442	sp|O15372|EIF3H_HUMAN	sp|O15372|EIF3H_HUMAN	Eukaryotic translation initiation factor 3 subunit H OS=Homo sapiens OX=9606 GN=EIF3H PE=1 SV=1	21	21	21	1	21	21	21	71.6	71.6	71.6	39.93	352	352	0	303.7	ALLDSQFSYQHAIEESVVLIYDPIK;ANITFEYMFEEVPIVIK;DFSPEALKK;EFTAQNLGK;EGTGSTATSSSSTAGAAGK;GEPPLPEEDLSK;HELLSLASSNHLGK;HVNIDHLHVGWYQSTYYGSFVTR;HYQEEGQGTEVVQGVLLGLVVEDR;KEGTGSTATSSSSTAGAAGK;LFKPPQPPAR;LFMAQALQEYNN;MDSLLIAGQINTYCQNIK;NLQLLMDR;NLQLLMDRVDEMSQDIVK;NSHLINVLMWELEK;NSHLINVLMWELEKK;QVQIDGLVVLK;SAVADKHELLSLASSNHLGK;TAQGSLSLK;VDEMSQDIVK		2917;3514;6895;10088;10390;16606;20061;21368;21491;26098;29359;29396;35707;38355;38356;38959;38960;42538;44090;48428;52569	True;True;True;True;True;True;True;True;True;True;True;True;True;True;True;True;True;True;True;True;True	3154;3844;7508;10987;11315;18149;21907;23340;23472;28517;32047;32088;32089;39064;39065;42573;42574;42575;43269;43270;43271;43272;47150;48806;53581;58151;58152	37806;37807;37808;37809;37810;37811;45306;45307;45308;45309;45310;45311;45312;89171;89172;89173;89174;89175;89176;89177;89178;89179;89180;89181;89182;89183;89184;89185;89186;89187;89188;89189;89190;89191;89192;129723;129724;129725;129726;129727;129728;129729;129730;129731;129732;133245;133246;133247;133248;133249;133250;133251;133252;133253;133254;133255;133256;133257;133258;133259;133260;133261;…	35201;35202;35203;35204;35205;42107;42108;42109;42110;42111;42112;42113;83465;83466;83467;83468;83469;83470;83471;83472;83473;83474;83475;83476;83477;83478;83479;83480;83481;83482;83483;83484;121533;121534;121535;121536;121537;121538;121539;121540;124779;124780;124781;124782;124783;124784;124785;124786;124787;124788;124789;124790;124791;124792;124793;124794;124795;124796;197673;197674;197675;1976…	35203;42109;83465;121540;124796;197681;239599;260057;261864;319833;361318;361715;440856;475444;475459;483231;483246;523118;541779;594403;648115	631;632;633;634;635	215;247;253;314;343
443	sp|O15379|HDAC3_HUMAN	sp|O15379|HDAC3_HUMAN	Histone deacetylase 3 OS=Homo sapiens OX=9606 GN=HDAC3 PE=1 SV=2	2	1	1	1	2	1	1	5.8	4	4	48.847	428	428	0.0027496	2.9282	SFNIPLLVLGGGGYTVR;VMTVSFHK		44793;55106	True;False	49571;60966;60967	589675;589676;589677;730838;730839;730840;730841;730842;730843;730844;730845;730846;730847;730848;730849;730850	549441;549442;549443;681398;681399;681400;681401;681402;681403;681404;681405;681406;681407;681408	549441;681399
444	sp|O15381|NVL_HUMAN	sp|O15381|NVL_HUMAN	Nuclear valosin-containing protein-like OS=Homo sapiens OX=9606 GN=NVL PE=1 SV=1	2	2	2	1	2	2	2	4	4	4	95.05	856	856	0.0013029	3.2645	ALGLVTPAGVLLAGPPGCGK;AVANESGLNFISVK		2809;4879	True;True	3043;5314	36191;36192;63310	33676;58977	33676;58977
445	sp|O15382|BCAT2_HUMAN	sp|O15382|BCAT2_HUMAN	Branched-chain-amino-acid aminotransferase, mitochondrial OS=Homo sapiens OX=9606 GN=BCAT2 PE=1 SV=2	7	7	7	1	7	7	7	20.4	20.4	20.4	44.287	392	392	0	18.56	AHEWMFPV;KPGPGEPLVFGK;LCLPSFDKLELLECIR;LFRPWLNMDR;LGGNYGPTVLVQQEALK;LGGNYGPTVLVQQEALKR;NLHIPTMENGPELILR		1971;27073;28378;29473;29757;29758;38195	True;True;True;True;True;True;True	2130;29582;30999;32179;32487;32488;42397;42398	24572;24573;356061;356062;356063;356064;356065;356066;356067;356068;356069;356070;375432;375433;375434;375435;375436;375437;375438;375439;375440;388773;388774;388775;388776;388777;388778;388779;388780;388781;388782;388783;388784;393715;393716;393717;393718;393719;393720;393721;507811;507812;507813;507814;507815;507816;507817;507818;507819;507820;507821;507822;507823	22927;22928;332118;332119;332120;332121;332122;332123;332124;332125;332126;350134;350135;350136;350137;350138;350139;362604;362605;362606;362607;362608;362609;362610;362611;362612;362613;367497;367498;367499;367500;367501;367502;367503;473731;473732;473733;473734;473735;473736;473737;473738;473739;473740;473741;473742	22928;332118;350134;362607;367497;367500;473735	636	362
446	sp|O15397|IPO8_HUMAN	sp|O15397|IPO8_HUMAN	Importin-8 OS=Homo sapiens OX=9606 GN=IPO8 PE=1 SV=2	12	11	11	1	12	11	11	13.5	12.5	12.5	119.94	1037	1037	0	28.972	DGALHVIGSLAEILLK;DGALHVIGSLAEILLKK;ETENDDVTNVIQK;IAAENELNQSYK;IIDLVLQK;IINFAPSLLR;IIVSDHVEFPVR;LLEVIILQCK;MKFDIFEDYASPTTAAQTLLYTAAK;TALQEVYTLAEHR;TYAVGIQQVLLK;WALHIVAR		6943;6944;12424;21522;22999;23144;23278;31293;36186;48387;51875;57252	True;True;True;True;True;True;True;False;True;True;True;True	7563;7564;13543;23503;25091;25250;25391;34153;39800;53530;57386;63319	89782;89783;89784;89785;89786;89787;89788;89789;89790;89791;89792;89793;157638;157639;157640;157641;157642;280838;300064;300065;300066;300067;300068;300069;300070;300071;300072;300073;300074;302427;302428;302429;302430;302431;302432;302433;302434;302435;302436;302437;302438;302439;302440;302441;302442;302443;302444;302445;304622;304623;304624;304625;304626;304627;304628;304629;304630;414816;41481…	84028;84029;84030;84031;84032;84033;84034;84035;84036;84037;147248;147249;147250;262294;280037;280038;280039;280040;280041;280042;280043;280044;280045;282278;282279;282280;282281;282282;282283;282284;282285;282286;282287;282288;282289;282290;282291;282292;282293;282294;282295;282296;284424;284425;284426;284427;284428;284429;284430;284431;387175;387176;387177;387178;387179;387180;387181;387182;387…	84030;84035;147249;262294;280042;282295;284431;387192;447706;593832;638266;709143
447	sp|O15400|STX7_HUMAN	sp|O15400|STX7_HUMAN	Syntaxin-7 OS=Homo sapiens OX=9606 GN=STX7 PE=1 SV=4	8	8	8	1	8	8	8	39.1	39.1	39.1	29.815	261	261	0	222.63	EFGSLPTTPSEQR;ITQCSVEIQR;LVAEFTTSLTNFQK;QLEADIMDINEIFK;QQYTNQLAK;SYTPGVGGDPAQLAQR;TLNQLGTPQDSPELR;VSGSFPEDSSK		9997;25231;34600;41311;42112;48206;50122;55984	True;True;True;True;True;True;True;True	10890;27584;37769;45821;46696;53325;55435;61942	128678;128679;128680;128681;128682;128683;128684;128685;128686;128687;128688;128689;128690;128691;128692;128693;330872;330873;330874;330875;330876;330877;330878;330879;330880;330881;330882;330883;330884;330885;330886;456901;456902;456903;456904;456905;456906;456907;456908;456909;456910;456911;456912;456913;456914;546773;546774;546775;546776;546777;546778;546779;555877;555878;555879;555880;634678;…	120579;120580;120581;120582;120583;120584;120585;120586;120587;120588;120589;120590;120591;120592;120593;120594;308871;308872;308873;308874;308875;308876;308877;308878;308879;308880;308881;308882;308883;308884;308885;426487;426488;426489;426490;426491;426492;426493;426494;426495;426496;426497;426498;426499;509690;509691;509692;509693;509694;509695;509696;518071;518072;518073;591446;616491;616492;…	120582;308884;426487;509690;518072;591446;616496;692812
448	sp|O15427|MOT4_HUMAN	sp|O15427|MOT4_HUMAN	Monocarboxylate transporter 4 OS=Homo sapiens OX=9606 GN=SLC16A3 PE=1 SV=1	10	10	10	1	10	10	10	25.6	25.6	25.6	49.469	465	465	0	58.249	DLGVPDTK;EPQPEVAAAEEEK;EVEHFLK;GGAVVDEGPTGVK;LHKPPADSGVDLR;LLDLSVFR;PAAGFVAGLGK;PLVVTAQPGSGPPR;PLVVTAQPGSGPPRPSR;RPMANGLAAAGSPVFLCALSPLGQLLQDR		7720;11868;12688;16953;30184;31100;39597;39937;39938;43523	True;True;True;True;True;True;True;True;True;True	8396;12937;13831;18520;32961;33949;43973;44325;44326;48198;48199	99942;99943;99944;99945;99946;99947;99948;99949;99950;151252;151253;151254;151255;151256;151257;151258;151259;151260;151261;151262;151263;151264;151265;151266;151267;161222;161223;161224;161225;161226;161227;161228;161229;161230;161231;216620;216621;216622;216623;216624;216625;216626;216627;216628;216629;216630;216631;216632;216633;216634;216635;216636;216637;216638;216639;216640;216641;216642;21…	93498;93499;93500;93501;93502;93503;141325;141326;141327;141328;141329;141330;141331;141332;141333;141334;141335;141336;141337;141338;141339;150580;150581;150582;150583;150584;150585;150586;150587;150588;150589;201839;201840;201841;201842;201843;201844;201845;201846;201847;201848;201849;201850;201851;201852;201853;201854;201855;201856;201857;201858;201859;201860;201861;201862;201863;201864;201865…	93498;141326;150585;201844;373088;384835;491002;494282;494288;535456	637	147
449	sp|O15439|MRP4_HUMAN	sp|O15439|MRP4_HUMAN	ATP-binding cassette sub-family C member 4 OS=Homo sapiens OX=9606 GN=ABCC4 PE=1 SV=3	12	12	12	1	12	12	12	9.5	9.5	9.5	149.52	1325	1325	0	27.988	AEAAALTETAK;APVLFFDR;APVLFFDRNPIGR;HLTALIK;ILTTEIGLHDLR;ILTTEIGLHDLRK;IQTFLLLDEISQR;SFSNLITNLR;SPVFSHLSSSLQGLWTIR;SSLISALFR;SSLLSAVLGELAPSHGLVSVHGR;VIQPIFLGK		985;3840;3841;20750;23906;23907;24623;44825;46788;47251;47258;53974	True;True;True;True;True;True;True;True;True;True;True;True	1064;4197;4198;22653;26078;26079;26901;49604;51779;52279;52287;59697	11425;11426;11427;11428;11429;11430;11431;11432;49614;49615;49616;49617;49618;49619;49620;49621;49622;49623;49624;49625;49626;49627;49628;49629;49630;267400;267401;313343;313344;313345;313346;313347;313348;313349;313350;313351;322690;590039;590040;590041;616527;616528;616529;616530;622452;622453;622454;622455;622456;622457;622458;622459;622460;622461;622462;622463;622530;622531;622532;622533;6225…	10572;10573;10574;10575;10576;10577;10578;46134;46135;46136;46137;46138;46139;46140;46141;46142;46143;46144;46145;46146;249170;249171;292450;292451;292452;292453;292454;292455;292456;292457;292458;301276;549783;549784;549785;574550;574551;574552;580014;580015;580016;580017;580018;580019;580020;580021;580022;580023;580084;580085;580086;580087;580088;580089;580090;666783;666784	10576;46137;46145;249170;292455;292458;301276;549785;574551;580019;580085;666783
451	sp|O15460|P4HA2_HUMAN	sp|O15460|P4HA2_HUMAN	Prolyl 4-hydroxylase subunit alpha-2 OS=Homo sapiens OX=9606 GN=P4HA2 PE=1 SV=1	18	18	18	1	18	18	18	40.6	40.6	40.6	60.901	535	535	0	323.31	APQLLIAPFKEEDEWDSPHIVR;EYILVEEAK;GQEFLRPCGSTEVD;GTAVFWYNLLR;HAACPVLVGCK;KGTAVFWYNLLR;LLSLDPSHER;MQHITGLTVK;RMQHITGLTVK;SAADAEGYLAHPVNAYK;SAYNEGDYYHTVLWMEQVLK;SQVLDYLSYAVFQLGDLHR;SSWLEEDDDPVVAR;TAELLQVANYGVGGQYEPHFDFSR;TGVLTVASYR;YFEQLLEEER;YFEQLLEEEREK;YYDVMSDEEIER		3779;13055;18648;19157;19842;26397;31895;36608;43397;43839;44124;46998;47414;48282;49346;58235;58236;59758	True;True;True;True;True;True;True;True;True;True;True;True;True;True;True;True;True;True	4128;14238;20379;20927;21673;28834;34795;40469;40470;48062;48535;48847;52006;52454;53411;54581;64380;64381;66038	48718;48719;48720;48721;48722;48723;48724;48725;48726;48727;48728;48729;48730;48731;48732;48733;48734;48735;48736;48737;48738;48739;48740;48741;48742;48743;48744;48745;165811;165812;165813;165814;165815;239098;239099;239100;239101;245151;245152;245153;245154;245155;245156;245157;245158;245159;245160;245161;245162;245163;254634;254635;254636;254637;254638;254639;254640;254641;346316;346317;346318;…	45302;45303;45304;45305;45306;45307;45308;45309;45310;45311;45312;45313;45314;45315;45316;45317;45318;45319;45320;45321;45322;45323;45324;45325;45326;45327;45328;45329;45330;45331;154812;154813;154814;154815;154816;222822;222823;222824;228361;228362;228363;228364;228365;228366;228367;228368;228369;228370;228371;228372;228373;237236;237237;237238;237239;237240;237241;237242;237243;323269;323270;32…	45316;154813;222822;228364;237236;323285;394774;453817;533347;539059;542126;576910;581716;592466;605894;720702;720711;739422	638	402
452	sp|O15484|CAN5_HUMAN	sp|O15484|CAN5_HUMAN	Calpain-5 OS=Homo sapiens OX=9606 GN=CAPN5 PE=1 SV=2	2	2	2	1	2	2	2	4.5	4.5	4.5	73.168	640	640	0	7.8038	LGHGLLAFFK;YVIIPTTFEPGHTGEFLLR		29782;59652	True;True	32513;65924	394025;394026;394027;792143;792144;792145;792146;792147;792148	367804;367805;367806;738403;738404;738405	367806;738403
453	sp|O15498|YKT6_HUMAN	sp|O15498|YKT6_HUMAN	Synaptobrevin homolog YKT6 OS=Homo sapiens OX=9606 GN=YKT6 PE=1 SV=1	14	14	14	1	14	14	14	75.8	75.8	75.8	22.417	198	198	0	66.069	AAYDVSSFSFFQR;ASVKEQDYLCHVYVR;EQDYLCHVYVR;GEKLDDLVSK;IDWPVGSPATIHYPALDGHLSR;IILHNTMESLLER;LYSLSVLYK;LYSLSVLYKGEAK;NDSLAGVVIADNEYPSR;QVDRIDWPVGSPATIHYPALDGHLSR;SEVLGTQSK;SSVQEFMTFTSQLIVER;VAFTLLEK;VQAELDETK		646;4517;11916;16555;22087;23110;35447;35448;37323;42428;44646;47407;52147;55594	True;True;True;True;True;True;True;True;True;True;True;True;True;True	691;4925;12988;18090;24114;25213;25214;38679;38680;41454;47032;49410;52447;57692;61522	7382;7383;7384;7385;7386;7387;7388;58972;58973;151806;151807;151808;151809;151810;151811;151812;151813;151814;151815;151816;151817;151818;151819;151820;151821;151822;151823;151824;151825;151826;151827;151828;151829;151830;211561;211562;211563;211564;211565;211566;211567;211568;211569;211570;211571;211572;211573;211574;211575;211576;211577;211578;211579;211580;211581;211582;211583;211584;211585;21…	6862;6863;6864;6865;6866;54963;54964;141835;141836;141837;141838;141839;141840;141841;141842;141843;141844;141845;141846;141847;141848;141849;141850;141851;141852;141853;141854;141855;141856;141857;197108;197109;197110;197111;197112;197113;197114;197115;197116;197117;197118;197119;197120;197121;197122;197123;197124;197125;197126;197127;197128;197129;197130;197131;197132;197133;197134;197135;19713…	6865;54963;141838;197132;268919;281626;437024;437031;464109;521777;548080;581615;641939;688290	639;640	40;157
454	sp|O15511|ARPC5_HUMAN	sp|O15511|ARPC5_HUMAN	Actin-related protein 2/3 complex subunit 5 OS=Homo sapiens OX=9606 GN=ARPC5 PE=1 SV=3	8	8	7	1	8	8	7	49.7	49.7	49.7	16.32	151	151	0	98.803	AGSIVLK;ALAAGGVGSIVR;AVQSLDKNGVDLLMK;DRAGSIVLK;GFESPSDNSSAMLLQWHEK;NGVDLLMK;QGNMTAALQAALK;QGNMTAALQAALKNPPINTK		1863;2503;5238;8387;16721;37694;40869;40870	True;True;True;True;True;True;True;True	2014;2717;5711;5712;9149;18268;18269;41849;45342;45343;45344	23056;23057;32129;32130;32131;32132;32133;32134;32135;32136;32137;32138;32139;32140;32141;32142;32143;32144;32145;32146;32147;32148;32149;68277;68278;68279;68280;68281;68282;68283;68284;68285;68286;68287;68288;68289;68290;68291;68292;68293;68294;68295;68296;68297;68298;68299;68300;68301;68302;68303;68304;68305;68306;68307;68308;68309;68310;68311;68312;68313;68314;108703;108704;108705;108706;10870…	21511;21512;21513;29933;29934;29935;29936;29937;29938;29939;29940;29941;29942;29943;29944;29945;29946;29947;29948;29949;29950;29951;29952;29953;63659;63660;63661;63662;63663;63664;63665;63666;63667;63668;63669;63670;63671;63672;63673;63674;63675;63676;63677;63678;63679;63680;63681;63682;63683;63684;63685;63686;63687;63688;63689;63690;63691;63692;63693;101831;101832;101833;101834;101835;101836;101…	21512;29934;63662;101831;198845;468120;504590;504595	641;642;643	51;107;124
455	sp|O15523|DDX3Y_HUMAN	sp|O15523|DDX3Y_HUMAN	ATP-dependent RNA helicase DDX3Y OS=Homo sapiens OX=9606 GN=DDX3Y PE=1 SV=2	30	4	4	1	30	4	4	49.7	9.1	9.1	73.153	660	660	0	31.58	DFLDEYIFLAVGR;DLLDLLVEAK;DLMACAQTGSGK;DREEALHQFR;ELAVQIYEEAR;ELAVQIYEEARK;FSGGFGAR;GADSLEDFLYHEGYACTSIHGDR;GCHLLVATPGR;HAIPIIK;HTMMFSATFPK;HVINFDLPSDIEEYVHR;IVEQDTMPPK;KGADSLEDFLYHEGYACTSIHGDR;KQYPISLVLAPTR;LEQELFSGGNTGINFEK;MLDMGFEPQIR;QEVPSWLENMAYEHHYK;QSSGSSSSGFGASR;QYPISLVLAPTR;SPILVATAVAAR;TAAFLLPILSQIYTDGPGEALK;VGNLGLATSFFNEK;VGSTSENITQK;VRPCVVYGGADIGQQIR;VVWVEDLDKR;YIPPHLR;YLVLDEADR;YLVLDE…		6842;7790;7842;8399;10992;10993;15244;15955;16243;19884;21251;21342;25390;26268;27266;29091;36250;40660;42246;42701;46652;48235;53465;53526;55857;56984;58661;59005;59006;59591	False;False;False;False;False;False;False;False;False;False;False;False;False;False;False;False;False;False;True;False;False;True;True;False;False;True;False;False;False;False	7446;8471;8525;8526;9161;11964;11965;16654;17440;17756;21717;23213;23214;23311;27758;28695;29791;31759;39900;39901;39902;45114;45115;46838;47325;51625;53358;59127;59193;61804;63034;64848;65216;65217;65218;65861	88588;100734;100735;100736;100737;100738;100739;100740;100741;100742;100743;100744;100745;100746;100747;100748;100749;100750;100751;100752;100753;100754;100755;100756;101400;101401;101402;101403;101404;101405;101406;101407;101408;101409;101410;101411;101412;101413;101414;101415;101416;108850;108851;108852;108853;108854;108855;108856;108857;108858;108859;108860;108861;108862;108863;108864;108865;1…	82925;94227;94228;94229;94230;94231;94232;94233;94234;94235;94236;94237;94238;94239;94240;94241;94242;94243;94244;94245;94246;94247;94248;94249;94250;94820;94821;94822;94823;94824;94825;94826;94827;94828;94829;94830;94831;94832;94833;101958;101959;101960;101961;101962;101963;101964;101965;101966;101967;101968;101969;101970;101971;101972;101973;101974;101975;101976;101977;101978;101979;101980;1019…	82925;94245;94820;101975;132118;132128;181048;189793;193597;237719;258306;259647;310783;321889;334977;358286;448709;502005;519398;524932;573053;592035;659413;660005;691255;706160;726427;730706;730708;737545	501;502;503;504;505;506;507	219;350;353;368;377;378;572
456	sp|O15530|PDPK1_HUMAN;sp|Q6A1A2|PDPK2_HUMAN	sp|O15530|PDPK1_HUMAN;sp|Q6A1A2|PDPK2_HUMAN	3-phosphoinositide-dependent protein kinase 1 OS=Homo sapiens OX=9606 GN=PDPK1 PE=1 SV=1; Putative 3-phosphoinositide-dependent protein kinase 2 OS=Homo sapiens OX=9606 GN=PDPK2P PE=5 SV=1	2;1	2;1	2;1	2	2	2	2	6.1	6.1	6.1	63.151	556	556;396	0.00024734	5.7184	FYTAEIVSALEYLHGK;QLLLTEGPHLYYVDPVNK		15878;41489	True;True	17353;46008	202660;202661;202662;202663;202664;202665;202666;548729;548730;548731;548732	188871;188872;188873;188874;188875;188876;511502	188874;511502
457	sp|O15533|TPSN_HUMAN	sp|O15533|TPSN_HUMAN	Tapasin OS=Homo sapiens OX=9606 GN=TAPBP PE=1 SV=2	6	6	6	1	6	6	6	18.3	18.3	18.3	47.57	448	448	0	31.388	GAPAPHCEMSR;IHHPSLPASGR;PQPEPQQEPVLITMATVVLTVLTHTPAPR;RPGALLLR;VSLMPATLAR;WASGLTPAQNCPR		16110;22864;39987;43468;56047;57266	True;True;True;True;True;True	17610;24946;44383;48136;62009;62010;63335	205918;205919;205920;205921;205922;205923;205924;205925;205926;205927;205928;205929;298163;298164;298165;298166;298167;298168;298169;298170;530633;530634;530635;573760;744367;744368;744369;744370;744371;744372;744373;744374;744375;744376;744377;744378;744379;744380;760985;760986;760987;760988;760989;760990;760991;760992;760993;760994;760995;760996;760997;760998;760999;761000;761001	191929;191930;191931;191932;191933;191934;191935;191936;191937;191938;278281;278282;278283;278284;278285;278286;278287;494861;494862;534773;693992;693993;693994;693995;693996;693997;693998;693999;694000;694001;694002;694003;694004;694005;709325;709326;709327;709328;709329;709330;709331;709332;709333;709334;709335;709336;709337	191931;278286;494861;534773;694002;709330
458	sp|O43143|DHX15_HUMAN	sp|O43143|DHX15_HUMAN	ATP-dependent RNA helicase DHX15 OS=Homo sapiens OX=9606 GN=DHX15 PE=1 SV=2	39	39	38	1	39	39	38	52.2	52.2	51.1	90.932	795	795	0	323.31	ALVTGYFMQVAHLER;ASTNAMLISAGLPPLK;DNQVVQLHPSTVLDHKPEWVLYNEFVLTTK;DYYINIR;EAMNDPLLER;EVDDLGPEVGDIK;FAHIDGDHLTLLNVYHAFK;FQIYFDNCPLLTIPGR;FTDILVR;HQSFVLVGETGSGK;HRLDLGEDYPSGK;IFEPPPPK;IFEPPPPKK;IIPLYSTLPPQQQQR;IMDRFNLPR;IRVESLLVTAISK;KALVTGYFMQVAHLER;KLGIDDLVHFDFMDPPAPETLMR;LGIDDLVHFDFMDPPAPETLMR;LQLPVWEYK;LQLPVWEYKDR;QNHESVQWCYDNFINYR;RLQLPVWEYK;SLMSADNVR;SNLGSVVLQLK;SNLGSVVLQLKK;STDFTSR;TCTDIKPEWLV…		3285;4494;8146;9114;9395;12648;13219;15040;15439;21039;21066;22381;22382;23173;23985;24727;25891;26736;29789;33250;33251;41798;43333;46063;46466;46467;47445;48569;48863;49207;49433;49854;51380;52036;52972;54029;58493;59061;59755	True;True;True;True;True;True;True;True;True;True;True;True;True;True;True;True;True;True;True;True;True;True;True;True;True;True;True;True;True;True;True;True;True;True;True;True;True;True;True	3559;3560;4900;4901;8889;9932;10238;10239;13786;14416;16428;16874;22981;23009;24426;24427;25282;26171;27014;28292;29204;29205;32522;32523;32524;36307;36308;46363;47990;50956;50957;51425;51426;52489;53733;54058;54059;54432;54676;55137;55138;56850;56851;57564;57565;58583;59756;59757;64665;65293;66035	42760;42761;42762;42763;42764;42765;42766;42767;42768;42769;42770;42771;42772;42773;42774;42775;42776;42777;42778;42779;42780;42781;42782;58786;58787;58788;58789;58790;58791;58792;58793;58794;58795;58796;58797;58798;58799;58800;58801;105922;105923;105924;105925;105926;105927;105928;105929;105930;105931;105932;105933;105934;105935;105936;105937;117801;117802;117803;117804;121354;121355;121356;1213…	39822;39823;39824;39825;39826;39827;39828;39829;39830;39831;39832;39833;39834;39835;39836;39837;39838;39839;39840;39841;39842;54794;54795;54796;54797;54798;54799;54800;54801;54802;54803;54804;54805;54806;54807;54808;99193;99194;99195;99196;99197;99198;99199;99200;99201;99202;99203;99204;99205;99206;99207;110343;113676;113677;113678;113679;113680;113681;113682;113683;113684;113685;150012;150013;15…	39831;54807;99203;110343;113679;150021;156820;178865;183519;253949;254243;272254;272260;282623;293414;302609;316944;328261;367924;410730;410745;514745;532646;566184;570756;570766;582061;596166;599695;603997;607742;613420;631677;640397;652656;667633;723842;731427;739387	644;645;646;647;648;649;650;651;652;653;654	68;178;199;246;273;291;494;528;537;655;699
459	sp|O43150|ASAP2_HUMAN	sp|O43150|ASAP2_HUMAN	Arf-GAP with SH3 domain, ANK repeat and PH domain-containing protein 2 OS=Homo sapiens OX=9606 GN=ASAP2 PE=1 SV=3	4	2	2	1	4	2	2	4.9	3.8	3.8	111.65	1006	1006	0	7.4285	AVESLKPSIETLSTDLHTIK;GVDLLQNLIK;KGVDLLQNLIK;TSLHIVDFLVQNSGNLDK		4981;19377;26412;51107	True;False;False;True	5429;21162;28852;56536	64917;64918;248033;248034;248035;248036;248037;248038;248039;248040;248041;248042;248043;248044;248045;248046;248047;248048;248049;248050;248051;248052;346662;346663;346664;346665;346666;346667;346668;346669;673563;673564	60498;231028;231029;231030;231031;231032;231033;231034;231035;231036;231037;231038;231039;231040;231041;231042;231043;231044;231045;231046;323593;323594;323595;323596;323597;323598;323599;323600;627833	60498;231029;323598;627833
460	sp|O43155|FLRT2_HUMAN	sp|O43155|FLRT2_HUMAN	Leucine-rich repeat transmembrane protein FLRT2 OS=Homo sapiens OX=9606 GN=FLRT2 PE=1 SV=1	3	3	3	1	3	3	3	7.6	7.6	7.6	74.048	660	660	0.00024213	5.2103	ICLVPLDAFNYR;LYLQDNQINHIPLTAFSNLR;NHLSSVPVGLPVDLQELR		21864;35367;37739	True;True;True	23875;38593;41900	285369;285370;285371;285372;285373;467224;467225;467226;502230;502231;502232	266475;266476;266477;266478;436180;468644;468645	266475;436180;468644
461	sp|O43156|TTI1_HUMAN	sp|O43156|TTI1_HUMAN	TELO2-interacting protein 1 homolog OS=Homo sapiens OX=9606 GN=TTI1 PE=1 SV=3	2	2	2	1	2	2	2	3	3	3	122.07	1089	1089	0	10.119	ALADILSESLHSLATSLPR;LAGSLVTQAPISAR		2518;27918	True;True	2733;30496	32307;32308;32309;32310;32311;32312;32313;32314;369119;369120	30103;30104;30105;30106;30107;30108;30109;30110;30111;344273;344274	30105;344273
462	sp|O43164|PJA2_HUMAN	sp|O43164|PJA2_HUMAN	E3 ubiquitin-protein ligase Praja-2 OS=Homo sapiens OX=9606 GN=PJA2 PE=1 SV=4	2	2	2	1	2	2	2	4.2	4.2	4.2	78.213	708	708	0.00023585	4.6144	ETENNQMTSESGATAGR;NHGSSPEQVVRPK		12425;37718	True;True	13544;41876	157643;501991;501992;501993;501994	147251;468422;468423;468424;468425	147251;468424	655	394
463	sp|O43169|CYB5B_HUMAN	sp|O43169|CYB5B_HUMAN	Cytochrome b5 type B OS=Homo sapiens OX=9606 GN=CYB5B PE=1 SV=3	6	6	6	1	6	6	6	62	62	62	16.694	150	150	0	42.471	ELWLVIHGR;FLNEHPGGEEVLLEQAGVDASESFEDVGHSSDAR;GQEVETSVTYYR;NSLKELWLVIHGR;QYYIGDIHPSDLKPESGSK;SGSMATAEASGSDGK		11534;14552;18657;38991;42730;45098	True;True;True;True;True;True	12539;15868;20389;43306;47355;49900;49901	147461;147462;147463;147464;147465;147466;147467;147468;147469;147470;147471;147472;147473;147474;147475;147476;147477;147478;147479;147480;147481;147482;147483;147484;147485;147486;147487;147488;147489;147490;147491;147492;147493;147494;147495;147496;147497;147498;147499;147500;185628;185629;239252;239253;239254;239255;239256;239257;239258;239259;239260;239261;239262;239263;239264;239265;239266;…	137812;137813;137814;137815;137816;137817;137818;137819;137820;137821;137822;137823;137824;137825;137826;137827;137828;137829;137830;137831;137832;137833;137834;137835;137836;137837;137838;137839;137840;137841;137842;137843;137844;137845;137846;137847;137848;137849;137850;173129;173130;222975;222976;222977;222978;222979;222980;222981;222982;222983;222984;222985;222986;222987;222988;222989;222990;…	137829;173130;222983;483585;525208;553181	656	5
464	sp|O43172|PRP4_HUMAN	sp|O43172|PRP4_HUMAN	U4/U6 small nuclear ribonucleoprotein Prp4 OS=Homo sapiens OX=9606 GN=PRPF4 PE=1 SV=2	7	7	7	1	7	7	7	18.4	18.4	18.4	58.449	522	522	0	19.604	ALGEPITLFGEGPAER;FEPIHGNFLLTGAYDNTAK;GHNTNVGAIVFHPK;IWTHPGWSPLK;LWIANYSLPR;LWSVPDCNLLHTLR;NILSVVGTDALK		2787;13604;17247;25665;35194;35223;37895	True;True;True;True;True;True;True	3021;14831;18839;28049;38412;38442;42067	35949;35950;173246;173247;173248;173249;173250;220285;220286;220287;220288;220289;220290;220291;220292;220293;336329;336330;336331;465599;465600;465601;465602;465603;465604;465605;465606;465826;465827;465828;504127	33456;33457;161698;161699;205210;205211;205212;205213;205214;205215;205216;205217;314026;314027;314028;434713;434714;434715;434716;434717;434718;434719;434913;434914;434915;470370	33457;161698;205213;314027;434717;434914;470370
465	sp|O43175|SERA_HUMAN	sp|O43175|SERA_HUMAN	D-3-phosphoglycerate dehydrogenase OS=Homo sapiens OX=9606 GN=PHGDH PE=1 SV=4	25	25	25	1	25	25	25	59.1	59.1	59.1	56.65	533	533	0	323.31	AFANLRK;AGTGVDNVDLEAATR;AGTGVDNVDLEAATRK;ALQSGQCAGAALDVFTEEPPRDR;ALVDHENVISCPHLGASTK;CGEEIAVQFVDMVK;DLPLLLFR;EELIAELQDCEGLIVR;GGIVDEGALLR;GTIQVITQGTSLK;ILQDGGLQVVEK;KGILVMNTPNGNSLSAAELTCGMIMCLAR;KILQDGGLQVVEK;MQSFGMK;NAGNCLSPAVIVGLLK;QADVNLVNAK;QHVTEAFQFHF;QIPQATASMK;QNLSKEELIAELQDCEGLIVR;SLTGVVNAQALTSAFSPHTKPWIGLAEALGTLMR;TLGILGLGR;TQTSDPAMLPTMIGLLAEAGVR;VLISDSLDPCCR;VLISDSLDPCCRK;VTADVINAAEK		1344;1884;1885;3131;3248;5800;7871;9871;17035;19233;23804;26333;26545;36641;37077;40180;40990;41123;41827;46230;49971;50936;54553;54554;56190	True;True;True;True;True;True;True;True;True;True;True;True;True;True;True;True;True;True;True;True;True;True;True;True;True	1450;2036;2037;3389;3519;6316;6317;8564;10754;18609;21005;25970;28766;28998;40518;41182;44593;45476;45621;45622;46393;51134;51135;55259;56352;56353;60322;60323;62165	15494;15495;15496;15497;15498;15499;15500;15501;15502;23198;23199;23200;23201;23202;23203;23204;23205;23206;23207;23208;23209;23210;23211;23212;23213;23214;23215;40304;40305;40306;40307;40308;40309;40310;40311;40312;40313;40314;40315;40316;40317;40318;42223;42224;42225;42226;42227;42228;42229;42230;42231;42232;42233;42234;42235;42236;42237;42238;42239;42240;42241;42242;42243;42244;42245;42246;422…	14363;14364;14365;14366;14367;14368;14369;21635;21636;21637;21638;21639;21640;21641;21642;21643;21644;21645;21646;21647;21648;37489;37490;37491;37492;37493;37494;37495;37496;37497;37498;37499;37500;37501;37502;39329;39330;39331;39332;39333;39334;39335;39336;39337;39338;39339;39340;39341;39342;39343;39344;39345;39346;39347;39348;39349;39350;39351;39352;39353;39354;39355;39356;39357;39358;39359;393…	14364;21642;21648;37496;39331;70421;95307;119519;202752;229112;291436;322664;325479;454314;460868;496918;505965;507492;515002;567946;614689;625531;674402;674418;695445	657;658;659	128;343;477
466	sp|O43181|NDUS4_HUMAN	sp|O43181|NDUS4_HUMAN	NADH dehydrogenase [ubiquinone] iron-sulfur protein 4, mitochondrial OS=Homo sapiens OX=9606 GN=NDUFS4 PE=1 SV=1	2	2	2	1	2	2	2	14.9	14.9	14.9	20.108	175	175	0.00024038	5.0635	LDITTLTGVPEEHIK;SYGANFSWNKR		28581;48126	True;True	31216;53236	378403;378404;378405;378406;378407;378408;378409;378410;378411;378412;378413;378414;633627;633628;633629;633630;633631;633632;633633;633634;633635;633636;633637;633638;633639;633640;633641;633642;633643;633644;633645	353174;353175;353176;353177;353178;353179;353180;353181;353182;353183;590445;590446;590447;590448;590449;590450;590451;590452;590453;590454;590455;590456;590457;590458;590459	353176;590453
467	sp|O43196|MSH5_HUMAN	sp|O43196|MSH5_HUMAN	MutS protein homolog 5 OS=Homo sapiens OX=9606 GN=MSH5 PE=1 SV=1	2	2	2	1	2	2	2	2.3	2.3	2.3	92.874	834	834	0.0098348	2.0788	ALGGLLK;VKVITGPNSSGK		2792;54163	True;True	3026;59909	36003;36004;36005;36006;36007;36008;36009;36010;718143;718144;718145;718146;718147;718148;718149;718150;718151;718152;718153;718154;718155;718156;718157;718158;718159;718160;718161;718162;718163;718164;718165;718166;718167;718168;718169;718170;718171;718172	33512;33513;33514;33515;669596;669597;669598;669599;669600;669601;669602;669603;669604;669605;669606;669607;669608;669609;669610;669611;669612;669613;669614;669615;669616;669617	33512;669600
468	sp|O43237|DC1L2_HUMAN	sp|O43237|DC1L2_HUMAN	Cytoplasmic dynein 1 light intermediate chain 2 OS=Homo sapiens OX=9606 GN=DYNC1LI2 PE=1 SV=1	17	17	16	1	17	17	16	47.2	47.2	44.5	54.099	492	492	0	323.31	CNVWILDGDLYHK;DAVFIPAGWDNEK;DAVFIPAGWDNEKK;FCLQYGAALIYTSVKEEK;GGPASVPSSSPGTSVK;GLEYLYLSVHDEDRDDHTR;GPLTSGSDEENVALPLGDNVLTHNLGIPVLVVCTK;KPDSMVTNSSTENEA;KTGSPGSPGAGGVQSTAK;LVHDKELAAEDEQVFLMK;NILVFGEDGSGK;NLDLLYK;NNAASEGVLASFFNSLLSK;RGPLTSGSDEENVALPLGDNVLTHNLGIPVLVVCTK;TGSPGSPGAGGVQSTAK;TVLSNVQEELDR;TYGFHFTTPALVVEK		6078;6576;6577;13367;17069;17799;18504;27043;27367;34779;37897;38101;38505;43041;49309;51674;51914	True;True;True;True;True;True;True;True;True;True;True;True;True;True;True;True;True	6623;7159;7160;14572;18646;19427;20220;29548;29549;29901;37960;42069;42297;42769;47687;54539;57167;57425	78697;78698;78699;78700;78701;78702;78703;78704;78705;78706;78707;78708;78709;78710;78711;78712;78713;78714;78715;85167;85168;85169;85170;85171;85172;85173;85174;85175;170351;170352;170353;170354;170355;217946;217947;217948;217949;217950;217951;217952;217953;217954;227582;227583;227584;227585;227586;227587;227588;227589;227590;227591;227592;237249;237250;237251;237252;237253;237254;237255;237256;…	73365;73366;73367;73368;73369;73370;73371;73372;73373;73374;73375;73376;73377;73378;73379;73380;73381;79682;79683;79684;79685;79686;79687;79688;79689;79690;159036;159037;159038;159039;203060;203061;203062;203063;203064;203065;203066;203067;203068;211992;211993;211994;211995;211996;211997;211998;211999;212000;221098;221099;221100;221101;221102;221103;221104;221105;221106;221107;221108;221109;22111…	73368;79682;79684;159037;203061;211995;221107;331750;336341;428725;470386;472714;477993;528640;605082;635228;638899	660	482
469	sp|O43242|PSMD3_HUMAN	sp|O43242|PSMD3_HUMAN	26S proteasome non-ATPase regulatory subunit 3 OS=Homo sapiens OX=9606 GN=PSMD3 PE=1 SV=2	30	30	30	1	30	30	30	53	53	53	60.977	534	534	0	193.71	AIQLEYSEAR;AIQLEYSEARR;AIRDGVIEASINHEK;ALDLVAAK;APQHTAVGFK;AVQGFFTSNNATR;DFLLPFLEEPMDTEADLQFRPR;DGVIEASINHEK;DLESAEER;DLESAEERR;ELDTVTLEDIKEHVK;EMIDIYSTR;EMIDIYSTREPQLAFHQR;EPQLAFHQR;EQQDLEFAK;FNQVLDQFGEK;FQADGTYTLIIR;HDADGQATLLNLLLR;ISDDLMQK;ISFCLDIHNMSVK;ISLADIAQK;LNHYVLYK;LQLDSPEDAEFIVAK;MISLSYSR;NYLHYSLYDQAEK;RALDLVAAK;RLNHYVLYK;SLMPYFLLTQAVR;SVFPEQANNNEWAR;VYEFLDKLDVVR		2312;2313;2322;2634;3778;5224;6853;7108;7667;7668;11027;11591;11592;11867;12028;14858;14980;19969;24761;24799;24868;32337;33218;36148;39551;42763;43300;46062;47791;57092	True;True;True;True;True;True;True;True;True;True;True;True;True;True;True;True;True;True;True;True;True;True;True;True;True;True;True;True;True;True	2508;2509;2518;2856;4127;5694;7458;7459;7745;8341;8342;12000;12614;12615;12616;12936;13112;16239;16368;21807;27051;27092;27169;35328;36271;39742;43925;47391;47956;50954;50955;52868;63149	29668;29669;29670;29671;29672;29673;29674;29675;29676;29677;29678;29679;29680;29681;29682;29683;29684;29685;29686;29687;29688;29689;29690;29691;29692;29693;29694;29695;29750;29751;29752;29753;29754;29755;29756;29757;29758;29759;29760;33766;33767;33768;33769;33770;33771;33772;33773;33774;48691;48692;48693;48694;48695;48696;48697;48698;48699;48700;48701;48702;48703;48704;48705;48706;48707;48708;487…	27720;27721;27722;27723;27724;27725;27726;27727;27728;27729;27730;27731;27732;27733;27734;27735;27736;27737;27738;27739;27740;27741;27742;27743;27744;27745;27746;27795;27796;27797;27798;27799;27800;27801;27802;27803;27804;31427;31428;31429;31430;31431;31432;31433;31434;45278;45279;45280;45281;45282;45283;45284;45285;45286;45287;45288;45289;45290;45291;45292;45293;45294;45295;45296;45297;45298;452…	27723;27736;27804;31427;45278;63542;83049;86015;92728;92730;132460;138560;138562;141317;143151;176824;178214;238511;302942;303299;304281;400360;410310;447199;490468;525631;532377;566153;586258;707290	661;662;663	139;358;463
470	sp|O43251|RFOX2_HUMAN;sp|Q9NWB1|RFOX1_HUMAN;sp|A6NFN3|RFOX3_HUMAN	sp|O43251|RFOX2_HUMAN;sp|Q9NWB1|RFOX1_HUMAN;sp|A6NFN3|RFOX3_HUMAN	RNA binding protein fox-1 homolog 2 OS=Homo sapiens OX=9606 GN=RBFOX2 PE=1 SV=3; RNA binding protein fox-1 homolog 1 OS=Homo sapiens OX=9606 GN=RBFOX1 PE=1 SV=2; RNA binding protein fox-1 homolog 3 OS=Homo sapiens OX=9606 GN=RBFOX3 PE=1 SV=4	7;6;4	7;6;4	7;6;4	3	7	7	7	23.1	23.1	23.1	41.373	390	390;397;312	0	10.371	EKLHGTVVEGR;FRDPDLR;GFGFVTFENSADADR;ILDVEIIFNER;KIEVNNATAR;RLHVSNIPFR;VYTADPYHALAPAASYGVGAVASLYR		10876;15130;16772;23503;26510;43265;57188	True;True;True;True;True;True;True	11836;16532;18322;25634;28961;47921;63253	139620;192915;214210;214211;214212;214213;307737;307738;307739;348281;348282;348283;348284;348285;348286;348287;348288;348289;348290;348291;348292;348293;571017;571018;571019;571020;571021;571022;571023;571024;571025;571026;760084	130697;179862;199568;199569;199570;199571;287256;287257;287258;325130;325131;325132;325133;325134;325135;325136;325137;325138;325139;325140;532118;532119;532120;532121;532122;532123;532124;532125;532126;708513	130697;179862;199568;287256;325130;532124;708513
471	sp|O43252|PAPS1_HUMAN	sp|O43252|PAPS1_HUMAN	Bifunctional 3-phosphoadenosine 5-phosphosulfate synthase 1 OS=Homo sapiens OX=9606 GN=PAPSS1 PE=1 SV=2	18	17	17	1	18	17	17	42.5	40.2	40.2	70.832	624	624	0	145.92	ATNVTYQAHHVSR;AWTVLTEYYK;DDDVPLMWR;DIVPVDASYEVK;DLYEPSHGAK;GCTVWLTGLSGAGK;GFTGIDSEYEKPEAPELVLK;LFADAGLVCITSFISPYTQDR;LSNNAQNWGMQR;MVAGANFYIVGR;NPEFFEHR;QIHEGASLPFFEVFVDAPLHVCEQR;RPVLLLHPLGGWTK;TDAETLPALK;TDSCDVNDCVQQVVELLQER;TTVSMALEEYLVCHGIPCYTLDGDNIR;VLTMAPGLITLEIVPFR;VYWNDGLDQYR		4743;5418;6656;7419;7998;16273;16901;29191;33964;36846;38644;41063;43574;48589;48686;51436;54897;57222	True;True;True;True;True;False;True;True;True;True;True;True;True;True;True;True;True;True	5173;5908;7247;8077;8703;17787;18463;31871;37075;40836;42920;45554;48252;53753;53867;56910;60702;60703;63287	61727;61728;61729;61730;61731;61732;61733;61734;61735;61736;61737;61738;61739;61740;61741;61742;61743;61744;61745;61746;61747;61748;61749;61750;61751;61752;61753;61754;61755;61756;70320;86204;86205;86206;86207;96108;96109;96110;96111;96112;96113;96114;96115;103879;103880;103881;103882;207998;207999;208000;208001;208002;208003;208004;208005;208006;208007;208008;208009;208010;208011;208012;208013;2…	57510;57511;57512;57513;57514;57515;57516;57517;57518;57519;57520;57521;57522;57523;57524;57525;57526;57527;57528;57529;57530;57531;57532;65559;80708;89902;89903;89904;89905;89906;89907;89908;97257;97258;97259;97260;193843;193844;193845;193846;193847;193848;193849;193850;193851;193852;193853;193854;193855;193856;201367;201368;201369;201370;201371;201372;201373;201374;201375;201376;359497;359498;3…	57526;65559;80708;89902;97257;193849;201371;359502;418966;457215;479544;506954;536058;596604;597878;632244;678526;708837	664	548
472	sp|O43264|ZW10_HUMAN	sp|O43264|ZW10_HUMAN	Centromere/kinetochore protein zw10 homolog OS=Homo sapiens OX=9606 GN=ZW10 PE=1 SV=3	20	20	20	1	20	20	20	35.4	35.4	35.4	88.828	779	779	0	168.99	ALFQNTER;AMGTLLNTAISEVIGK;ASFVTEVLAHSGR;CQDVIVAAR;DLHVSTGEFTDLK;DSVVLSLLK;FLKGDTTDLLK;GPLAAAFSSSEVK;INVPELPTPDEDNKLEVQK;ITALEDISTEDGDRLYSLCK;LAPILCDGTATFVDLVPGFR;LGIVWQDVLPVNIYCK;LQQYEEIIQSTEEFENALK;LSEDIDLLK;LVLEVLQK;NCLVYSIPTNSSK;NIFHLFHDVVPTYHK;NLMTSEIHNTVK;TPMPPISSVLLAFSVLGELHSK;YQEEVPVYVPK		2777;3385;4309;6139;7730;8624;14504;18470;24200;25067;28084;29814;33378;33734;34848;37231;37820;38293;50682;59263	True;True;True;True;True;True;True;True;True;True;True;True;True;True;True;True;True;True;True;True	3011;3685;3686;4702;6691;8407;9400;15814;20182;26440;27406;30682;32551;36450;36832;38031;41353;41988;42506;56078;65517	35864;35865;43994;43995;43996;43997;43998;43999;44000;44001;44002;44003;44004;44005;44006;44007;56435;56436;56437;56438;56439;56440;56441;56442;56443;56444;56445;56446;56447;56448;56449;56450;56451;56452;79558;79559;79560;100037;100038;100039;111439;111440;111441;111442;111443;111444;111445;111446;111447;111448;111449;184973;184974;184975;184976;184977;184978;184979;236771;236772;236773;236774;23…	33381;40940;40941;40942;40943;40944;40945;40946;40947;40948;40949;40950;40951;40952;52655;52656;52657;52658;52659;52660;52661;52662;52663;52664;52665;52666;52667;52668;52669;52670;52671;52672;74233;93585;93586;93587;104342;104343;104344;104345;104346;104347;104348;104349;104350;172535;172536;172537;172538;220645;220646;220647;220648;220649;220650;220651;220652;296184;306855;346415;346416;346417;3…	33381;40945;52655;74233;93586;104348;172537;220646;296184;306855;346422;368270;412337;416168;429696;462942;469572;474702;623280;734051	665	653
473	sp|O43290|SNUT1_HUMAN	sp|O43290|SNUT1_HUMAN	U4/U6.U5 tri-snRNP-associated protein 1 OS=Homo sapiens OX=9606 GN=SART1 PE=1 SV=1	10	10	10	1	10	10	10	17.6	17.6	17.6	90.254	800	800	0	43.753	DLQGLTVEHAIDSFR;EAAGTTAAAGTGGATEQPPR;EAGTKEEPVTADVINPMALR;GLAAALLLCQNK;LEQGGTADGLR;LQAQSLSTVGPR;MSSSDTPLGTVALLQEK;QLQQLQQLR;TPYIVLSGSGK;YDEELEGERPHSFR		7888;9138;9283;17658;29099;32988;36745;41605;50788;58021	True;True;True;True;True;True;True;True;True;True	8581;9957;10114;10115;19283;31769;36025;40681;46132;56195;64151	102101;102102;102103;102104;102105;102106;102107;102108;118081;118082;120012;120013;120014;226071;226072;226073;226074;226075;226076;226077;226078;226079;384136;384137;384138;384139;384140;384141;384142;436293;436294;436295;436296;436297;436298;436299;488362;488363;549983;549984;549985;549986;549987;669679;669680;669681;669682;669683;669684;669685;770418;770419	95489;95490;95491;95492;95493;110593;112434;112435;112436;210608;210609;210610;210611;210612;210613;210614;210615;358343;358344;358345;358346;407469;407470;407471;407472;407473;455768;455769;512648;512649;624208;624209;624210;624211;624212;624213;624214;624215;624216;718173	95493;110593;112436;210609;358344;407470;455769;512649;624212;718173	666;667	159;759
474	sp|O43292|GPAA1_HUMAN	sp|O43292|GPAA1_HUMAN	Glycosylphosphatidylinositol anchor attachment 1 protein OS=Homo sapiens OX=9606 GN=GPAA1 PE=1 SV=3	3	3	3	1	3	3	3	5.5	5.5	5.5	67.622	621	621	0.00025069	6.0676	KLNHLLER;LHQSFFLYLLPGLSR;SGALPVAWLER		26814;30244;44879	True;True;True	29294;33029;49662	352716;400490;400491;400492;400493;400494;590736;590737;590738;590739;590740	329110;373834;373835;373836;550447;550448	329110;373834;550448
475	sp|O43293|DAPK3_HUMAN;sp|Q9UIK4|DAPK2_HUMAN	sp|O43293|DAPK3_HUMAN	Death-associated protein kinase 3 OS=Homo sapiens OX=9606 GN=DAPK3 PE=1 SV=1	4;1	4;1	4;1	2	4	4	4	11.2	11.2	11.2	52.535	454	454;370	0.00025025	6.0083	IAHFDLKPENIMLLDK;LIDFGIAHK;MTIAQSLEHSWIK;VLEEAAAAEEGLR		21619;30334;36800;54338	True;True;True;True	23608;33124;40761;60092	281984;281985;281986;281987;281988;402102;402103;402104;402105;489075;489076;720831	263367;263368;263369;375350;375351;375352;375353;456446;672118	263368;375351;456446;672118
476	sp|O43294|TGFI1_HUMAN	sp|O43294|TGFI1_HUMAN	Transforming growth factor beta-1-induced transcript 1 protein OS=Homo sapiens OX=9606 GN=TGFB1I1 PE=1 SV=2	17	17	17	1	17	17	17	59.4	59.4	59.4	49.814	461	461	0	275.91	AGKPYCQPCFLK;ASATSATLELDR;ASATSATLELDRLMASLSDFR;AWHPEHFVCGGCSTALGGSSFFEK;CGFCNQPIR;DFLQLFAPR;ECFAPFSGGSFFEHEGRPLCENHFHAR;FHPDHFTCTFCLRPLTK;GLCGSCNKPIAGQVVTALGR;GSLCATCGLPVTGR;GSLDTMLGLLQSDLSR;LLQELNATQFNITDEIMSQFPSSK;LMASLSDFR;MEDLDALLSDLETTTSHMPR;RDFLQLFAPR;SPKPAAPAAPPFSSSSGVLGTGLCELDR;VQNHLPASGPTQPPVVSSTNEGSPSPPEPTGK		1738;4228;4229;5401;5806;6857;9585;14033;17708;18979;18982;31785;32117;35742;42820;46659;55717	True;True;True;True;True;True;True;True;True;True;True;True;True;True;True;True;True	1880;4614;4615;4616;5891;6323;7465;10441;15305;19334;20736;20739;34675;35034;39110;39111;39112;47452;51633;61656	21251;21252;21253;21254;21255;21256;21257;21258;55408;55409;55410;55411;55412;55413;55414;55415;55416;55417;55418;55419;55420;55421;55422;55423;70178;75589;75590;75591;75592;75593;75594;88789;88790;88791;88792;88793;88794;88795;88796;88797;88798;88799;88800;88801;88802;88803;88804;88805;88806;88807;88808;88809;88810;88811;124202;124203;124204;124205;124206;124207;124208;179004;179005;179006;17900…	19775;19776;19777;19778;19779;19780;19781;19782;51721;51722;51723;51724;51725;51726;51727;51728;51729;51730;51731;51732;51733;51734;51735;51736;65423;70493;70494;70495;70496;70497;70498;83116;83117;83118;83119;83120;83121;83122;83123;83124;83125;83126;83127;83128;83129;83130;83131;83132;83133;83134;83135;83136;83137;83138;83139;83140;83141;116426;116427;116428;116429;116430;167038;167039;167040;2…	19778;51726;51735;65423;70493;83133;116427;167040;211170;226418;226433;393628;397395;441266;526316;573177;689714	668;669;670	1;18;162
477	sp|O43299|AP5Z1_HUMAN	sp|O43299|AP5Z1_HUMAN	AP-5 complex subunit zeta-1 OS=Homo sapiens OX=9606 GN=AP5Z1 PE=1 SV=2	3	3	3	1	3	3	3	3.5	3.5	3.5	88.604	807	807	0.0062399	2.3743	ATELLTLLK;DANTALPLALR;LSFPNLFK		4620;6526;33808	True;True;True	5043;7105;36909	60480;60481;84505;446501	56344;56345;79061;416859	56344;79061;416859
478	sp|O43301|HS12A_HUMAN	sp|O43301|HS12A_HUMAN	Heat shock 70 kDa protein 12A OS=Homo sapiens OX=9606 GN=HSPA12A PE=1 SV=2	2	2	2	1	2	2	2	3.9	3.9	3.9	74.977	675	675	0.0029399	2.8661	GAVLFGLDPAVIK;IIIPQDVGLTILK		16201;23093	True;True	17709;25194	207177;207178;207179;207180;301422;301423;301424;301425;301426	193088;193089;281305;281306;281307;281308;281309	193089;281306
479	sp|O43310|CTIF_HUMAN	sp|O43310|CTIF_HUMAN	CBP80/20-dependent translation initiation factor OS=Homo sapiens OX=9606 GN=CTIF PE=1 SV=1	2	2	2	1	2	2	2	3.3	3.3	3.3	67.586	598	598	0.0083218	2.1716	SLLLNMLQK;VLVCPIYTCLR		46007;54927	True;True	50888;60736	606787;606788;606789;606790;606791;728170;728171;728172;728173;728174;728175	565465;565466;565467;565468;678912;678913;678914;678915;678916	565467;678916
480	sp|O43314|VIP2_HUMAN	sp|O43314|VIP2_HUMAN	Inositol hexakisphosphate and diphosphoinositol-pentakisphosphate kinase 2 OS=Homo sapiens OX=9606 GN=PPIP5K2 PE=1 SV=3	6	6	5	1	6	6	5	5.6	5.6	4.7	140.41	1243	1243	0.000251	6.0845	ALADIVIPQEYGITK;FFDLFEK;ILPTPPATLK;QLQEVLDIAR;QTVCGFDLLR;TCDKVYSLIQSLTSQIR		2519;13659;23790;41584;42385;48520	True;True;True;True;True;True	2734;14891;25956;46109;46987;53679	32315;32316;32317;32318;32319;173805;312039;312040;549780;549781;549782;559170;639298;639299	30112;30113;30114;30115;162208;291264;291265;512465;512466;521113;595723	30112;162208;291264;512466;521113;595723
481	sp|O43324|MCA3_HUMAN	sp|O43324|MCA3_HUMAN	Eukaryotic translation elongation factor 1 epsilon-1 OS=Homo sapiens OX=9606 GN=EEF1E1 PE=1 SV=1	10	10	10	1	10	10	10	63.2	63.2	63.2	19.81	174	174	0	81.322	AAAAELSLLEK;AIVQQWLEYR;DLNSYLEDK;EYLLGSTAEEK;FIVDLTVQEK;NDIHTLLK;QANKEYLLGSTAEEK;QHLSSVVFIK;QIPVLQTNNGPSLTGLTTIAAHLVK;WFCHIQHYPGIR		16;2381;7858;13069;14240;37287;40288;40962;41125;57360	True;True;True;True;True;True;True;True;True;True	18;2583;8550;14253;15526;41411;44710;45446;45624;63431	166;167;168;169;170;171;172;30641;30642;30643;30644;30645;30646;30647;30648;30649;30650;30651;30652;30653;30654;30655;30656;30657;30658;30659;30660;30661;30662;101723;101724;101725;101726;101727;101728;101729;101730;101731;101732;101733;101734;165928;165929;165930;165931;165932;165933;165934;165935;165936;165937;165938;165939;165940;165941;165942;165943;165944;165945;165946;165947;165948;165949;1…	163;164;165;166;167;28627;28628;28629;28630;28631;28632;28633;28634;28635;28636;28637;28638;28639;28640;28641;28642;28643;28644;28645;28646;28647;28648;95131;95132;95133;95134;95135;95136;95137;95138;95139;95140;154915;154916;154917;154918;154919;154920;154921;154922;154923;154924;154925;154926;154927;154928;154929;154930;154931;154932;154933;154934;154935;154936;169462;463596;463597;497983;49798…	163;28635;95140;154915;169462;463596;497983;505595;507507;710339
482	sp|O43353|RIPK2_HUMAN	sp|O43353|RIPK2_HUMAN	Receptor-interacting serine/threonine-protein kinase 2 OS=Homo sapiens OX=9606 GN=RIPK2 PE=1 SV=2	2	2	2	1	2	2	2	4.3	4.3	4.3	61.194	540	540	0.00131	3.3394	CLIELEPVLR;LQPGIAQQWIQSK		5974;33309	True;True	6503;36374	77538;77539;77540;440587	72284;72285;72286;411430	72284;411430
483	sp|O43390|HNRPR_HUMAN	sp|O43390|HNRPR_HUMAN	Heterogeneous nuclear ribonucleoprotein R OS=Homo sapiens OX=9606 GN=HNRNPR PE=1 SV=1	23	19	19	1	23	19	19	40.3	34	34	70.942	633	633	0	111.7	AGPIWDLR;AIDALREFNEEGALSVLQQFK;DLYEDELVPLFEK;DYAFVHFEDR;EFNEEGALSVLQQFK;ENILEEFSK;ESDLSHVQNK;GFCFLEYEDHK;GYAFITFCGK;HLGVCISVANNR;KYGGPPPDSVYSGVQPGIGTEVFVGK;LCDSYEIRPGK;LKDYAFVHFEDR;LMMDPLSGQNR;NLATTVTEEILEK;SAFLCGVMK;STAYEDYYYHPPPR;TGYTLDVTTGQR;TKENILEEFSK;TLIEAGLPQK;VTEGLVDVILYHQPDDK;VWGNVVTVEWADPVEEPDPEVMAK;YGGPPPDSVYSGVQPGIGTEVFVGK		1828;2094;7997;9011;10046;11690;12179;16695;19679;20628;27629;28348;30744;32185;38073;43910;47439;49366;49760;50007;56251;57030;58381	False;True;True;True;True;True;True;False;True;True;True;True;True;True;True;False;True;False;True;True;True;True;True	1976;2266;8702;9817;10941;12742;13274;18240;21498;22516;30178;30968;33570;35136;35137;42264;48611;48612;52483;54601;55036;55304;62229;63086;64537	22483;22484;22485;22486;22487;22488;26519;26520;103858;103859;103860;103861;103862;103863;103864;103865;103866;103867;103868;103869;103870;103871;103872;103873;103874;103875;103876;103877;103878;116377;116378;116379;116380;129208;129209;129210;129211;129212;129213;129214;129215;129216;129217;129218;129219;129220;149414;149415;149416;149417;149418;149419;149420;149421;149422;149423;154869;154870;1…	20970;20971;20972;20973;20974;20975;24738;97235;97236;97237;97238;97239;97240;97241;97242;97243;97244;97245;97246;97247;97248;97249;97250;97251;97252;97253;97254;97255;97256;108975;108976;108977;108978;121040;121041;121042;121043;121044;121045;121046;121047;121048;121049;121050;121051;121052;139669;139670;139671;139672;139673;139674;139675;139676;144651;144652;144653;144654;144655;144656;198559;1…	20974;24738;97254;108977;121044;139673;144654;198589;235066;247672;341013;349897;380239;398325;472330;539920;582011;606028;612281;615127;696345;706626;722518	671;672;673	102;197;198
484	sp|O43395|PRPF3_HUMAN	sp|O43395|PRPF3_HUMAN	U4/U6 small nuclear ribonucleoprotein Prp3 OS=Homo sapiens OX=9606 GN=PRPF3 PE=1 SV=2	16	16	16	1	16	16	16	32.9	32.9	32.9	77.528	683	683	0	109.47	DQTKPTPLILDEQGR;DVNVVVVEGGPK;EIELTHR;FEEVEEEPEVIPGPPSESPGMLTK;FVDKLFEAVEEGR;IQAQLALKPGLIGNANMVGLANLHAMGIAPPK;LALIAPK;LFEAVEEGR;LGLMPPPEPK;LKEDISQGVHISVYR;LPIGNTIQPSQAATFMNDAIEK;LQAEISQAAR;QLSFISPPTPQPK;VLGFSEPTVVTAALNCVGK;VLGTEAVQDPTKVEAHVR;VSIAPSQR		8366;8899;10591;13562;15574;24427;27993;29247;29862;30752;32675;32960;41626;54452;54483;56009	True;True;True;True;True;True;True;True;True;True;True;True;True;True;True;True	9128;9692;11533;14785;17023;26690;30576;31928;32600;33580;35695;35997;46154;60212;60248;61969	108468;115205;115206;136071;172740;172741;198509;198510;198511;198512;198513;320127;370160;370161;370162;370163;370164;370165;370166;370167;386007;395078;407500;432776;432777;436039;436040;436041;436042;436043;550159;550160;550161;550162;550163;550164;550165;550166;550167;550168;550169;550170;550171;722023;722024;722025;722026;722027;722373;722374;722375;722376;743570;743571;743572;743573;743574;…	101615;107904;107905;127390;161227;185003;185004;185005;298742;345205;345206;345207;345208;345209;345210;345211;360068;368767;380321;404176;404177;407232;407233;407234;407235;512807;512808;512809;512810;512811;512812;512813;512814;512815;512816;512817;512818;512819;512820;673221;673222;673538;673539;673540;693257;693258;693259	101615;107905;127390;161227;185005;298742;345205;360068;368767;380321;404176;407234;512815;673222;673540;693258
485	sp|O43396|TXNL1_HUMAN	sp|O43396|TXNL1_HUMAN	Thioredoxin-like protein 1 OS=Homo sapiens OX=9606 GN=TXNL1 PE=1 SV=3	16	16	16	1	16	16	16	66.8	66.8	66.8	32.251	289	289	0	323.31	AGCECLNESDEHGFDNCLR;AGCECLNESDEHGFDNCLRK;FQGPDNGQGPK;FQNVNSVTIFVQSNQGEEETTR;GYMDLMPFINK;IAPAFSSMSNK;IDQYQGADAVGLEEK;IFINLPR;IKQHLENDPGSNEDTDIPK;ISYFTFIGTPVQATNMNDFK;ISYFTFIGTPVQATNMNDFKR;QHLENDPGSNEDTDIPK;SEPTQALELTEDDIKEDGIVPLR;SMDFEEAER;VGVKPVGSDPDFQPELSGAGSR;VRIDQYQGADAVGLEEK		1619;1620;15028;15071;19778;21680;22043;22418;23367;25042;25043;40958;44590;46326;53554;55850	True;True;True;True;True;True;True;True;True;True;True;True;True;True;True;True	1748;1749;16416;16468;21605;21606;21607;23672;23673;24068;24466;25487;27378;27379;27380;27381;45442;49350;51240;51241;59222;61797	19282;19283;19284;19285;19286;19287;19288;19289;19290;191636;191637;191638;191639;191640;191641;191642;191643;191644;191645;191646;191647;191648;191649;192159;192160;253893;253894;253895;253896;253897;253898;253899;253900;253901;253902;253903;253904;253905;253906;253907;253908;253909;253910;253911;253912;253913;253914;253915;253916;253917;253918;253919;253920;253921;253922;253923;282938;282939;28…	17925;17926;17927;17928;17929;17930;17931;17932;17933;178710;178711;178712;178713;178714;178715;178716;178717;178718;178719;178720;178721;179197;179198;236515;236516;236517;236518;236519;236520;236521;236522;236523;236524;236525;236526;236527;236528;236529;236530;236531;236532;236533;236534;236535;236536;236537;236538;236539;236540;236541;236542;236543;236544;264239;264240;264241;264242;264243;26…	17925;17933;178715;179198;236517;264241;268484;272767;285507;306593;306596;505517;547551;569159;660301;691188	674;675;676;677;678	47;124;127;204;275
486	sp|O43399|TPD54_HUMAN	sp|O43399|TPD54_HUMAN	Tumor protein D54 OS=Homo sapiens OX=9606 GN=TPD52L2 PE=1 SV=2	12	12	12	1	12	12	12	61.7	61.7	61.7	22.237	206	206	0	264.5	GLLSDSMTDVPVDTGVAAR;LGLSTLGELK;LGLSTLGELKQNLSR;MDSAGQDINLNSPNK;RLGLSTLGELK;SWHDVQVSSAYVK;TPAVEGLTEAEEEELRAELTK;TQETLSQAGQK;TSAALSTVGSAISR;VEEEIVTLR;VTQSDLYK;VTQSDLYKK		17955;29880;29881;35705;43256;48051;50527;50825;50988;52809;56426;56427	True;True;True;True;True;True;True;True;True;True;True;True	19588;19589;32618;32619;39060;39061;47912;53152;55904;56234;56409;58412;62422;62423	229604;229605;229606;229607;229608;229609;229610;229611;229612;229613;229614;229615;229616;229617;229618;229619;229620;229621;229622;229623;229624;229625;229626;229627;229628;229629;229630;229631;229632;229633;229634;229635;229636;229637;229638;229639;229640;229641;229642;229643;229644;229645;229646;229647;229648;395291;395292;395293;395294;395295;395296;395297;395298;395299;395300;395301;395302;…	213886;213887;213888;213889;213890;213891;213892;213893;213894;213895;213896;213897;213898;213899;213900;213901;213902;213903;213904;213905;213906;213907;213908;213909;213910;213911;213912;213913;213914;213915;213916;213917;213918;213919;213920;213921;213922;213923;213924;213925;213926;213927;368954;368955;368956;368957;368958;368959;368960;368961;368962;368963;368964;368965;368966;368967;368968;…	213919;368956;368979;440829;532076;589454;621405;624564;626152;650819;698495;698514	679;680	1;22
487	sp|O43402|EMC8_HUMAN	sp|O43402|EMC8_HUMAN	ER membrane protein complex subunit 8 OS=Homo sapiens OX=9606 GN=EMC8 PE=1 SV=1	6	6	6	1	6	6	6	29.5	29.5	29.5	23.773	210	210	0	9.5615	DASPNQVAEK;FTMDCVAPTIHVYEHHENR;ISASLLDSR;LTTQAYCK;VKDASPNQVAEK;YPHCAVNGLLVAEK		6555;15481;24745;34541;54056;59189	True;True;True;True;True;True	7138;16917;27033;37708;59789;65436	84906;84907;84908;84909;84910;84911;197428;197429;197430;197431;197432;197433;197434;197435;324324;324325;324326;324327;324328;324329;324330;324331;324332;324333;324334;456192;456193;456194;456195;456196;716349;716350;716351;716352;716353;716354;716355;786360;786361;786362;786363	79438;79439;79440;79441;79442;79443;184034;184035;184036;184037;302805;302806;302807;302808;302809;302810;302811;302812;302813;425829;425830;425831;425832;425833;425834;667994;667995;667996;667997;732990;732991;732992;732993	79440;184034;302806;425831;667996;732992
488	sp|O43414|ERI3_HUMAN	sp|O43414|ERI3_HUMAN	ERI1 exoribonuclease 3 OS=Homo sapiens OX=9606 GN=ERI3 PE=1 SV=2	4	4	4	1	4	4	4	16.9	16.9	16.9	37.238	337	337	0	9.3646	AYSFAMGCWPK;EGLLDPNVK;GLSLQHIGRPHSGIDDCK;VMLPGQCQYLGLPVADYFK		5538;10287;18061;55073	True;True;True;True	6035;11199;19706;60914;60915	71896;71897;71898;71899;71900;132035;132036;132037;132038;132039;132040;230726;230727;230728;230729;230730;230731;230732;230733;230734;230735;230736;230737;730086;730087	66997;66998;66999;67000;67001;123682;123683;123684;123685;123686;214896;214897;214898;214899;214900;214901;214902;214903;680682;680683;680684	66998;123684;214900;680682	681	253
489	sp|O43426|SYNJ1_HUMAN	sp|O43426|SYNJ1_HUMAN	Synaptojanin-1 OS=Homo sapiens OX=9606 GN=SYNJ1 PE=1 SV=2	6	6	6	1	6	6	6	5.9	5.9	5.9	173.1	1573	1573	0.00023958	4.9846	ALLTTGSLR;GFEANAPAFDR;GSVPLFWEQPGLQVGSHR;ILYTWTPGTLLHYGR;NQTLTDWLLDAPK;RPPPPPVPLLPPGTSPPVDPFTTLASK		2991;16710;19118;23973;38854;43539	True;True;True;True;True;True	3235;18257;20885;26151;43149;48216	38584;213294;244692;244693;314202;516516;574674	35899;198694;227941;227942;293249;481884;535622	35899;198694;227941;293249;481884;535622
490	sp|O43427|FIBP_HUMAN	sp|O43427|FIBP_HUMAN	Acidic fibroblast growth factor intracellular-binding protein OS=Homo sapiens OX=9606 GN=FIBP PE=1 SV=3	3	3	3	1	3	3	3	8.2	8.2	8.2	41.878	364	364	0.00067039	3.6866	DLFVDLVEK;GLVNVAAK;VLVADKDLLDLHK		7693;18128;54917	True;True;True	8367;19780;60725	99510;232103;232104;728048;728049;728050	93069;216276;216277;678802;678803;678804	93069;216277;678804
491	sp|O43432|IF4G3_HUMAN	sp|O43432|IF4G3_HUMAN	Eukaryotic translation initiation factor 4 gamma 3 OS=Homo sapiens OX=9606 GN=EIF4G3 PE=1 SV=2	10	7	7	1	10	7	7	6.8	5.2	5.2	176.65	1585	1585	0	8.192	DHMGQLLYQLVQSEK;ELTIEFSKPLLPVGR;GPDFTPAFADFGR;LDQPANLLR;LLTTIGK;LLTTIGKDLDFEK;LSATESIVEIVK;NHDEESLECLCR;VGVESTLER;VLEEDESIR		7172;11481;18393;28694;31999;32000;33669;37708;53548;54340	True;True;True;True;False;False;True;False;True;True	7818;12483;20097;31339;34908;34909;36758;41864;59216;60094	93008;146722;146723;146724;235703;235704;235705;379706;379707;379708;379709;379710;379711;423913;423914;423915;423916;423917;423918;423919;423920;423921;423922;423923;423924;423925;423926;444958;444959;501813;501814;708197;708198;708199;708200;708201;708202;720859;720860;720861	87006;137122;137123;219644;219645;354361;354362;354363;354364;354365;354366;395864;395865;395866;395867;395868;395869;395870;395871;395872;395873;395874;395875;395876;415463;415464;468259;660232;660233;660234;660235;672152;672153;672154	87006;137122;219644;354363;395865;395870;415463;468259;660233;672154	682	1277
492	sp|O43447|PPIH_HUMAN	sp|O43447|PPIH_HUMAN	Peptidyl-prolyl cis-trans isomerase H OS=Homo sapiens OX=9606 GN=PPIH PE=1 SV=1	6	6	6	1	6	6	6	34.5	34.5	34.5	19.208	177	177	0.00025138	6.1276	GPFADENFK;IELFADVVPK;IENVPTGPNNKPK;IIDGLLVMR;LPVVISQCGEM;QFCTGEFRK		18419;22228;22251;22993;32926;40686	True;True;True;True;True;True	20129;24259;24284;25084;25085;35961;45145	236045;236046;236047;236048;236049;236050;236051;236052;236053;236054;236055;236056;236057;236058;236059;289839;289840;289841;289842;289843;290034;290035;299951;299952;299953;299954;299955;299956;299957;299958;299959;299960;299961;299962;299963;299964;299965;299966;299967;299968;299969;299970;299971;299972;299973;299974;299975;299976;299977;299978;299979;299980;435644;435645;435646;435647;539018;…	219967;219968;219969;219970;219971;219972;219973;219974;219975;219976;270619;270620;270621;270785;279934;279935;279936;279937;279938;279939;279940;279941;279942;279943;279944;279945;279946;279947;279948;279949;279950;279951;279952;279953;279954;279955;279956;279957;279958;406870;406871;406872;406873;502564;502565;502566	219974;270620;270785;279935;406870;502565	683;684	151;177
493	sp|O43451|MGA_HUMAN;sp|Q2M2H8|MGAL_HUMAN	sp|O43451|MGA_HUMAN;sp|Q2M2H8|MGAL_HUMAN	Maltase-glucoamylase OS=Homo sapiens OX=9606 GN=MGAM PE=1 SV=6; Probable maltase-glucoamylase 2 OS=Homo sapiens OX=9606 GN=MGAM2 PE=1 SV=3	2;1	2;1	2;1	2	2	2	2	1.1	1.1	1.1	312.02	2753	2753;2515	0.0056646	2.4408	AYVAFPDFFR;LEVNISQSTYK		5551;29172	True;True	6050;31848	72051;385101;385102;385103;385104;385105;385106;385107;385108;385109;385110;385111;385112;385113;385114;385115;385116;385117	67145;359232;359233;359234;359235;359236;359237;359238;359239;359240;359241;359242;359243;359244;359245	67145;359238
494	sp|O43464|HTRA2_HUMAN;sp|P83110|HTRA3_HUMAN	sp|O43464|HTRA2_HUMAN	Serine protease HTRA2, mitochondrial OS=Homo sapiens OX=9606 GN=HTRA2 PE=1 SV=2	8;1	8;1	8;1	2	8	8	8	27.9	27.9	27.9	48.84	458	458;453	0	19.013	EPLPTLPLGR;LLSGDTYEAVVTAVDPVADIATLR;QGEFVVAMGSPFALQNTITSGIVSSAQRPAR;SQYNFIADVVEK;TAPAVVYIEILDRHPFLGR;TQSQLAVQIR;VILGSPAHR;VTAGISFAIPSDR		11845;31879;40795;47018;48414;50922;53896;56194	True;True;True;True;True;True;True;True	12913;34778;45264;52027;53566;56337;59601;62169	151044;422515;540183;619551;619552;619553;619554;619555;619556;619557;637713;637714;637715;637716;637717;637718;637719;637720;637721;637722;637723;671011;671012;671013;671014;713842;713843;713844;713845;713846;713847;746060;746061;746062;746063;746064;746065;746066	141140;394591;503618;577356;577357;577358;577359;577360;577361;594215;594216;594217;594218;594219;594220;594221;594222;594223;594224;594225;625432;625433;625434;625435;665641;665642;665643;665644;665645;665646;665647;695520;695521;695522;695523;695524	141140;394591;503618;577356;594215;625433;665645;695522
495	sp|O43488|ARK72_HUMAN;sp|Q8NHP1|ARK74_HUMAN;sp|O95154|ARK73_HUMAN	sp|O43488|ARK72_HUMAN	Aflatoxin B1 aldehyde reductase member 2 OS=Homo sapiens OX=9606 GN=AKR7A2 PE=1 SV=3	13;3;1	13;3;1	13;3;1	3	13	13	13	43.7	43.7	43.7	39.589	359	359;331;331	0	124.58	ALQAAYGASAPSVTSAALR;EHHFEAIALVEK;FFGNSWAETYR;FYAYNPLAGGLLTGK;LQCPQVDLFYLHAPDHGTPVEETLHACQR;MDAPASAAAVR;QVETELFPCLR;RLQCPQVDLFYLHAPDHGTPVEETLHACQR;RMDAPASAAAVR;SLKPDSVR;SNGWILPTVYQGMYNATTR;SQLETSLKR;VASVLGTMEMGR		3069;10454;13687;15793;33003;35641;42446;43324;43382;45955;46441;46908;52356	True;True;True;True;True;True;True;True;True;True;True;True;True	3323;11385;14922;17262;36040;38953;47050;47981;48041;48042;50835;51399;51910;57926;57927;57928	39602;39603;39604;39605;39606;39607;39608;39609;39610;39611;39612;39613;39614;39615;39616;39617;39618;39619;39620;39621;39622;39623;39624;39625;39626;39627;39628;39629;39630;39631;134211;134212;134213;134214;134215;134216;134217;134218;134219;134220;134221;134222;134223;134224;134225;134226;134227;134228;134229;134230;134231;134232;134233;134234;134235;134236;134237;134238;134239;174180;174181;17…	36835;36836;36837;36838;36839;36840;36841;36842;36843;36844;36845;36846;36847;36848;36849;36850;36851;36852;36853;36854;36855;36856;36857;36858;36859;36860;36861;36862;125702;125703;125704;125705;125706;125707;125708;125709;125710;125711;125712;125713;125714;125715;125716;125717;125718;125719;125720;125721;125722;125723;125724;125725;125726;125727;125728;125729;125730;162565;162566;162567;162568;…	36840;125730;162573;187781;407712;439828;521951;532603;533183;565009;570530;576027;645245	685;686;687	45;47;51
496	sp|O43491|E41L2_HUMAN	sp|O43491|E41L2_HUMAN	Band 4.1-like protein 2 OS=Homo sapiens OX=9606 GN=EPB41L2 PE=1 SV=1	31	31	28	1	31	31	28	36.5	36.5	33.6	112.59	1005	1005	0	136.64	APHLQLIEGK;APHLQLIEGKK;DSSQLGTDATK;EISPGSGPGEIR;EQHPDMSVTR;EVPIVQTETK;EVQTNELK;EVQTNELKAEK;FIPPWLKK;FLTLGSK;GDAEEMAQK;GLSPAQADSQFLENAK;GLSPAQADSQFLENAKR;HQASISELKR;HSNLMLEELDKAQEDILK;ITPLSLQTQGSSHETLNIVEEK;IVITGDGDIDHDQALAQAIR;LSMYGVDLHHAK;LVSPEQPPK;QASTLIDRPAPHFER;SLDGAPIGVMDQSLMK;SYTLVVAK;TEMVTISDASQR;TTEVGSVSEVKK;VCEHLNLLEK;VCVEHHTFYR;VEGDNIYVR;VEMQPTELVSK;VRPAELEQFESTIGFK;VTLLDGTEYSCDLEK;VVER…		3706;3707;8601;10758;11962;12862;12888;12889;14193;14669;16284;18068;18069;20994;21139;25225;25455;33956;35042;40334;45716;48204;48865;51273;52459;52506;52852;52918;55855;56348;56638	True;True;True;True;True;True;True;True;True;True;True;True;True;True;True;True;True;True;True;True;True;True;True;True;True;True;True;True;True;True;True	4050;4051;9376;11710;13035;14027;14056;14057;15475;16004;17801;19714;19715;22930;23089;23090;27578;27830;37066;37067;38242;44758;50581;50582;53322;54062;54063;56726;56727;58036;58085;58457;58527;58528;61802;62334;62660	47658;47659;47660;47661;47662;47663;47664;47665;47666;47667;47668;47669;47670;47671;47672;47673;47674;47675;111167;111168;111169;111170;111171;111172;137853;137854;137855;137856;137857;137858;137859;137860;137861;137862;137863;137864;152347;152348;152349;152350;163183;163184;163185;163186;163187;163188;163189;163190;163191;163192;163193;163194;163195;163551;163552;163553;163554;163555;163556;1635…	44298;44299;44300;44301;44302;44303;44304;44305;44306;44307;44308;44309;44310;44311;44312;44313;104092;104093;104094;104095;104096;128984;128985;128986;128987;128988;128989;128990;128991;128992;128993;128994;142307;142308;142309;152348;152349;152350;152351;152352;152353;152354;152355;152356;152357;152358;152359;152688;152689;152690;152691;152692;152693;152694;152695;152696;152697;152698;152699;15…	44299;44309;104092;128984;142307;152352;152693;152702;168881;174462;194047;214965;214980;253131;255052;308814;311636;418832;432883;498527;561193;591437;599725;629746;646969;647420;651204;652062;691236;697464;701431	688;689;690;691;692;693	163;403;559;564;630;877
497	sp|O43493|TGON2_HUMAN	sp|O43493|TGON2_HUMAN	Trans-Golgi network integral membrane protein 2 OS=Homo sapiens OX=9606 GN=TGOLN2 PE=1 SV=4	10	10	10	1	10	10	10	26.8	26.8	26.8	45.879	437	437	0	56.794	EAEDDDTGPEEGSPPKEEK;EGTLSDSTGSEK;IIAFVLEGK;IIAFVLEGKR;SGAEAQTPEDSPNR;SGAEDQTPKDVPNK;SGAEEQGPIDGPSK;SSAEAQTPEDTPNK;SSEPTEDVEPK;VVPEQPSRK		9199;10396;22948;22949;44866;44867;44868;47079;47138;56839	True;True;True;True;True;True;True;True;True;True	10024;11322;25034;25035;49648;49649;49650;52094;52158;62877	118883;118884;133337;133338;133339;133340;133341;133342;133343;299305;299306;299307;299308;299309;299310;299311;299312;299313;299314;299315;299316;299317;299318;299319;299320;299321;299322;299323;299324;299325;299326;299327;590528;590529;590530;590531;590532;590533;590534;590535;590536;590537;590538;590539;590540;590541;590542;590543;590544;590545;590546;590547;590548;590549;590550;590551;590552;…	111350;111351;124861;124862;124863;124864;124865;279328;279329;279330;279331;279332;279333;279334;279335;279336;279337;279338;279339;279340;279341;279342;279343;279344;279345;550245;550246;550247;550248;550249;550250;550251;550252;550253;550254;550255;550256;550257;550258;550259;550260;550261;550262;550263;550264;550265;550266;550267;550268;550269;550270;550271;550272;550273;550274;550275;550276;…	111350;124864;279331;279339;550245;550264;550273;577830;578577;704462
498	sp|O43504|LTOR5_HUMAN	sp|O43504|LTOR5_HUMAN	Ragulator complex protein LAMTOR5 OS=Homo sapiens OX=9606 GN=LAMTOR5 PE=1 SV=1	2	2	2	1	2	2	2	33	33	33	9.6138	91	91	0.0002594	6.9011	GTLSDEHAGVISVLAQQAAK;HDGITVAVHK		19254;19978	True;True	21027;21817	246192;246193;246194;246195;246196;246197;246198;246199;256094;256095;256096;256097;256098;256099;256100;256101;256102;256103;256104;256105;256106;256107;256108;256109;256110;256111;256112;256113;256114;256115;256116;256117;256118;256119;256120	229285;229286;229287;229288;229289;238591;238592;238593;238594;238595;238596;238597;238598;238599;238600;238601;238602;238603;238604;238605;238606;238607;238608;238609	229285;238593
499	sp|O43505|B4GA1_HUMAN	sp|O43505|B4GA1_HUMAN	Beta-1,4-glucuronyltransferase 1 OS=Homo sapiens OX=9606 GN=B4GAT1 PE=1 SV=1	5	5	5	1	5	5	5	22.2	22.2	22.2	47.119	415	415	0.00024814	5.8454	EPGEFALLR;ISQACELHVAGFDFEVLNEGFLVHK;TALASGGVLDASGDYR;TTMDPNDVILATHASVDNLLHLSGLLER;WEGPLSVSVFAATK		11830;24955;48357;51346;57333	True;True;True;True;True	12897;27279;53496;56811;63403	150877;150878;327131;636764;677257;761808	140994;140995;305400;593349;631315;710085	140994;305400;593349;631315;710085
500	sp|O43583|DENR_HUMAN	sp|O43583|DENR_HUMAN	Density-regulated protein OS=Homo sapiens OX=9606 GN=DENR PE=1 SV=2	6	6	6	1	6	6	6	31.3	31.3	31.3	22.092	198	198	0	18.874	AADISESSGADCK;AADISESSGADCKGDPR;LDADYPLR;LTVENSPK;VCGLATFEIDLK;WPEVDDDSIEDLGEVKK		143;144;28447;34556;52469;57619	True;True;True;True;True;True	151;152;31074;37723;58046;63713	1647;1648;1649;1650;1651;1652;1653;1654;1655;1656;1657;1658;1659;1660;1661;1662;376954;376955;376956;376957;376958;376959;376960;376961;376962;376963;376964;376965;376966;456414;456415;456416;456417;456418;694033;765502;765503;765504;765505;765506;765507;765508;765509;765510;765511;765512;765513;765514;765515;765516;765517;765518	1561;1562;1563;1564;1565;1566;1567;1568;1569;1570;1571;1572;1573;351835;351836;351837;351838;351839;351840;351841;351842;351843;351844;351845;351846;351847;351848;426032;426033;426034;426035;426036;647081;713609;713610;713611;713612;713613;713614;713615;713616;713617;713618;713619;713620;713621;713622;713623	1569;1573;351840;426034;647081;713617
501	sp|O43592|XPOT_HUMAN	sp|O43592|XPOT_HUMAN	Exportin-T OS=Homo sapiens OX=9606 GN=XPOT PE=1 SV=2	25	25	25	1	25	25	25	36.8	36.8	36.8	109.96	962	962	0	101.74	ALAYFEQLK;ANVEAIMLAVMK;ASALQDMMR;DGPVGFADFVYK;DLQEFIPLINQITAK;DVVHTSEEAR;ETLISWLQAQMLNPQPEK;FFCFQVLEHQVK;FFTVEPQHIPCVLMAFLDHR;HIVPACFLAPLK;ILMAIDSELVDRDVVHTSEEAR;ISPDAWQVCAEALAQR;LAQVSPELLLASVR;LLYMLAEALPVSHGAHFSGDVSK;MIICLEEEVLPFIPSASEHMLK;NAQEALQAIETK;NLLTPLMEK;QASLADCLNHAVGFASR;QLTVLSDQQK;QMNPFIEDILNR;TCFIILSK;TLVTSGVSSYQHTSVTLEFFETVVR;VFSSTLQNWQTTR;VLVTVIQGAVEYPDPIAQK;YSELTTVQQQLIR		2581;3592;4216;7058;7885;8965;12486;13647;13759;20497;23731;24946;28166;32098;36113;37153;38279;40323;41668;41745;48530;50302;53231;54982;59402	True;True;True;True;True;True;True;True;True;True;True;True;True;True;True;True;True;True;True;True;True;True;True;True;True	2799;3928;4600;4601;7690;8578;9768;13610;14877;14999;22374;25886;27269;30774;35011;39683;41261;42489;42490;44745;46199;46298;46299;53690;55626;58869;60793;65664	33082;33083;33084;33085;33086;33087;33088;33089;33090;46193;46194;46195;46196;46197;46198;46199;46200;46201;46202;46203;46204;46205;55253;55254;55255;55256;55257;55258;91260;91261;91262;91263;91264;91265;91266;91267;91268;91269;91270;91271;91272;102025;102026;102027;102028;102029;102030;102031;102032;102033;102034;102035;102036;102037;102038;102039;102040;102041;102042;102043;102044;102045;102046…	30816;30817;30818;30819;30820;30821;42919;42920;42921;42922;42923;42924;42925;42926;42927;42928;42929;42930;51588;51589;51590;51591;85386;85387;85388;85389;85390;85391;85392;85393;85394;85395;85396;85397;95411;95412;95413;95414;95415;95416;95417;95418;95419;95420;95421;95422;95423;95424;95425;95426;95427;95428;95429;95430;95431;95432;95433;95434;95435;108475;108476;108477;108478;147900;147901;147…	30816;42930;51589;85389;95412;108476;147901;162076;163417;246068;290531;305339;347542;397121;446499;461862;474609;498413;513267;514085;595834;618525;656204;679501;735518	694;695;696	481;482;559
502	sp|O43598|DNPH1_HUMAN	sp|O43598|DNPH1_HUMAN	5-hydroxymethyl-dUMP N-hydrolase OS=Homo sapiens OX=9606 GN=DNPH1 PE=1 SV=1	7	7	7	1	7	7	7	44.3	44.3	44.3	19.108	174	174	0	15.591	AAAMVPGR;FGTVLTEHVAAAELGAR;GEPGRPALYFCGSIR;ILCLFRPQSGR;RFGTVLTEHVAAAELGAR;VLSAMIR;YFEADPPGQVAASPDPTT		76;13963;16603;23457;42926;54801;58226	True;True;True;True;True;True;True	81;82;15229;18146;25585;47569;60597;64371	744;745;746;747;748;749;750;177817;177818;177819;177820;177821;177822;177823;177824;177825;177826;177827;212169;212170;212171;212172;212173;212174;212175;212176;212177;212178;307187;307188;307189;307190;307191;307192;307193;307194;307195;307196;307197;307198;307199;307200;566133;566134;566135;566136;566137;566138;566139;566140;726397;726398;726399;726400;726401;726402;726403;726404;726405;726406;…	687;688;689;690;165918;165919;165920;165921;165922;165923;197667;197668;197669;197670;286741;286742;286743;286744;286745;286746;286747;286748;286749;286750;286751;286752;286753;527468;527469;527470;527471;677271;677272;677273;677274;677275;677276;677277;677278;677279;720640;720641;720642;720643;720644;720645;720646	690;165922;197669;286745;527469;677276;720645	697	5
503	sp|O43615|TIM44_HUMAN	sp|O43615|TIM44_HUMAN	Mitochondrial import inner membrane translocase subunit TIM44 OS=Homo sapiens OX=9606 GN=TIMM44 PE=1 SV=2	18	18	18	1	18	18	18	40.9	40.9	40.9	51.355	452	452	0	45.564	ALGLQFHSR;ALSQGVESVKK;ALTDKVTDLLGGLFSK;DQDELNPYAAWR;EIDDSVLGQTGPYR;GEVVEGDPDK;GFLSGLLDNVK;GFLSGLLDNVKQELAK;IKEGVEEAAK;ILDIDNVDLAMGK;LGELTGTVK;MLYVWALCR;RLEESDVLQEAR;TEMSEVLTEILR;TIESETVR;VDPAFDKDR;VFEPNEEALGVVLHK;VTDLLGGLFSK		2806;3182;3205;8285;10568;16656;16831;16832;23306;23477;29683;36418;43218;48864;49539;52680;53089;56230	True;True;True;True;True;True;True;True;True;True;True;True;True;True;True;True;True;True	3040;3447;3471;9041;11509;18200;18389;18390;25422;25606;25607;32406;40164;47873;54060;54061;54789;58272;58712;62205	36168;36169;36170;36171;36172;36173;36174;36175;36176;36177;36178;36179;40909;40910;40911;40912;40913;40914;40915;40916;40917;41153;41154;41155;41156;41157;41158;41159;41160;41161;41162;41163;41164;41165;41166;41167;107637;107638;107639;107640;107641;135826;135827;212641;212642;212643;215183;215184;215185;215186;215187;215188;304940;304941;304942;304943;304944;304945;304946;304947;304948;307410;3…	33652;33653;33654;33655;33656;33657;33658;33659;33660;33661;33662;33663;38053;38054;38055;38056;38057;38058;38278;38279;38280;38281;38282;38283;38284;38285;38286;38287;38288;38289;38290;38291;38292;100843;100844;100845;100846;127182;127183;198095;198096;198097;200493;200494;200495;200496;200497;284711;284712;284713;284714;284715;284716;286945;286946;286947;286948;286949;286950;286951;286952;28695…	33660;38055;38280;100843;127182;198095;200493;200497;284716;286956;366011;450966;531797;599702;609220;649402;654388;696120	698;699	296;379
504	sp|O43617|TPPC3_HUMAN	sp|O43617|TPPC3_HUMAN	Trafficking protein particle complex subunit 3 OS=Homo sapiens OX=9606 GN=TRAPPC3 PE=1 SV=1	6	6	6	1	6	6	6	35	35	35	20.274	180	180	0	12.081	ETADVIAK;FVQDTLKGDGVTEIR;GALEMVQMAVEAK;LIEDFLAR;MGFNIGVR;RIEDNLPAGEE		12391;15693;16059;30366;35963;43087	True;True;True;True;True;True	13509;17158;17556;33157;39449;47737	157339;200290;200291;200292;200293;200294;200295;200296;200297;200298;200299;200300;200301;200302;200303;200304;200305;200306;200307;200308;200309;200310;200311;200312;200313;200314;200315;205222;205223;402515;402516;402517;402518;402519;402520;402521;402522;402523;402524;402525;402526;402527;402528;402529;402530;402531;476058;476059;476060;476061;476062;476063;476064;476065;476066;476067;476068;…	146959;186679;186680;186681;186682;186683;186684;186685;186686;186687;186688;186689;186690;186691;186692;186693;186694;186695;186696;191253;191254;375717;375718;375719;375720;375721;375722;375723;375724;375725;375726;375727;375728;375729;375730;444424;444425;444426;444427;444428;444429;444430;444431;444432;444433;444434;444435;444436;530555;530556;530557;530558;530559;530560;530561;530562;530563;…	146959;186692;191254;375718;444425;530565
505	sp|O43633|CHM2A_HUMAN	sp|O43633|CHM2A_HUMAN	Charged multivesicular body protein 2a OS=Homo sapiens OX=9606 GN=CHMP2A PE=1 SV=1	5	5	5	1	5	5	5	24.3	24.3	24.3	25.104	222	222	0.00025707	6.6605	ANIQAVSLK;KAEAAASALADADADLEER;KTPEELLR;QGQMDAVR;SNNSMAQAMK		3511;25834;27386;40880;46491	True;True;True;True;True	3841;28231;29920;45355;51454	45282;45283;45284;45285;45286;338890;360792;360793;360794;360795;360796;360797;360798;541330;612736;612737;612738	42093;42094;316414;336483;336484;336485;336486;336487;336488;504702;570959;570960	42093;316414;336484;504702;570959
506	sp|O43657|TSN6_HUMAN	sp|O43657|TSN6_HUMAN	Tetraspanin-6 OS=Homo sapiens OX=9606 GN=TSPAN6 PE=1 SV=1	2	2	2	1	2	2	2	8.6	8.6	8.6	27.563	245	245	0.0041169	2.6357	LEDCTPQR;VSLENYFSLLNEK		28832;56037	True;True	31489;61999	381348;381349;381350;744316;744317;744318;744319;744320;744321;744322	355855;355856;355857;693952;693953;693954;693955;693956	355855;693952
507	sp|O43660|PLRG1_HUMAN	sp|O43660|PLRG1_HUMAN	Pleiotropic regulator 1 OS=Homo sapiens OX=9606 GN=PLRG1 PE=1 SV=1	6	6	6	1	6	6	6	12.6	12.6	12.6	57.193	514	514	0	14.066	ASVHTLSGHTNAVATVR;HSVHTLVFR;HYTFASGSPDNIK;LLTAEADK;LWDLVAGK;VISGHLGWVR		4513;21191;21504;31948;35164;53989	True;True;True;True;True;True	4921;23149;23485;34852;38380;59712	58917;58918;58919;58920;274494;274495;274496;274497;274498;274499;274500;274501;280596;423238;465407;465408;465409;465410;465411;465412;465413;465414;465415;465416;715384;715385;715386;715387	54910;54911;54912;255962;255963;255964;255965;255966;255967;255968;255969;262060;395257;434546;434547;434548;434549;434550;434551;434552;434553;667084;667085	54910;255962;262060;395257;434546;667084
508	sp|O43663|PRC1_HUMAN	sp|O43663|PRC1_HUMAN	Protein regulator of cytokinesis 1 OS=Homo sapiens OX=9606 GN=PRC1 PE=1 SV=2	3	3	3	1	3	3	3	9.2	9.2	9.2	71.606	620	620	0	16.352	ALQLEVDRLEELK;LQIPEEEREAVATIMSGSK;QAFAPFCAEDYTESLLQLHDAEIVR		3108;33200;40208	True;True;True	3364;36252;44623	40027;40028;40029;439161;533161	37230;37231;410106;497172	37230;410106;497172
509	sp|O43665|RGS10_HUMAN	sp|O43665|RGS10_HUMAN	Regulator of G-protein signaling 10 OS=Homo sapiens OX=9606 GN=RGS10 PE=1 SV=3	5	5	5	1	5	5	5	34.8	34.8	34.8	21.21	181	181	0	13.333	AKEIYMTFLSSK;ASSQVNVEGQSR;ILEEPHPLMFQK;LQDQIFNLMK;WAASLENLLEDPEGVKR		2429;4478;23526;33034;57235	True;True;True;True;True	2634;4884;25660;25661;36075;36076;63300	31140;31141;31142;31143;31144;58653;58654;58655;58656;58657;58658;58659;58660;58661;58662;308016;308017;308018;308019;308020;437238;437239;437240;437241;437242;437243;437244;760539;760540;760541;760542;760543	29066;29067;54676;54677;54678;54679;54680;287502;287503;287504;287505;408381;408382;408383;408384;408385;708919;708920;708921;708922	29066;54678;287502;408383;708920	700;701	126;138
510	sp|O43670|ZN207_HUMAN	sp|O43670|ZN207_HUMAN	BUB3-interacting and GLEBS motif-containing protein ZNF207 OS=Homo sapiens OX=9606 GN=ZNF207 PE=1 SV=1	5	5	5	1	5	5	5	12.3	12.3	12.3	50.75	478	478	0	64.377	DFDDEKILIQHQK;ETIDAVPNAIPGR;LIHPDEDISLEER;PAASITSKPATLTTTSATSK;PATLTTTSATSK		6800;12464;30455;39602;39674	True;True;True;True;True	7401;13587;33249;43978;44053	87868;87869;87870;158182;158183;158184;158185;158186;158187;158188;158189;158190;158191;158192;158193;158194;403500;403501;403502;403503;403504;403505;403506;403507;526388;526389;526390;526391;526392;526393;526394;526395;526396;526397;526398;526399;526400;526401;526402;526403;526404;527301;527302	82255;82256;147748;147749;147750;147751;147752;147753;147754;147755;147756;147757;147758;147759;147760;376632;376633;376634;376635;376636;491051;491052;491053;491054;491055;491056;491057;491058;491059;491060;491061;491062;491063;491064;491065;491066;491892	82255;147759;376636;491055;491892
511	sp|O43674|NDUB5_HUMAN	sp|O43674|NDUB5_HUMAN	NADH dehydrogenase [ubiquinone] 1 beta subcomplex subunit 5, mitochondrial OS=Homo sapiens OX=9606 GN=NDUFB5 PE=1 SV=1	6	6	6	1	6	6	6	27.5	27.5	27.5	21.75	189	189	0	12.972	ELIDHSPK;GDGPWYYYETIDKELIDHSPK;LFVIRPSR;NFYDSPEK;TMAVLQIEAEK;TMAVLQIEAEKAELR		11180;16329;29545;37588;50335;50336	True;True;True;True;True;True	12156;17853;32258;41736;55662;55663;55664	143186;143187;143188;143189;143190;143191;143192;143193;143194;208710;208711;390016;390017;390018;390019;390020;390021;390022;390023;390024;390025;390026;390027;390028;390029;390030;390031;390032;500538;500539;500540;500541;500542;500543;500544;500545;500546;500547;663919;663920;663921;663922;663923;663924;663925;663926;663927;663928;663929;663930;663931;663932;663933;663934;663935;663936;663937;…	133905;133906;133907;133908;133909;194489;194490;194491;363864;363865;363866;363867;363868;363869;363870;363871;363872;363873;363874;363875;363876;467107;467108;467109;467110;467111;467112;467113;467114;618766;618767;618768;618769;618770;618771;618772;618773;618774;618775;618776;618777;618778;618779;618780;618781;618782;618783;618784;618785;618786;618787;618788;618789;618790;618791;618792;618793;…	133905;194491;363873;467111;618766;618797	702	137
512	sp|O43676|NDUB3_HUMAN	sp|O43676|NDUB3_HUMAN	NADH dehydrogenase [ubiquinone] 1 beta subcomplex subunit 3 OS=Homo sapiens OX=9606 GN=NDUFB3 PE=1 SV=3	4	4	4	1	4	4	4	30.6	30.6	30.6	11.402	98	98	0	9.2423	GLRDPWGR;IEGTPLETIQK;IEGTPLETIQKK;SVSFSDVFFK		18043;22193;22194;47956	True;True;True;True	19688;24224;24225;53050	230526;230527;230528;230529;230530;230531;230532;230533;230534;230535;230536;289402;289403;289404;289405;289406;289407;289408;289409;289410;289411;289412;289413;289414;289415;289416;289417;289418;289419;289420;289421;289422;289423;289424;289425;289426;289427;289428;289429;289430;289431;289432;289433;289434;289435;289436;289437;289438;289439;289440;289441;289442;289443;289444;289445;289446;289447;…	214718;214719;214720;214721;214722;214723;214724;214725;214726;270194;270195;270196;270197;270198;270199;270200;270201;270202;270203;270204;270205;270206;270207;270208;270209;270210;270211;270212;270213;270214;270215;270216;270217;270218;270219;270220;270221;270222;270223;270224;270225;270226;270227;270228;270229;270230;270231;270232;588483;588484;588485;588486;588487;588488;588489;588490;588491;…	214718;270198;270223;588485
513	sp|O43678|NDUA2_HUMAN	sp|O43678|NDUA2_HUMAN	NADH dehydrogenase [ubiquinone] 1 alpha subcomplex subunit 2 OS=Homo sapiens OX=9606 GN=NDUFA2 PE=1 SV=3	4	4	4	1	4	4	4	42.4	42.4	42.4	10.921	99	99	0.00025374	6.3318	ALENVLSGKA;ANPDLPILIR;KANPDLPILIR;YAFGQETNVPLNNFSADQVTR		2725;3553;25897;57878	True;True;True;True	2956;3887;28298;63988	35199;35200;35201;35202;35203;35204;45773;45774;45775;45776;45777;45778;45779;45780;45781;45782;45783;45784;45785;45786;339577;339578;339579;339580;339581;339582;339583;339584;339585;768199;768200	32771;32772;32773;32774;32775;32776;42540;42541;42542;42543;42544;42545;42546;42547;42548;317031;317032;317033;317034;317035;317036;317037;317038;317039;716078	32772;42547;317037;716078
514	sp|O43681|GET3_HUMAN	sp|O43681|GET3_HUMAN	ATPase GET3 OS=Homo sapiens OX=9606 GN=GET3 PE=1 SV=2	11	11	11	1	11	11	11	47.4	47.4	47.4	38.792	348	348	0	147.95	ESVLIISTDPAHNISDAFDQK;GMNFSVVVFDTAPTGHTLR;GRESVLIISTDPAHNISDAFDQK;IDTHNIIVNQLVFPDPEKPCK;LEETLPVIR;LLNFPTIVER;LPLLPHEVR;NQISPFISQMCNMLGLGDMNADQLASK;TTCSCSLAVQLSK;VNTFSALLLEPYKPPSAQ;YLDQMEDLYEDFHIVK		12357;18197;18816;22068;28916;31652;32716;38809;51248;55287;58802	True;True;True;True;True;True;True;True;True;True;True	13471;19869;19870;20564;24094;31575;34539;35737;43100;56697;61180;64994;64995	157027;157028;157029;157030;157031;157032;157033;157034;157035;157036;157037;232891;232892;232893;232894;232895;232896;232897;232898;232899;232900;232901;232902;232903;232904;232905;232906;232907;232908;232909;241038;241039;241040;241041;241042;241043;241044;287795;287796;287797;287798;287799;287800;287801;287802;287803;287804;287805;287806;287807;287808;287809;287810;287811;287812;287813;287814;…	146650;146651;146652;146653;146654;146655;146656;146657;146658;146659;146660;217014;217015;217016;217017;217018;217019;217020;217021;217022;217023;217024;217025;217026;217027;217028;217029;217030;217031;224596;224597;224598;224599;224600;224601;224602;268693;268694;268695;268696;268697;268698;268699;268700;268701;268702;268703;268704;268705;268706;268707;268708;268709;268710;268711;268712;268713;…	146657;217026;224597;268701;356550;391588;404609;481438;629519;683897;728285	703;704	158;306
515	sp|O43684|BUB3_HUMAN	sp|O43684|BUB3_HUMAN	Mitotic checkpoint protein BUB3 OS=Homo sapiens OX=9606 GN=BUB3 PE=1 SV=1	14	14	14	1	14	14	14	50	50	50	37.154	328	328	0	291.19	FSPNTSQFLLVSSWDTSVR;LIVGTAGR;LKYQHTGAVLDCAFYDPTHAWSGGLDHQLK;LNQPPEDGISSVK;LYDVPANSMR;MHDLNTDQENLVGTHDAPIR;NMGYVQQR;QGYVLSSIEGR;RVLVWDLR;TPCNAGTFSQPEK;VAVEYLDPSPEVQK;VLVWDLR;VYTLSVSGDR;YQHTGAVLDCAFYDPTHAWSGGLDHQLK		15353;30677;30948;32440;35277;36046;38467;40922;43759;50532;52387;54988;57197;59285	True;True;True;True;True;True;True;True;True;True;True;True;True;True	16782;33501;33790;35438;38496;38497;39580;39581;42707;45403;48452;55909;57963;60799;63262;65539	195575;195576;195577;195578;195579;195580;195581;195582;195583;195584;195585;195586;195587;406519;406520;406521;406522;406523;406524;406525;406526;406527;406528;406529;406530;410489;410490;410491;429933;429934;429935;429936;429937;429938;429939;429940;429941;429942;429943;429944;429945;429946;429947;466229;466230;466231;466232;466233;466234;466235;466236;466237;466238;466239;466240;466241;477319;…	182311;182312;182313;182314;182315;182316;182317;182318;182319;182320;182321;182322;182323;379462;379463;379464;379465;379466;379467;379468;383096;383097;383098;401518;401519;401520;401521;401522;401523;401524;401525;401526;401527;401528;401529;401530;401531;435279;435280;435281;435282;435283;435284;435285;435286;435287;435288;435289;435290;445583;445584;445585;445586;445587;445588;445589;445590;…	182317;379467;383097;401531;435290;445602;477054;505097;538377;621535;645959;679574;708567;734255	705;706	49;81
516	sp|O43707|ACTN4_HUMAN	sp|O43707|ACTN4_HUMAN	Alpha-actinin-4 OS=Homo sapiens OX=9606 GN=ACTN4 PE=1 SV=2	83	83	55	1	83	83	55	84.7	84.7	64.7	104.85	911	911	0	323.31	AAPFNNWMESAMEDLQDMFIVHTIEEIEGLISAHDQFK;ACLISLGYDVENDR;ACLISLGYDVENDRQGEAEFNR;AGTQIENIDEDFR;AGTQIENIDEDFRDGLK;AIMTYVSSFYHAFSGAQK;ALDFIASK;ASFNHFDK;ASFNHFDKDHGGALGPEEFK;ASIHEAWTDGK;ASIHEAWTDGKEAMLK;CQLEINFNTLQTK;DDPVTNLNNAFEVAEK;DGLAFNALIHR;DHALLEEQSK;DHGGALGPEEFK;DLLLDPAWEK;DYETATLSDIK;EAILAIHK;EGLLLWCQR;ELPPDQAEYCIAR;ETTDTDTADQVIASFK;FAIQDISVEETSAK;GISQEQMQEFR;GYEEWLLNEIR;GYEEWLLNEIRR;HEAFESDLAAH…		432;704;705;1893;1894;2266;2614;4297;4298;4344;4345;6149;6696;7020;7139;7152;7814;9031;9305;10291;11358;12551;13229;17504;19702;19703;20011;20012;21058;21072;21254;21819;21820;24057;24846;25972;26439;27360;28179;28180;28556;28838;29114;32181;32182;33842;33843;33965;35030;35576;36245;36811;36927;36928;37523;37524;39386;39387;40683;40792;41194;41314;41315;42082;42824;43602;43676;44827;45514;47561;4…	True;True;True;True;True;True;True;True;True;True;True;True;True;True;True;True;True;True;True;True;True;True;True;True;True;True;True;True;True;True;True;True;True;True;True;True;True;True;True;True;True;True;True;True;True;True;True;True;True;True;True;True;True;True;True;True;True;True;True;True;True;True;True;True;True;True;True;True;True;True;True;True;True;True;True;True;True;True;True;True…	463;751;752;2049;2050;2456;2457;2833;4689;4690;4739;4740;4741;6702;7292;7646;7778;7794;8496;9839;10137;11203;12356;13682;14426;19121;19122;21521;21522;21853;21854;23001;23015;23217;23218;23825;23826;26278;26279;27145;27146;28384;28882;29894;30787;30788;31188;31495;31785;35131;35132;35133;36944;36945;37076;38230;38851;38852;39891;39892;40779;40780;40781;40973;40974;40975;41666;41667;43749;43750;45…	4809;8283;8284;8285;8286;8287;8288;8289;8290;8291;8292;8293;8294;8295;8296;8297;8298;8299;8300;8301;8302;8303;8304;8305;8306;8307;8308;8309;8310;8311;8312;8313;8314;8315;8316;8317;8318;8319;8320;8321;8322;8323;8324;8325;8326;8327;23347;23348;23349;23350;23351;23352;23353;23354;23355;23356;23357;23358;23359;23360;23361;23362;23363;23364;23365;23366;23367;23368;23369;23370;23371;23372;23373;23374;2…	4467;4468;7724;7725;7726;7727;7728;7729;7730;7731;7732;7733;7734;7735;7736;7737;7738;7739;7740;7741;7742;7743;7744;7745;7746;7747;7748;7749;7750;7751;7752;7753;7754;7755;7756;7757;7758;7759;7760;7761;7762;7763;21769;21770;21771;21772;21773;21774;21775;21776;21777;21778;21779;21780;21781;21782;21783;21784;21785;21786;21787;21788;21789;21790;21791;21792;21793;21794;21795;21796;21797;21798;21799;218…	4468;7732;7751;21775;21792;26982;31234;52315;52366;53267;53279;74330;81478;84833;86432;86723;94634;109171;112766;123794;135890;148911;157315;208951;235362;235403;238886;238893;254192;254349;258403;265965;265997;294659;304036;318257;324049;336277;347643;347700;352862;355892;358548;398242;398309;417414;417419;418983;432572;438841;448604;456581;458439;458464;466432;466447;488518;488555;502533;503602…	707;708;709;710;711;712;713;714;715;716;717;718;719;720	85;141;145;240;258;295;379;435;679;729;767;815;835;883
517	sp|O43708|MAAI_HUMAN	sp|O43708|MAAI_HUMAN	Maleylacetoacetate isomerase OS=Homo sapiens OX=9606 GN=GSTZ1 PE=1 SV=3	4	4	4	1	4	4	4	29.2	29.2	29.2	24.212	216	216	0	22.445	FKVDLTPYPTISSINK;LLVLEAFQVSHPCR;MISDLIAGGIQPLQNLSVLK;MQAGKPILYSYFR		14328;32034;36145;36571	True;True;True;True	15626;34945;39736;39737;40406;40407	182804;182805;424312;424313;424314;424315;424316;424317;424318;424319;424320;424321;424322;424323;424324;424325;479003;479004;479005;485793;485794;485795;485796;485797;485798;485799;485800;485801;485802;485803;485804;485805;485806;485807;485808;485809	170540;396251;396252;396253;396254;396255;396256;396257;396258;396259;396260;396261;396262;396263;396264;396265;447141;447142;453407;453408;453409;453410;453411;453412;453413;453414;453415;453416;453417;453418;453419;453420;453421;453422	170540;396258;447141;453420	721;722	1;101
519	sp|O43719|HTSF1_HUMAN	sp|O43719|HTSF1_HUMAN	17S U2 SnRNP complex component HTATSF1 OS=Homo sapiens OX=9606 GN=HTATSF1 PE=1 SV=1	3	3	3	1	3	3	3	4	4	4	85.852	755	755	0.0013061	3.3081	LHVEVAK;LLDEDEIR;LRGWEAFLNAPEANR		30268;31061;33567	True;True;True	33053;33907;36649	400926;400927;400928;400929;400930;400931;400932;400933;400934;400935;400936;411889;411890;411891;411892;411893;411894;411895;411896;411897;411898;411899;411900;411901;443786;443787;443788;443789;443790;443791;443792	374229;374230;374231;374232;374233;374234;374235;374236;374237;374238;384401;384402;384403;384404;384405;384406;384407;384408;384409;384410;384411;414387;414388;414389;414390;414391	374237;384410;414390
520	sp|O43731|ERD23_HUMAN	sp|O43731|ERD23_HUMAN	ER lumen protein-retaining receptor 3 OS=Homo sapiens OX=9606 GN=KDELR3 PE=1 SV=1	4	3	3	1	4	3	3	25.7	16.8	16.8	25.027	214	214	0.00023674	4.6855	ALYLANWIR;TFDSENDTFR;TGEAETITTHYLFFLGLYR;YLDLFTNFISIYNTVMK		3321;48968;49165;58793	True;True;False;True	3599;54171;54386;64985	43158;43159;43160;43161;43162;43163;43164;43165;43166;43167;43168;43169;43170;43171;43172;43173;43174;43175;43176;43177;43178;43179;43180;43181;43182;43183;43184;43185;43186;644916;644917;644918;644919;644920;644921;644922;644923;644924;644925;644926;644927;644928;644929;647642;647643;781115;781116;781117;781118;781119	40182;40183;40184;40185;40186;40187;40188;40189;40190;40191;40192;40193;40194;40195;40196;40197;40198;40199;40200;40201;40202;40203;40204;40205;40206;40207;40208;40209;600922;600923;600924;600925;600926;600927;600928;600929;600930;600931;600932;600933;600934;600935;603479;603480;728159;728160	40197;600926;603480;728160
521	sp|O43739|CYH3_HUMAN;sp|Q99418|CYH2_HUMAN;sp|Q15438|CYH1_HUMAN	sp|O43739|CYH3_HUMAN;sp|Q99418|CYH2_HUMAN;sp|Q15438|CYH1_HUMAN	Cytohesin-3 OS=Homo sapiens OX=9606 GN=CYTH3 PE=1 SV=2; Cytohesin-2 OS=Homo sapiens OX=9606 GN=CYTH2 PE=1 SV=2; Cytohesin-1 OS=Homo sapiens OX=9606 GN=CYTH1 PE=1 SV=1	3;3;2	3;3;2	2;2;1	3	3	3	2	8	8	6.2	46.348	400	400;400;398	0.00045882	4.1547	GIIPLENLSIR;GINEGGDLPEELLR;QFLWSFR		17400;17443;40737	True;True;True	19007;19052;45202	222516;222517;223368;223369;223370;223371;223372;539536;539537	207272;207273;208135;208136;208137;208138;503024;503025	207273;208135;503025
522	sp|O43741|AAKB2_HUMAN	sp|O43741|AAKB2_HUMAN	5-AMP-activated protein kinase subunit beta-2 OS=Homo sapiens OX=9606 GN=PRKAB2 PE=1 SV=1	4	3	3	1	4	3	3	27.6	23.9	23.9	30.302	272	272	0.00045424	3.9104	FFVDGQWVHDPSEPVVTSQLGTINNLIHVK;SHNDFVAILDLPEGEHQYK;SPPILPPHLLQVILNK;YVTTLLYKPI		13764;45234;46713;59695	True;True;True;False	15004;50058;51692;65973	175127;175128;595846;615639;615640;615641;615642;615643;615644;792629;792630;792631;792632;792633;792634	163448;163449;555179;573711;573712;573713;573714;573715;573716;738855;738856	163449;555179;573713;738855
523	sp|O43747|AP1G1_HUMAN	sp|O43747|AP1G1_HUMAN	AP-1 complex subunit gamma-1 OS=Homo sapiens OX=9606 GN=AP1G1 PE=1 SV=5	31	31	31	1	31	31	31	46.4	46.4	46.4	91.35	822	822	0	128.14	AALCAVHVIR;ADCASGIFLAAEK;AVEYNALFK;DDAVPNLIQLITNSVEMHAYTVQR;DLDVSIKR;ELLYFLDSCEPEFK;FTCTVNR;IEFTFER;IGYLGAMLLLDER;IKLTYNHK;KAALCAVHVIR;KLVPQLVR;KVPELMEMFLPATK;LLYMHMLGYPAHFGQLECLK;LVPQLVR;NDDDSSEAMNDILAQVATNTETSK;NHGVLHTSVVLLTEMCER;NLIMSGYSPEHDVSGISDPFLQVR;NVGNAILYETVLTIMDIK;QDVHLLMTNCIK;SPDMLAHFR;SSFREEDNTYR;STIVDCLKDLDVSIK;TFQLQLLSPSSSIVPAFNTGTITQVIK;TQAEEREMIQK;TVQTDHNAVQR;VLAINILGR;VLTTAGSYVR…		311;756;4995;6651;7617;11304;15430;22169;22809;23351;25809;26908;27517;32097;34958;37260;37719;38219;39293;40496;46582;47157;47531;49067;50793;51733;54203;54911;56897;57429;59609	True;True;True;True;True;True;True;True;True;True;True;True;True;True;True;True;True;True;True;True;True;True;True;True;True;True;True;True;True;True;True	331;808;5444;7238;7239;8291;12290;16864;24198;24887;25469;28203;29392;30057;35010;38152;41383;41877;42423;42424;43641;43642;44937;51550;52179;52581;54282;56201;57232;59951;60719;62940;63506;65880	3479;3480;3481;3482;3483;3484;3485;3486;3487;3488;3489;3490;3491;3492;3493;3494;3495;3496;3497;3498;3499;3500;3501;3502;3503;3504;3505;3506;3507;3508;3509;8880;8881;8882;8883;8884;65019;65020;65021;65022;65023;65024;65025;65026;65027;65028;65029;65030;65031;65032;65033;65034;65035;86090;86091;86092;86093;86094;86095;98547;144723;144724;144725;144726;144727;144728;144729;144730;144731;144732;14473…	3229;3230;3231;3232;3233;3234;3235;3236;3237;3238;3239;3240;3241;3242;3243;3244;3245;3246;3247;3248;3249;3250;3251;3252;3253;3254;3255;3256;3257;3258;8259;8260;60580;60581;60582;60583;60584;60585;60586;60587;60588;60589;60590;60591;60592;60593;80558;80559;80560;80561;92153;135299;135300;135301;135302;135303;135304;135305;135306;135307;135308;135309;135310;135311;135312;135313;183385;183386;183387…	3250;8260;60588;80560;92153;135308;183385;269881;277325;285303;316033;330067;338595;397109;431582;463284;468427;473991;487194;500586;572239;578715;583144;602103;624270;636336;669974;678728;705030;711412;737800	723;724;725;726	26;228;297;451
524	sp|O43752|STX6_HUMAN	sp|O43752|STX6_HUMAN	Syntaxin-6 OS=Homo sapiens OX=9606 GN=STX6 PE=1 SV=1	3	3	3	1	3	3	3	18.8	18.8	18.8	29.176	255	255	0	18.072	AVNTAQGLFQR;IGGELEEQAVMLEDFSHELESTQSR;KFNLDATELSIR		5177;22647;26232	True;True;True	5645;24711;28655	67674;67675;67676;67677;67678;67679;67680;67681;67682;67683;67684;295149;344402	63086;63087;63088;63089;63090;63091;63092;63093;63094;63095;275494;321526	63092;275494;321526
525	sp|O43759|SNG1_HUMAN	sp|O43759|SNG1_HUMAN	Synaptogyrin-1 OS=Homo sapiens OX=9606 GN=SYNGR1 PE=1 SV=2	3	3	3	1	3	3	3	13.3	13.3	13.3	25.455	233	233	0.00025988	6.9707	AGGAFDPYTLVR;DNPLNEGTDAAR;QPHTILR		1675;8138;41888	True;True;True	1811;8880;46460	20094;20095;20096;20097;20098;20099;20100;20101;20102;20103;20104;20105;20106;20107;20108;20109;20110;20111;105694;105695;105696;105697;105698;105699;105700;105701;105702;105703;105704;105705;105706;105707;105708;105709;105710;105711;105712;553167;553168;553169;553170;553171;553172	18694;18695;18696;18697;18698;18699;18700;18701;18702;18703;18704;18705;18706;18707;18708;18709;98985;98986;98987;98988;98989;98990;98991;98992;98993;98994;98995;98996;98997;98998;98999;99000;99001;99002;515613;515614	18704;98994;515614
526	sp|O43760|SNG2_HUMAN	sp|O43760|SNG2_HUMAN	Synaptogyrin-2 OS=Homo sapiens OX=9606 GN=SYNGR2 PE=1 SV=1	3	3	3	1	3	3	3	12.5	12.5	12.5	24.81	224	224	0.0002324	4.334	AGGSFDLR;DVLVGADSVR;FLTQPQVVAR		1701;8879;14674	True;True;True	1840;9672;16010	20470;20471;20472;20473;114994;114995;114996;114997;114998;114999;115000;115001;115002;115003;115004;115005;115006;115007;115008;115009;115010;115011;115012;187128;187129;187130;187131;187132;187133;187134;187135;187136;187137;187138;187139;187140;187141;187142;187143;187144;187145;187146;187147;187148;187149;187150;187151;187152	19041;19042;107704;107705;107706;107707;107708;107709;107710;107711;107712;107713;107714;107715;107716;107717;107718;107719;107720;174506;174507;174508;174509;174510;174511;174512;174513;174514;174515;174516;174517;174518;174519;174520;174521;174522;174523;174524;174525;174526;174527;174528;174529	19041;107716;174507
527	sp|O43765|SGTA_HUMAN	sp|O43765|SGTA_HUMAN	Small glutamine-rich tetratricopeptide repeat-containing protein alpha OS=Homo sapiens OX=9606 GN=SGTA PE=1 SV=1	11	11	11	1	11	11	11	39.3	39.3	39.3	34.063	313	313	0	33.692	AICIDPAYSK;AIELNPANAVYFCNR;ALELDPDNETYK;HVEAVAYYK;HVEAVAYYKK;LAYAIIQFLHDQLR;LGNYAGAVQDCER;MGLALSSLNK;SRTPSASNDDQQE;TPPSEEDSAEAER;VENFEAAVHFYGK		2092;2126;2705;21303;21304;28311;29923;35990;47068;50705;52921	True;True;True;True;True;True;True;True;True;True;True	2264;2301;2935;23268;23269;30929;32667;39490;39491;52083;56102;58531	26498;26499;26500;26501;26502;26503;26504;26505;26506;26507;26891;26892;26893;26894;34928;34929;34930;34931;34932;34933;34934;34935;34936;34937;34938;34939;34940;277292;277293;277294;277295;277296;277297;277298;277299;277300;277301;277302;277303;374775;374776;374777;374778;374779;374780;374781;374782;374783;374784;374785;374786;374787;374788;374789;374790;374791;374792;374793;374794;374795;374796…	24719;24720;24721;24722;24723;24724;24725;24726;24727;24728;25084;25085;25086;25087;32508;32509;32510;32511;32512;32513;32514;32515;32516;32517;32518;32519;32520;258932;258933;258934;258935;258936;258937;258938;258939;258940;258941;258942;349528;349529;349530;349531;349532;349533;349534;349535;349536;349537;349538;349539;349540;349541;349542;349543;349544;349545;349546;349547;349548;349549;349550…	24720;25084;32515;258932;258941;349536;369694;444821;577795;623436;652073	727	165
529	sp|O43772|MCAT_HUMAN	sp|O43772|MCAT_HUMAN	Mitochondrial carnitine/acylcarnitine carrier protein OS=Homo sapiens OX=9606 GN=SLC25A20 PE=1 SV=1	12	12	12	1	12	12	12	47.2	47.2	47.2	32.943	301	301	0	40.112	ADQPKPISPLK;CLLQIQASSGESK;EGITGLYR;ELIRDEGVTSLYK;FLNWATPNL;GFNAVMIR;GTVLTLMR;LQTQPPSLPGQPPMYSGTFDCFRK;LYQEFGIR;NIFTPEGK;NLLAGGFGGVCLVFVGHPLDTVK;YTGTLDCAK		935;5983;10253;11199;14563;16838;19320;33432;35411;37828;38235;59550	True;True;True;True;True;True;True;True;True;True;True;True	1012;6513;11164;12176;15883;18398;21097;36509;38641;41996;42440;65817	10969;10970;10971;10972;10973;10974;10975;10976;10977;10978;77596;77597;77598;77599;131797;131798;143354;143355;143356;143357;143358;143359;143360;143361;143362;143363;143364;143365;143366;143367;143368;143369;143370;143371;143372;143373;185801;215263;215264;215265;215266;215267;215268;215269;215270;215271;215272;215273;215274;215275;215276;215277;215278;215279;215280;247018;442282;467639;467640;…	10156;10157;10158;10159;10160;10161;10162;72337;72338;72339;72340;123473;123474;134057;134058;134059;134060;134061;134062;134063;134064;134065;134066;134067;134068;134069;134070;134071;134072;134073;134074;134075;173290;200569;200570;200571;200572;200573;200574;200575;200576;200577;200578;200579;200580;200581;200582;200583;200584;230044;412991;436550;436551;436552;436553;436554;436555;436556;4365…	10158;72338;123473;134062;173290;200579;230044;412991;436556;469636;474091;737083	728	177
530	sp|O43776|SYNC_HUMAN	sp|O43776|SYNC_HUMAN	Asparagine--tRNA ligase, cytoplasmic OS=Homo sapiens OX=9606 GN=NARS1 PE=1 SV=1	25	25	24	1	25	25	24	52.7	52.7	51.3	62.942	548	548	0	323.31	ALMTVGKEPFPTIYVDSQK;CFRDHFFDR;EAEDSLRR;EGIDPTPYYWYTDQR;EGIDPTPYYWYTDQRK;EPFPTIYVDSQK;EPFPTIYVDSQKENER;FLTWILNR;GYYEVTPPTLVQTQVEGGATLFK;HLAEYTHVEAECPFLTFDDLLNR;IFDSEEILAGYK;IFDSEEILAGYKR;IGALEGYR;ITIKNDPSLPEPK;KEDGTFYEFGEDIPEAPER;LEDLVCDVVDR;LMTDTINEPILLCR;LTESVDVLMPNVGEIVGGSMR;MNYSDAIVWLK;NLMFLVLR;SPAGSIVHELNPNFQPPK;VFGWVHR;VLAELYVSDR;VLAELYVSDREGSDATGDGTK;YGTCPHGGYGLGLER		3012;5772;9202;10231;10232;11825;11826;14678;19836;20543;22366;22367;22574;25164;26057;28854;32224;34269;36526;38288;46557;53121;54189;54190;58480	True;True;True;True;True;True;True;True;True;True;True;True;True;True;True;True;True;True;True;True;True;True;True;True;True	3264;6288;10027;11140;11141;12892;12893;16016;21667;22423;24410;24411;24632;27512;28475;31512;35196;35197;37406;37407;40337;40338;42499;42500;51525;58746;59935;59936;64651	38991;75233;75234;118892;118893;118894;131502;131503;131504;131505;131506;131507;131508;131509;131510;131511;131512;131513;131514;131515;131516;131517;131518;131519;131520;131521;131522;131523;131524;131525;131526;150851;150852;150853;150854;150855;150856;150857;150858;150859;150860;150861;150862;150863;150864;150865;150866;150867;150868;150869;187187;187188;187189;187190;187191;187192;187193;187…	36284;70169;111357;111358;111359;123187;123188;123189;123190;123191;123192;123193;123194;123195;123196;123197;123198;123199;123200;123201;123202;123203;123204;123205;123206;123207;123208;123209;123210;123211;140969;140970;140971;140972;140973;140974;140975;140976;140977;140978;140979;140980;140981;140982;140983;140984;140985;140986;140987;174553;174554;174555;174556;174557;174558;174559;174560;17…	36284;70169;111357;123187;123211;140969;140973;174556;237195;246580;272143;272164;274594;307998;319343;355996;398773;422399;452401;474655;571820;654663;669833;669841;723705	729;730;731;732	145;391;427;477
531	sp|O43795|MYO1B_HUMAN	sp|O43795|MYO1B_HUMAN	Unconventional myosin-Ib OS=Homo sapiens OX=9606 GN=MYO1B PE=1 SV=3	48	48	45	1	48	48	45	47.4	47.4	44.1	131.98	1136	1136	0	323.31	AAHIFNEALVCHQIR;ALYPSSVGQPFQGAYLEINK;ALYPSSVGQPFQGAYLEINKNPK;ASVATLMK;DQFTDQQK;EAVTTIAAYWHGTQAR;EICELTGIDQSVLER;EQLLQSNPVLEAFGNAK;FDHSEIYTYIGSVVISVNPYR;FLNDTSLPHSCFR;GDFLFSSDHLIEMATK;GDPLGGVISNYLLEK;IFLLTNNNLLLADQK;IIIAEVVNK;IYEFTLQR;KIYEFTLQR;KSQIVIAAWYR;LEASELFK;LEDLATLIQK;LFSWLVNR;LGNIEFKPESR;LIYEEKLEASELFK;LNQVCATHQHFESR;LVMSYVAAVCGK;MPSLSPIDK;NAMQIVGFMDHEAESVLAVVAAVLK;NFHVFYQLLSGASEELLNK;NFY…		266;3327;3328;4503;8303;9547;10562;11995;13439;14549;16323;16393;22431;23085;25689;26605;27320;28816;28845;29505;29910;30694;32448;34901;36564;37137;37514;37589;39481;42132;42904;43099;43542;44650;45143;45838;46105;46106;46898;47086;49383;55011;55177;56067;56139;58856;59154;59342	True;True;True;True;True;True;True;True;True;True;True;True;True;True;True;True;True;True;True;True;True;True;True;True;True;True;True;True;True;True;True;True;True;True;True;True;True;True;True;True;True;True;True;True;True;True;True;True	280;3605;3606;4910;4911;9061;10401;11503;13071;14653;15865;17845;17846;17919;24479;25186;28075;29064;29850;31472;31502;32214;32654;33519;35446;38092;40398;41244;41657;41737;43851;46717;47545;47749;48219;49414;49957;50711;51001;51002;51900;52102;54619;60825;61056;62034;62035;62112;65055;65397;65599	2823;2824;2825;2826;2827;2828;2829;2830;2831;2832;2833;2834;2835;2836;2837;2838;2839;2840;2841;2842;2843;2844;2845;2846;2847;2848;2849;43228;43229;43230;43231;43232;43233;43234;43235;43236;43237;43238;58843;58844;58845;58846;58847;58848;58849;107834;123303;123304;135770;135771;135772;135773;135774;135775;135776;135777;135778;135779;135780;135781;135782;135783;152729;152730;152731;152732;152733;15…	2601;2602;2603;2604;2605;2606;2607;2608;2609;2610;2611;2612;2613;2614;2615;2616;2617;2618;2619;2620;2621;2622;2623;2624;40248;40249;40250;40251;40252;40253;40254;40255;40256;54840;54841;54842;54843;54844;54845;54846;101016;115491;115492;127133;127134;127135;127136;127137;127138;127139;127140;127141;127142;127143;127144;127145;127146;142668;142669;142670;142671;142672;142673;142674;142675;142676;1…	2619;40248;40254;54845;101016;115492;127139;142687;160035;173093;194402;195122;272928;281177;314309;326303;335778;355634;355938;362841;369593;379563;401578;430338;453363;461668;466294;467126;489662;518292;527199;530687;535628;548102;553783;562524;566688;566698;575893;577897;606364;679804;682390;694133;694938;728816;732662;734833	733;734;735;736;737;738	122;258;264;582;1039;1073
532	sp|O43805|SSNA1_HUMAN	sp|O43805|SSNA1_HUMAN	Microtubule nucleation factor SSNA1 OS=Homo sapiens OX=9606 GN=SSNA1 PE=1 SV=2	2	2	2	1	2	2	2	11.8	11.8	11.8	13.596	119	119	0.00045506	3.9397	ILESSQTLLSVLK;ILESSQTLLSVLKR		23556;23557	True;True	25692;25693	308434;308435;308436;308437;308438;308439;308440;308441	287879;287880;287881;287882;287883;287884	287881;287883
533	sp|O43808|PM34_HUMAN	sp|O43808|PM34_HUMAN	Peroxisomal membrane protein PMP34 OS=Homo sapiens OX=9606 GN=SLC25A17 PE=1 SV=1	3	3	3	1	3	3	3	12.4	12.4	12.4	34.566	307	307	0.004898	2.5486	AIATTVTYPLQTVQSILR;GIIDAFHQIIR;NILYLLHQR		2085;17390;37900	True;True;True	2256;18997;42072	26393;26394;222397;222398;504176;504177;504178;504179;504180;504181	24616;24617;207168;470416;470417	24616;207168;470417
534	sp|O43809|CPSF5_HUMAN	sp|O43809|CPSF5_HUMAN	Cleavage and polyadenylation specificity factor subunit 5 OS=Homo sapiens OX=9606 GN=NUDT21 PE=1 SV=1	13	13	13	1	13	13	13	57.3	57.3	57.3	26.227	227	227	0	73.085	EPLYEKDSSVAAR;GVTQFGNK;KLFLVQLQEK;LFLVQLQEK;LMTEILGR;LPGGELNPGEDEVEGLK;LPGGELNPGEDEVEGLKR;LPHVLLLQLGTTFFK;PNFEPPQYPYIPAHITKPK;TINLYPLTNYTFGTK;TINLYPLTNYTFGTKEPLYEK;TVEGVLIVHEHR;YIQQTKPLTLER		11850;19581;26724;29393;32225;32641;32642;32668;39963;49633;49634;51528;58671	True;True;True;True;True;True;True;True;True;True;True;True;True	12918;21394;29191;32085;35198;35658;35659;35686;44358;54895;54896;57005;64858	151070;151071;151072;151073;251035;251036;251037;251038;251039;251040;251041;351553;351554;351555;351556;351557;351558;351559;351560;351561;351562;351563;351564;351565;351566;351567;351568;351569;351570;351571;351572;351573;351574;351575;351576;351577;387763;387764;387765;387766;387767;387768;387769;387770;387771;387772;387773;387774;387775;387776;387777;387778;427009;427010;427011;427012;427013;…	141164;233846;233847;233848;233849;233850;233851;233852;328096;328097;328098;328099;328100;328101;328102;328103;328104;328105;328106;328107;328108;328109;328110;328111;328112;328113;328114;328115;328116;328117;328118;361674;361675;361676;361677;361678;361679;361680;361681;361682;361683;361684;361685;361686;361687;361688;361689;398795;398796;398797;398798;398799;398800;398801;398802;398803;398804;…	141164;233852;328099;361674;398798;403803;403813;404058;494577;610414;610434;633174;726532
535	sp|O43813|LANC1_HUMAN	sp|O43813|LANC1_HUMAN	Glutathione S-transferase LANCL1 OS=Homo sapiens OX=9606 GN=LANCL1 PE=1 SV=1	13	13	13	1	13	13	13	47.9	47.9	47.9	45.283	399	399	0	58.977	AFPNPYADYNK;DLLVHWCHGAPGVIYMLIQAYK;ELLQQMER;FAEWCLEYGEHGCR;GYGLCHGSAGNAYAFLTLYNLTQDMK;IDPHAPNEMLYGR;IGYIYALLFVNK;IGYIYALLFVNKNFGVEK;IPQSHIQQICETILTSGENLAR;LHSLVKPSVDYVCQLK;QAEDCITR;SITFLCGDAGPLAVAAVLYHK;SLAEGYFDAAGR		1489;7838;11281;13195;19736;22016;22807;22808;24354;30254;40184;45493;45651	True;True;True;True;True;True;True;True;True;True;True;True;True	1608;8521;12261;14390;21559;24040;24885;24886;26610;33039;44597;50343;50510	17515;17516;101379;101380;144516;144517;144518;144519;144520;144521;167678;167679;167680;167681;167682;253123;253124;253125;253126;287305;287306;287307;287308;287309;287310;287311;287312;287313;287314;287315;287316;297153;297154;297155;297156;297157;297158;297159;297160;297161;297162;297163;297164;297165;297166;297167;319157;319158;319159;319160;319161;319162;319163;319164;319165;319166;319167;31…	16256;16257;94799;135125;135126;135127;135128;135129;135130;156532;156533;156534;156535;235784;235785;235786;235787;268258;268259;268260;268261;268262;268263;268264;268265;268266;268267;268268;277309;277310;277311;277312;277313;277314;277315;277316;277317;277318;277319;277320;277321;277322;297847;297848;297849;297850;297851;297852;297853;297854;297855;297856;297857;297858;297859;297860;297861;373…	16256;94799;135126;156533;235784;268258;277309;277322;297847;373959;496953;558222;560666
536	sp|O43815|STRN_HUMAN	sp|O43815|STRN_HUMAN	Striatin OS=Homo sapiens OX=9606 GN=STRN PE=1 SV=4	14	14	13	1	14	14	13	27.8	27.8	26.5	86.131	780	780	0	142.08	ALAFHPIEPVLITASEDHTLK;AQYSLPGILHFLQHEWAR;DVDELPSLQPSVGSPSRPSSSR;ELGIPASVDLVSSDPSHMVASFSK;FYDNNTGK;GPLLGHTDAVWGLAYSAAHQR;LLSCSADGTLR;LWNTTEVAPALSVFNDTK;MLEYALKQER;SELTDSASVLDNFK;STSLDVEPIYTFR;SVIDTSTIVR;TCIQEFTAHR;VISHPTLPISITAHEDR		2531;4150;8776;11138;15798;18482;31862;35212;36269;44558;47639;47821;48541;53993	True;True;True;True;True;True;True;True;True;True;True;True;True;True	2747;4529;9560;12114;17267;20194;34759;38431;39931;49311;52701;52900;53703;59716	32454;32455;32456;32457;32458;32459;32460;32461;32462;32463;32464;32465;32466;32467;54388;54389;54390;54391;54392;54393;54394;54395;54396;54397;54398;113745;113746;113747;142761;201514;201515;236938;236939;236940;236941;236942;236943;422320;422321;422322;422323;422324;422325;422326;422327;422328;465739;465740;465741;465742;465743;465744;465745;465746;465747;465748;465749;465750;465751;480974;5872…	30238;30239;30240;30241;30242;30243;30244;30245;30246;30247;30248;50799;50800;50801;50802;50803;50804;50805;50806;50807;106559;106560;106561;133540;187813;220801;220802;220803;220804;220805;220806;394413;394414;394415;394416;394417;394418;394419;434839;434840;434841;434842;434843;434844;434845;434846;434847;434848;434849;434850;434851;448901;547213;547214;547215;547216;547217;547218;584476;584477…	30240;50805;106559;133540;187813;220804;394417;434845;448901;547214;584478;586718;595980;667261
537	sp|O43818|U3IP2_HUMAN	sp|O43818|U3IP2_HUMAN	U3 small nucleolar RNA-interacting protein 2 OS=Homo sapiens OX=9606 GN=RRP9 PE=1 SV=1	5	5	5	1	5	5	5	12.4	12.4	12.4	51.84	475	475	0	13.806	EIQAPASADIR;GTHQLYSTSHDR;LWQCGEGFR;NSVCIIPLR;QLDLLCDIPLVGFINSLK		10723;19227;35213;39054;41301	True;True;True;True;True	11674;20999;38432;43375;45809	137533;137534;137535;137536;137537;245907;245908;245909;245910;245911;465752;465753;465754;519182;519183;519184;519185;519186;519187;519188;546661;546662;546663;546664;546665	128708;128709;128710;229022;229023;229024;229025;434852;484369;484370;484371;484372;484373;509595;509596;509597	128710;229024;434852;484370;509597
538	sp|O43837|IDH3B_HUMAN	sp|O43837|IDH3B_HUMAN	Isocitrate dehydrogenase [NAD] subunit beta, mitochondrial OS=Homo sapiens OX=9606 GN=IDH3B PE=1 SV=2	15	15	15	1	15	15	15	50.6	50.6	50.6	42.183	385	385	0	75.946	AAAVPVEFQEHHLSEVQNMASEEKLEQVLSSMK;DMGGYSTTTDFIK;EQTEGEYSSLEHESAR;FAFDYATK;FAFDYATKK;HLNLEYHSSMIADAVK;HNNLDLVIIR;HPFAQAVGR;IHTPMEYK;KLDLFANVVHVK;LDLFANVVHVK;LGDGLFLQCCEEVAELYPK;NIANPTAMLLSASNMLR;SVIGHLQTK;VEGSFPVTMLPGDGVGPELMHAVK		111;8027;12053;13198;13199;20694;20873;20921;22918;26650;28606;29637;37774;47826;52865	True;True;True;True;True;True;True;True;True;True;True;True;True;True;True	119;8742;13138;14393;14394;22593;22799;22853;25003;29114;31242;32355;41939;52905;58470	1236;1237;1238;104207;104208;104209;104210;104211;104212;104213;104214;104215;104216;104217;153541;153542;153543;153544;153545;153546;153547;153548;167696;167697;167698;167699;167700;266770;269528;269529;269530;269531;269532;269533;269534;269535;269536;269537;269538;269539;270270;270271;270272;270273;270274;270275;270276;270277;270278;270279;270280;270281;270282;270283;270284;298827;350415;350416…	1171;1172;1173;97544;97545;97546;97547;97548;97549;97550;97551;97552;97553;143448;143449;143450;143451;143452;143453;156543;156544;156545;156546;248602;251272;251273;251274;251275;251276;251277;251278;251279;251280;251281;251282;251283;251968;251969;251970;251971;251972;251973;251974;251975;251976;251977;251978;251979;251980;251981;251982;278886;327057;327058;327059;327060;327061;327062;327063;32…	1173;97547;143452;156543;156546;248602;251274;251974;278886;327064;353464;365041;468967;586787;651301
539	sp|O43847|NRDC_HUMAN	sp|O43847|NRDC_HUMAN	Nardilysin OS=Homo sapiens OX=9606 GN=NRDC PE=1 SV=3	39	39	39	1	39	39	39	35	35	35	131.7	1151	1151	0	166.17	AFDCPETEYPVK;AFTTTLNLLPYHK;ALNKGDANSEVTVYYQSGTR;ANLVLLSGANEGK;DAIDREVEAVDSEYQLAR;EMLFGSLAR;ETLDTLEK;EVEAVDSEYQLAR;FFWGNAETLK;FHLISPLIQK;GSILSFLR;GSLSNAGDPEIVK;IEEFLSSFEEK;IHALTITWALPPQQQHYR;IVNTPQGCLWYK;LAHEIEALK;LGADESEEEGR;LGADESEEEGRR;LLILEYAR;LQNGLQALLISDLSNMEGK;LREFWMR;LVAGEHGLIIR;MLSVHVVGYGK;PNFGHLTDPFDTPAFNK;QTLGYHVYPTCR;SDLVNWFK;TKQTLGYHVYPTCR;TVFQFDVQR;TYFNILIKPETLAK;VKPLHYISWLVGHEGK;WAQ…		1353;1539;3026;3538;6476;11603;12480;12676;13775;14026;18965;19013;22144;22824;25507;27926;29582;29583;31448;33286;33530;34606;36379;39964;42333;44309;49795;51572;51905;54135;57260;57783;57784;58588;59136;59137;59162;59163;59806	True;True;True;True;True;True;True;True;True;True;True;True;True;True;True;True;True;True;True;True;True;True;True;True;True;True;True;True;True;True;True;True;True;True;True;True;True;True;True	1459;1660;3279;3872;7050;12631;12632;13604;13817;15017;15296;20721;20771;24173;24904;27884;30504;32297;32298;34316;36348;36349;36610;37775;40102;44359;46931;49042;55074;57053;57416;59881;63327;63328;63887;63888;64768;65377;65378;65405;65406;66088	15575;15576;15577;15578;15579;15580;15581;15582;15583;15584;15585;18112;18113;18114;18115;18116;18117;18118;18119;18120;18121;18122;18123;18124;18125;18126;18127;18128;18129;18130;18131;18132;18133;18134;18135;18136;18137;18138;18139;18140;18141;18142;18143;18144;18145;18146;18147;18148;18149;18150;18151;18152;18153;18154;18155;39136;39137;45621;45622;45623;45624;45625;45626;45627;45628;45629;456…	14429;14430;14431;14432;14433;14434;14435;14436;14437;16809;16810;16811;16812;16813;16814;16815;16816;16817;16818;16819;16820;16821;16822;16823;16824;16825;16826;16827;16828;16829;16830;16831;16832;16833;16834;16835;16836;16837;16838;16839;16840;16841;16842;16843;16844;16845;16846;16847;16848;16849;16850;16851;16852;16853;16854;36411;42398;42399;42400;42401;42402;42403;42404;42405;42406;42407;424…	14434;16810;36411;42408;78468;138640;147868;150325;163589;166927;226284;226728;269658;277627;312149;344417;364486;364495;389153;411196;413988;426554;450453;494594;520462;544150;612710;633854;638611;669240;709235;715278;715281;725313;732480;732487;732714;732719;739968	739;740	133;299
540	sp|O43852|CALU_HUMAN	sp|O43852|CALU_HUMAN	Calumenin OS=Homo sapiens OX=9606 GN=CALU PE=1 SV=2	22	22	22	1	22	22	22	70.5	70.5	70.5	37.106	315	315	0	323.31	DIVVQETMEDIDK;DRVHHEPQLSDK;DWILPSDYDHAEAEAR;EEFTAFLHPEEYDYMK;EEFTAFLHPEEYDYMKDIVVQETMEDIDK;EEIVDKYDLFVGSQATDFGEALVR;EQFVEFR;EQFVEFRDK;GHDLNEDGLVSWEEYK;HLVYESDQNK;HLVYESDQNKDGK;IDGDKDGFVTVDELK;MADKDGDLIATK;NADGFIDLEEYIGDMYSHDGNTDEPEWVK;RWIYEDVER;TEREQFVEFR;TFDQLTPEESK;TFDQLTPEESKER;VHHEPQLSDK;VHHEPQLSDKVHNDAQSFDYDHDAFLGAEEAK;VHNDAQSFDYDHDAFLGAEEAK;WIYEDVER		7428;8438;8988;9814;9815;9855;11944;11945;17187;20792;20793;21945;35508;37032;43802;48897;48966;48967;53625;53626;53659;57484	True;True;True;True;True;True;True;True;True;True;True;True;True;True;True;True;True;True;True;True;True;True	8086;9203;9793;10692;10693;10694;10736;13016;13017;18769;22698;22699;23962;38741;38742;41131;48496;54096;54169;54170;59300;59301;59336;63564	96217;96218;109260;109261;109262;109263;109264;109265;109266;109267;109268;109269;109270;109271;109272;109273;109274;109275;109276;109277;109278;109279;109280;109281;109282;116172;116173;116174;116175;116176;116177;116178;116179;116180;116181;116182;116183;116184;116185;116186;116187;116188;116189;116190;116191;116192;116193;116194;126948;126949;126950;126951;126952;126953;126954;126955;126956;12…	90003;90004;102333;102334;102335;102336;102337;102338;102339;102340;102341;102342;102343;102344;102345;102346;102347;102348;102349;102350;102351;108798;108799;108800;108801;108802;108803;108804;108805;108806;108807;108808;108809;108810;108811;108812;108813;108814;108815;108816;118998;118999;119000;119001;119002;119003;119004;119005;119006;119007;119008;119009;119010;119011;119012;119013;119014;11…	90004;102350;108812;119021;119028;119383;142089;142093;204538;250244;250250;267382;437687;460303;538701;600032;600897;600915;661278;661294;661969;711921	741;742	162;188
541	sp|O43865|SAHH2_HUMAN;sp|Q96HN2|SAHH3_HUMAN	sp|O43865|SAHH2_HUMAN	S-adenosylhomocysteine hydrolase-like protein 1 OS=Homo sapiens OX=9606 GN=AHCYL1 PE=1 SV=2	11;5	11;5	11;5	2	11	11	11	29.1	29.1	29.1	58.951	530	530;611	0	84.966	EIEIAEQDMSALISLR;GIVEESVTGVHR;GSSNFCVK;IVGCTHITAQTAVLIETLCALGAQCR;KMDEYVASLHLPSFDAHLTELTDDQAK;LCVPAMNVNDSVTK;QVDVVITCTGNK;SQVDHVIWPDGKR;TPELTWER;VVLLAEGR;YKQDVYLLPK		10585;17528;19078;25415;26937;28434;42430;46991;50566;56761;58743	True;True;True;True;True;True;True;True;True;True;True	11526;19148;20842;27786;29426;31058;47034;51999;55944;62790;64932	136005;136006;136007;224580;224581;224582;224583;224584;224585;224586;224587;224588;224589;224590;224591;224592;224593;224594;224595;224596;224597;224598;224599;224600;224601;224602;244209;244210;333266;333267;333268;333269;333270;333271;333272;354317;376201;376202;376203;559892;559893;559894;559895;559896;559897;559898;559899;559900;559901;559902;618984;667189;667190;667191;754591;754592;754593;…	127331;209268;209269;209270;209271;209272;209273;209274;209275;209276;209277;209278;209279;209280;209281;209282;209283;209284;227500;227501;311119;311120;311121;311122;311123;311124;330537;350907;350908;521779;521780;521781;521782;521783;521784;521785;521786;521787;521788;576802;621889;621890;621891;703467;703468;703469;727376;727377;727378;727379;727380;727381;727382;727383;727384;727385;727386;…	127331;209274;227500;311119;330537;350908;521779;576802;621891;703467;727381
542	sp|O43896|KIF1C_HUMAN	sp|O43896|KIF1C_HUMAN	Kinesin-like protein KIF1C OS=Homo sapiens OX=9606 GN=KIF1C PE=1 SV=3	8	8	5	1	8	8	5	9.2	9.2	6.5	122.95	1103	1103	0	15.702	AEIEALAALK;DSVLTWLLK;ELLEQQGIDIK;FNHPEQAR;GVPPPPGPPSEPVDWNFAQK;LVTEPLVLK;TAMIAALSPADINYEETLSTLR;TVAATNMNETSSR		1107;8617;11240;14824;19528;35065;48397;51459	True;True;True;True;True;True;True;True	1192;9393;12218;16204;21339;38269;53541;56936	13083;13084;111392;111393;111394;111395;144028;144029;189331;189332;189333;250355;463953;463954;463955;463956;463957;463958;463959;463960;463961;463962;463963;637367;678501;678502;678503;678504;678505;678506;678507;678508;678509	12159;12160;104297;104298;104299;134673;134674;134675;176568;176569;176570;233220;433176;433177;433178;433179;433180;433181;433182;433183;433184;433185;433186;593895;632465;632466;632467;632468;632469;632470	12159;104298;134673;176568;233220;433181;593895;632465	743	210
543	sp|O43913|ORC5_HUMAN	sp|O43913|ORC5_HUMAN	Origin recognition complex subunit 5 OS=Homo sapiens OX=9606 GN=ORC5 PE=1 SV=1	3	3	3	1	3	3	3	8	8	8	50.282	435	435	0.00024219	5.2132	ESQVSILQSLFGER;LLAILYSIVDSR;LLLEQILNK		12317;30986;31531	True;True;True	13425;33828;34405	156250;410953;410954;417666;417667;417668;417669;417670	145902;383518;383519;389849;389850;389851;389852;389853	145902;383519;389852
544	sp|O43920|NDUS5_HUMAN	sp|O43920|NDUS5_HUMAN	NADH dehydrogenase [ubiquinone] iron-sulfur protein 5 OS=Homo sapiens OX=9606 GN=NDUFS5 PE=1 SV=3	6	6	6	1	6	6	6	47.2	47.2	47.2	12.517	106	106	0	17.479	EWIECAHGIGYTR;FGLNIDR;PFLDIQK;PFLDIQKR;WLTIQSGEQPYK;YTPPPHHIGK		12996;13894;39726;39727;57564;59576	True;True;True;True;True;True	14176;15150;44106;44107;63652;65846	165113;165114;165115;165116;165117;165118;165119;165120;165121;165122;165123;176908;527899;527900;527901;527902;527903;527904;527905;527906;527907;527908;527909;527910;527911;527912;527913;527914;527915;527916;527917;527918;764944;764945;764946;764947;764948;764949;764950;764951;764952;764953;764954;764955;764956;764957;764958;764959;764960;790950;790951;790952;790953;790954;790955;790956;790957;…	154133;154134;154135;154136;154137;154138;154139;154140;154141;165063;492440;492441;492442;492443;492444;492445;492446;492447;492448;492449;492450;492451;492452;492453;492454;492455;492456;492457;492458;492459;713088;713089;713090;713091;713092;713093;713094;713095;713096;713097;713098;713099;713100;713101;713102;713103;713104;713105;737278;737279;737280;737281;737282;737283;737284;737285;737286;…	154140;165063;492440;492444;713088;737283
545	sp|O43924|PDE6D_HUMAN	sp|O43924|PDE6D_HUMAN	Retinal rod rhodopsin-sensitive cGMP 3,5-cyclic phosphodiesterase subunit delta OS=Homo sapiens OX=9606 GN=PDE6D PE=1 SV=1	2	2	2	1	2	2	2	20.7	20.7	20.7	17.42	150	150	0.0039534	2.7632	ELNFSSTEQMEK;ILWQGTEDLSVPGVEHEAR		11321;23951	True;True	12313;26126	144903;144904;144905;144906;313881;313882;313883;313884;313885	135458;292932;292933;292934	135458;292933	744	71
546	sp|O43929|ORC4_HUMAN	sp|O43929|ORC4_HUMAN	Origin recognition complex subunit 4 OS=Homo sapiens OX=9606 GN=ORC4 PE=1 SV=2	4	4	1	1	4	4	1	8.7	8.7	1.8	50.377	436	436	0.00024237	5.2369	HLSELLKR;LDILELLEK;LDILELLEKR;TSSCPVIFILDEFDLFAHHK		20737;28575;28576;51171	True;True;True;True	22640;31210;31211;56612	267204;378361;378362;378363;378364;378365;674501;674502;674503	248981;353131;353132;353133;353134;628679;628680;628681	248981;353133;353134;628680
547	sp|O60216|RAD21_HUMAN	sp|O60216|RAD21_HUMAN	Double-strand-break repair protein rad21 homolog OS=Homo sapiens OX=9606 GN=RAD21 PE=1 SV=2	10	10	8	1	10	10	8	21.6	21.6	18.5	71.689	631	631	0	23.616	AHVFECNLESSVESIISPK;AQLSDYSDIVTTLDLAPPTKK;CLTPLVPEDLR;DVIDEPIIEEPSR;FYSFLVLK;LFSLPAQPLWNNR;MAFRPGVVDLPEENR;TGAESISLLELCR;TSGHLLLGVVR;YLLADCNEAFIK		2049;4027;6018;8844;15870;29494;35525;49133;51060;58882	True;True;True;True;True;True;True;True;True;True	2218;4397;6551;9635;17345;32200;38762;54353;56486;65082	25813;25814;25815;52802;77951;77952;77953;77954;77955;77956;77957;77958;77959;77960;77961;114514;114515;114516;114517;114518;114519;202561;202562;202563;202564;202565;388933;388934;388935;388936;388937;388938;469000;469001;469002;469003;469004;469005;469006;647275;647276;647277;647278;647279;647280;647281;647282;647283;647284;672942;672943;672944;672945;672946;672947;672948;672949;672950;672951;6…	24075;24076;49319;72669;72670;72671;72672;72673;72674;72675;72676;72677;107246;107247;107248;107249;107250;188780;188781;188782;362739;362740;362741;362742;362743;437802;437803;437804;437805;603141;603142;603143;603144;603145;603146;603147;603148;627268;627269;627270;627271;627272;627273;627274;627275;627276;627277;627278;627279;729181;729182;729183;729184;729185;729186;729187	24075;49319;72676;107247;188782;362741;437803;603142;627269;729187
549	sp|O60231|DHX16_HUMAN	sp|O60231|DHX16_HUMAN	Pre-mRNA-splicing factor ATP-dependent RNA helicase DHX16 OS=Homo sapiens OX=9606 GN=DHX16 PE=1 SV=2	14	13	13	1	14	13	13	16.4	15.6	15.6	119.26	1041	1041	0	35.152	AAGEQEKLEATNR;ELLVLPIYANLPSDMQAR;FEDCTSER;FSTFFDDAPVFR;IFQPTPPGAR;LGNEVGYSIR;QQQTVFIHPNSSLFEQQPR;RFPVDIFYTK;TLHTDILFGLIK;TSLGNVVLLLK;VLVASATMDTAR;WLLYHELVLTTK;WVQDELHSVLGLSER;YMTDGMLLR		225;11302;13529;15387;22479;29908;42072;42941;50002;51105;54922;57535;57780;59061	True;True;True;True;True;True;True;True;True;True;True;True;True;False	235;12286;12287;14751;16817;24529;32652;46653;47584;55299;56534;60731;63620;63884;65293	2428;2429;2430;2431;144695;144696;144697;144698;172354;172355;172356;172357;172358;196015;196016;196017;196018;292772;292773;292774;292775;292776;292777;292778;292779;292780;395916;395917;395918;395919;395920;555125;555126;555127;555128;555129;566270;566271;566272;566273;566274;566275;659963;659964;659965;659966;659967;673544;673545;673546;673547;673548;673549;673550;673551;673552;673553;673554;6…	2248;2249;135281;135282;135283;160882;160883;182719;182720;182721;182722;273299;273300;273301;273302;273303;273304;369543;369544;369545;369546;369547;517364;517365;517366;517367;527589;527590;527591;527592;615089;615090;615091;615092;615093;627816;627817;627818;627819;627820;627821;627822;627823;627824;627825;627826;627827;678868;712723;712724;715253;715254;731427;731428;731429;731430;731431;7314…	2249;135281;160883;182720;273302;369545;517364;527590;615093;627818;678868;712724;715253;731427	745	655
550	sp|O60232|ZNRD2_HUMAN	sp|O60232|ZNRD2_HUMAN	Protein ZNRD2 OS=Homo sapiens OX=9606 GN=ZNRD2 PE=1 SV=1	3	3	3	1	3	3	3	15.1	15.1	15.1	21.474	199	199	0.00025634	6.6056	EHQLASASELPLGSR;LMGDYLLR;SLQQLQH		10504;32156;46154	True;True;True	11442;35095;51054	134930;134931;134932;134933;134934;134935;134936;134937;134938;134939;134940;426045;426046;426047;426048;426049;426050;426051;426052;426053;608600;608601;608602;608603	126358;126359;126360;126361;126362;126363;126364;126365;126366;126367;126368;397912;397913;397914;397915;397916;567123;567124;567125;567126	126359;397916;567125
551	sp|O60244|MED14_HUMAN	sp|O60244|MED14_HUMAN	Mediator of RNA polymerase II transcription subunit 14 OS=Homo sapiens OX=9606 GN=MED14 PE=1 SV=2	5	5	5	1	5	5	5	3.9	3.9	3.9	160.6	1454	1454	0.0023444	3.0189	ANTLIAFTK;ENIQDLVFR;HVYLTYENLLSEPVGGR;IIPWIQQLK;LPTVPMLGLTQR		3584;11692;21422;23179;32886	True;True;True;True;True	3919;12744;23397;25288;35919;35920	46105;149426;279251;302876;435266;435267	42837;139679;260786;282707;406523;406524	42837;139679;260786;282707;406524	746	890
552	sp|O60256|KPRB_HUMAN	sp|O60256|KPRB_HUMAN	Phosphoribosyl pyrophosphate synthase-associated protein 2 OS=Homo sapiens OX=9606 GN=PRPSAP2 PE=1 SV=1	11	10	10	1	11	10	10	41.2	37.4	37.4	40.925	369	369	0	30.247	AGLTHLITMDLHQK;EIQGFFNIPVDNLR;EKPPITVVGDVGGR;GKDVFIIQTVSK;IFVMATHGLLSSDAPR;RIEESAIDEVVVTNTIPHEVQK;SIIGVIPYFPYSK;SVAAIHPSLEIPMLIPK;TVDISMILSEAIR;VQIQESVR;VQVYQEPNR		1785;10730;10896;17582;22551;43089;45365;47704;51500;55686;55807	True;True;False;True;True;True;True;True;True;True;True	1930;11682;11859;19202;24605;24606;47739;50196;52772;56977;61623;61753	21841;21842;137591;137592;137593;137594;137595;137596;137597;137598;137599;137600;137601;137602;139892;139893;139894;139895;139896;139897;139898;139899;139900;139901;139902;139903;139904;139905;225253;225254;225255;225256;225257;225258;225259;225260;293759;293760;293761;293762;293763;293764;293765;293766;293767;569281;569282;569283;569284;569285;569286;569287;569288;569289;569290;569291;569292;56…	20358;20359;128759;128760;128761;128762;128763;128764;128765;128766;128767;128768;128769;128770;130954;130955;130956;130957;130958;130959;130960;130961;130962;130963;130964;130965;130966;209878;209879;209880;209881;209882;209883;209884;209885;274205;274206;274207;274208;274209;274210;274211;274212;274213;274214;530572;530573;530574;530575;530576;530577;530578;530579;530580;530581;530582;530583;53…	20359;128768;130964;209881;274212;530585;556668;585319;632830;689389;690836	747;748	296;343
553	sp|O60264|SMCA5_HUMAN	sp|O60264|SMCA5_HUMAN	SWI/SNF-related matrix-associated actin-dependent regulator of chromatin subfamily A member 5 OS=Homo sapiens OX=9606 GN=SMARCA5 PE=1 SV=1	37	37	22	1	37	37	22	33.2	33.2	22.6	121.9	1052	1052	0	69.707	ANRFEYLLK;ANYAVDAYFR;APFHQLR;CNELQDIEK;CNTLITLIER;DFNQFIK;DIDILNSAGK;EIQEPDPTYEEK;ESEITDEDIDGILER;FEDSPSYVK;FITDNTVEER;FVFMLSTR;IAFTEWIEPPKR;IGKDEMLQMIR;ISYGTNK;KANYAVDAYFR;LDGQTPHDER;LDSIVIQQGR;LFELLEK;LGFDKENVYDELR;LHMVLRPFLLR;LLNILMQLR;LLNILMQLRK;LLTQGFTNWNKR;LRLDSIVIQQGR;LVDQNLNK;NIPGPHMVLVPK;NYTEEEDRFLICMLHK;QNLLSVGDYR;QTELFAHFIQPAAQK;SVCLIGDKEQR;TLQTISLLGYMK;VLDILEDYCMWR;VLIFSQMTR;WGRDDIENI…		3566;3602;3674;6054;6071;6877;7234;10728;12196;13537;14228;15601;21606;22682;25045;25898;28549;28709;29269;29711;30214;31657;31658;31983;33572;34663;37921;39587;41824;42297;47721;50181;54279;54535;57412;58706;59001	True;True;True;True;True;True;True;True;True;True;True;True;True;True;True;True;True;True;True;True;True;True;True;True;True;True;True;True;True;True;True;True;True;True;True;True;True	3900;3938;4016;6598;6615;7489;7882;11680;13291;14759;15513;17052;23594;24749;27383;28299;31180;31358;31951;32437;32994;32995;34544;34545;34546;34891;36654;37836;42097;42098;43963;46390;46894;52790;55495;55496;60030;60304;63486;64895;65210	45902;45903;45904;45905;45906;45907;45908;46335;47245;47246;47247;47248;78377;78378;78379;78380;78381;78382;78383;78629;78630;78631;78632;78633;78634;78635;78636;89035;89036;89037;89038;89039;93972;93973;93974;137583;155066;155067;155068;155069;155070;155071;172467;172468;172469;172470;172471;172472;181496;181497;181498;181499;181500;181501;181502;198941;198942;198943;198944;198945;198946;198947;…	42659;42660;42661;42662;43059;43915;43916;43917;73063;73064;73065;73066;73067;73068;73302;73303;73304;73305;73306;73307;73308;73309;73310;83353;83354;83355;87907;87908;128751;144837;144838;144839;144840;144841;160990;160991;160992;160993;160994;160995;169324;169325;169326;185408;185409;185410;185411;185412;185413;185414;263129;263130;263131;263132;263133;263134;263135;263136;263137;263138;263139;…	42662;43059;43915;73063;73305;83355;87907;128751;144840;160994;169326;185411;263136;276056;306624;317043;352657;354537;360308;366856;373357;391677;391680;395701;414448;427202;470614;490887;514982;520107;585477;617080;671155;674201;711044;726909;730651	749;750;751	222;233;451
554	sp|O60271|JIP4_HUMAN;sp|Q9UPT6|JIP3_HUMAN	sp|O60271|JIP4_HUMAN	C-Jun-amino-terminal kinase-interacting protein 4 OS=Homo sapiens OX=9606 GN=SPAG9 PE=1 SV=4	17;1	17;1	17;1	2	17	17	17	17.8	17.8	17.8	146.2	1321	1321;1336	0	32.189	AGPSAQEPGSQTPLK;ATTPASTANSDVATIPTDTPLKEENEGFVK;ERPISLGIFPLPAGDGLLTPDAQK;FFVAVPGQVISPQSSSSGTDLTGDK;FQELSQPR;HIEVQVAQETR;ITALMVSCNR;KPEPPVNLK;LKDSILSIVHVK;LMELQEAVR;NLPVPVYLRPLDEK;SSIWQFFSR;TSGVPGNRPGSVIR;VESLESQTR;VQAFGWSLPQK;VTDAPNKSEISK;YNAPTSHVTPSVK		1831;4795;12133;13763;15017;20418;25068;27052;30739;32144;38333;47230;51070;52971;55596;56219;59072	True;True;True;True;True;True;True;True;True;True;True;True;True;True;True;True;True	1979;5227;13226;15003;16405;22290;27407;29560;33565;35079;42549;52257;56496;58582;61524;62194;65306	22503;22504;22505;22506;22507;22508;22509;22510;22511;22512;22513;22514;22515;22516;22517;22518;22519;22520;22521;22522;22523;22524;22525;62230;154375;154376;154377;154378;154379;154380;175123;175124;175125;175126;191518;191519;191520;191521;191522;191523;262899;262900;262901;262902;262903;262904;262905;262906;262907;262908;262909;262910;262911;328685;328686;328687;328688;355798;355799;355800;355…	20989;20990;20991;20992;20993;20994;20995;20996;20997;20998;20999;21000;21001;21002;21003;21004;21005;21006;21007;21008;21009;21010;57965;144196;144197;144198;144199;144200;144201;163445;163446;163447;178606;178607;178608;178609;245040;245041;245042;245043;245044;245045;245046;245047;245048;245049;245050;245051;245052;306856;306857;331891;331892;331893;331894;331895;331896;331897;380205;397813;47…	21003;57965;144200;163447;178607;245047;306857;331891;380205;397813;475138;579889;627400;652650;688309;696007;731552	752	523
556	sp|O60313|OPA1_HUMAN	sp|O60313|OPA1_HUMAN	Dynamin-like GTPase OPA1, mitochondrial OS=Homo sapiens OX=9606 GN=OPA1 PE=1 SV=3	25	25	25	1	25	25	25	32.2	32.2	32.2	111.63	960	960	0	53.561	AKNEILDEVISLSQVTPK;ALGYFAVVTGK;AVEVAWETLQEEFSR;EFDLTKEEDLAALR;EGCTVSPETISLNVK;ETIFSISK;FNLETEWK;GVEVDPSLIK;GVEVDPSLIKDTWHQVYR;HWEEILQQSLWER;IDQLQEELLHTQLK;IQQIIEGK;LAPDFDKIVESLSLLK;LDAFIEALHQEK;MVLVDLPGVINTVTSGMAPDTK;QQLTNTEVR;SIVTDLVSQMDPHGR;TIFVLTK;TQEQCVHNETKNELEK;TSVLEMIAQAR;VIQHNALEDR;VQLAEDLKK;VTLSEGPHHVALFK;VVVVGDQSAGK;YLILGSAVGGGYTAK		2465;2829;4988;9958;10151;12470;14836;19394;19395;21428;22038;24588;28072;28451;36891;42025;45525;49550;50822;51212;53966;55693;56361;56977;58874	True;True;True;True;True;True;True;True;True;True;True;True;True;True;True;True;True;True;True;True;True;True;True;True;True	2673;3063;5437;10849;11055;13594;16216;21180;21181;23403;24063;26865;30670;31078;40910;46604;50377;54801;56230;56656;59689;61630;62348;63027;65074	31667;31668;31669;31670;31671;31672;31673;31674;31675;31676;31677;31678;31679;31680;31681;36435;36436;36437;36438;36439;64944;64945;64946;64947;64948;64949;128312;128313;128314;128315;128316;128317;128318;130522;130523;130524;158241;189425;248307;248308;248309;248310;248311;248312;248313;279289;279290;279291;279292;287502;287503;287504;287505;287506;287507;287508;287509;287510;287511;322311;32231…	29536;29537;29538;29539;29540;29541;29542;29543;29544;29545;29546;29547;29548;33911;33912;60519;60520;60521;60522;60523;120235;120236;120237;120238;122275;147801;176648;231294;231295;231296;231297;231298;260820;260821;260822;268427;268428;268429;268430;268431;268432;268433;268434;268435;300917;300918;300919;300920;300921;300922;300923;300924;300925;300926;300927;346306;346307;346308;346309;346310…	29542;33911;60519;120237;122275;147801;176648;231295;231298;260822;268429;300926;346306;351873;457863;516923;558712;609410;624508;629153;666728;689444;697633;706080;729038
557	sp|O60331|PI51C_HUMAN	sp|O60331|PI51C_HUMAN	Phosphatidylinositol 4-phosphate 5-kinase type-1 gamma OS=Homo sapiens OX=9606 GN=PIP5K1C PE=1 SV=2	3	3	3	1	3	3	3	5.1	5.1	5.1	73.259	668	668	0	7.1185	DCLVLESFK;LLLHIGIIDILQSYR;VVVMNNILPR		6627;31545;56962	True;True;True	7214;34420;63011	85909;417894;417895;757289;757290;757291;757292;757293	80389;390070;390071;705960;705961;705962;705963;705964;705965	80389;390071;705960
558	sp|O60333|KIF1B_HUMAN;sp|Q12756|KIF1A_HUMAN	sp|O60333|KIF1B_HUMAN;sp|Q12756|KIF1A_HUMAN	Kinesin-like protein KIF1B OS=Homo sapiens OX=9606 GN=KIF1B PE=1 SV=5; Kinesin-like protein KIF1A OS=Homo sapiens OX=9606 GN=KIF1A PE=1 SV=2	4;3	2;1	2;1	2	4	2	2	2.6	1.4	1.4	204.47	1816	1816;1690	1	-2	AFVYLSNLLYPVPLIHR;DSVLTWLLR;FNHPEQAR;TVAATNMNETSSR	+	1561;8618;14824;51459	True;True;False;False	1685;9394;16204;56936	18517;111396;111397;111398;189331;189332;189333;678501;678502;678503;678504;678505;678506;678507;678508;678509	17218;104300;104301;176568;176569;176570;632465;632466;632467;632468;632469;632470	17218;104300;176568;632465	743	210
559	sp|O60341|KDM1A_HUMAN	sp|O60341|KDM1A_HUMAN	Lysine-specific histone demethylase 1A OS=Homo sapiens OX=9606 GN=KDM1A PE=1 SV=2	16	16	16	1	16	16	16	21.9	21.9	21.9	92.902	852	852	0	36.916	CDAVLCTLPLGVLK;EASEVKPPR;HGLINFGIYK;HGLINFGIYKR;HWDQDDDFEFTGSHLTVR;IADQFLGAMYTLPR;IKELHQQYK;LFFAGEHTIR;NYPATVHGALLSGLR;QQPPAVQFVPPLPEWK;QVNMELAK;TLQLWLDNPK;TQEELKELLNK;VFWDPSVNLFGHVGSTTASR;VIIIGSGVSGLAAAR;VVLCFDR		5650;9463;20278;20279;21426;21564;23313;29283;39570;42049;42522;50168;50811;53271;53864;56743	True;True;True;True;True;True;True;True;True;True;True;True;True;True;True;True	6159;10311;22145;22146;23401;23548;25430;31968;43945;46629;47134;55482;56219;58913;59561;62771	73637;73638;73639;73640;73641;73642;73643;73644;122285;260819;260820;260821;260822;260823;260824;260825;260826;260827;260828;260829;260830;260831;260832;260833;260834;260835;279282;279283;279284;281240;304983;304984;304985;304986;304987;304988;304989;304990;304991;304992;304993;304994;304995;304996;386423;386424;386425;386426;386427;386428;386429;386430;386431;386432;525998;525999;526000;554919;5…	68695;68696;68697;68698;68699;68700;68701;114546;243084;243085;243086;243087;243088;243089;243090;243091;243092;243093;243094;243095;243096;243097;243098;243099;260816;260817;262663;284744;284745;284746;284747;284748;284749;284750;284751;284752;284753;284754;284755;284756;360450;360451;360452;360453;360454;360455;360456;360457;360458;360459;490661;490662;490663;517176;517177;517178;517179;522989;…	68697;114546;243090;243099;260816;262663;284748;360454;490663;517178;522989;616988;624408;656593;664960;703208
560	sp|O60343|TBCD4_HUMAN	sp|O60343|TBCD4_HUMAN	TBC1 domain family member 4 OS=Homo sapiens OX=9606 GN=TBC1D4 PE=1 SV=2	22	22	21	1	22	22	21	20.9	20.9	20.3	146.56	1298	1298	0	34.902	AIHQQILLLR;ATDPSQVPDVISSIR;EVILVLSAPFLR;EVLITWDKK;FEINLISPDTK;FIHNSHDLTYFAYLIK;FSLHEQQR;HASAPSHVQPSDSEK;HLSSLTDNEQADIFER;IITQVFEMDISK;ILEDSGFDEQQEFR;IQALESNLENLLTR;KAIHQQILLLR;LEASRDELQSR;LLHDYHR;LLPADALVNCDLLLR;LWYVGGSCLDHR;MKPVSDQEENELVILHLR;QAFSTAAALQSAK;QLTAQQHAILVDLGR;SLTSSLENIFSR;SQKPEAGGCGAPAAR		2200;4602;12764;12806;13578;14121;15298;19917;20747;23251;23521;24420;25873;28818;31404;31681;35237;36214;40218;41651;46243;46900	True;True;True;True;True;True;True;True;True;True;True;True;True;True;True;True;True;True;True;True;True;True	2381;5021;13915;13961;14802;15397;16718;21750;22650;25363;25655;26682;28274;31474;34269;34569;38456;39843;44633;46181;51149;51902	27864;27865;27866;27867;27868;60238;60239;60240;60241;60242;162122;162123;162567;162568;162569;162570;162571;162572;162573;162574;162575;162576;162577;162578;172892;172893;172894;172895;172896;172897;172898;172899;172900;180049;180050;180051;180052;195033;255454;255455;255456;255457;255458;255459;255460;255461;255462;255463;255464;267329;267330;267331;267332;267333;267334;304323;304324;307970;320…	25972;25973;25974;25975;25976;56142;56143;56144;151411;151412;151805;151806;151807;161364;161365;161366;161367;161368;161369;161370;161371;161372;161373;167979;167980;167981;167982;167983;181812;238015;238016;238017;238018;238019;238020;238021;238022;238023;238024;238025;249100;249101;249102;249103;284138;284139;287465;298657;298658;298659;298660;298661;298662;298663;298664;316764;355646;388608;3…	25975;56142;151411;151806;161370;167983;181812;238022;249101;284139;287465;298659;316764;355646;388608;391847;435005;448072;497217;513181;568078;575897	758;759	502;1166
561	sp|O60427|FADS1_HUMAN	sp|O60427|FADS1_HUMAN	Acyl-CoA (8-3)-desaturase OS=Homo sapiens OX=9606 GN=FADS1 PE=1 SV=3	4	4	4	1	4	4	4	9.2	9.2	9.2	51.964	444	444	0.00025556	6.5252	HGIEYQSKPLLSAFADIIHSLK;ILSVELGK;PLLSAFADIIHSLK;VAPLVQSLCAK		20262;23865;39903;52302	True;True;True;True	22124;26036;44291;57866	260540;312990;529668;529669;529670;691442;691443	242812;292128;494023;494024;494025;644579;644580	242812;292128;494025;644580
562	sp|O60443|GSDME_HUMAN	sp|O60443|GSDME_HUMAN	Gasdermin-E OS=Homo sapiens OX=9606 GN=GSDME PE=1 SV=2	12	12	12	1	12	12	12	32.9	32.9	32.9	54.554	496	496	0	131.59	ALSDDGVSDLEDPTLTPLKDTER;EFAFIDMPDAAHGISSQDGPLSVLK;EVDADGDLIAVSNLNDSDKLQLLSLVTK;IDSVYLDPLVFR;KQEVDLQQLIR;LFASADISLER;LQIIPTLCHLLR;NEVLCVLTQK;NPVLQQVLEGR;QATLLLER;RIDSVYLDPLVFR;VESQSSFGTLR		3158;9947;12644;22065;27196;29204;33190;37451;38752;40343;43083;52977	True;True;True;True;True;True;True;True;True;True;True;True	3418;10837;13782;24091;29714;31885;36242;41591;43040;44767;47733;58588	40564;40565;40566;40567;40568;40569;40570;40571;40572;40573;40574;40575;128209;128210;128211;128212;128213;128214;128215;128216;128217;128218;128219;128220;128221;128222;128223;160608;160609;287779;287780;287781;287782;287783;287784;357844;357845;357846;357847;385517;439020;439021;439022;439023;439024;439025;439026;439027;439028;439029;439030;439031;439032;439033;439034;439035;439036;439037;43903…	37731;37732;37733;37734;37735;37736;37737;37738;37739;37740;120141;120142;120143;120144;120145;120146;120147;120148;120149;120150;120151;120152;120153;120154;120155;120156;149998;268679;268680;268681;268682;268683;268684;333732;333733;333734;333735;359611;409974;409975;409976;409977;409978;409979;409980;409981;409982;409983;409984;409985;409986;409987;409988;409989;409990;409991;409992;409993;465…	37731;120152;149998;268681;333735;359611;409983;465565;480862;498594;530549;652748
563	sp|O60476|MA1A2_HUMAN	sp|O60476|MA1A2_HUMAN	Mannosyl-oligosaccharide 1,2-alpha-mannosidase IB OS=Homo sapiens OX=9606 GN=MAN1A2 PE=1 SV=1	2	2	2	1	2	2	2	5.9	5.9	5.9	73.003	641	641	0.0025461	2.9609	FDLGLEDVLIPHVDAGK;WGQYHTSVGGLGDSFYEYLLK		13448;57411	True;True	14663;63485	171485;171486;762759	160093;160094;711042	160093;711042
564	sp|O60488|ACSL4_HUMAN	sp|O60488|ACSL4_HUMAN	Long-chain-fatty-acid--CoA ligase 4 OS=Homo sapiens OX=9606 GN=ACSL4 PE=1 SV=2	21	19	19	1	21	19	19	40.8	36.7	36.7	79.187	711	711	0	119.71	ALLGGNVR;EAVVHGLNESEASYLITSVELLESK;GDCTVLKPTLMAAVPEIMDR;GEIVIGGQNISMGYFK;GYDAPLCNLLLFK;HIIYVDNK;IGYSSPLTLSDQSSK;LQAGEYVSLGK;LSPEPWTPETGLVTDAFK;LTLLAQQK;NCPLIDNICAFAK;NTIAIFCETR;SDQSYVISFVVPNQK;SVTHFDSLAVIDIPGADTLDK;SVTHFDSLAVIDIPGADTLDKLFDHAVSK;TALLDISCVK;VGAPLICCEIK;VNNFGSGLTALGLKPK;VQEMNYIQK;WFCTGDIGEFHPDGCLQIIDR;YNFPLVTLYATLGK		2933;9549;16295;16553;19693;20440;22815;32969;33982;34373;37236;39127;44347;47983;47984;48374;53291;55232;55644;57361;59091	True;True;True;True;True;True;True;False;False;True;True;True;True;True;True;True;True;True;True;True;True	3172;10403;17814;18088;21512;22313;24895;36006;37096;37516;41359;43457;49086;53077;53078;53516;58937;61120;61575;63432;65325	38092;38093;38094;38095;38096;38097;38098;123308;123309;123310;123311;123312;123313;123314;123315;123316;123317;123318;123319;208290;211554;211555;252524;252525;252526;252527;252528;252529;252530;252531;252532;252533;252534;252535;252536;252537;252538;252539;252540;252541;263151;263152;263153;263154;263155;263156;263157;263158;263159;263160;263161;263162;263163;263164;263165;297319;297320;297321;…	35460;35461;35462;35463;115496;115497;115498;115499;115500;115501;115502;115503;115504;115505;115506;115507;194111;197102;235224;235225;235226;235227;235228;235229;235230;235231;235232;235233;235234;235235;235236;235237;235238;235239;235240;235241;235242;235243;245272;245273;245274;245275;245276;245277;245278;245279;245280;245281;245282;245283;245284;245285;277471;277472;277473;277474;277475;4073…	35460;115506;194111;197102;235234;245277;277475;407328;419238;423644;463069;485261;544606;588815;588820;593642;656778;683093;688799;710345;731738
565	sp|O60493|SNX3_HUMAN	sp|O60493|SNX3_HUMAN	Sorting nexin-3 OS=Homo sapiens OX=9606 GN=SNX3 PE=1 SV=3	15	15	13	1	15	15	13	79.6	79.6	75.3	18.762	162	162	0	50.615	AETVADTR;AETVADTRR;CLHMFLQDEIIDK;FTTYEIR;GDDGIFDDNFIEER;GRFTTYEIR;KQGLEQFINK;LITKPQNLNDAYGPPSNFLEIDVSNPQTVGVGR;QGLEQFINK;QLPFRGDDGIFDDNFIEER;RYSDFEWLR;TNLPIFK;VAGHPLAQNER;VVVPPLPGK;YSDFEWLR		1289;1290;5963;15521;16297;18820;27207;30647;40847;41549;43833;50459;52158;56964;59386	True;True;True;True;True;True;True;True;True;True;True;True;True;True;True	1388;1389;6490;6491;16962;17816;20568;29726;33466;45320;46072;48529;55831;57703;63013;65647	14922;14923;14924;14925;14926;14927;14928;14929;14930;14931;14932;14933;14934;14935;14936;14937;14938;14939;14940;14941;14942;14943;14944;14945;14946;14947;14948;14949;14950;14951;14952;14953;14954;14955;14956;14957;14958;77402;77403;77404;77405;77406;77407;77408;77409;77410;77411;77412;77413;77414;77415;77416;77417;77418;77419;77420;77421;77422;197890;197891;197892;197893;197894;197895;208302;20…	13831;13832;13833;13834;13835;13836;13837;13838;13839;13840;13841;13842;13843;13844;13845;13846;13847;13848;13849;13850;13851;13852;13853;13854;13855;13856;13857;13858;13859;13860;13861;13862;13863;13864;13865;72154;72155;72156;72157;72158;72159;72160;72161;72162;72163;72164;72165;72166;72167;72168;72169;72170;72171;72172;184424;184425;184426;194121;194122;194123;194124;194125;194126;194127;19412…	13833;13857;72158;184425;194128;224611;333897;378940;504177;512088;539034;620553;642034;705977;735419	760	143
566	sp|O60499|STX10_HUMAN	sp|O60499|STX10_HUMAN	Syntaxin-10 OS=Homo sapiens OX=9606 GN=STX10 PE=1 SV=1	2	2	2	1	2	2	2	8.4	8.4	8.4	28.114	249	249	0.008307	2.1577	FKLPAGDLQER;SLEDPFFVVR		14299;45768	True;True	15592;50636	182571;602990;602991;602992;602993;602994	170350;561843;561844;561845;561846;561847	170350;561843
567	sp|O60502|OGA_HUMAN	sp|O60502|OGA_HUMAN	Protein O-GlcNAcase OS=Homo sapiens OX=9606 GN=OGA PE=1 SV=2	16	16	16	1	16	16	16	20.3	20.3	20.3	102.91	916	916	0	36.863	ANSSVVSVNCK;ESQATLEER;GGLAGEFQR;ISWIPFMQEK;KLDQVSQFGCR;LALTEWLQEFGVPHQYSSR;LGCFEIAK;LLPGIEVLWTGPK;LLPIDGANDLFFQPPPLTPTSK;SFVQWLGCR;SHSSAQFLIGDQEPWAFR;SMMACLLSSLK;STELIPR;VTDPSVAK;VYTIRPYFPK;WELNTYLYAPK		3579;12301;17039;25039;26661;28029;29615;31705;31715;44858;45257;46364;47462;56232;57195;57341	True;True;True;True;True;True;True;True;True;True;True;True;True;True;True;True	3914;13409;18615;27374;27375;29126;30615;32332;34593;34605;49639;50081;51297;52506;62207;63260;63411	46059;46060;46061;46062;46063;46064;46065;46066;46067;46068;46069;46070;46071;46072;46073;156137;156138;156139;156140;156141;156142;156143;156144;156145;217699;217700;217701;217702;217703;217704;217705;217706;328345;328346;328347;328348;328349;328350;328351;328352;328353;328354;328355;328356;328357;328358;328359;328360;328361;328362;328363;350598;350599;350600;350601;370525;370526;370527;370528;3…	42797;42798;42799;42800;42801;42802;42803;42804;42805;42806;42807;42808;42809;42810;42811;145808;145809;145810;145811;145812;145813;145814;202841;202842;202843;202844;202845;202846;202847;202848;306554;306555;306556;306557;306558;306559;306560;306561;306562;306563;306564;306565;306566;306567;306568;306569;306570;327224;327225;327226;327227;345539;345540;345541;345542;345543;345544;345545;345546;3…	42805;145808;202844;306554;327226;345542;364906;392110;392234;550099;555477;569594;582148;696149;708560;710199
568	sp|O60504|VINEX_HUMAN	sp|O60504|VINEX_HUMAN	Vinexin OS=Homo sapiens OX=9606 GN=SORBS3 PE=1 SV=2	9	9	9	1	9	9	9	17.4	17.4	17.4	75.34	671	671	0	30.05	AMYQYRPQNEDELELR;DFVYPSSTR;DPSASNGGGSPAR;EVDKNWLEGEHHGR;GDIVYIHK;GPSHPLDLGTSSPNTSQIHWTPYR;KGEHICLIR;LKFDFQAQSPK;QGIFPASYVQVSR		3446;6931;8250;12664;16347;18569;26300;30803;40830	True;True;True;True;True;True;True;True;True	3770;7550;9004;13804;17871;20290;28728;33634;45303	44643;44644;44645;44646;44647;44648;89668;89669;89670;107234;160898;160899;160900;160901;208848;237928;237929;345211;345212;345213;345214;345215;345216;345217;345218;345219;345220;345221;345222;345223;345224;408112;408113;408114;408115;540638;540639;540640;540641	41514;41515;41516;41517;41518;41519;83930;83931;83932;100452;150274;150275;194620;221718;221719;322255;322256;322257;322258;322259;322260;322261;322262;322263;322264;322265;322266;322267;322268;380888;380889;380890;380891;380892;504048;504049;504050;504051	41515;83931;100452;150275;194620;221718;322263;380889;504051
569	sp|O60506|HNRPQ_HUMAN	sp|O60506|HNRPQ_HUMAN	Heterogeneous nuclear ribonucleoprotein Q OS=Homo sapiens OX=9606 GN=SYNCRIP PE=1 SV=2	25	25	21	1	25	25	21	45.1	45.1	38.7	69.602	623	623	0	323.31	AGPIWDLR;AIEALKEFNEDGALAVLQQFK;DLEGENIEIVFAKPPDQK;DLFEDELVPLFEK;DSDLSHVQNK;DYAFIHFDER;DYAFIHFDERDGAVK;EFNEDGALAVLQQFK;EQILEEFSK;GFCFLEYEDHK;GYAFVTFCTK;KYGGPPPDSVYSGQQPSVGTEIFVGK;LDEIYVAGLVAHSDLDER;LKDYAFIHFDER;LMMDPLTGLNR;LYNNHEIR;NLANTVTEEILEK;NQMYDDYYYYGPPHMPPPTR;SAFLCGVMK;TGYTLDVTTGQR;TKEQILEEFSK;VAEKLDEIYVAGLVAHSDLDER;VTEGLTDVILYHQPDDK;VWGNVGTVEWADPIEDPDPEVMAK;YGGPPPDSVYSGQQPSVGTEIFVGK		1828;2107;7643;7680;8470;9009;9010;10045;11971;16695;19685;27628;28504;30743;32186;35383;38065;38831;43910;49366;49762;52114;56250;57029;58380	True;True;True;True;True;True;True;True;True;True;True;True;True;True;True;True;True;True;True;True;True;True;True;True;True	1976;2280;8317;8354;9238;9815;9816;10940;13044;18240;21504;30177;31133;33569;35138;35139;35140;38612;42256;43123;48611;48612;54601;55038;57656;62228;63085;64536	22483;22484;22485;22486;22487;22488;26627;26628;26629;26630;26631;26632;26633;26634;26635;26636;26637;26638;26639;26640;26641;26642;26643;26644;26645;26646;26647;26648;26649;26650;26651;26652;26653;26654;26655;26656;26657;26658;98977;98978;98979;99242;99243;99244;99245;99246;99247;99248;99249;99250;99251;99252;99253;99254;99255;99256;99257;99258;99259;99260;99261;99262;99263;99264;99265;99266;992…	20970;20971;20972;20973;20974;20975;24833;24834;24835;24836;24837;24838;24839;24840;24841;24842;24843;24844;24845;24846;24847;24848;24849;24850;24851;24852;24853;24854;24855;24856;24857;24858;24859;24860;24861;24862;24863;24864;92554;92795;92796;92797;92798;92799;92800;92801;92802;92803;92804;92805;92806;92807;92808;92809;92810;92811;92812;92813;92814;92815;92816;92817;92818;92819;92820;92821;928…	20974;24852;92554;92821;102754;108973;108974;121032;142340;198589;235155;340999;352239;380224;398348;436289;472245;481671;539920;606028;612374;641559;696322;706622;722515	673;761;762	99;194;195
570	sp|O60513|B4GT4_HUMAN	sp|O60513|B4GT4_HUMAN	Beta-1,4-galactosyltransferase 4 OS=Homo sapiens OX=9606 GN=B4GALT4 PE=1 SV=1	3	3	3	1	3	3	3	10.5	10.5	10.5	40.041	344	344	0.0002551	6.4685	ISRPLPEVGK;LIFKPDLTLEEVQAENPK;VAILVPHR		24977;30415;52207	True;True;True	27305;33207;57758	327399;327400;327401;327402;327403;327404;327405;327406;327407;327408;327409;327410;402998;402999;403000;403001;403002;403003;403004;403005;689563;689564;689565	305645;305646;305647;305648;305649;305650;305651;305652;305653;376157;376158;376159;376160;376161;376162;376163;642782;642783	305645;376158;642783
571	sp|O60518|RNBP6_HUMAN	sp|O60518|RNBP6_HUMAN	Ran-binding protein 6 OS=Homo sapiens OX=9606 GN=RANBP6 PE=1 SV=2	12	10	10	1	12	10	10	14.2	12.5	12.5	124.71	1105	1105	0	26.118	AATASAGVPATVSEKQEFYQLLK;EGFVEYTEQVVK;FYFHDNVR;HIVELAVQK;ILGKDFQQYLPLVIEPLIK;KFHETVIAALLR;LALEQLVTTIASVADTIEEK;LCDIFAVLAR;LLDQCIQDQEHPAIR;LMVPLLK;TTFLLDAVR;VSDILHSLFSTYK		547;10201;15811;20493;23601;26210;27976;28343;31117;32241;51278;55922	True;False;True;True;True;True;True;True;True;False;True;True	587;11108;17281;22369;25737;28630;30559;30963;33967;35223;35224;56732;61875	6190;130997;130998;130999;131000;131001;131002;131003;131004;131005;131006;131007;131008;131009;131010;131011;131012;201724;201725;263901;263902;263903;263904;263905;263906;308969;308970;344025;369966;369967;375122;375123;375124;375125;375126;375127;375128;375129;375130;412674;427194;427195;427196;427197;427198;427199;427200;427201;427202;427203;427204;427205;427206;427207;427208;427209;427210;42…	5757;122710;122711;122712;122713;122714;122715;122716;122717;122718;122719;122720;122721;122722;122723;122724;122725;188013;188014;245959;245960;245961;245962;288386;288387;321178;345035;345036;349851;349852;349853;349854;349855;385148;398960;398961;398962;398963;398964;398965;398966;398967;398968;398969;398970;398971;398972;398973;398974;398975;398976;398977;398978;398979;629829;629830;629831;62…	5757;122710;188014;245959;288387;321178;345036;349852;385148;398975;629832;691983
572	sp|O60524|NEMF_HUMAN	sp|O60524|NEMF_HUMAN	Ribosome quality control complex subunit NEMF OS=Homo sapiens OX=9606 GN=NEMF PE=1 SV=4	19	19	19	1	19	19	19	21.8	21.8	21.8	122.95	1076	1076	0	51.563	ATLLLESGIR;AVLAELNASLLGMR;DQQQNEIIVK;EAQAQGDPVASAIK;ERYPLDHAR;ESTVHIETHQNTSK;EVQTVTSIQK;FSTIDLR;IHTTEFEWPK;LLGSAGSNKEEK;LQTNHVTMLLR;LTEIVASAPK;SALANQIDWTEIGLIVK;SVKDTDLSR;TAPTGEYLTTGSFMIR;VITSAWWVYHHQVSK;VLNPLLPYGPALIEHCLLENGFSGNVK;VNNVYDVDNK;VSAPNLLNVK		4715;5096;8360;9432;12150;12348;12891;15389;22919;31382;33427;34247;43971;47841;48418;54017;54686;55238;55903	True;True;True;True;True;True;True;True;True;True;True;True;True;True;True;True;True;True;True	5145;5553;9122;10279;13243;13460;14059;16819;25004;34247;36504;37380;48678;52921;53570;59744;60468;61127;61854	61482;66519;108422;108423;108424;108425;108426;108427;108428;108429;108430;108431;108432;108433;108434;121827;121828;121829;121830;121831;121832;121833;121834;121835;121836;121837;121838;121839;121840;121841;121842;121843;154592;154593;156870;156871;156872;156873;156874;156875;163576;163577;163578;163579;163580;163581;163582;163583;163584;163585;163586;163587;163588;163589;163590;196030;196031;19…	57296;62011;101575;101576;101577;101578;101579;101580;101581;101582;101583;101584;101585;101586;101587;114110;114111;114112;114113;114114;114115;114116;114117;114118;114119;114120;114121;114122;114123;114124;144402;144403;146497;146498;146499;146500;152711;152712;152713;152714;152715;152716;152717;152718;152719;152720;152721;152722;152723;182733;182734;278887;278888;278889;278890;278891;388332;38…	57296;62011;101582;114114;144402;146497;152719;182733;278889;388335;412929;422012;540688;586911;594248;667543;675740;683226;691775	763	24
573	sp|O60547|GMDS_HUMAN	sp|O60547|GMDS_HUMAN	GDP-mannose 4,6 dehydratase OS=Homo sapiens OX=9606 GN=GMDS PE=1 SV=1	6	6	6	1	6	6	6	21.2	21.2	21.2	41.949	372	372	0	19	EAYNLFAVNGILFNHESPR;FYQASTSELYGK;GYEVHGIVR;IINEVKPTEIYNLGAQSHVK;NPQAHIEGNMK;VHVTVDLK		9562;15858;19709;23142;38720;53710	True;True;True;True;True;True	10417;17331;21528;25248;43002;59394	123431;123432;202409;202410;202411;202412;202413;252751;252752;302354;302355;302356;302357;302358;302359;514981;711082;711083	115597;115598;188639;188640;188641;235447;235448;282203;282204;282205;282206;282207;282208;282209;480466;662977;662978	115598;188639;235447;282203;480466;662977
574	sp|O60551|NMT2_HUMAN	sp|O60551|NMT2_HUMAN	Glycylpeptide N-tetradecanoyltransferase 2 OS=Homo sapiens OX=9606 GN=NMT2 PE=1 SV=1	5	2	2	1	5	2	2	11.2	4.8	4.8	56.98	498	498	0.00045988	4.1739	GFDVFNALDLMENK;LVGFISAIPANIR;MVEINFLCVHK;SDSASDSQEIK;VAPVLIR		16707;34750;36858;44353;52307	False;True;False;True;False	18253;18254;37929;40855;49092;57872	213276;213277;213278;213279;213280;213281;213282;213283;213284;213285;458876;458877;458878;458879;458880;458881;458882;490061;490062;490063;584568;691472;691473;691474;691475;691476;691477;691478;691479;691480	198685;198686;198687;198688;198689;198690;198691;428317;428318;428319;428320;428321;428322;428323;457319;457320;457321;544704;644604;644605;644606;644607;644608;644609	198686;428321;457321;544704;644605	764	458
575	sp|O60565|GREM1_HUMAN;sp|Q9H772|GREM2_HUMAN	sp|O60565|GREM1_HUMAN	Gremlin-1 OS=Homo sapiens OX=9606 GN=GREM1 PE=1 SV=1	10;1	10;1	10;1	2	10	10	10	62	62	62	20.697	184	184;168	0	80.125	AQHNDSEQTQSPQQPGSR;EEGSFQSCSFCKPK;FCYGQCNSFYIPR;GSQGAIPPPDK;GSQGAIPPPDKAQHNDSEQTQSPQQPGSR;GTAMPGEEVLESSQEALHVTER;GTAMPGEEVLESSQEALHVTERK;KFTTMMVTLNCPELQPPTK;QTIHEEGCNSR;TQPLKQTIHEEGCNSR		3962;9830;13388;19054;19055;19152;19153;26251;42320;50902	True;True;True;True;True;True;True;True;True;True	4329;10710;14596;20816;20817;20921;20922;20923;28674;28675;28676;46918;56316	51967;51968;51969;51970;51971;51972;51973;51974;51975;51976;127112;127113;127114;127115;127116;127117;127118;127119;127120;170517;170518;170519;170520;170521;170522;170523;170524;170525;170526;170527;170528;170529;170530;170531;170532;170533;170534;170535;170536;170537;170538;170539;170540;170541;170542;170543;170544;170545;170546;170547;170548;170549;243892;243893;243894;243895;243896;243897;243…	48556;48557;48558;48559;48560;48561;48562;48563;119141;119142;119143;119144;119145;159180;159181;159182;159183;159184;159185;159186;159187;159188;159189;159190;159191;159192;159193;159194;159195;159196;159197;159198;159199;159200;159201;159202;159203;159204;159205;159206;159207;159208;159209;159210;227219;227220;227221;227222;227223;227224;227225;227226;227227;228309;228310;228311;228312;228313;2…	48563;119143;159192;227219;227226;228314;228331;321627;520360;625307	765;766;767	68;152;153
576	sp|O60568|PLOD3_HUMAN	sp|O60568|PLOD3_HUMAN	Multifunctional procollagen lysine hydroxylase and glycosyltransferase LH3 OS=Homo sapiens OX=9606 GN=PLOD3 PE=1 SV=1	32	32	32	1	32	32	32	55.3	55.3	55.3	84.784	738	738	0	231.54	AVMNFVVR;DKGIFLHLSNQHEFGR;DMAMDLCR;DVFSGSDTDPDMAFCK;FLNSGGFIGFATTIHQIVR;GIFLHLSNQHEFGR;GLDYEGGGCR;IFQNLNGALDEVVLK;IFQNLNGALDEVVLKFDR;ILIEENRK;KGWALLHPGR;LAGGYENVPTVDIHMK;LLFSAESFCWPEWGLAEQYPEVGTGK;LLFSAESFCWPEWGLAEQYPEVGTGKR;LLLLDYPPDR;LLVITVATAETEGYLR;LSLNLDHK;LTHYHEGLPTTWGTR;LVGPEEALSPGEAR;LWSNFWGALSPDEYYAR;LYLDPGLR;QVGYEDQWLQLLR;SEDYVELVQR;TLGLGEEWR;TLPGGQPPPR;TYVGPMTESLFPGYHTK;VFLAVFVEQPTPFLP…		5171;7465;8012;8830;14560;17355;17745;22477;22478;23656;26421;27899;31319;31320;31565;32029;33934;34334;34763;35218;35351;42466;44440;49976;50134;51994;53146;53570;53733;56344;58080;58709	True;True;True;True;True;True;True;True;True;True;True;True;True;True;True;True;True;True;True;True;True;True;True;True;True;True;True;True;True;True;True;True	5636;5637;8126;8719;9619;9620;15879;18955;19372;24527;24528;25799;28861;30475;34182;34183;34442;34940;37040;37475;37943;38437;38576;47071;49185;55266;55447;57513;57514;58778;59241;59421;62330;64217;64898	67616;67617;67618;67619;67620;67621;67622;67623;67624;67625;67626;67627;67628;67629;67630;67631;67632;67633;67634;67635;67636;96614;96615;96616;96617;96618;96619;96620;96621;96622;96623;96624;96625;96626;96627;104056;104057;104058;114319;114320;114321;114322;114323;114324;114325;114326;114327;114328;114329;185752;185753;185754;185755;185756;185757;185758;185759;185760;185761;185762;185763;185764;…	63038;63039;63040;63041;63042;63043;63044;63045;63046;63047;63048;63049;63050;63051;63052;63053;63054;63055;63056;63057;90348;90349;90350;90351;90352;90353;90354;90355;90356;90357;90358;90359;90360;97427;107070;107071;107072;107073;107074;107075;107076;107077;107078;173246;173247;173248;173249;173250;173251;173252;173253;173254;173255;173256;173257;173258;173259;173260;173261;173262;173263;173264…	63053;90356;97427;107075;173265;206663;211517;273296;273298;289229;323730;344065;387537;387538;390393;396213;418622;423193;428474;434884;436020;522111;545690;614798;616620;639934;655158;660552;663301;697426;718794;726951	768;769;770	491;634;650
577	sp|O60573|IF4E2_HUMAN	sp|O60573|IF4E2_HUMAN	Eukaryotic translation initiation factor 4E type 2 OS=Homo sapiens OX=9606 GN=EIF4E2 PE=1 SV=1	6	6	6	1	6	6	6	36.3	36.3	36.3	28.362	245	245	0	34.131	AVVPGPAEHPLQYNYTFWYSR;FQEDIISIWNK;FYSHMVRPGDLTGHSDFHLFK;LLFQNLWKPR;QIGTFASVEQFWR;VLNLPPNTIMEYK		5344;15005;15872;31316;41057;54679	True;True;True;True;True;True	5830;16393;17347;34179;45548;60459	69414;69415;69416;69417;69418;69419;69420;69421;69422;191397;191398;191399;191400;191401;191402;191403;191404;191405;202570;202571;202572;202573;202574;202575;202576;202577;415167;415168;415169;415170;415171;415172;415173;415174;415175;415176;415177;415178;415179;415180;415181;415182;543689;543690;543691;543692;543693;543694;543695;543696;543697;543698;543699;543700;543701;543702;543703;724654;72…	64678;64679;64680;64681;64682;64683;64684;178503;178504;178505;178506;178507;178508;178509;178510;188785;188786;188787;188788;188789;188790;387517;387518;387519;387520;387521;387522;387523;387524;387525;387526;387527;387528;387529;387530;387531;387532;506867;506868;506869;506870;506871;506872;506873;506874;506875;506876;506877;506878;506879;675634;675635	64678;178508;188789;387523;506874;675635
578	sp|O60610|DIAP1_HUMAN	sp|O60610|DIAP1_HUMAN	Protein diaphanous homolog 1 OS=Homo sapiens OX=9606 GN=DIAPH1 PE=1 SV=2	44	44	44	1	44	44	44	34.7	34.7	34.7	141.35	1272	1272	0	138.21	AEMDEVER;AEPHFLSILQHLLLVR;AGCAVTSLLASELTK;AMDPAVPNMMIDAAK;DDAMAAVPAK;DMPLLSCLESLR;EIENEDMR;ELGEYFLFDPK;ELGEYFLFDPKK;EMVSQYLYTSK;FENNELFAK;FPDELAHVEK;FQPLLDGLK;GRLDDIR;HELQVEMK;KAGCAVTSLLASELTK;KLDSELTAR;KLSVEEFFMDLHNFR;KMESDFEQK;LGLHQVLQDLR;LHDEKEETAGSYDSR;LIEECISQIVLHK;LLSALCILPQPEDMNER;LMADELER;LNAILFK;LQDLQGEKDALHSEK;LSVEEFFMDLHNFR;LTLTFSAQTK;LVAEDLSQDCFWTK;LYKPEVQLR;MEPPGGSLGPGR;MESDFEQK;NDYE…		1188;1226;1618;3351;6649;8045;10593;11121;11122;11640;13601;14893;15075;18825;20064;25856;26662;26872;26941;29848;30113;30369;31855;32110;32253;33025;34127;34396;34599;35345;35830;35839;37347;38461;38940;38941;40449;41994;44015;46577;48430;50360;54326;55882	True;True;True;True;True;True;True;True;True;True;True;True;True;True;True;True;True;True;True;True;True;True;True;True;True;True;True;True;True;True;True;True;True;True;True;True;True;True;True;True;True;True;True;True	1276;1321;1747;3632;3633;7236;8770;8771;11536;11537;12097;12098;12688;12689;14827;16274;16472;20573;21910;28256;29127;29353;29354;29430;32586;32882;33160;34751;34752;35023;35237;36066;37247;37541;37768;38569;39250;39264;41479;42698;42699;43245;43246;44879;46570;48725;51545;53584;55706;55707;60079;60080;61832	13861;13862;13863;14271;14272;14273;14274;14275;14276;14277;14278;14279;14280;14281;14282;14283;14284;14285;14286;14287;14288;19280;19281;43519;43520;43521;43522;86088;104377;104378;104379;104380;104381;104382;104383;104384;104385;104386;104387;136076;136077;142538;142539;142540;142541;142542;142543;142544;142545;142546;142547;148836;148837;148838;148839;148840;148841;148842;148843;148844;148845;…	12859;12860;12861;13233;13234;13235;13236;13237;13238;13239;13240;13241;13242;13243;13244;13245;13246;13247;13248;17923;17924;40513;40514;40515;80556;97696;97697;97698;97699;97700;97701;97702;97703;97704;97705;97706;127394;127395;133329;133330;133331;133332;133333;133334;133335;133336;133337;139121;139122;139123;139124;139125;139126;139127;139128;139129;139130;139131;139132;139133;139134;139135;1…	12861;13237;17924;40515;80556;97699;127394;133331;133337;139135;161661;177210;179239;224638;239736;316610;327228;329581;330545;368566;371758;375745;394357;397311;399129;408318;420895;423923;426477;435987;442429;442534;464345;476924;483043;483051;499915;516544;541097;572140;594452;619226;671996;691553	771;772;773;774;775;776;777;778;779;780;781;782;783	1;124;159;234;248;255;256;275;283;358;505;1136;1144
579	sp|O60637|TSN3_HUMAN	sp|O60637|TSN3_HUMAN	Tetraspanin-3 OS=Homo sapiens OX=9606 GN=TSPAN3 PE=1 SV=1	2	2	2	1	2	2	2	9.1	9.1	9.1	28.017	253	253	0.0025435	2.9507	AIDYVQR;SRDPAYELLITGGTYA		2105;47026	True;True	2278;52035	26589;26590;26591;26592;26593;26594;26595;26596;26597;26598;619613;619614;619615	24804;24805;577405;577406;577407	24805;577405
580	sp|O60645|EXOC3_HUMAN	sp|O60645|EXOC3_HUMAN	Exocyst complex component 3 OS=Homo sapiens OX=9606 GN=EXOC3 PE=1 SV=3	9	9	9	1	9	9	9	16.8	16.8	16.8	85.566	745	745	0	14.309	DAVVQHSQLAAAVENLK;ETQDLIEQGALLQAHR;IEGTQADTR;LTDPSLLYLEVSTLVSK;MFTILER;NIFSVPEIVR;QTIMETLEQGPAQASPSYVPLFK;RDPTLLVSVVR;VLVLCLQQMNSFLSR		6593;12525;22195;34223;35925;37827;42321;42839;54953	True;True;True;True;True;True;True;True;True	7179;13654;24226;37356;39389;41995;46919;47473;60764	85547;85548;159061;159062;159063;159064;159065;159066;159067;289449;289450;289451;451819;451820;451821;475528;475529;475530;475531;503286;503287;503288;503289;558365;565129;728515	80064;148541;148542;148543;148544;270233;270234;270235;421826;421827;443928;443929;469633;469634;520362;526552;679236	80064;148542;270234;421827;443929;469633;520362;526552;679236
[truncated: 4,397 more rows]

## Sheet: QUANTIFICATION
Table S1B. List of 2,829 proteins quantified using nanoLC-MS/MS analysis in HFF1 cells
	Identification DATA from Maxquant (Andromeda) - Human proteome Swissprot (06/03/2025, 20418 entries)																		Quantitative DATA from maxquant (Andromeda)
																			FBS								SBS							WBS								POOL-MIX (Reference sample)
Line nber	Protein IDs	Majority protein IDs	Fasta headers	Peptide counts (all)	Peptide counts (razor+unique)	Peptide counts (unique)	Number of proteins	Peptides	Razor + unique peptides	Unique peptides	Sequence coverage [%]	Unique + razor sequence coverage [%]	Unique sequence coverage [%]	Mol. weight [kDa]	Sequence length	Sequence lengths	Q-value	Score	LFQ intensity	LFQ intensity	LFQ intensity	MOYENNE	MEDIANE	SD	SEM	CV (%)	LFQ intensity	LFQ intensity	LFQ intensity	MOYENNE	MEDIANE	SD	SEM	LFQ intensity	LFQ intensity	LFQ intensity	LFQ intensity	MOYENNE	MEDIANE	SD	SEM	LFQ intensity	LFQ intensity	LFQ intensity	LFQ intensity	LFQ intensity	MOYENNE	MEDIANE	SD
228	sp|A0A0C4DH68|KV224_HUMAN;sp|A0A075B6R9|KVD24_HUMAN	sp|A0A0C4DH68|KV224_HUMAN;sp|A0A075B6R9|KVD24_HUMAN	Immunoglobulin kappa variable 2-24 OS=Homo sapiens OX=9606 GN=IGKV2-24 PE=1 SV=1; Probable non-functional immunoglobulin kappa variable 2D-24 OS=Homo sapiens OX=9606 GN=IGKV2D-24 PE=1 SV=1	2;2	1;1	1;1	2	2	1	1	16.7	10.8	10.8	13.079	120	120;120	0.0013049	3.2975									9408800	9302900	29105000	15938900	9408800	1.14023e+07	6.58312e+06	16614000	17248000	25563000	16827000	19063000	17037500	4.34133e+06	2.17067e+06
[truncated: 2,828 more rows]
[truncated: 10 more columns]
